# Supplementary material
Source: PubMed Central journal article supplement (PMC4667793)
Supplement: NIHMS740676-supplement-SI-1.pdf [file NIHMS740676-supplement-SI-1.pdf]

# SUPPORTING INFORMATION

## Targeting *Mycobacterium tuberculosis* Biotin Protein Ligase (MtBPL) with Nucleoside-Based Bisubstrate Adenylation Inhibitors

Matthew R. Bockman,<sup>a</sup> Alvin S. Kalinda,<sup>a,b</sup> Riccardo Petrelli,<sup>b</sup> Teresa De la Mora-Rey,<sup>a</sup> Divya Tawari,<sup>c</sup> Feng Liu,<sup>a</sup> Dirk Schnappinger,<sup>c</sup> Barry C. Finzel,<sup>a</sup> Courtney C. Aldrich<sup>a,b\*</sup>

<sup>a</sup>Department of Medicinal Chemistry, University of Minnesota, Minneapolis, Minnesota, MN 55455, USA

<sup>b</sup>Center for Drug Design, Academic Health Center, University of Minnesota, Minneapolis, MN 55455 USA

<sup>c</sup>Department of Microbiology and Immunology, Weill Cornell Medical College, New York, NY 10021, USA

### Table of Contents:

|                                                              |          |
|--------------------------------------------------------------|----------|
| Raw ITC Data (Figures S1–14).....                            | S2       |
| Raw ITC Values (Table S1).....                               | S16      |
| Crystallographic Data (Table S2).....                        | S17      |
| <sup>1</sup> H and <sup>13</sup> C NMR of all Compounds..... | S20–S112 |

**A**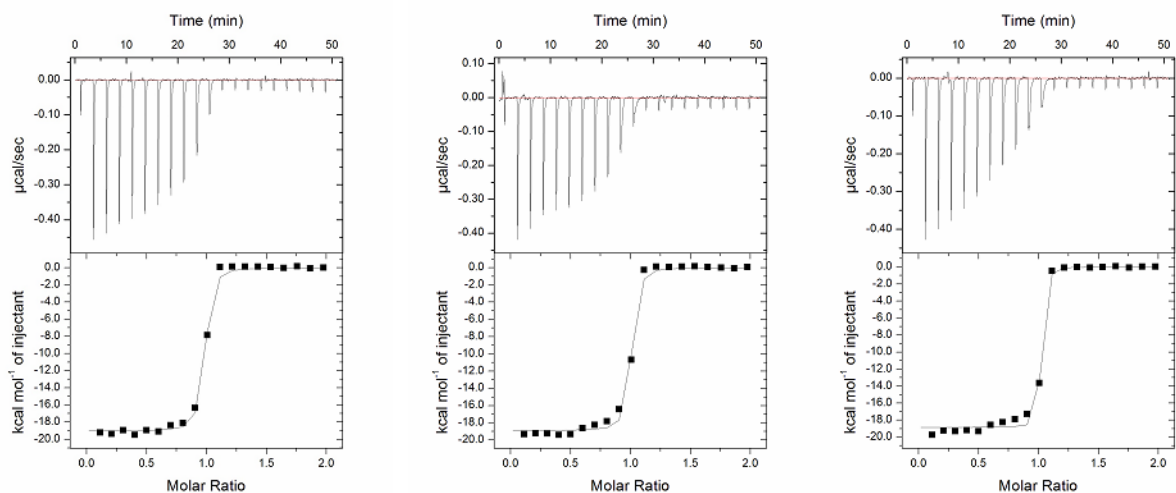**B**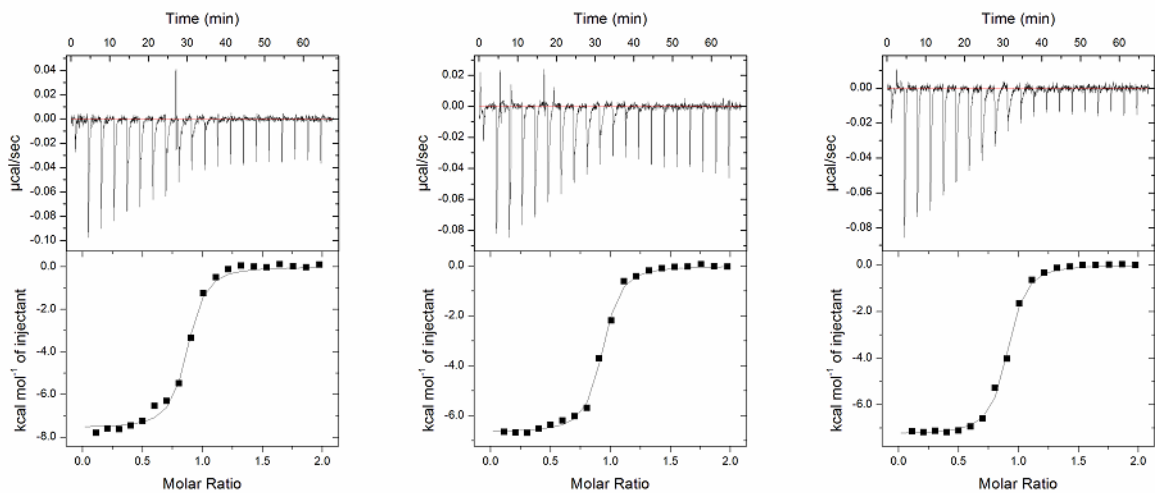

**Figure S1:** Raw isothermal titration calorimetry (ITC) data of Bio-AMS (**14**). A) Three independent direct binding experiments of Bio-AMS (100  $\mu\text{M}$ ) and *MtBPL* (10  $\mu\text{M}$ ). B) Three independent competitive experiments with Biotin (100  $\mu\text{M}$ ), Bio-AMS (100  $\mu\text{M}$ ) and *MtBPL* (10  $\mu\text{M}$ ).

**A**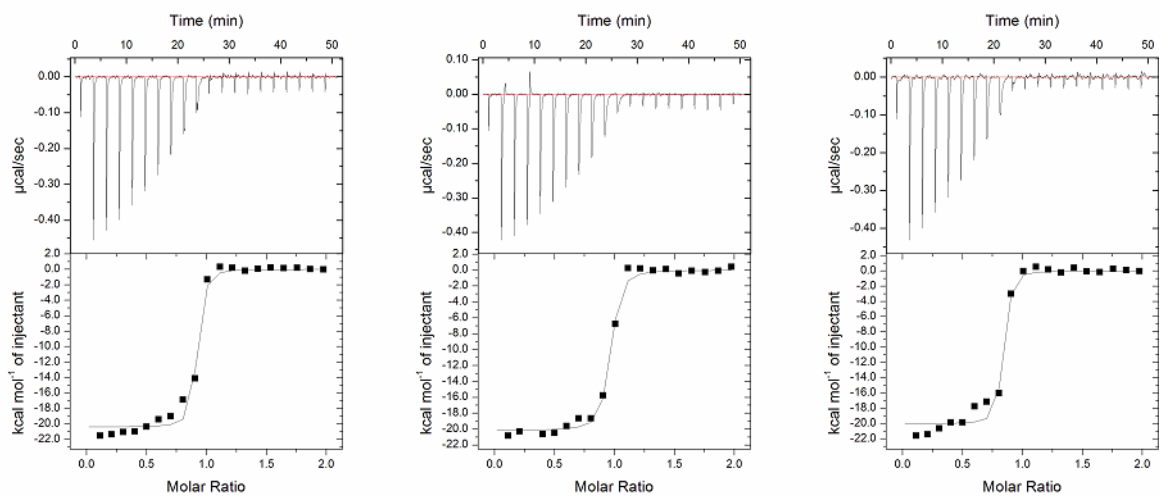**B**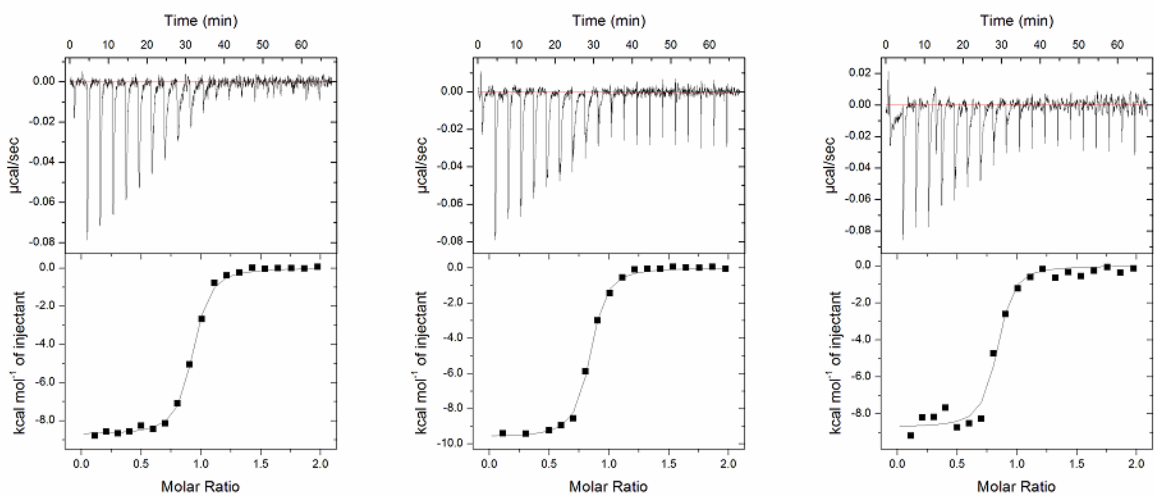

**Figure S2:** Raw isothermal titration calorimetry (ITC) data of Carbocyclic-Bio-AMS (**28**). A) Three independent direct binding experiments of **28** (100  $\mu\text{M}$ ) and *Mt*BPL (10  $\mu\text{M}$ ). B) Three independent competitive experiments with Biotin (100  $\mu\text{M}$ ), **28** (100  $\mu\text{M}$ ) and *Mt*BPL (10  $\mu\text{M}$ ).

**A**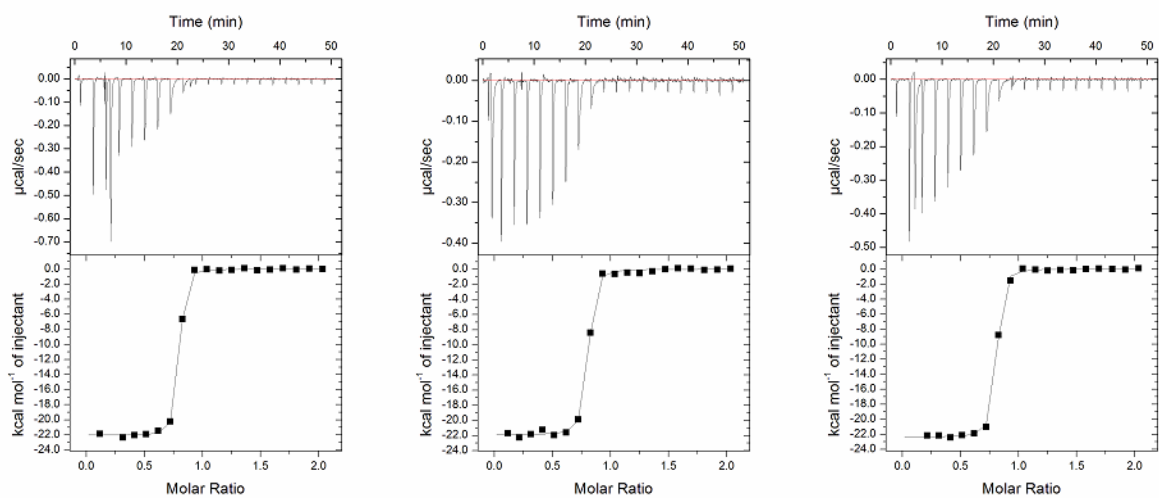**B**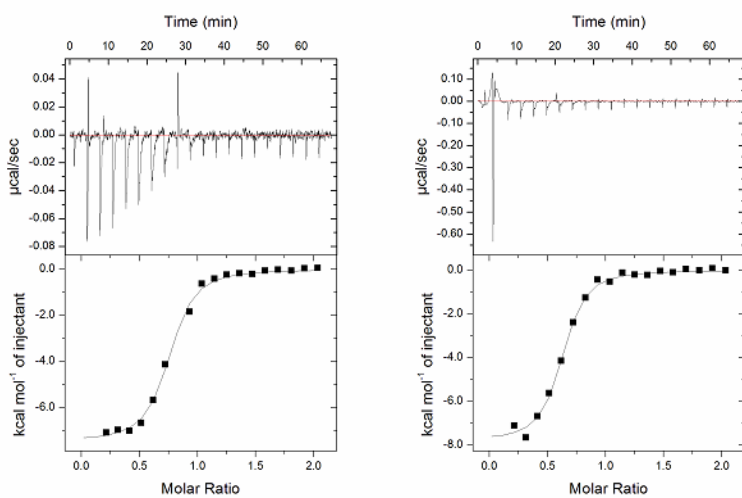

**Figure S3:** Raw isothermal titration calorimetry (ITC) data of Cyclopentyl Bio-AMS (**34**). A) Three independent direct binding experiments of **34** (100  $\mu\text{M}$ ) and *Mt*BPL (10  $\mu\text{M}$ ). B) Three independent competitive experiments with Biotin (100  $\mu\text{M}$ ), **34** (100  $\mu\text{M}$ ) and *Mt*BPL (10  $\mu\text{M}$ ).

A

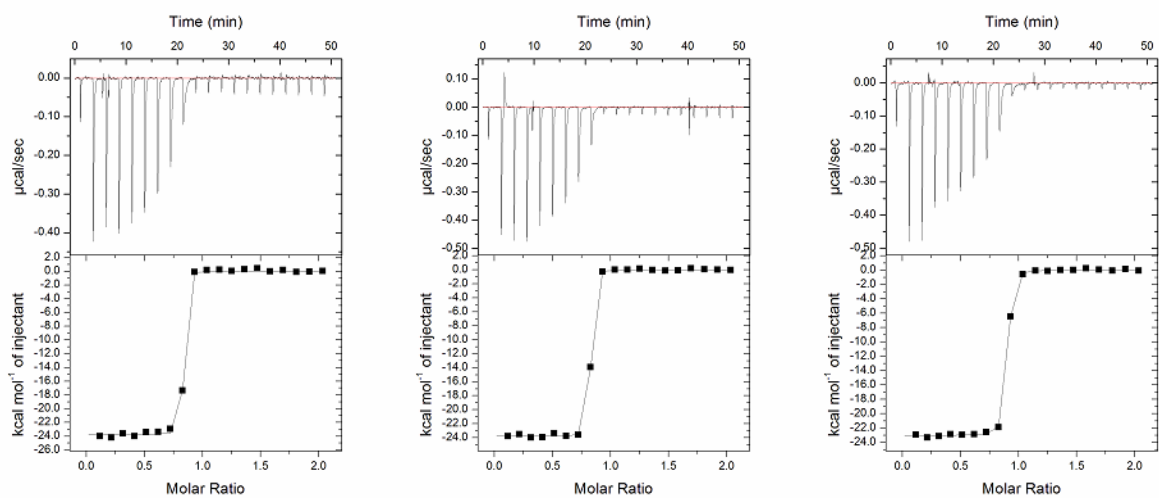

B

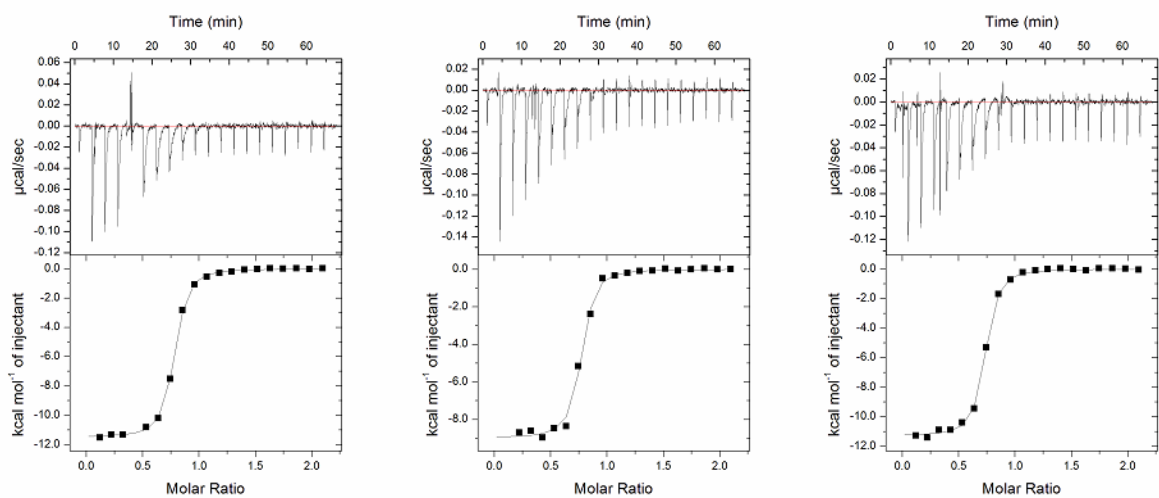

**Figure S4:** Raw isothermal titration calorimetry (ITC) data of Cyclopentyl Bio-AMS (**36**). A) Three independent direct binding experiments of **36** (100  $\mu\text{M}$ ) and *Mt*BPL (10  $\mu\text{M}$ ). B) Three independent competitive experiments with Biotin (100  $\mu\text{M}$ ), **36** (100  $\mu\text{M}$ ) and *Mt*BPL (10  $\mu\text{M}$ ).

**A**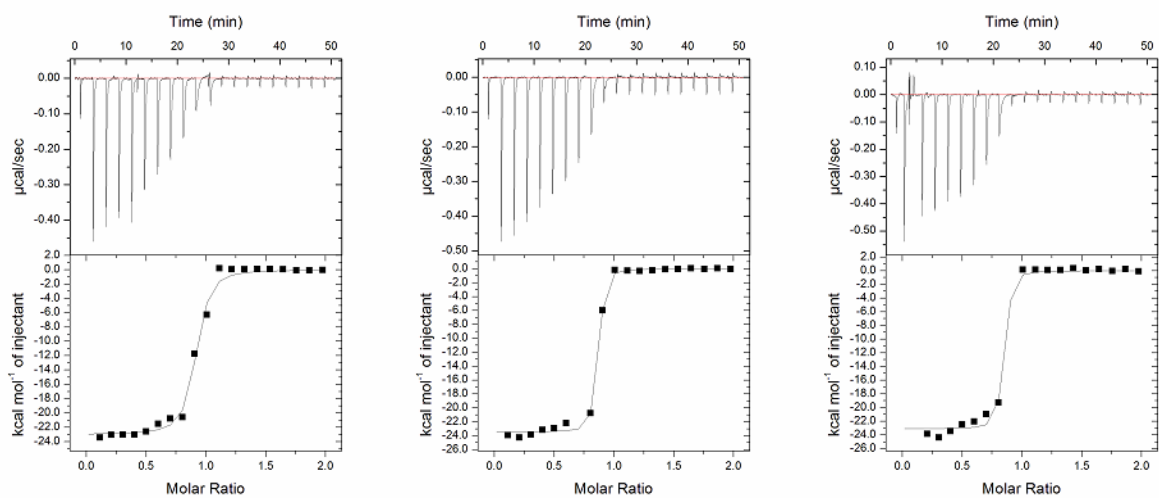**B**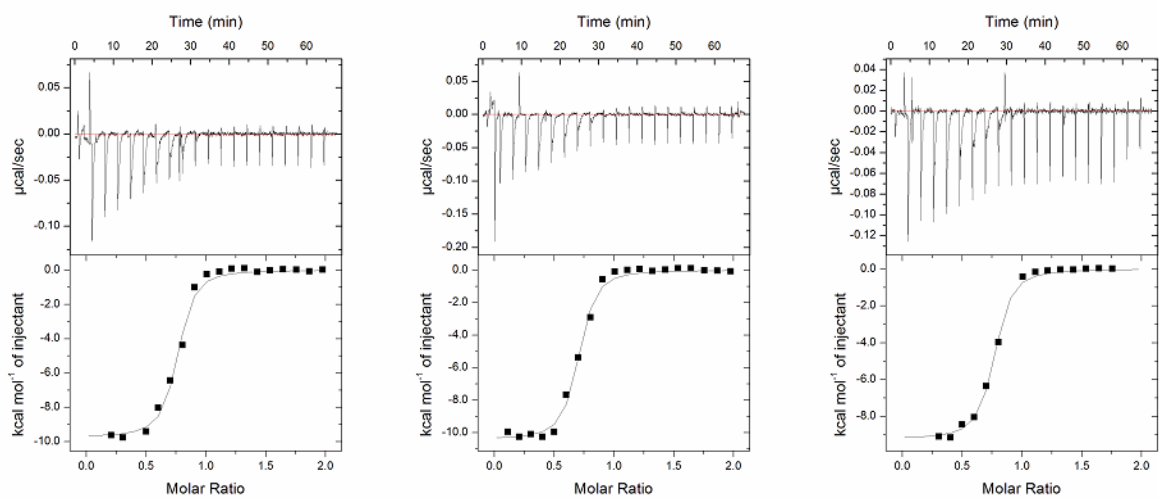

**Figure S5:** Raw isothermal titration calorimetry (ITC) data of 2'- $\alpha$ -Azido-2'-deoxy-Bio-AMS (**46**). A) Three independent direct binding experiments of **46** (100  $\mu$ M) and *Mt*BPL (10  $\mu$ M). B) Three independent competitive experiments with Biotin (100  $\mu$ M), **46** (100  $\mu$ M) and *Mt*BPL (10  $\mu$ M).

A

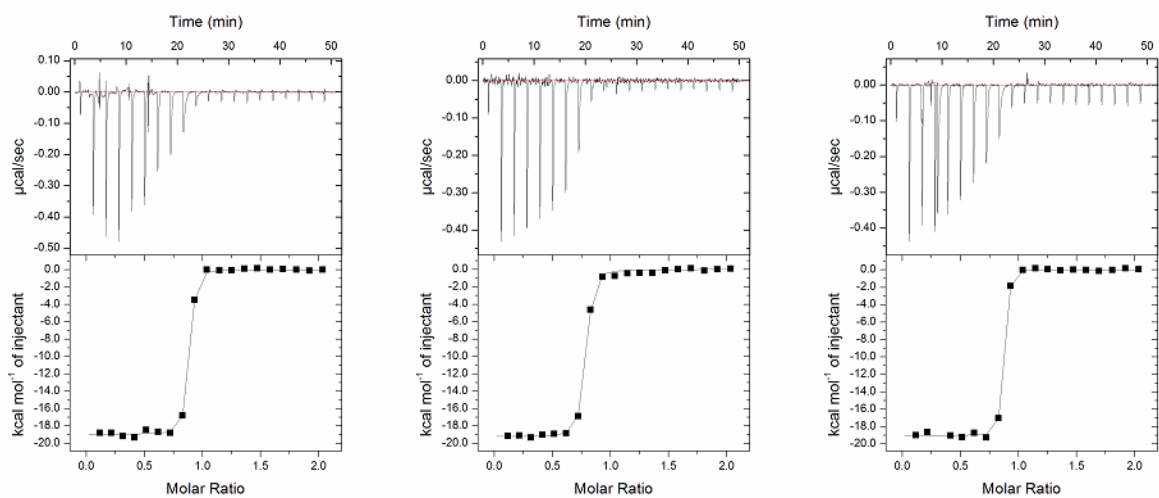

B

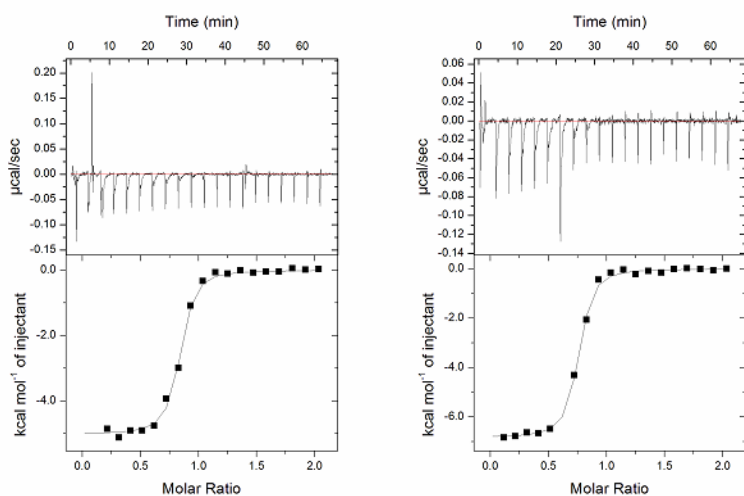

**Figure S6:** Raw isothermal titration calorimetry (ITC) data of 2'- $\alpha$ -Amino-2'-deoxy-Bio-AMS (**47**). A) Three independent direct binding experiments of **47** (100  $\mu\text{M}$ ) and *Mt*BPL (10  $\mu\text{M}$ ). B) Two independent competitive experiments with Biotin (100  $\mu\text{M}$ ), **47** (100  $\mu\text{M}$ ) and *Mt*BPL (10  $\mu\text{M}$ ).

**A**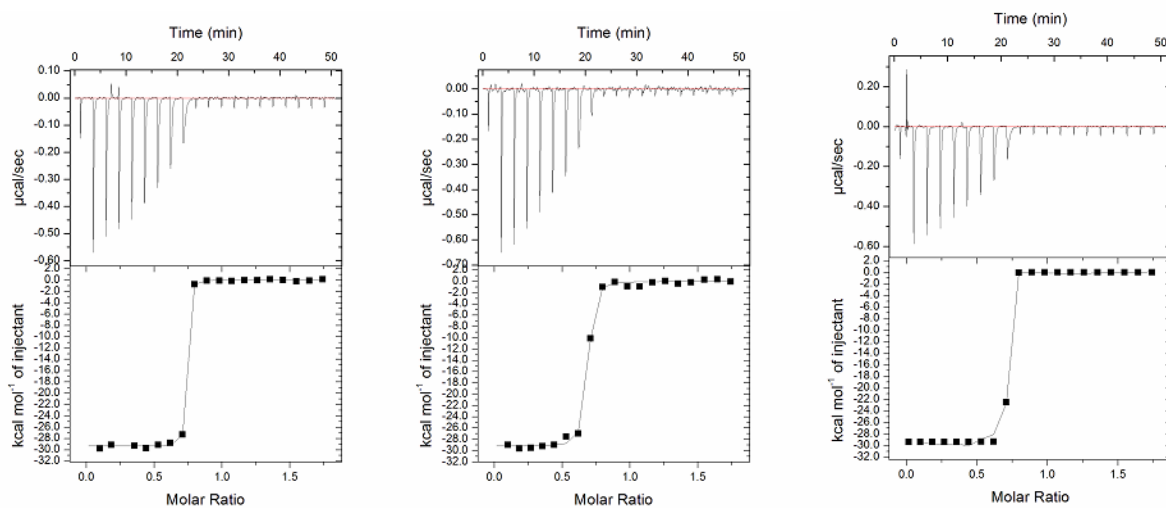**B**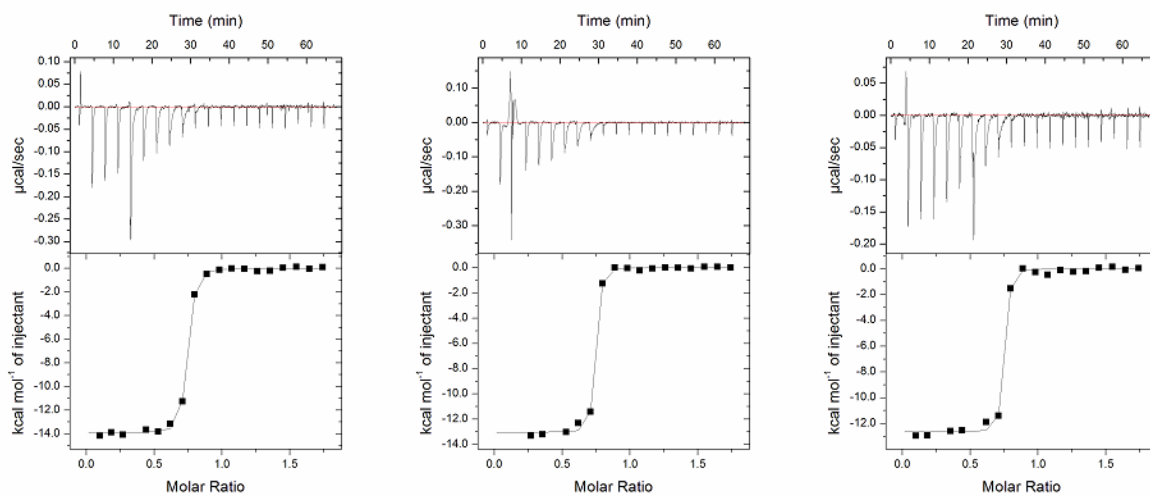

**Figure S7:** Raw isothermal titration calorimetry (ITC) data of 2'- $\beta$ -azido-2'-deoxy-Bio-AMS (**57**). A) Three independent direct binding experiments of **57** (100  $\mu\text{M}$ ) and *Mt*BPL (10  $\mu\text{M}$ ). B) Three independent competitive experiments with Biotin (100  $\mu\text{M}$ ), **57** (100  $\mu\text{M}$ ) and *Mt*BPL (10  $\mu\text{M}$ ).



**A**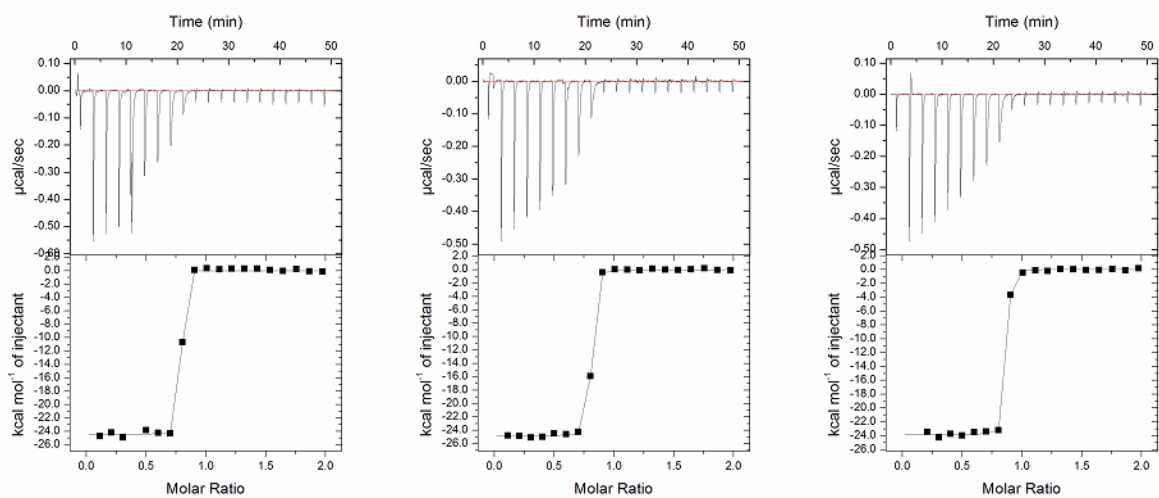**B**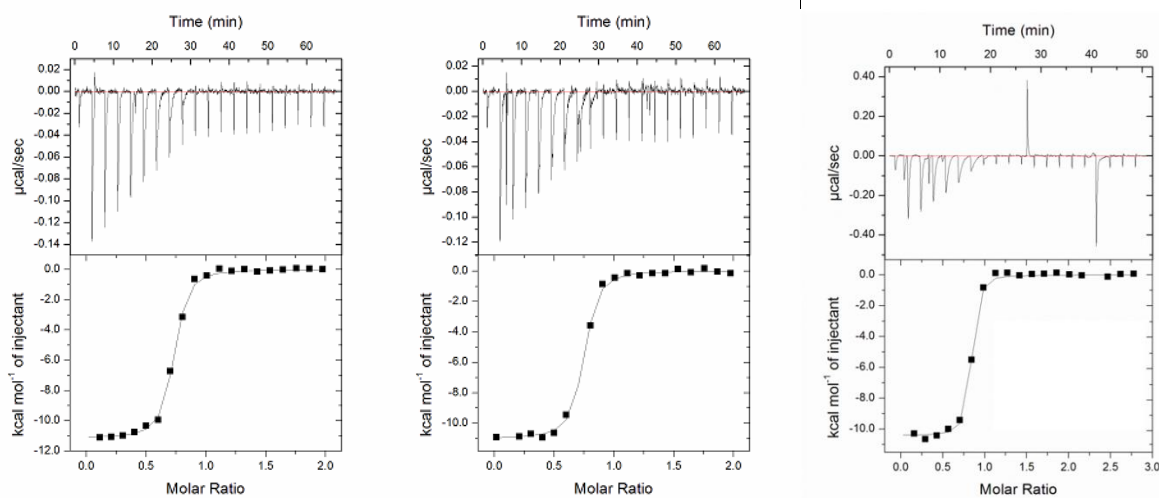

**Figure S8:** Raw isothermal titration calorimetry (ITC) data of 2'-Deoxy-2'- $\alpha$ -fluoro-Bio-AMS (**63**). A) Three independent direct binding experiments of **63** (100  $\mu\text{M}$ ) and *Mt*BPL (10  $\mu\text{M}$ ). B) Three independent competitive experiments with Biotin (100  $\mu\text{M}$ ), **63** (100  $\mu\text{M}$ ) and *Mt*BPL (10  $\mu\text{M}$ ).

**A**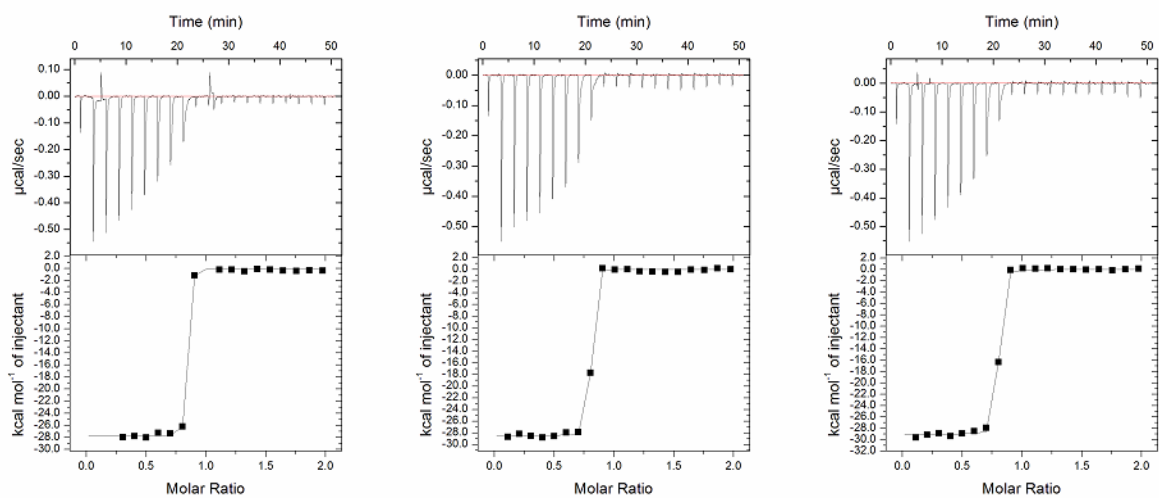**B**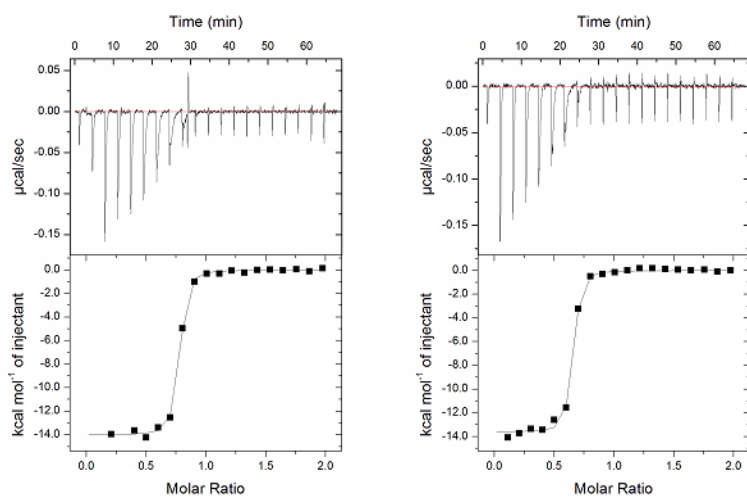

**Figure S9:** Raw isothermal titration calorimetry (ITC) data of 2'-Deoxy-2'- $\beta$ -fluoro-Bio-AMS (**69**). A) Three independent direct binding experiments of **69** (100  $\mu\text{M}$ ) and *MtBPL* (10  $\mu\text{M}$ ). B) Two independent competitive experiments with Biotin (100  $\mu\text{M}$ ), **69** (100  $\mu\text{M}$ ) and *MtBPL* (10  $\mu\text{M}$ ).

**A**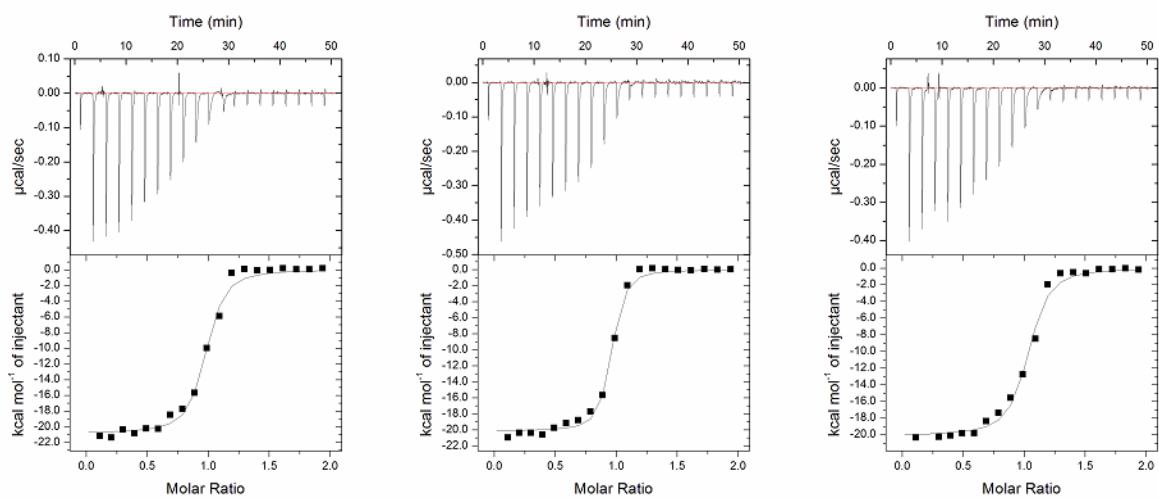**B**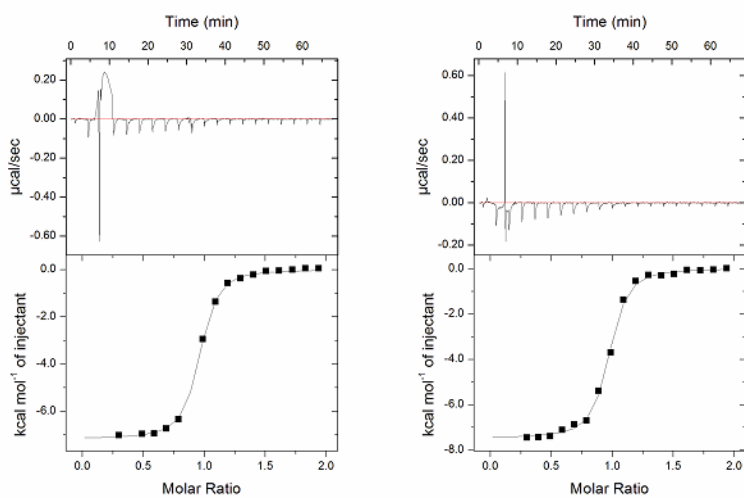

**Figure S10:** Raw isothermal titration calorimetry (ITC) data of C-2'- $\alpha$ -methyl-Bio-AMS (**73**). A) Three independent direct binding experiments of **73** (100  $\mu\text{M}$ ) and *Mt*BPL (10  $\mu\text{M}$ ). B) Two independent competitive experiments with Biotin (100  $\mu\text{M}$ ), **73** (100  $\mu\text{M}$ ) and *Mt*BPL (10  $\mu\text{M}$ ).

A

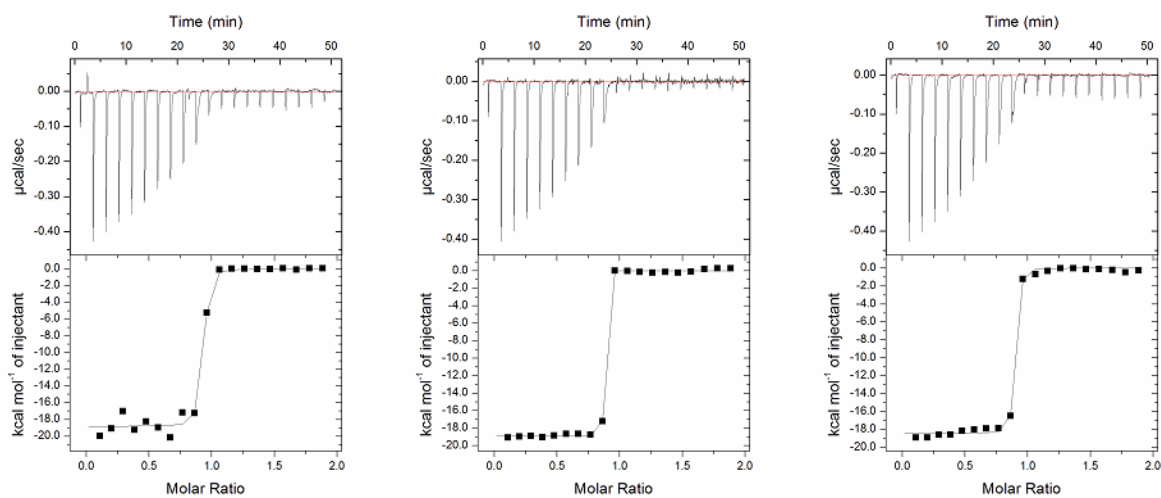

B

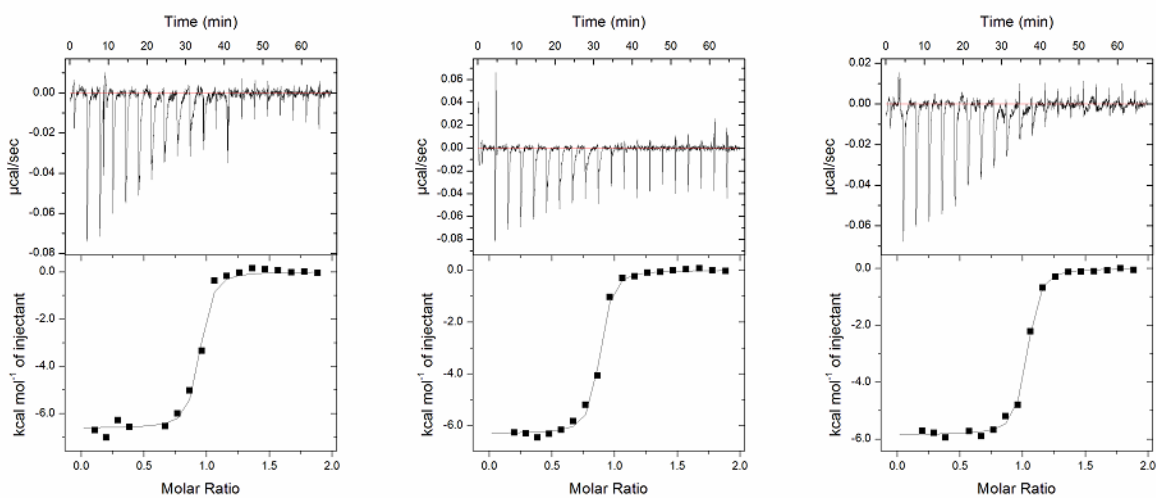

**Figure S11:** Raw isothermal titration calorimetry (ITC) data of Morpholinyl-Bio-AMS (**82**). A) Three independent direct binding experiments of **82** (100  $\mu\text{M}$ ) and *Mt*BPL (10  $\mu\text{M}$ ). B) Three independent competitive experiments with Biotin (100  $\mu\text{M}$ ), **82** (100  $\mu\text{M}$ ) and *Mt*BPL (10  $\mu\text{M}$ ).

A

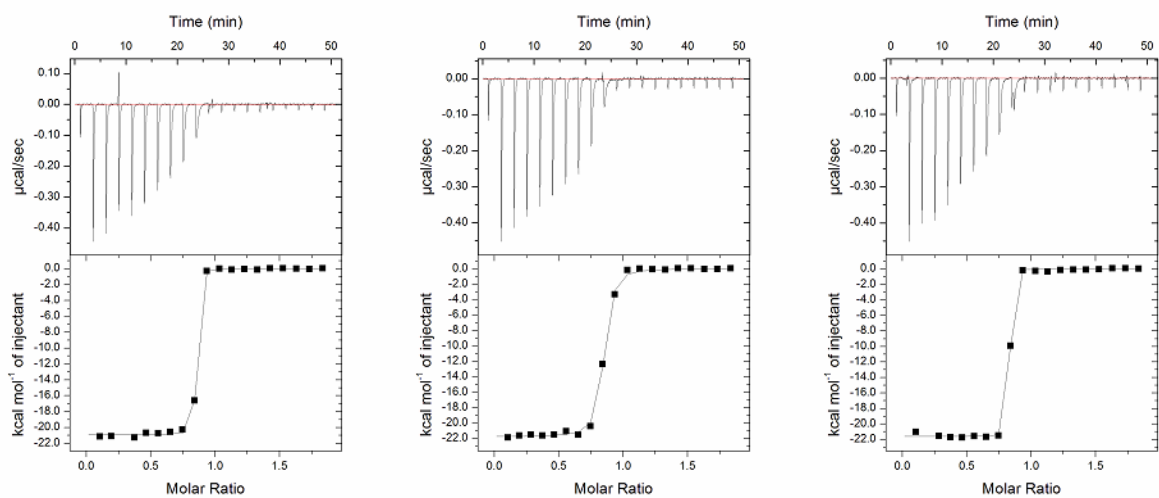

B

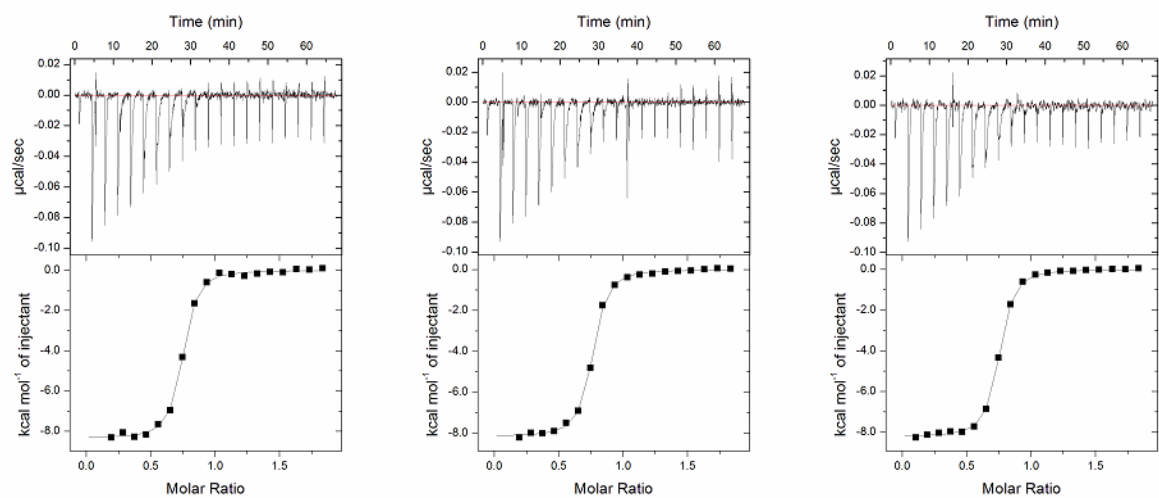

**Figure S12:** Raw isothermal titration calorimetry (ITC) data of 3'-Deoxy-Bio-AMS (**87**). A) Three independent direct binding experiments of **87** (100  $\mu\text{M}$ ) and *Mt*BPL (10  $\mu\text{M}$ ). B) Three independent competitive experiments with Biotin (100  $\mu\text{M}$ ), **87** (100  $\mu\text{M}$ ) and *Mt*BPL (10  $\mu\text{M}$ ).

**A**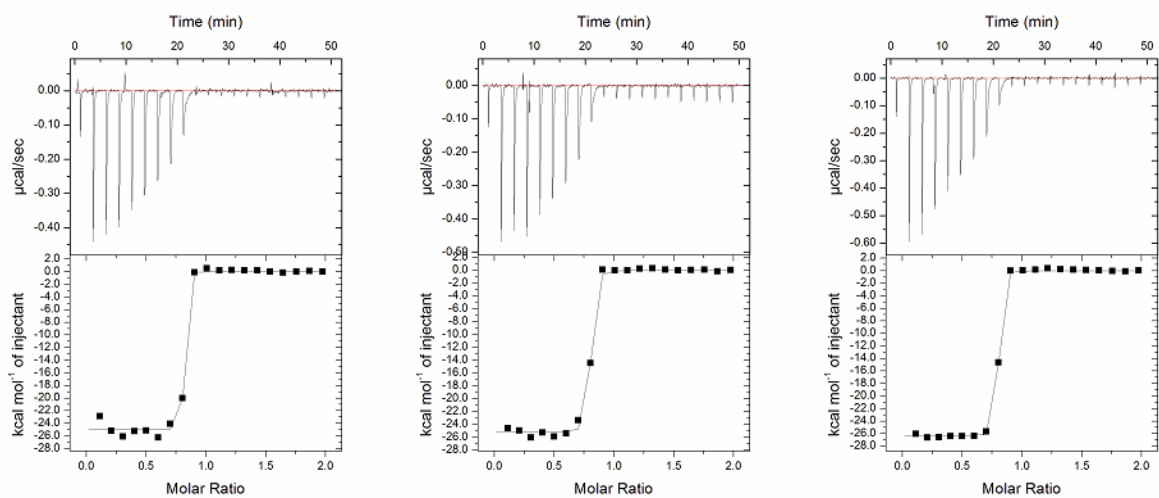**B**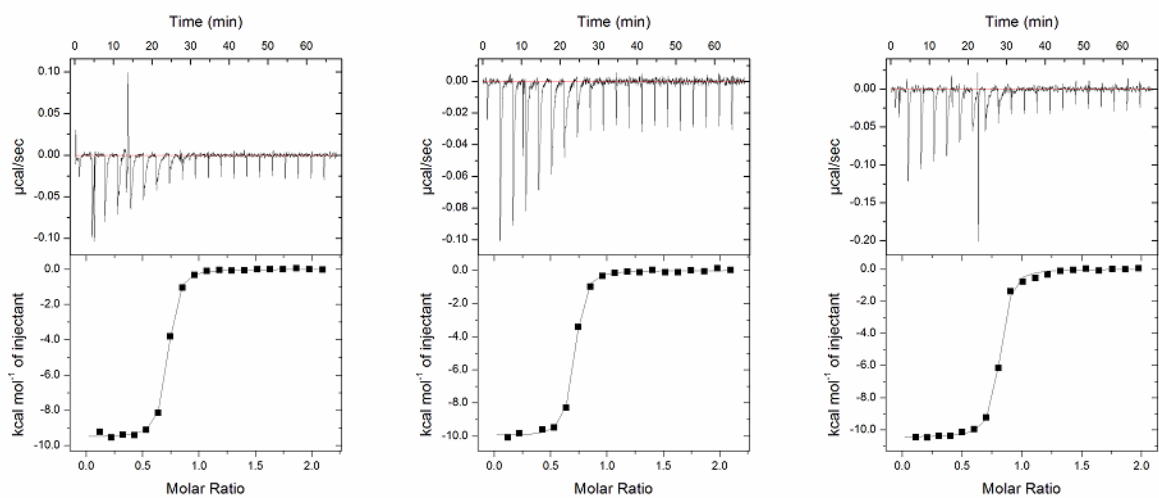

**Figure S13:** Raw isothermal titration calorimetry (ITC) data of Acyclo-Bio-AMS (**90**). A) Three independent direct binding experiments of **90** ( $100 \mu\text{M}$ ) and *Mt*BPL ( $10 \mu\text{M}$ ). B) Three independent competitive experiments with Biotin ( $100 \mu\text{M}$ ), **90** ( $100 \mu\text{M}$ ) and *Mt*BPL ( $10 \mu\text{M}$ ).

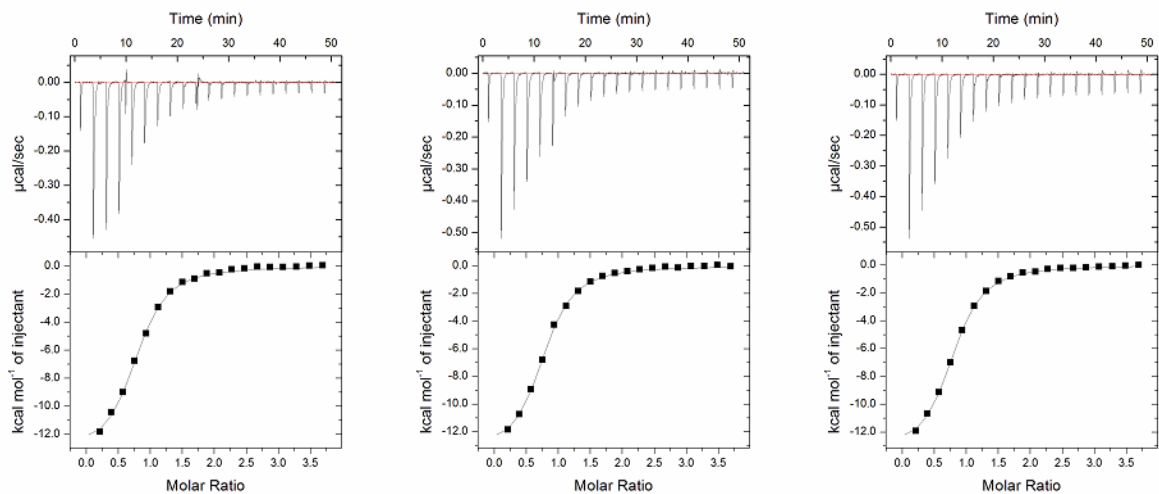

**Figure S14:** Raw isothermal titration calorimetry (ITC) data of biotin (**6**); three independent direct binding experiments of **6** ( $300 \mu\text{M}$ ) and *MtBPL* ( $10 \mu\text{M}$ ).

**Table S1.** Raw isothermal titration calorimetry (ITC) data including:  $n$  value (direct titration), association constant in the presence of 100  $\mu\text{M}$  Biotin ( $K_A^{app}$ ), association constant when corrected using equation 1 ( $K_A$ ), dissociation constant ( $K_D$ ), enthalpy ( $\Delta H$ ), Gibbs' free energy ( $\Delta G$ ), and entropy ( $-T\Delta S$ ) for each analog indicating each separate trial.

| Compound | Trial | $n$   | $K_A^{app}$ ( $\text{M}^{-1}$ ) | $K_A$ ( $\text{M}^{-1}$ ) | $K_D$ (nM) | $\Delta H$ (kcal/mol) | $\Delta G$ (kcal/mol) | $-T\Delta S$ (kcal/mol) |
|----------|-------|-------|---------------------------------|---------------------------|------------|-----------------------|-----------------------|-------------------------|
|          | 1     | 0.940 | 1.49E+07                        | 1.10E+09                  | 0.909      | -19.06                | -12.335               | 6.72                    |
|          | 2     | 0.962 | 1.63E+07                        | 1.20E+09                  | 0.831      | -18.92                | -12.388               | 6.53                    |
|          | 3     | 0.982 | 1.58E+07                        | 1.17E+09                  | 0.857      | -18.85                | -12.370               | 6.48                    |
|          | 1     | 0.877 | 1.80E+07                        | 1.33E+09                  | 0.752      | -20.39                | -12.447               | 7.94                    |
|          | 2     | 0.921 | 1.79E+07                        | 1.32E+09                  | 0.756      | -20.17                | -12.444               | 7.73                    |
|          | 3     | 0.796 | 1.80E+07                        | 1.33E+09                  | 0.752      | -20.03                | -12.447               | 7.58                    |
|          | 1     | 0.759 | 6.21E+06                        | 4.59E+08                  | 2.18       | -21.92                | -11.816               | 10.10                   |
|          | 2     | 0.748 | 6.16E+06                        | 4.55E+08                  | 2.20       | -22.04                | -11.812               | 10.23                   |
|          | 3     | 0.806 | 6.63E+06                        | 4.90E+08                  | 2.04       | -22.38                | -11.855               | 10.52                   |
|          | 1     | 0.785 | 2.50E+07                        | 1.85E+09                  | 0.542      | -23.75                | -12.641               | 11.11                   |
|          | 2     | 0.800 | 2.48E+07                        | 1.83E+09                  | 0.546      | -23.72                | -12.637               | 11.08                   |
|          | 3     | 0.853 | 2.54E+07                        | 1.88E+09                  | 0.533      | -23.05                | -12.651               | 10.40                   |
|          | 1     | 0.820 | 1.39E+07                        | 1.03E+09                  | 0.974      | -23.47                | -12.294               | 11.18                   |
|          | 2     | 0.873 | 1.53E+07                        | 1.13E+09                  | 0.885      | -23.01                | -12.351               | 10.66                   |
|          | 3     | 0.805 | 1.44E+07                        | 1.06E+09                  | 0.940      | -23.11                | -12.320               | 10.80                   |
|          | 1     | 0.737 | 2.20E+07                        | 1.63E+09                  | 0.615      | -18.90                | -12.566               | 6.65                    |
|          | 2     | 0.836 | 2.12E+07                        | 1.57E+09                  | 0.639      | -18.82                | -12.544               | 6.39                    |
|          | 3     | 0.827 | -                               | -                         | -          | -18.82                | -                     | -                       |
|          | 1     | 0.645 | 4.89E+08                        | 3.61E+10                  | 0.0277     | -29.21                | -14.403               | 14.81                   |
|          | 2     | 0.704 | 4.97E+08                        | 3.67E+10                  | 0.0272     | -29.35                | -14.413               | 14.94                   |
|          | 3     | 0.687 | -                               | -                         | -          | -29.42                | -                     | -                       |
|          | 1     | 0.768 | 2.21E+07                        | 1.63E+09                  | 0.613      | -24.80                | -12.569               | 12.23                   |
|          | 2     | 0.747 | 2.14E+07                        | 1.58E+09                  | 0.633      | -24.39                | -12.550               | 11.84                   |
|          | 3     | 0.817 | 2.27E+07                        | 1.68E+09                  | 0.596      | -23.77                | -12.585               | 11.17                   |
|          | 1     | 0.765 | 8.87E+07                        | 6.55E+09                  | 0.153      | -28.43                | -13.392               | 15.04                   |
|          | 2     | 0.802 | 8.87E+07                        | 6.55E+09                  | 0.153      | -27.76                | -13.392               | 14.37                   |
|          | 3     | 0.860 | -                               | -                         | -          | -29.05                | -                     | -                       |
|          | 1     | 0.918 | 1.77E+07                        | 1.31E+09                  | 0.765      | -20.13                | -12.437               | 7.69                    |
|          | 2     | 0.940 | 1.75E+07                        | 1.29E+09                  | 0.774      | -20.79                | -12.430               | 8.36                    |
|          | 3     | 0.994 | -                               | -                         | -          | -20.08                | -                     | -                       |
|          | 1     | 0.855 | 3.98E+07                        | 2.94E+09                  | 0.34       | -18.90                | -12.917               | 5.98                    |
|          | 2     | 0.885 | 4.06E+07                        | 3.00E+09                  | 0.333      | -18.82                | -12.929               | 5.89                    |
|          | 3     | 0.885 | 4.45E+07                        | 3.35E+09                  | 0.298      | -18.82                | -12.995               | 5.82                    |
|          | 1     | 0.810 | 2.26E+07                        | 1.67E+09                  | 0.599      | -21.76                | -12.581               | 9.17                    |
|          | 2     | 0.823 | 2.31E+07                        | 1.71E+09                  | 0.586      | -20.87                | -12.595               | 8.27                    |
|          | 3     | 0.790 | 2.27E+07                        | 1.68E+09                  | 0.596      | -21.60                | -12.584               | 9.01                    |
|          | 1     | 0.760 | 4.25E+07                        | 3.14E+09                  | 0.319      | -25.22                | -12.956               | 12.26                   |
|          | 2     | 0.784 | 4.32E+07                        | 3.19E+09                  | 0.313      | -25.02                | -12.965               | 12.05                   |
|          | 3     | 0.759 | 4.33E+07                        | 3.20E+09                  | 0.313      | -26.37                | -12.967               | 13.40                   |



**Table S2.** Summary of Crystallographic Data

| Inhibitor                                                                         | 36                                                                                | 46*                                                                                | 57*                                                                                 |
|-----------------------------------------------------------------------------------|-----------------------------------------------------------------------------------|------------------------------------------------------------------------------------|-------------------------------------------------------------------------------------|
| Final $1.5\sigma$ $2F_o-F_c$ density (blue)<br>$-3\sigma$ $F_o-F_c$ density (red) | 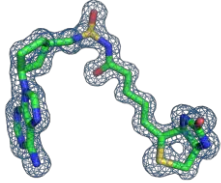 |  |  |
| PDB ID code                                                                       | 4xtv                                                                              | 4xtw                                                                               | 4xtx                                                                                |
| Source                                                                            | APS 17 ID                                                                         | IMCA 17-ID                                                                         | IMCA 17-ID                                                                          |
| Resolution (Å)                                                                    | 1.45                                                                              | 2.3                                                                                | 2.3                                                                                 |
| Space group                                                                       | P 2 <sub>1</sub> 2 <sub>1</sub> 2 <sub>1</sub>                                    | P 2 <sub>1</sub> 2 <sub>1</sub> 2 <sub>1</sub>                                     | P 2 <sub>1</sub> 2 <sub>1</sub> 2 <sub>1</sub>                                      |
| Cell axis length (Å)                                                              | 63.896<br>68.937<br>115.713                                                       | 63.076<br>68.939<br>115.094                                                        | 63.367<br>68.841<br>114.452                                                         |
| <b>Data Processing</b>                                                            | Auto-Proc                                                                         | Auto-Proc                                                                          | Auto-Proc                                                                           |
| Resolution range (Å)<br>(high shell)                                              | 115.71-1.45<br>(1.455-1.450)                                                      | 115.09-2.300<br>(2.308-2.300)                                                      | 114.45-2.30<br>(2.308-2.300)                                                        |
| Observ. measured<br>(high shell)                                                  | 585195<br>(5893)                                                                  | 148467<br>(1477)                                                                   | 146421<br>(1444)                                                                    |
| Unique reflections<br>(high shell)                                                | 91151<br>(889)                                                                    | 22970<br>(219)                                                                     | 22929<br>(218)                                                                      |
| Average multiplicity<br>(high shell)                                              | 6.4<br>(6.6)                                                                      | 6.5<br>(6.7)                                                                       | 6.4<br>(6.6)                                                                        |
| Completeness (%)<br>(high shell)                                                  | 100.0<br>(99.9)                                                                   | 100.0<br>(100.0)                                                                   | 99.0<br>(99.5)                                                                      |
| $R_{merge}$<br>(high shell)                                                       | 0.040<br>(0.347)                                                                  | 0.080<br>(0.400)                                                                   | 0.076<br>(0.298)                                                                    |
| Mean $\langle I/\sigma \rangle$<br>(high shell)                                   | 26.8<br>(5.4)                                                                     | 17.5<br>(5.0)                                                                      | 19.0<br>(6.8)                                                                       |
| <b>Refinement statistics</b>                                                      |                                                                                   |                                                                                    |                                                                                     |
| Resolution range (Å)<br>(high shell)                                              | 36.415-1.450<br>(1.466-1.450)                                                     | 55.314-2.30<br>(2.404-2.30)                                                        | 58.99-2.30<br>(2.405-2.300)                                                         |
| Working reflections<br>(high shell)                                               | 91060<br>(2843)                                                                   | 22913<br>(2683)                                                                    | 22873<br>(2659)                                                                     |
| $R_{free}$ reflections<br>(high shell)                                            | 4562<br>(164)                                                                     | 1177<br>(126)                                                                      | 1169<br>(146)                                                                       |
| $R$ (%)<br>(high shell)                                                           | 0.1862<br>(0.2350)                                                                | 0.1848<br>(0.2335)                                                                 | 0.1895<br>(0.2350)                                                                  |
| $R_{free}$ (%)<br>(high shell)                                                    | 0.2056<br>(0.2745)                                                                | 0.2161<br>(0.3111)                                                                 | 0.2497<br>(0.2972)                                                                  |
| Non-hydrogen atoms                                                                | 4753                                                                              | 4120                                                                               | 4039                                                                                |
| Solvent waters                                                                    | 637                                                                               | 126                                                                                | 117                                                                                 |
| Mean $B$ -factors (Å <sup>2</sup> )                                               | 19.84                                                                             | 30.13                                                                              | 35.62                                                                               |
| Protein atoms                                                                     | 4040                                                                              | 3911                                                                               | 3939                                                                                |
| <b>RMS deviations From Ideal Geometry</b>                                         |                                                                                   |                                                                                    |                                                                                     |
| Bond lengths (Å)                                                                  | 0.003                                                                             | 0.003                                                                              | 0.002                                                                               |
| Bond angles (°)                                                                   | 0.976                                                                             | 0.834                                                                              | 0.842                                                                               |
| Ramachandran plot<br>outliers (%)                                                 | 0.2                                                                               | 0.2                                                                                | 0.4                                                                                 |
| MolProbity score                                                                  | 1.21                                                                              | 1.33                                                                               | 1.32                                                                                |

\* No density for azide.  $3\sigma$  (-) diff density envelopes current modeled position

**Table S2.** Summary of Crystallographic Data. Part 2

| Inhibitor                                                                          | 63                                                                                | 69                                                                                 | 73                                                                                  |
|------------------------------------------------------------------------------------|-----------------------------------------------------------------------------------|------------------------------------------------------------------------------------|-------------------------------------------------------------------------------------|
| Final $1.5\sigma$ $2F_o-F_c$ density (blue)<br>- $3\sigma$ $F_o-F_c$ density (red) | 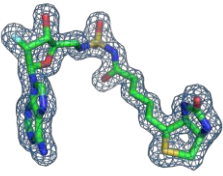 |  |  |
| PDB ID code                                                                        | 4xtx                                                                              | 4xtz                                                                               | 4xu0                                                                                |
| Source                                                                             | IMCA 17-ID                                                                        | IMCA 17-ID                                                                         | APS 17 ID                                                                           |
| Resolution (Å)                                                                     | 1.8                                                                               | 1.9                                                                                | 1.6                                                                                 |
| Space group                                                                        | P 2 <sub>1</sub> 2 <sub>1</sub> 2 <sub>1</sub>                                    | P 2 <sub>1</sub> 2 <sub>1</sub> 2 <sub>1</sub>                                     | P 2 <sub>1</sub> 2 <sub>1</sub> 2 <sub>1</sub>                                      |
| Cell axis length (Å)                                                               | 63.408<br>68.731<br>114.488                                                       | 63.449<br>68.875<br>115.581                                                        | 63.550<br>68.907<br>115.333                                                         |
| <b>Data Processing</b>                                                             | Auto-Proc                                                                         | Auto-Proc                                                                          | Auto-Proc                                                                           |
| Resolution range (Å)<br>(high shell)                                               | 114.5-1.80<br>(1.806-1.800)                                                       | 115.58-1.900<br>(1.906-1.900)                                                      | 115.33-1.600<br>(1.605-1.600)                                                       |
| Observ. measured<br>(high shell)                                                   | 304872<br>(3088)                                                                  | 263045<br>(2962)                                                                   | 440593<br>(4290)                                                                    |
| Unique reflections<br>(high shell)                                                 | 47014<br>(484)                                                                    | 40735<br>(433)                                                                     | 67262<br>(664)                                                                      |
| Average multiplicity<br>(high shell)                                               | 6.5<br>(6.4)                                                                      | 6.5<br>(6.8)                                                                       | 6.6<br>(6.5)                                                                        |
| Completeness (%)<br>(high shell)                                                   | 99.8<br>(98.6)                                                                    | 100.0<br>(100.0)                                                                   | 99.6<br>(99.8)                                                                      |
| $R_{merge}$<br>(high shell)                                                        | 0.055<br>(0.273)                                                                  | 0.073<br>(0.388)                                                                   | 0.052<br>(0.388)                                                                    |
| Mean $\langle I/\sigma \rangle$<br>(high shell)                                    | 21.6<br>(6.0)                                                                     | 19.6<br>(5.4)                                                                      | 22.3<br>(5.0)                                                                       |
| <b>Refinement statistics</b>                                                       |                                                                                   |                                                                                    |                                                                                     |
| Resolution range (Å)<br>(high shell)                                               | 36.14-1.80<br>(1.8368-1.8000)                                                     | 42.73-1.90<br>(1.94-1.90)                                                          | 43.32-1.600<br>(1.623-1.600)                                                        |
| Working reflections<br>(high shell)                                                | 46947<br>(2557)                                                                   | 40669<br>(2569)                                                                    | 67183<br>(2601)                                                                     |
| $R_{free}$ reflections<br>(high shell)                                             | 2376<br>(138)                                                                     | 2037<br>(119)                                                                      | 3405<br>(131)                                                                       |
| $R$ (%)<br>(high shell)                                                            | 0.1770<br>(0.1898)                                                                | 0.1832<br>(0.2059)                                                                 | 0.1952<br>(0.2307)                                                                  |
| $R_{free}$ (%)<br>(high shell)                                                     | 0.2116<br>(0.2563)                                                                | 0.2172<br>(0.2434)                                                                 | 0.2201<br>(0.2407)                                                                  |
| Non-hydrogen atoms                                                                 | 4340                                                                              | 4347                                                                               | 4642                                                                                |
| Solvent waters                                                                     | 332                                                                               | 328                                                                                | 617                                                                                 |
| Mean $B$ -factors (Å <sup>2</sup> )                                                | 21.94                                                                             | 21.19                                                                              | 21.15                                                                               |
| Protein atoms                                                                      | 4008                                                                              | 3944                                                                               | 3947                                                                                |
| <b>RMS deviations From Ideal Geometry</b>                                          |                                                                                   |                                                                                    |                                                                                     |
| Bond lengths (Å)                                                                   | 0.008                                                                             | 0.003                                                                              | 0.003                                                                               |
| Bond angles (°)                                                                    | 1.295                                                                             | 0.955                                                                              | 0.941                                                                               |
| Ramachandran plot outliers (%)                                                     | 0                                                                                 | 0.2                                                                                | 0                                                                                   |
| MolProbity score                                                                   | 1.13                                                                              | 1.26                                                                               | 1.25                                                                                |

**Table S2.** Summary of Crystallographic Data. Part 3

| Inhibitor                                                                                                                        | 82                                                                                | 87                                                                                 | 90                                                                                  |
|----------------------------------------------------------------------------------------------------------------------------------|-----------------------------------------------------------------------------------|------------------------------------------------------------------------------------|-------------------------------------------------------------------------------------|
| Final 1.5 $\sigma$ 2F <sub>o</sub> -F <sub>c</sub><br>density (blue)<br>-3 $\sigma$ F <sub>o</sub> -F <sub>c</sub> density (red) | 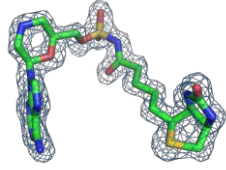 |  |  |
| PDB ID code                                                                                                                      | 4xu1                                                                              | 4xu2                                                                               | 4xu3                                                                                |
| Source                                                                                                                           | GMCAT-23-ID-B                                                                     | IMCA 17-ID                                                                         | ALS 4.2.2                                                                           |
| Resolution (Å)                                                                                                                   | 1.7                                                                               | 1.85                                                                               | 2.25                                                                                |
| Space group                                                                                                                      | P 2 <sub>1</sub> 2 <sub>1</sub> 2 <sub>1</sub>                                    | P 2 <sub>1</sub> 2 <sub>1</sub> 2 <sub>1</sub>                                     | P 2 <sub>1</sub> 2 <sub>1</sub> 2 <sub>1</sub>                                      |
| Cell axis length (Å)                                                                                                             | 63.219<br>71.38<br>113.702                                                        | 63.753<br>68.875<br>115.609                                                        | 63.326<br>68.730<br>114.093                                                         |
| <b>Data Processing</b>                                                                                                           | HKL2000                                                                           | Auto-Proc                                                                          | HKL2000                                                                             |
| Resolution range (Å)<br>(high shell)                                                                                             | 50.00-1.70<br>(1.73-1.70)                                                         | 115.61-1.85<br>(1.856-1.850)                                                       | 50.0-2.25<br>(2.29-2.25)                                                            |
| Observ. measured<br>(high shell)                                                                                                 | 419551                                                                            | 282718<br>(2943)                                                                   | 71806                                                                               |
| Unique reflections<br>(high shell)                                                                                               | 57349<br>(2803)                                                                   | 44260<br>(459)                                                                     | 23132<br>(1023)                                                                     |
| Average multiplicity<br>(high shell)                                                                                             | 7.3<br>(7.1)                                                                      | 6.4<br>(6.4)                                                                       | 3.1<br>(2.5)                                                                        |
| Completeness (%)<br>(high shell)                                                                                                 | 99.94<br>(99)                                                                     | 100.0<br>(99.8)                                                                    | 94.4<br>(84.7)                                                                      |
| $R_{merge}$<br>(high shell)                                                                                                      | 0.080<br>(0.410)                                                                  | 0.055<br>(0.334)                                                                   | 0.043<br>(0.257)                                                                    |
| Mean $\langle I/\sigma \rangle$<br>(high shell)                                                                                  | 24.7<br>(5.3)                                                                     | 21.9<br>(5.2)                                                                      | 12.3<br>(1.47)                                                                      |
| <b>Refinement statistics</b>                                                                                                     |                                                                                   |                                                                                    |                                                                                     |
| Resolution range (Å)<br>(high shell)                                                                                             | 30.45-1.70<br>(1.728-1.700)                                                       | 36.37-1.85<br>(1.890-1.850)                                                        | 31.66-2.24<br>(2.335-2.250)                                                         |
| Working reflections<br>(high shell)                                                                                              | 54370<br>(2538)                                                                   | 44191<br>(2607)                                                                    | 23108<br>(2165)                                                                     |
| $R_{free}$ reflections<br>(high shell)                                                                                           | 2905<br>(113)                                                                     | 2227<br>(122)                                                                      | 1198<br>(120)                                                                       |
| $R$ (%)<br>(high shell)                                                                                                          | 0.1709<br>(0.2022)                                                                | 0.1919<br>(0.2192)                                                                 | 0.1854<br>(0.2379)                                                                  |
| $R_{free}$ (%)<br>(high shell)                                                                                                   | 0.2028<br>(0.2531)                                                                | 0.2219<br>(0.2439)                                                                 | 0.2324<br>(0.2819)                                                                  |
| Non-hydrogen atoms                                                                                                               | 4678                                                                              | 4486                                                                               | 4171                                                                                |
| Solvent waters                                                                                                                   | 654                                                                               | 511                                                                                | 179                                                                                 |
| Mean $B$ -factors (Å <sup>2</sup> )                                                                                              | 20.31                                                                             | 24.51                                                                              | 38.02                                                                               |
| Protein atoms                                                                                                                    | 4024                                                                              | 3901                                                                               | 3923                                                                                |
| <b>RMS deviations From Ideal Geometry</b>                                                                                        |                                                                                   |                                                                                    |                                                                                     |
| Bond lengths (Å)                                                                                                                 | 0.007                                                                             | 0.002                                                                              | 0.002                                                                               |
| Bond angles (°)                                                                                                                  | 1.309                                                                             | 0.797                                                                              | 0.767                                                                               |
| Ramachandran plot<br>outliers (%)                                                                                                | 0.2                                                                               | 0.2                                                                                | 0.2                                                                                 |
| MolProbity score                                                                                                                 | 1.24                                                                              | 1.25                                                                               | 1.27                                                                                |
