# Supplementary material
Source: PubMed Central journal article supplement (PMC4667793)
Supplement: NIHMS740676-supplement-SI-2.pdf [file NIHMS740676-supplement-SI-2.pdf]

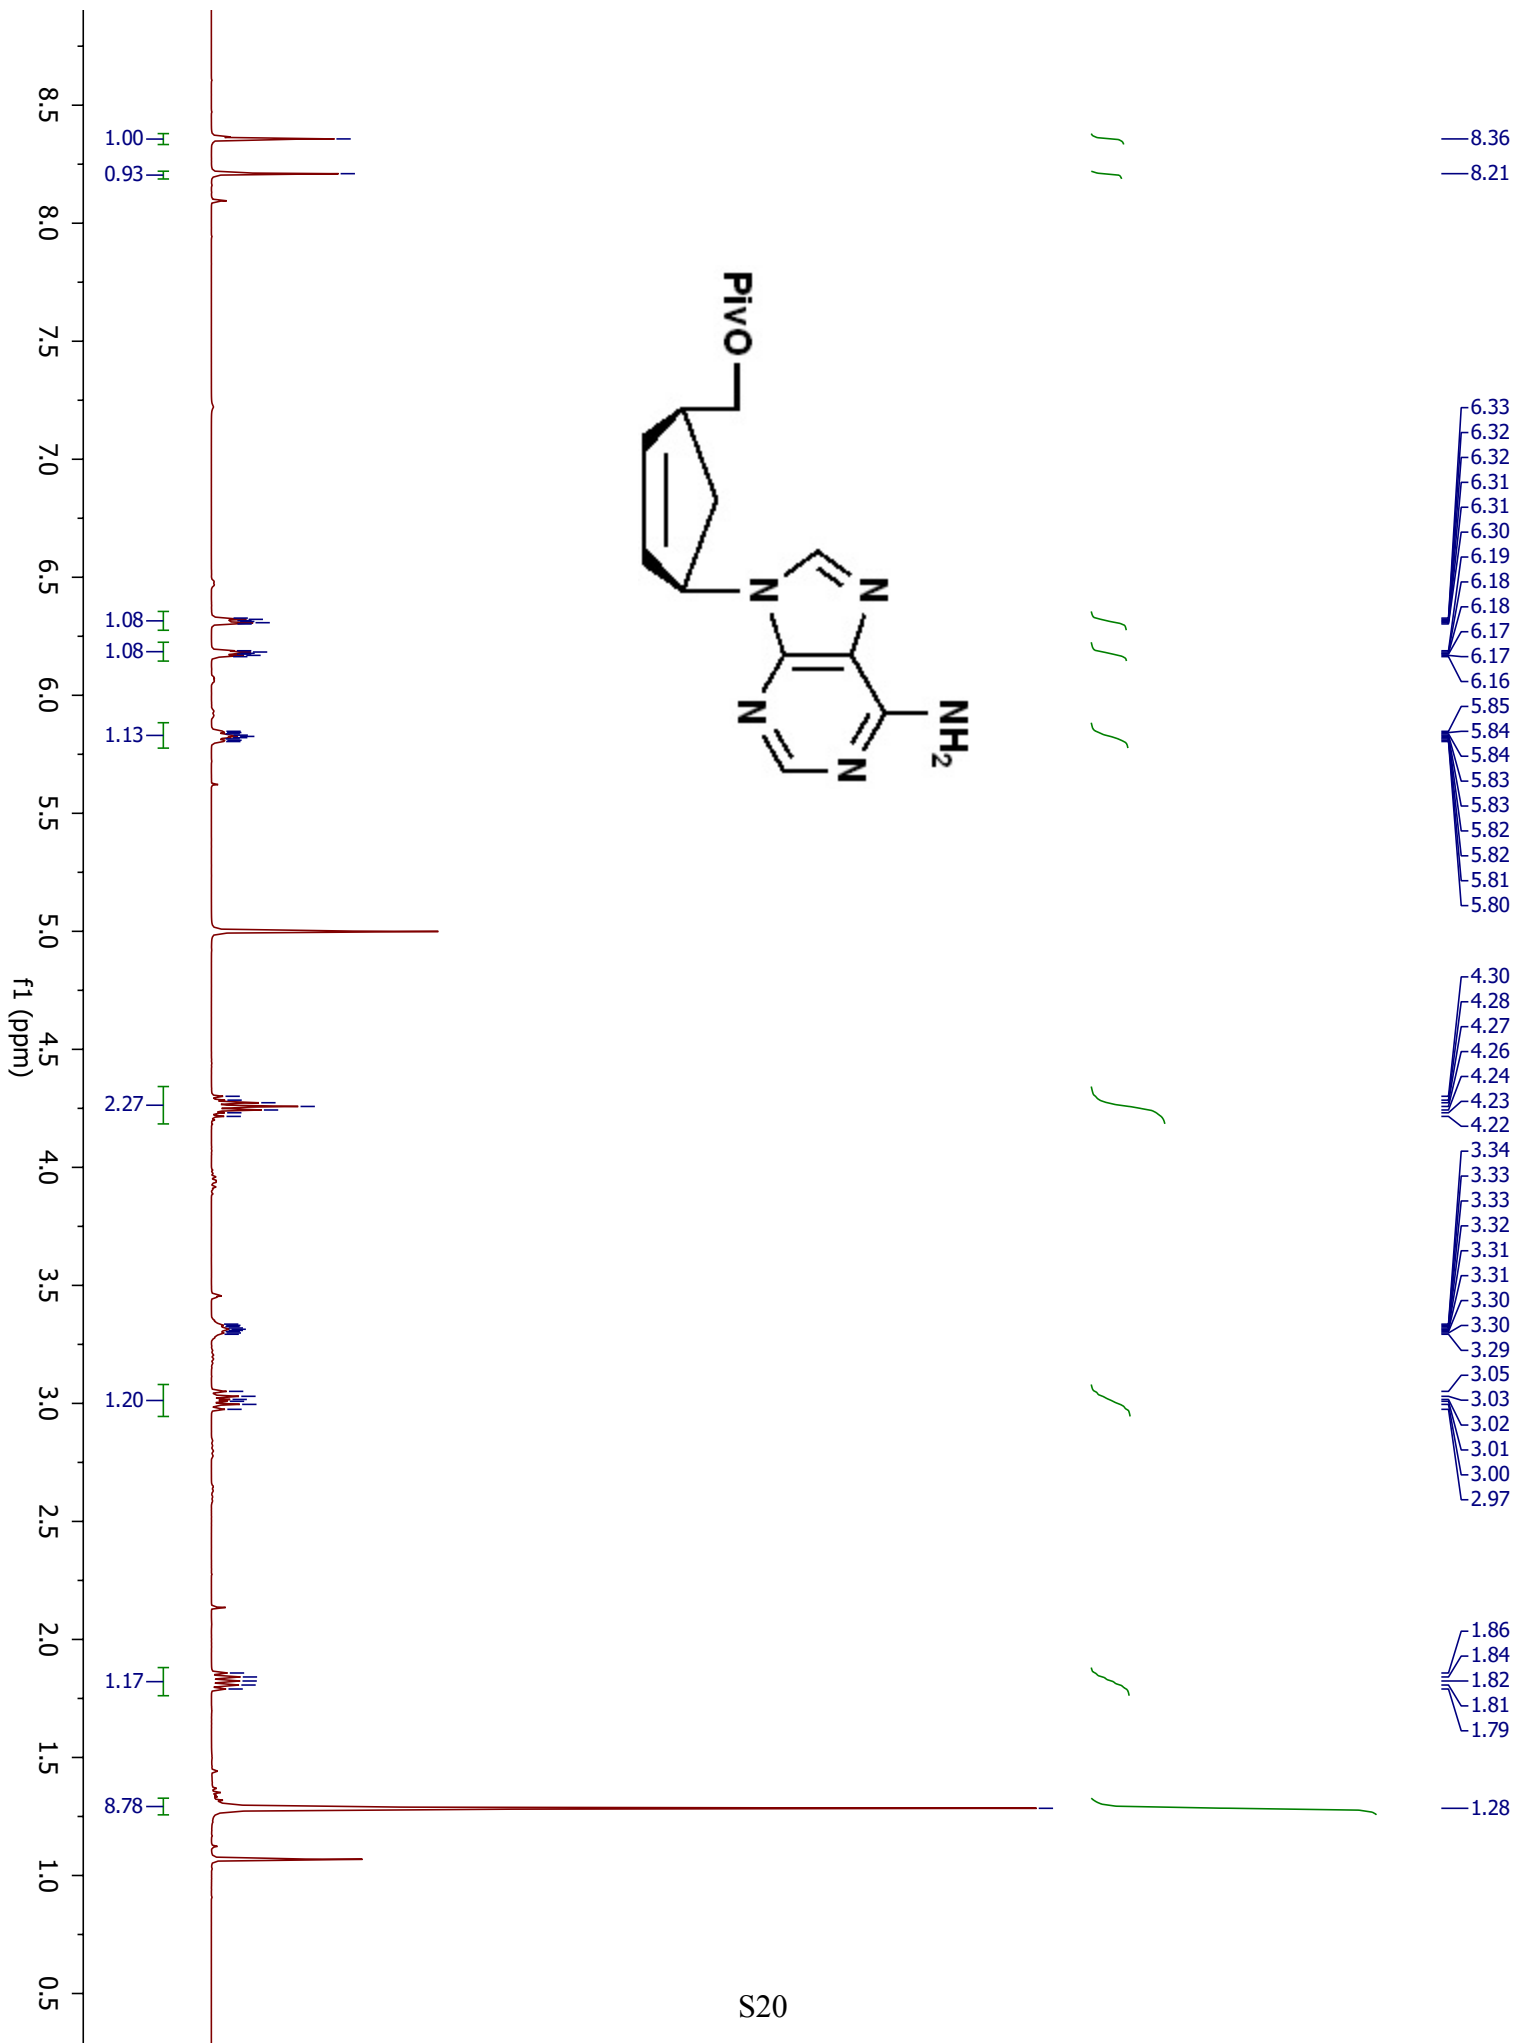

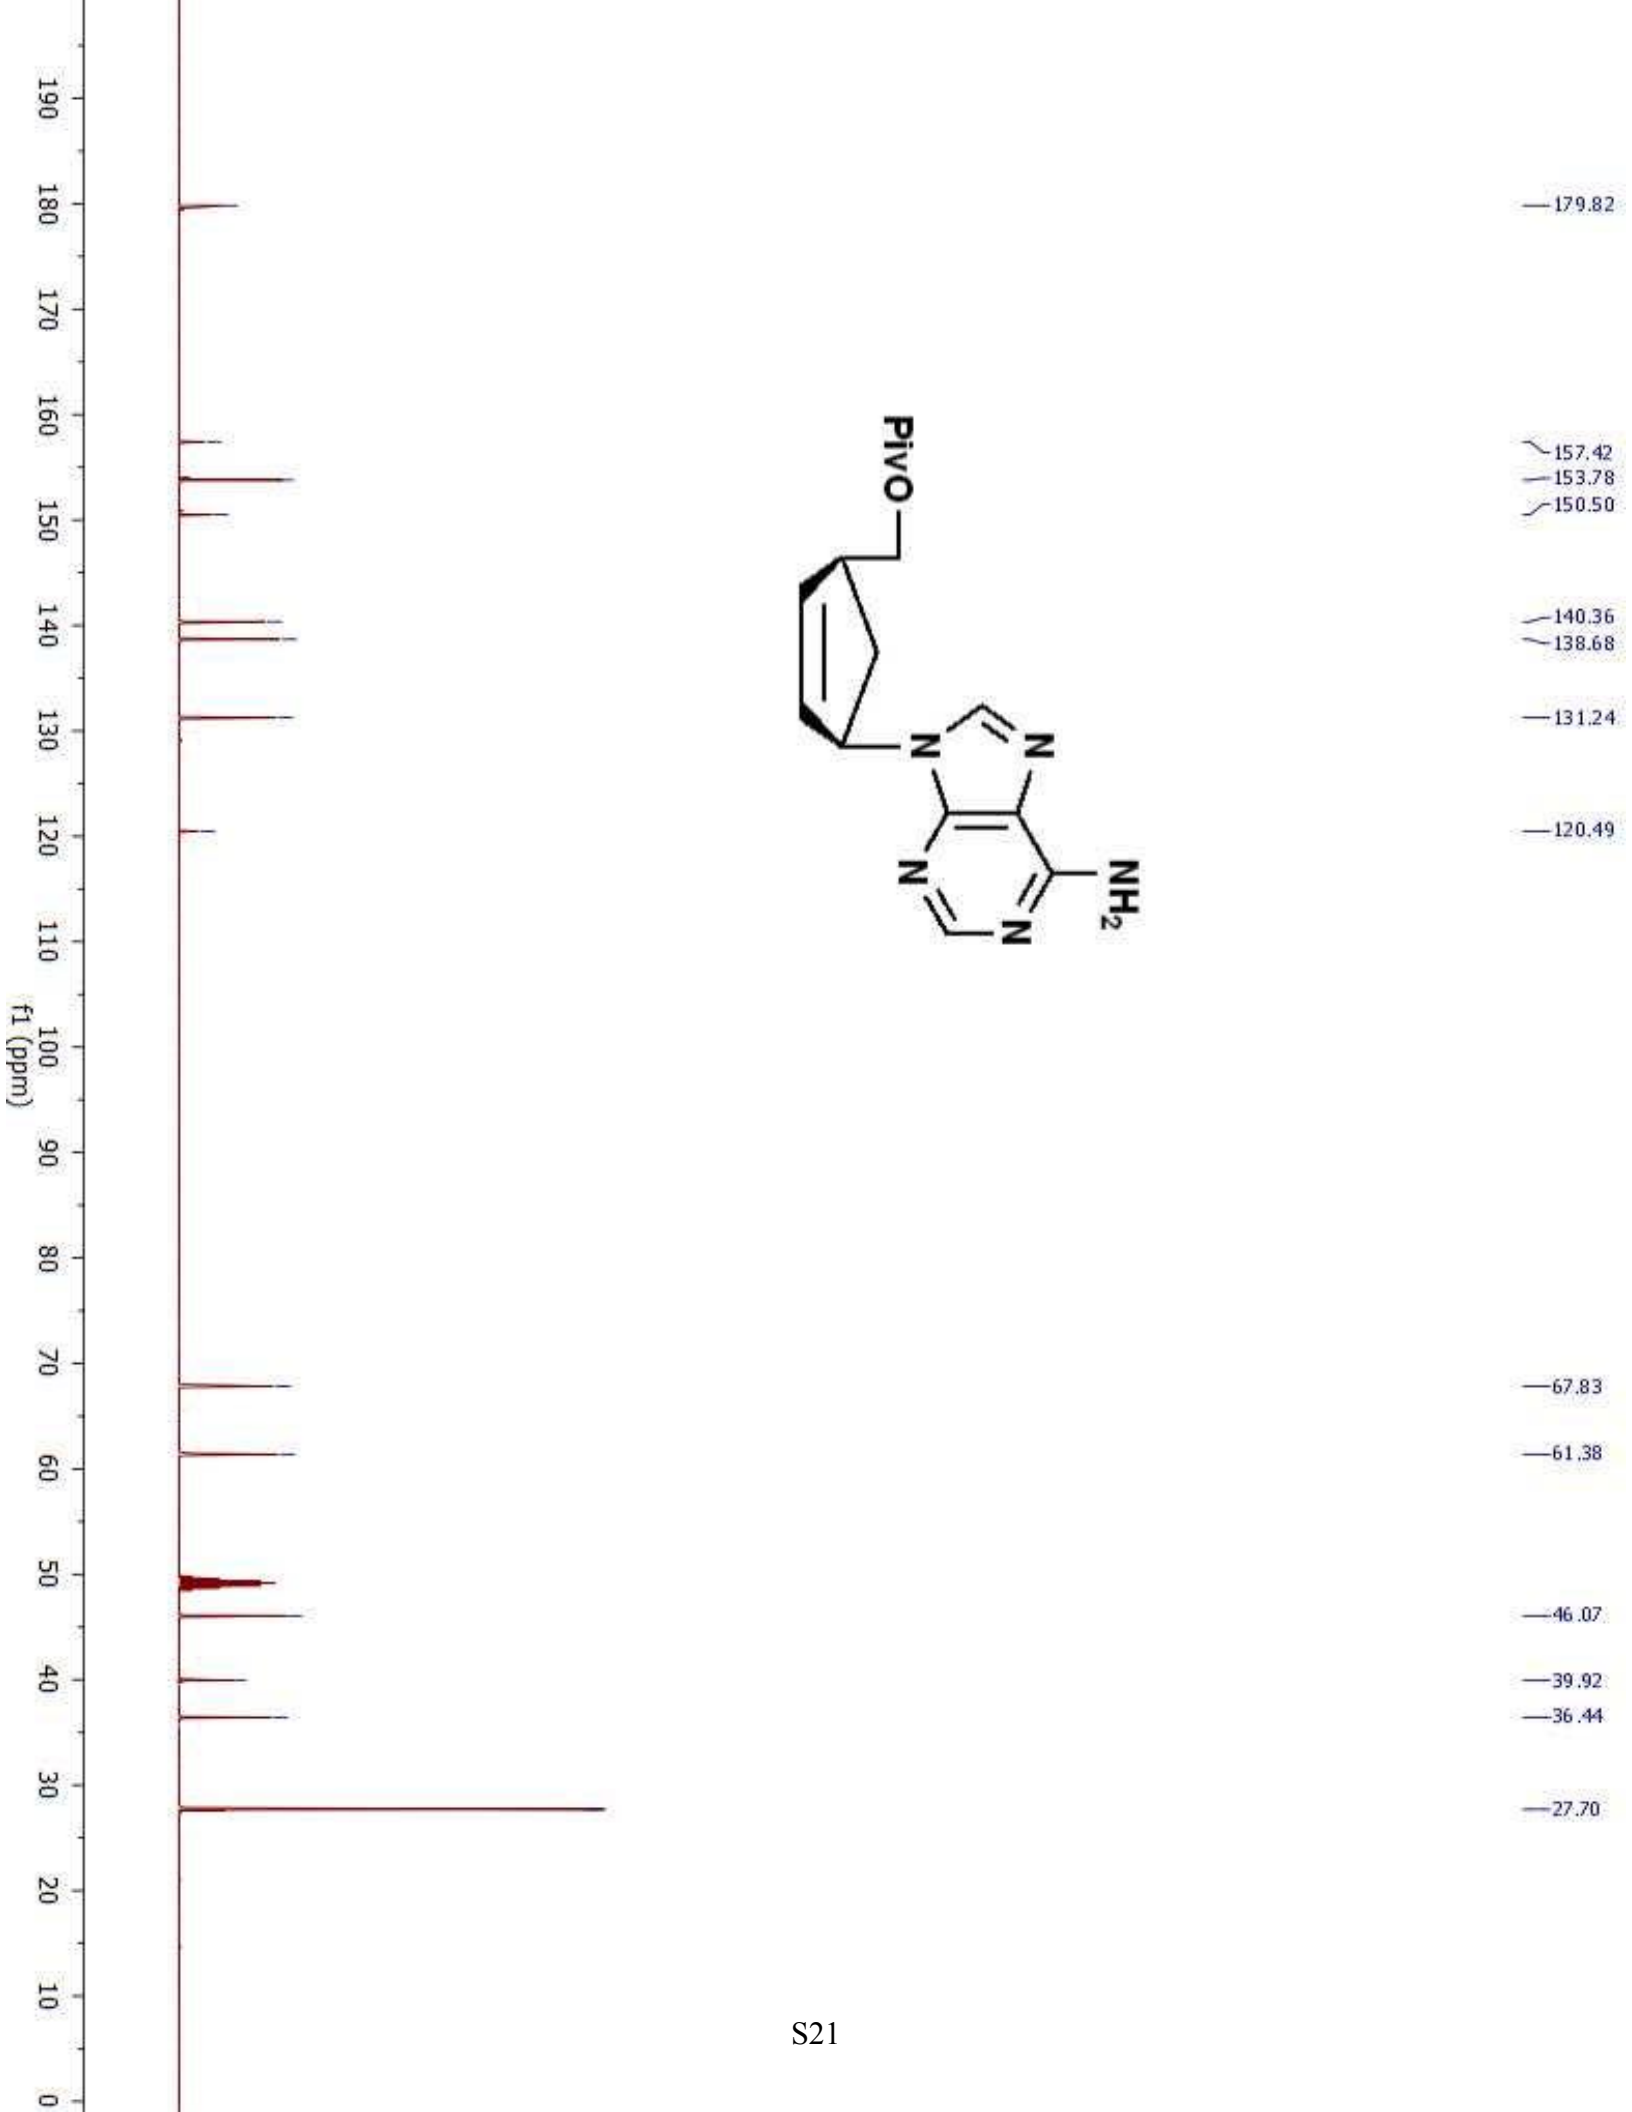

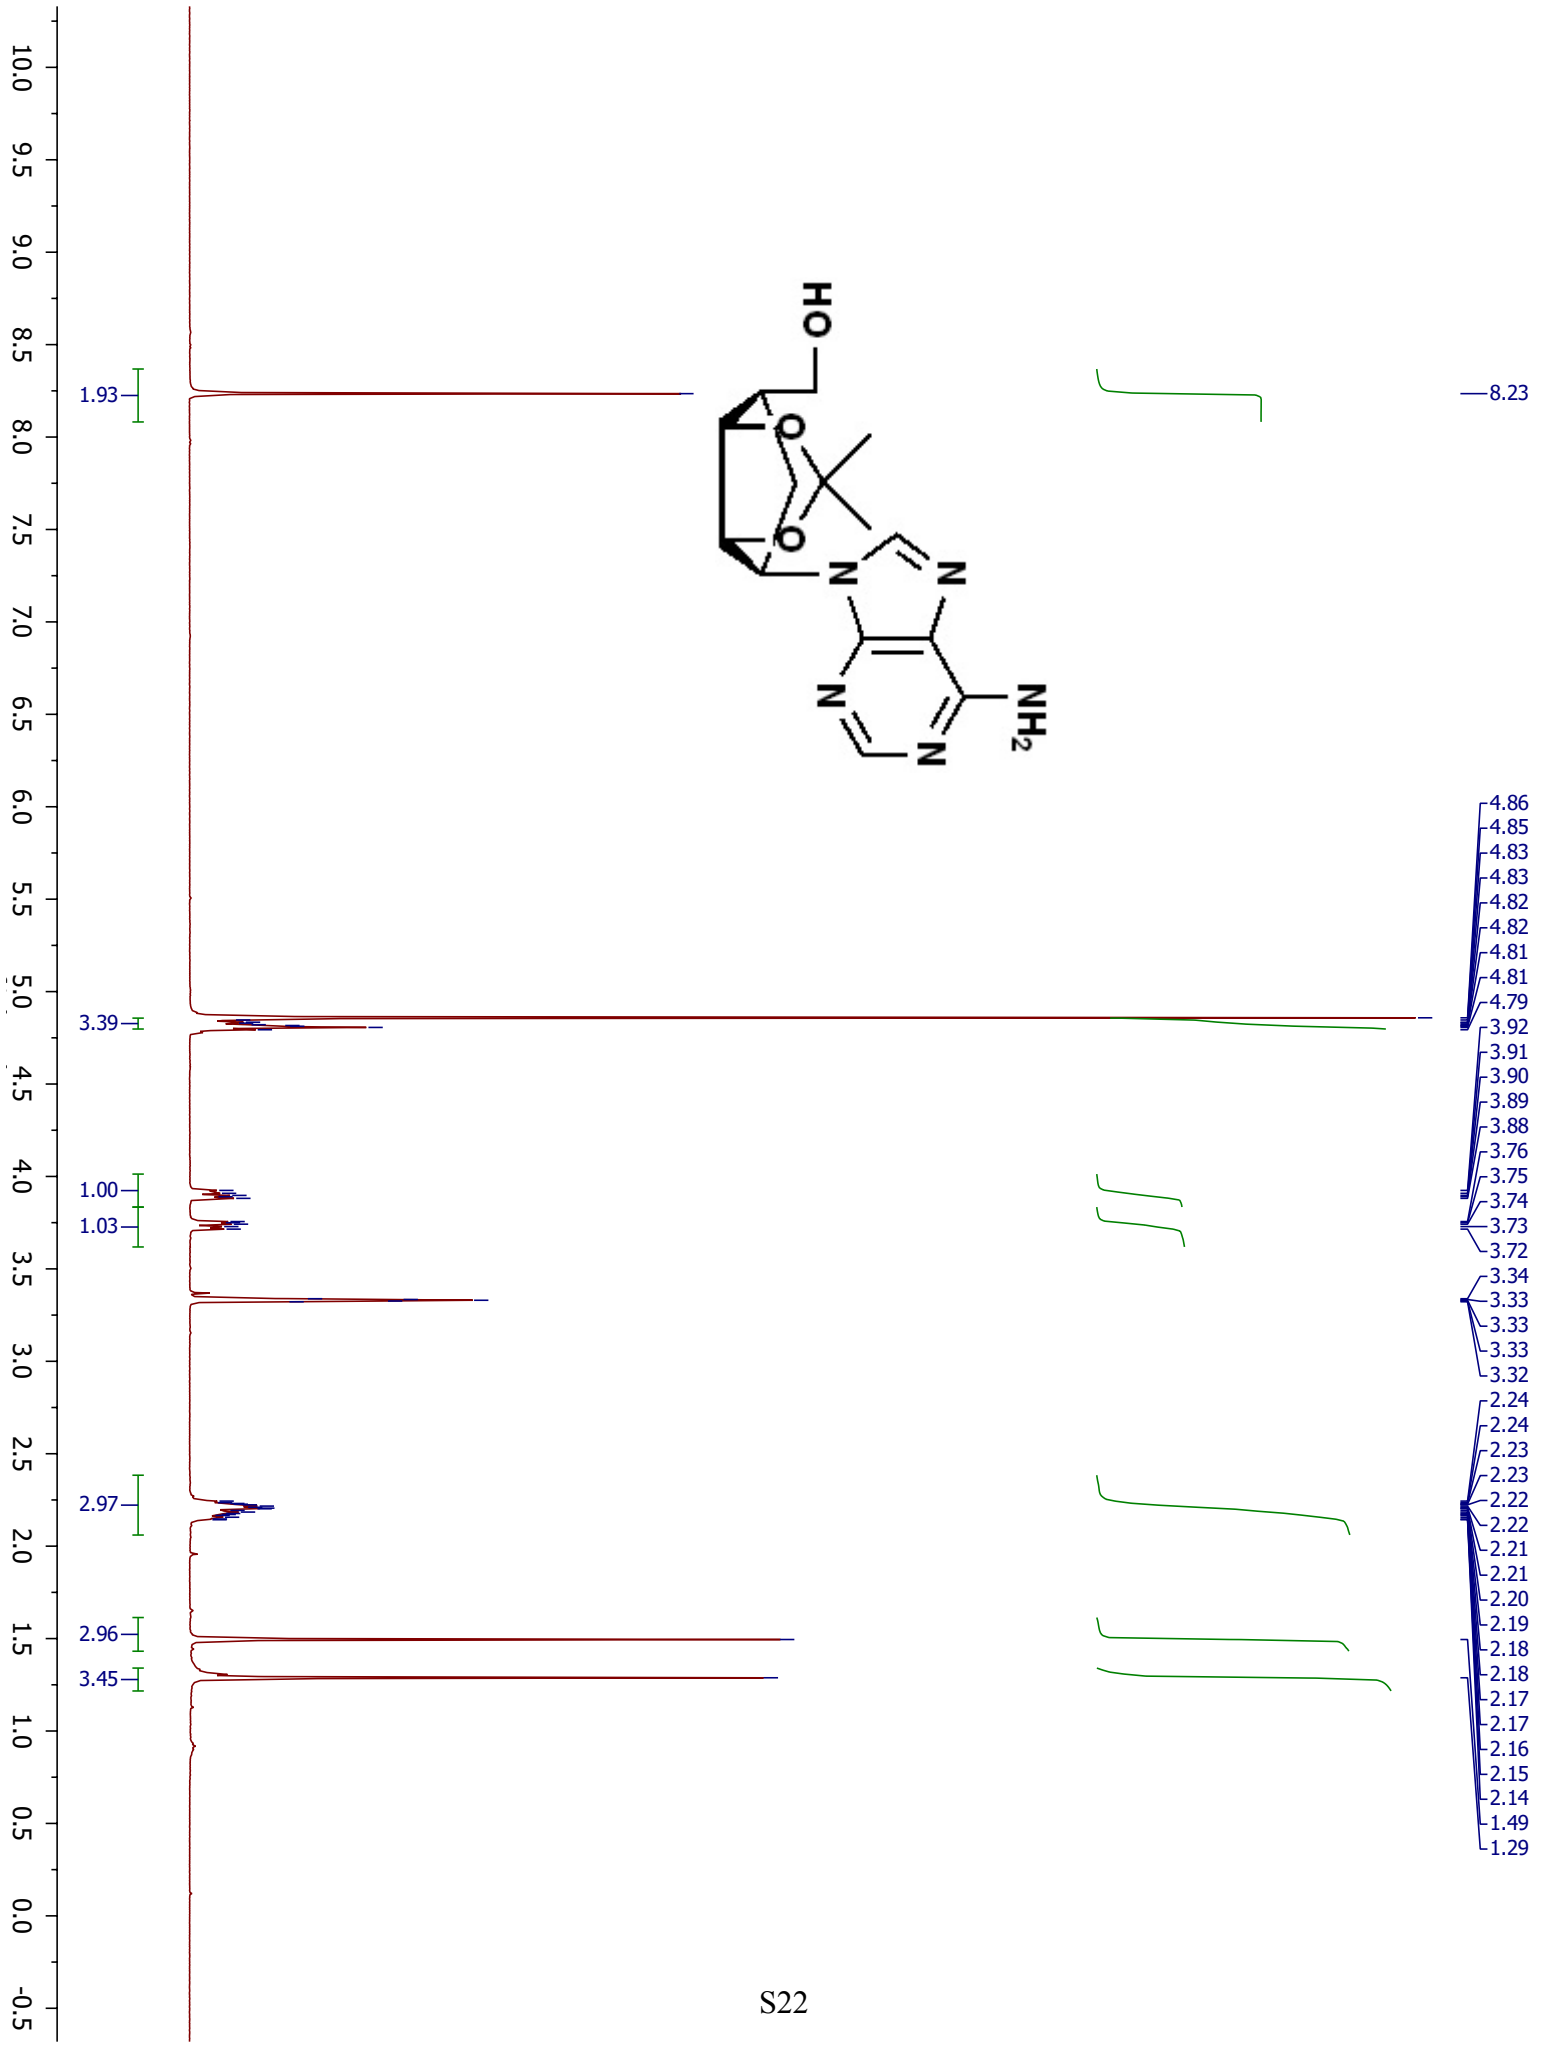

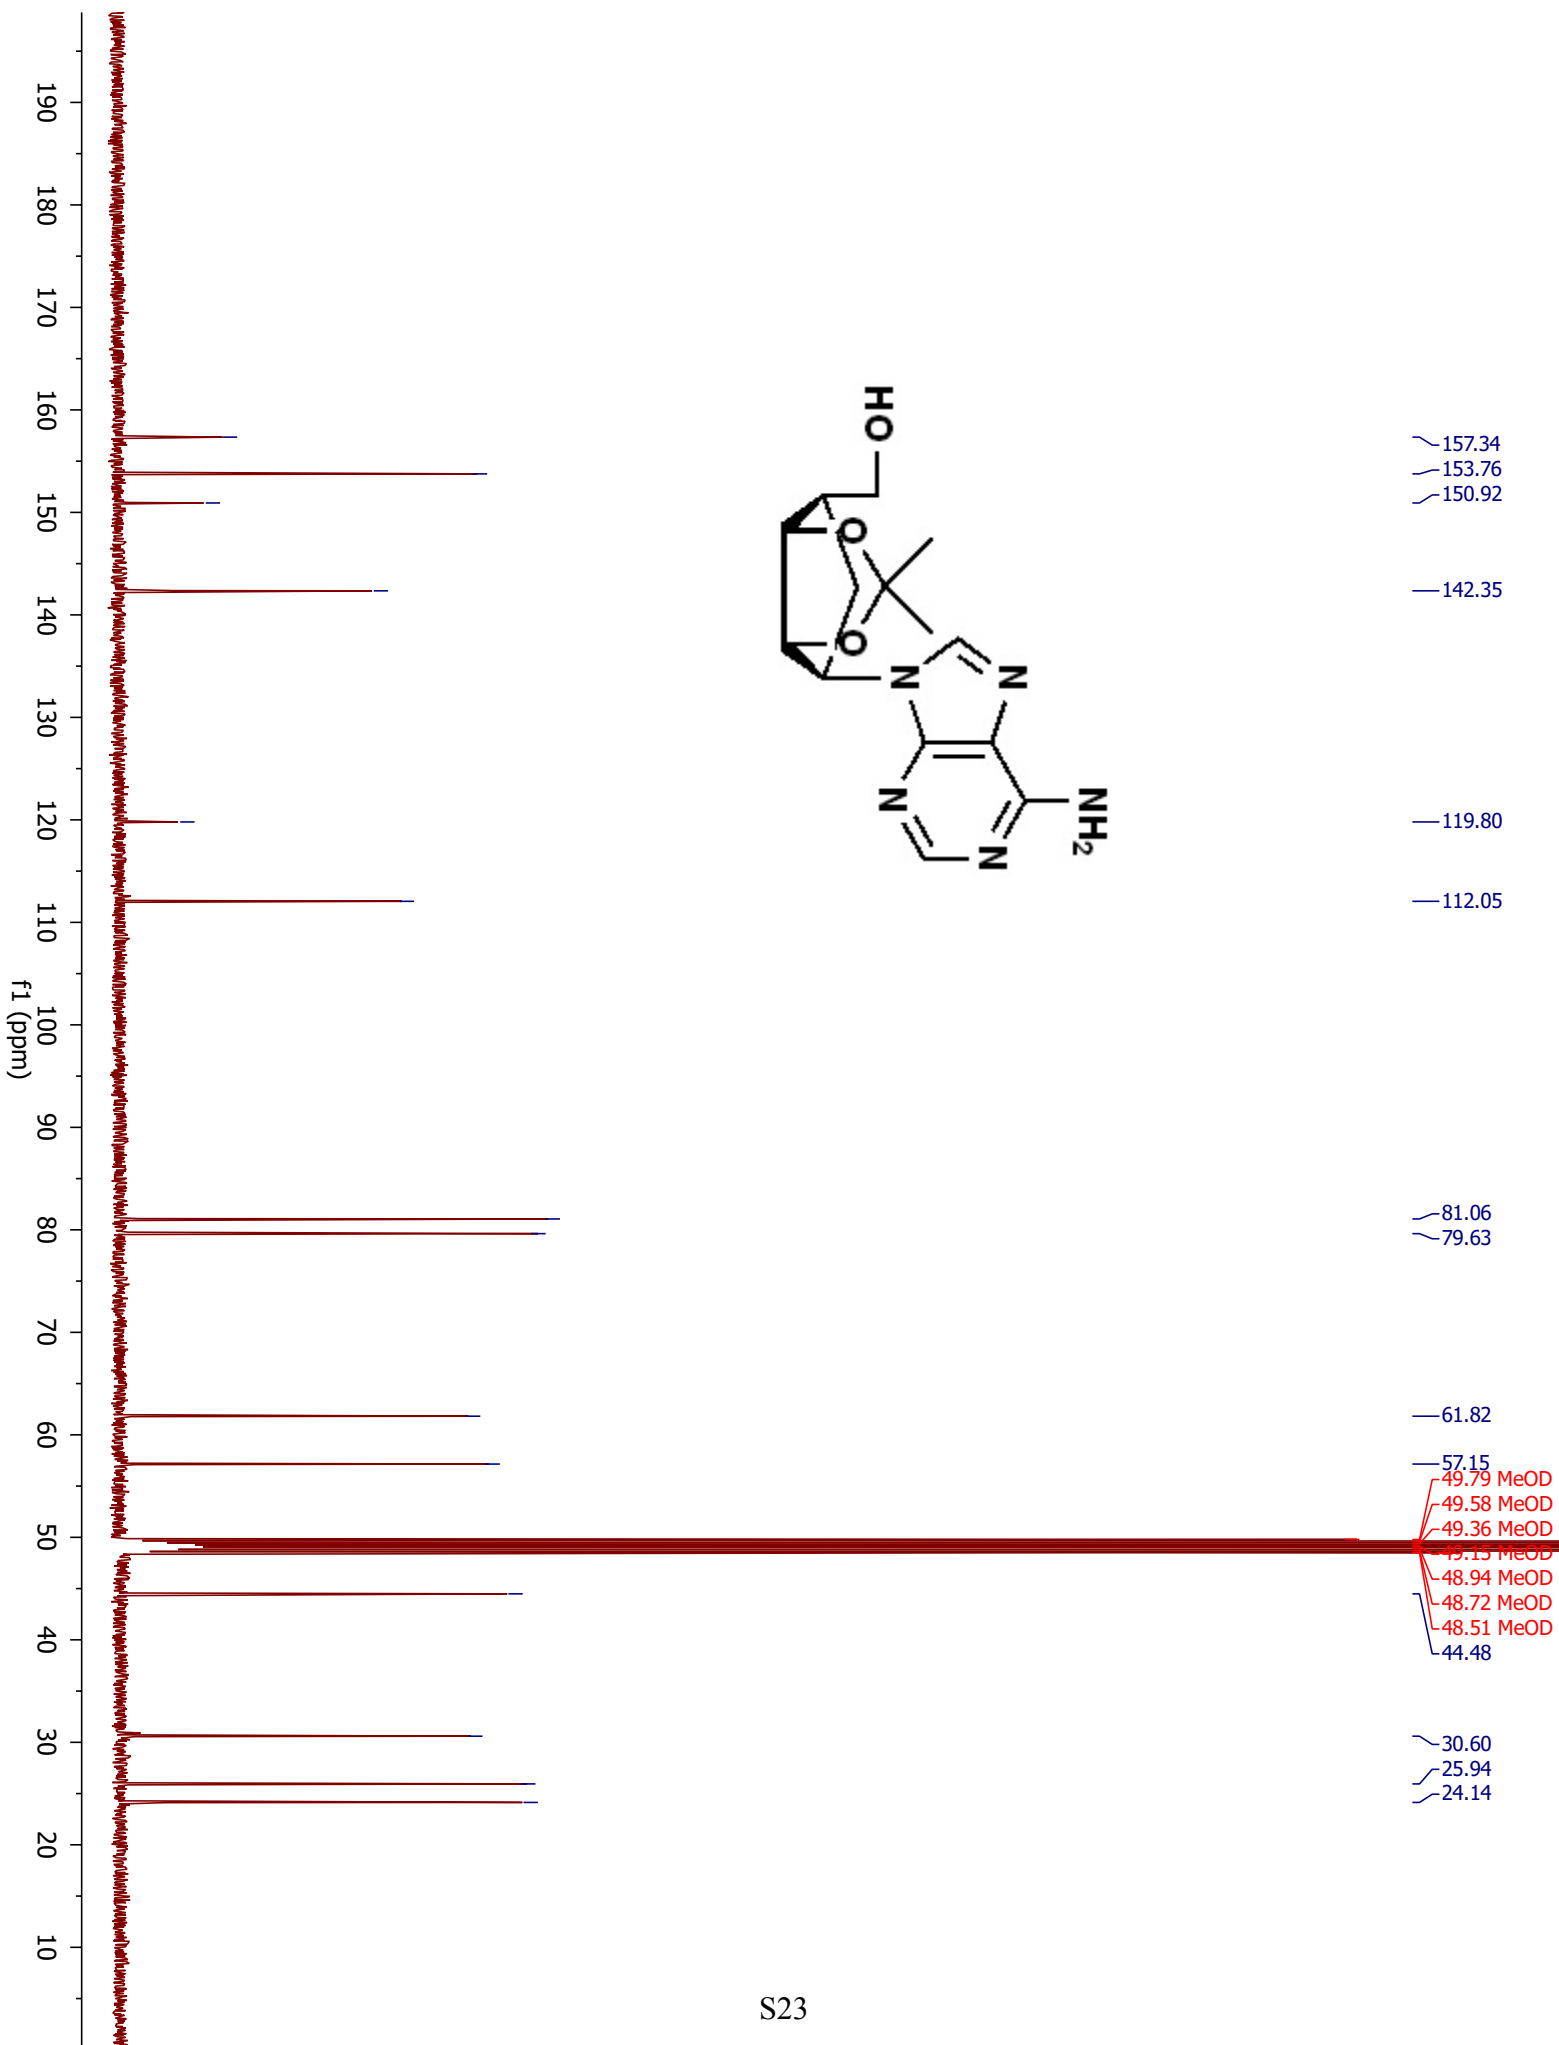

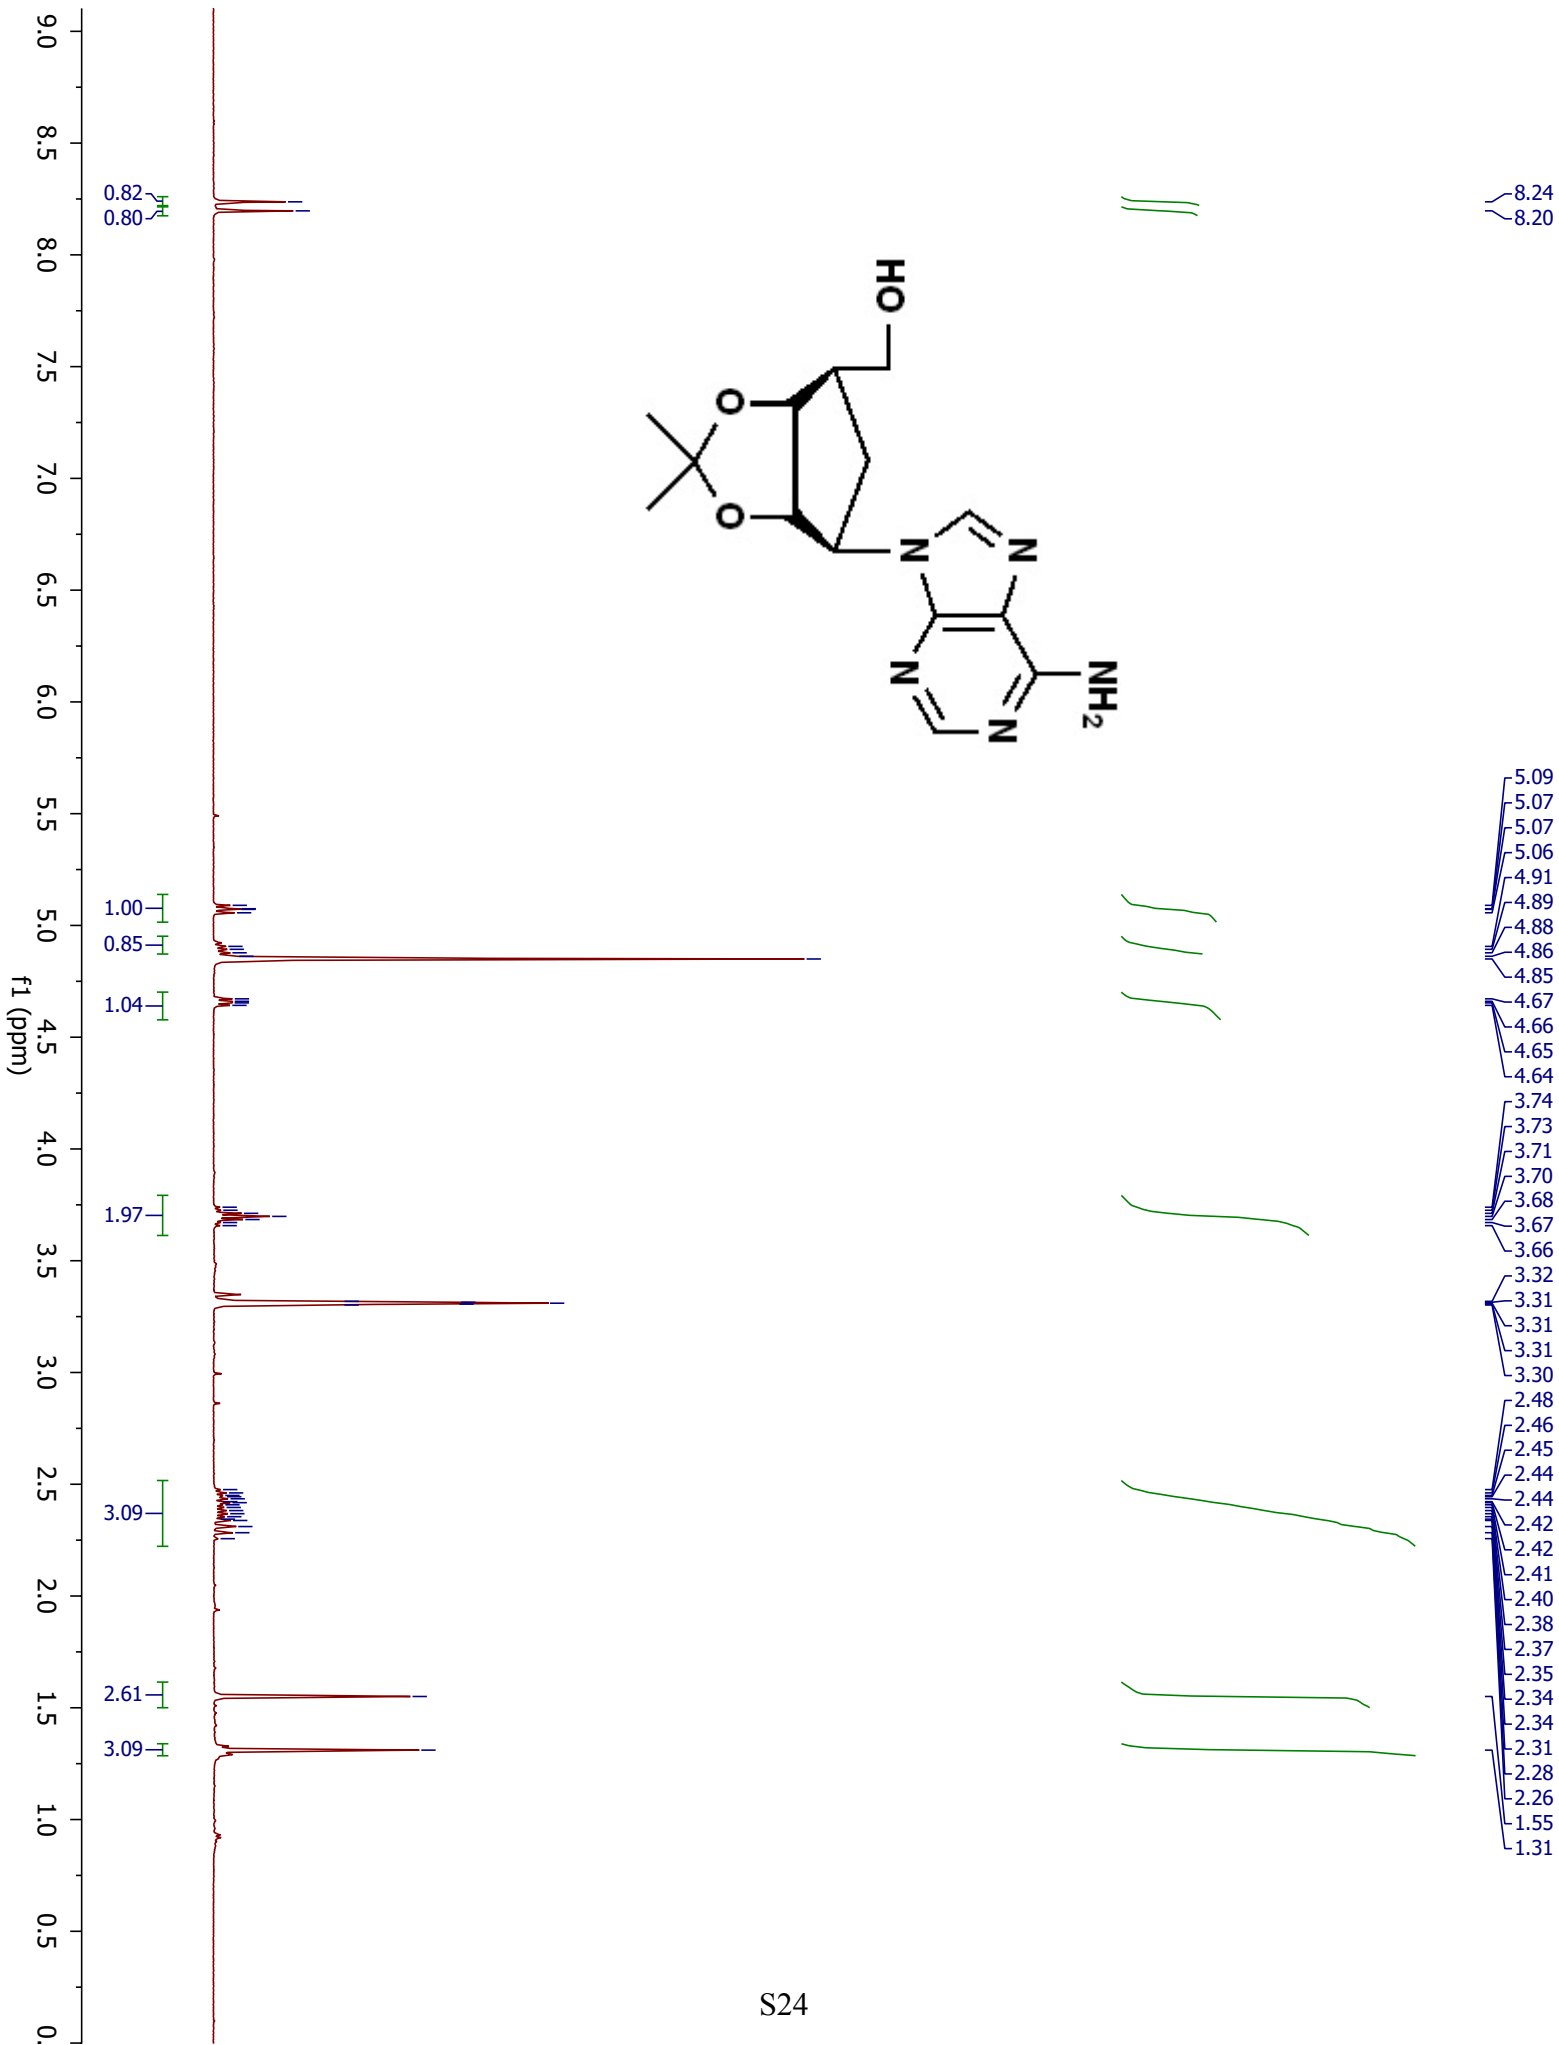

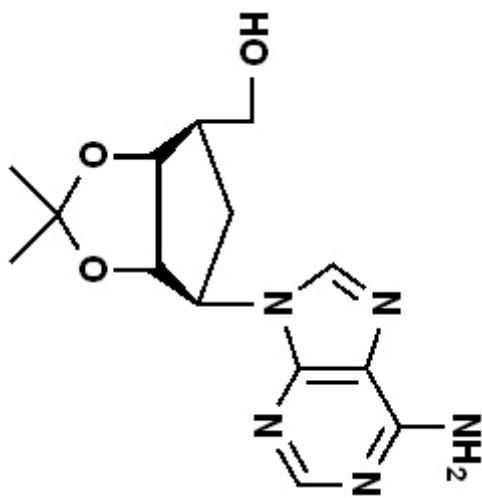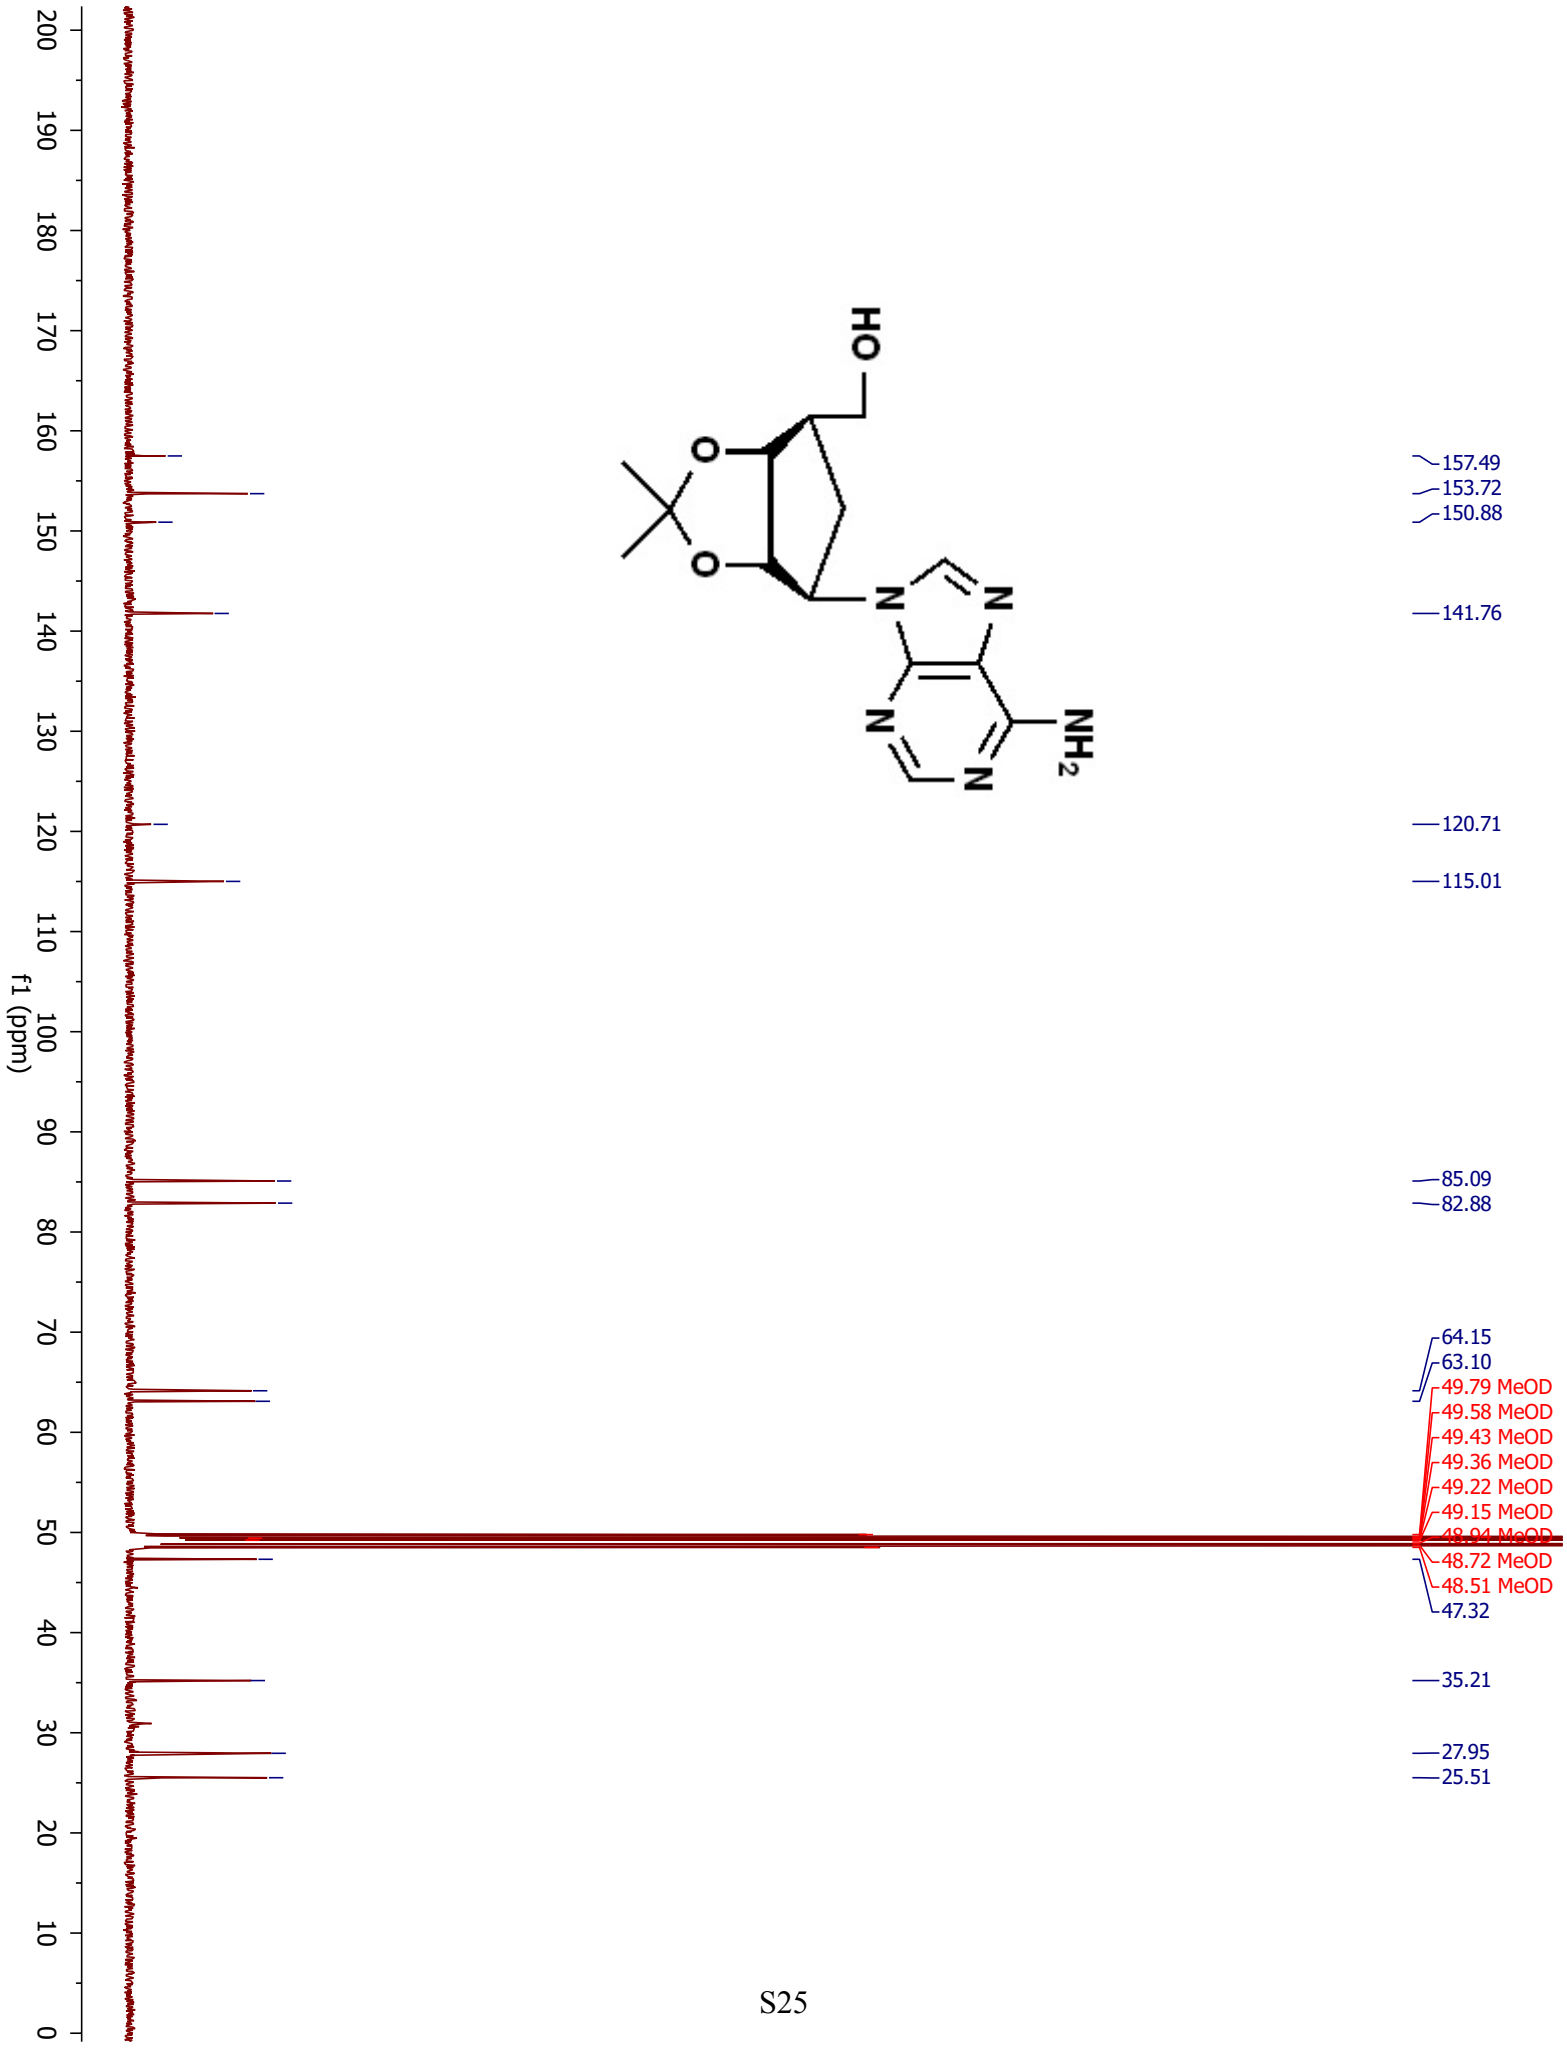

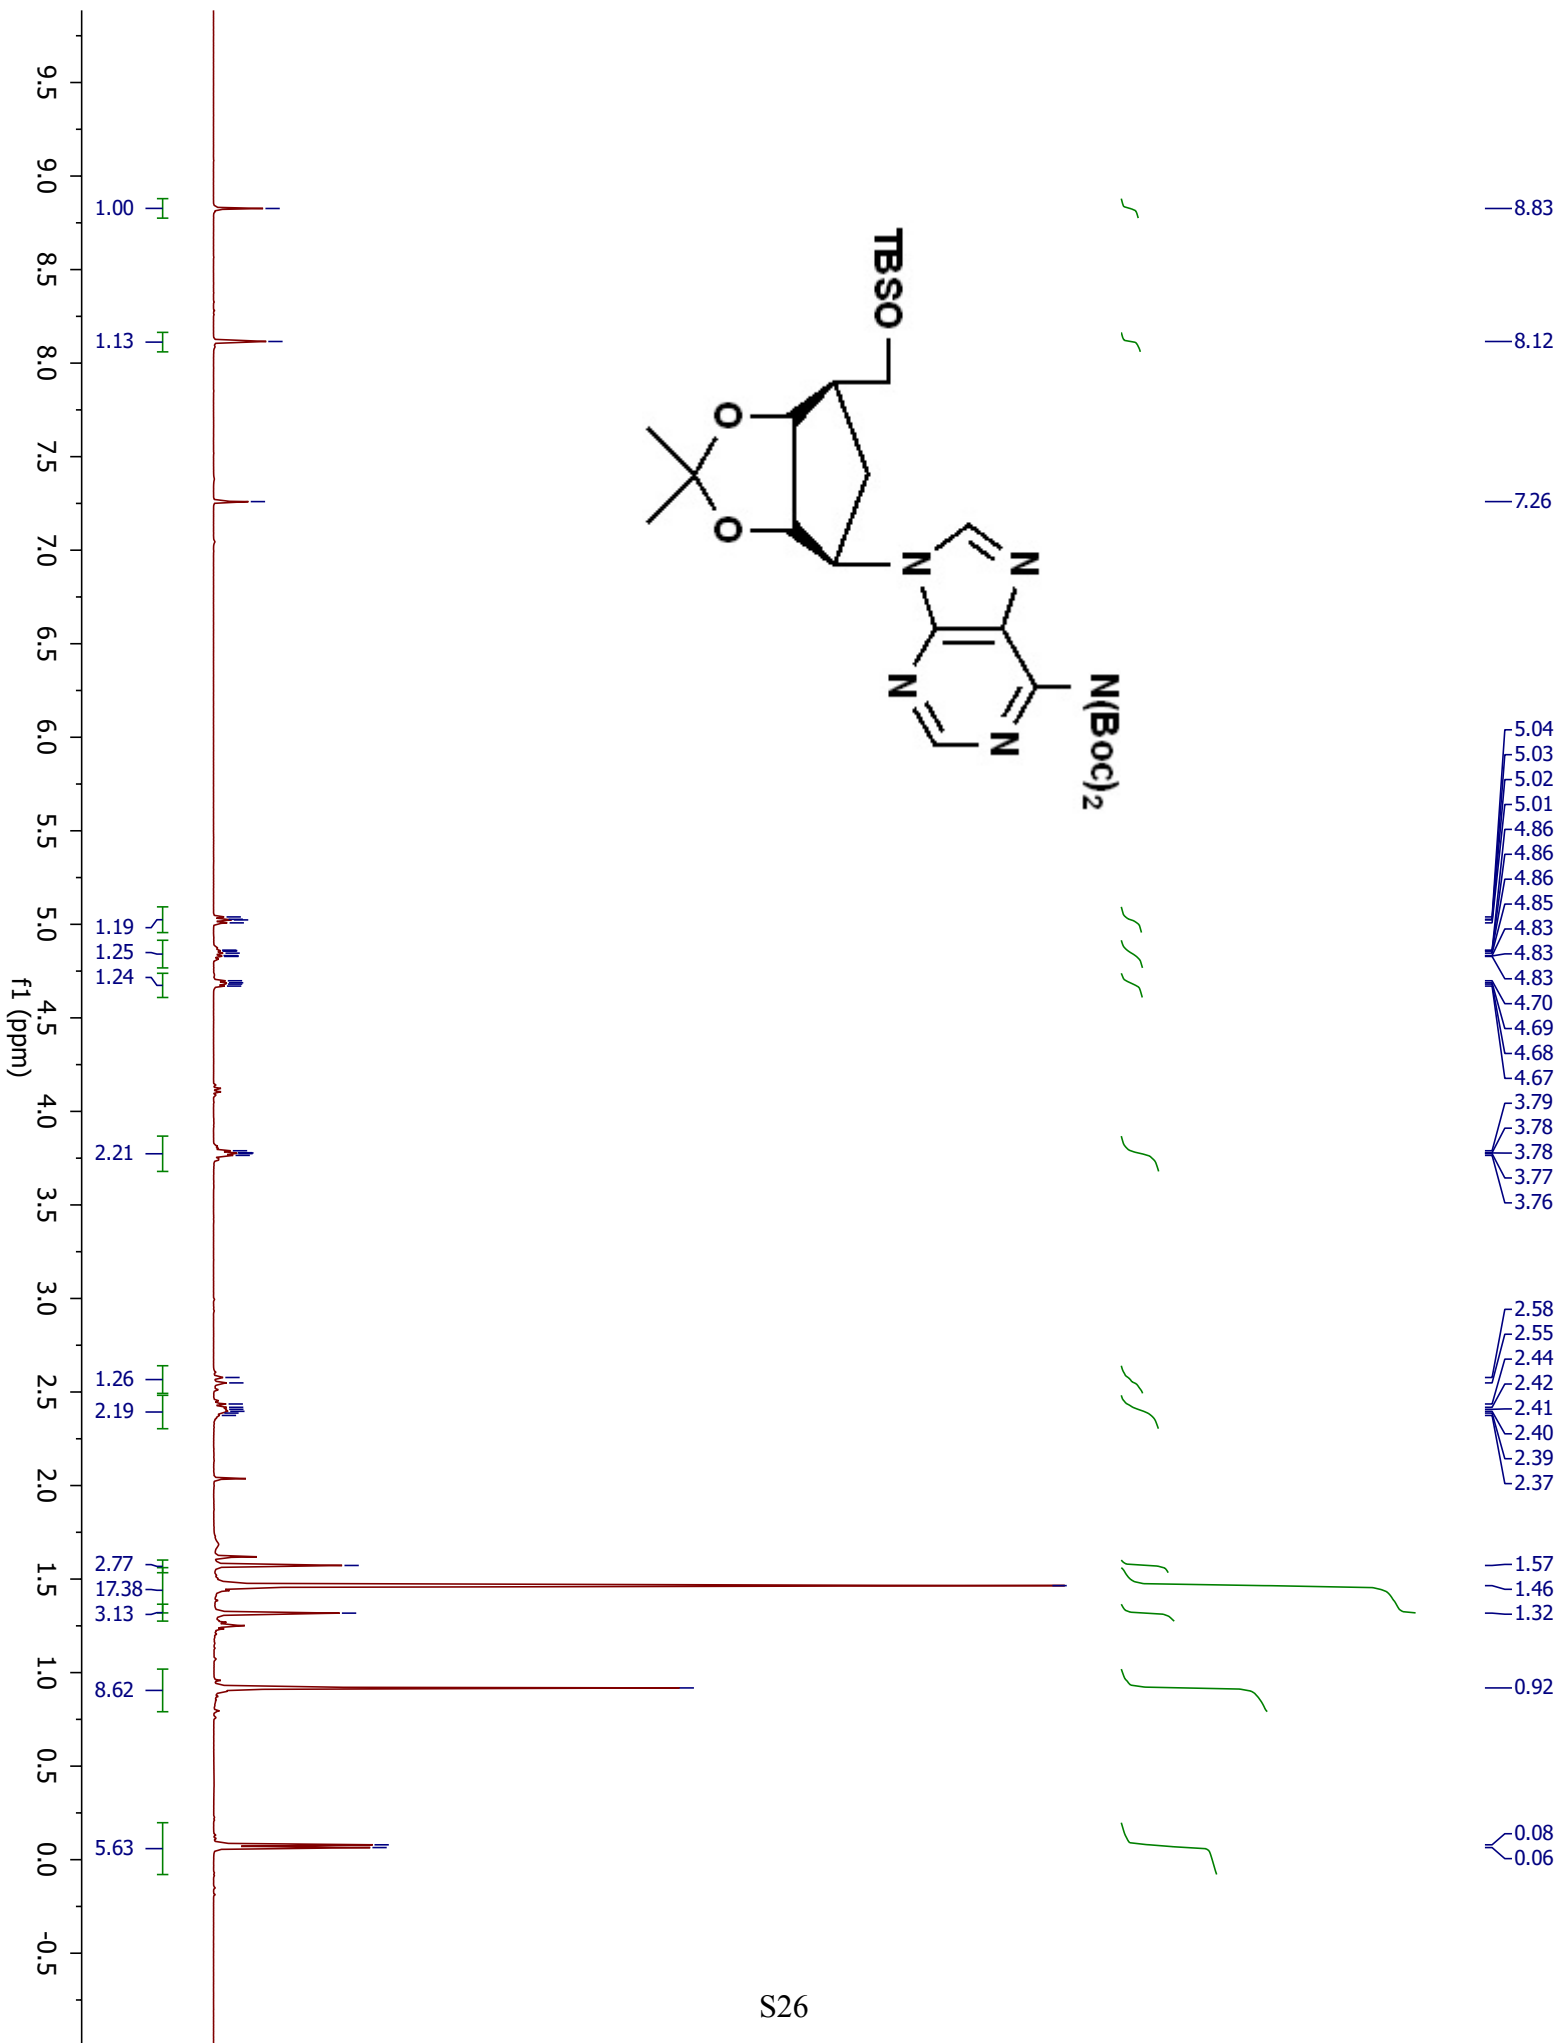

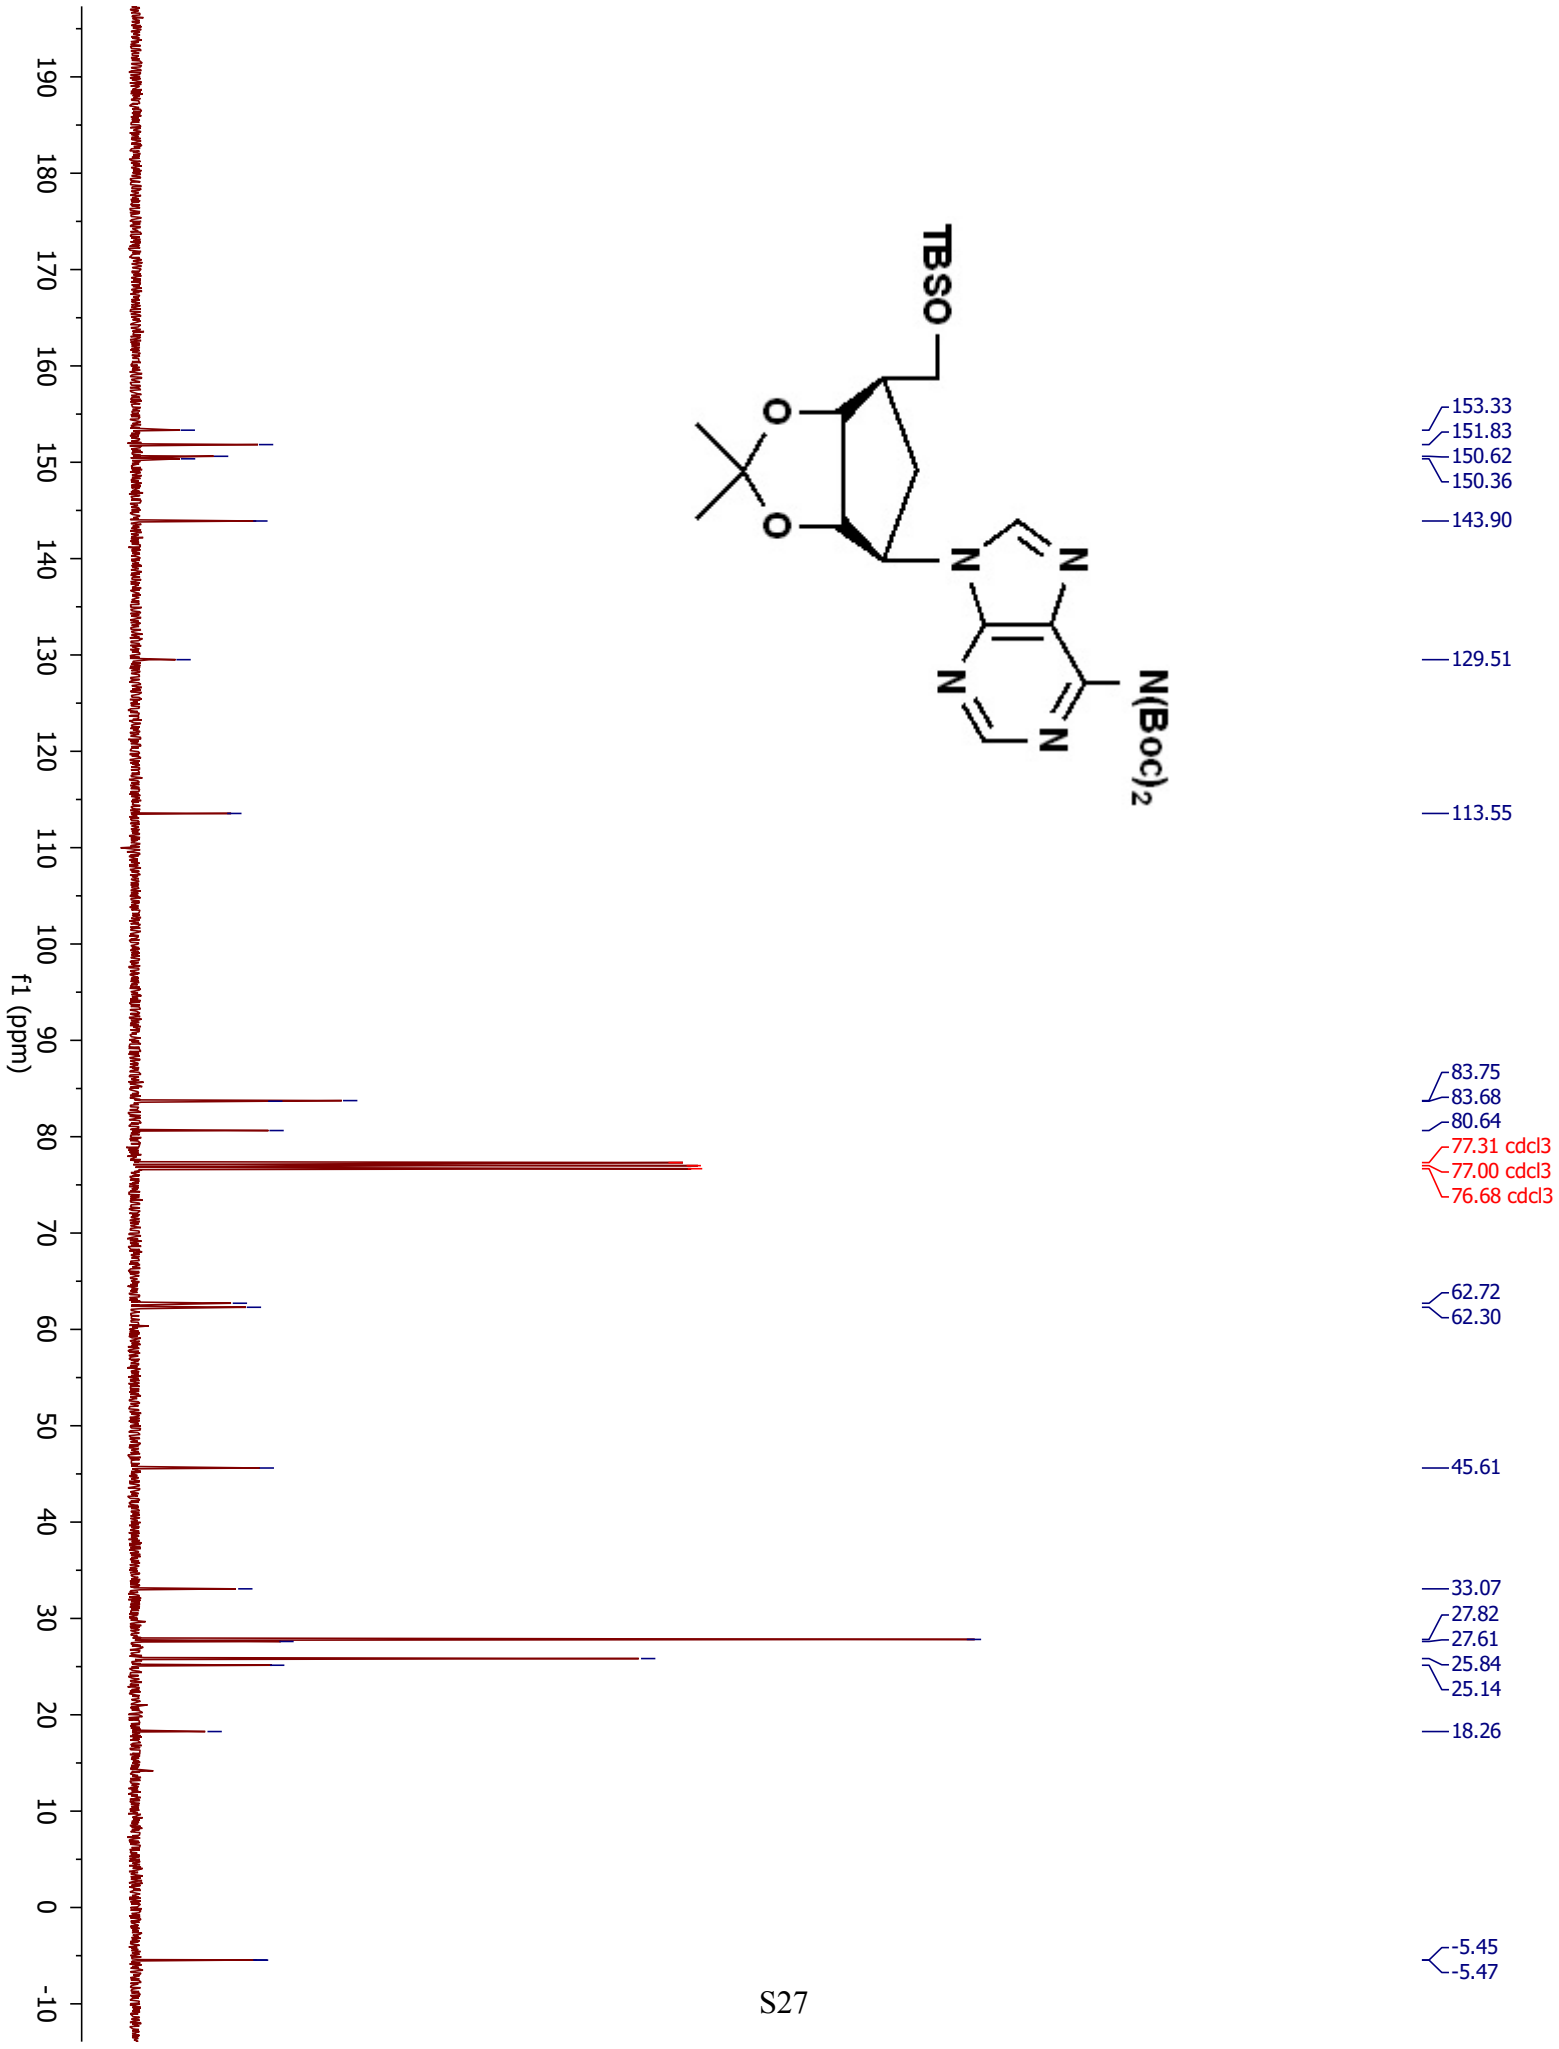



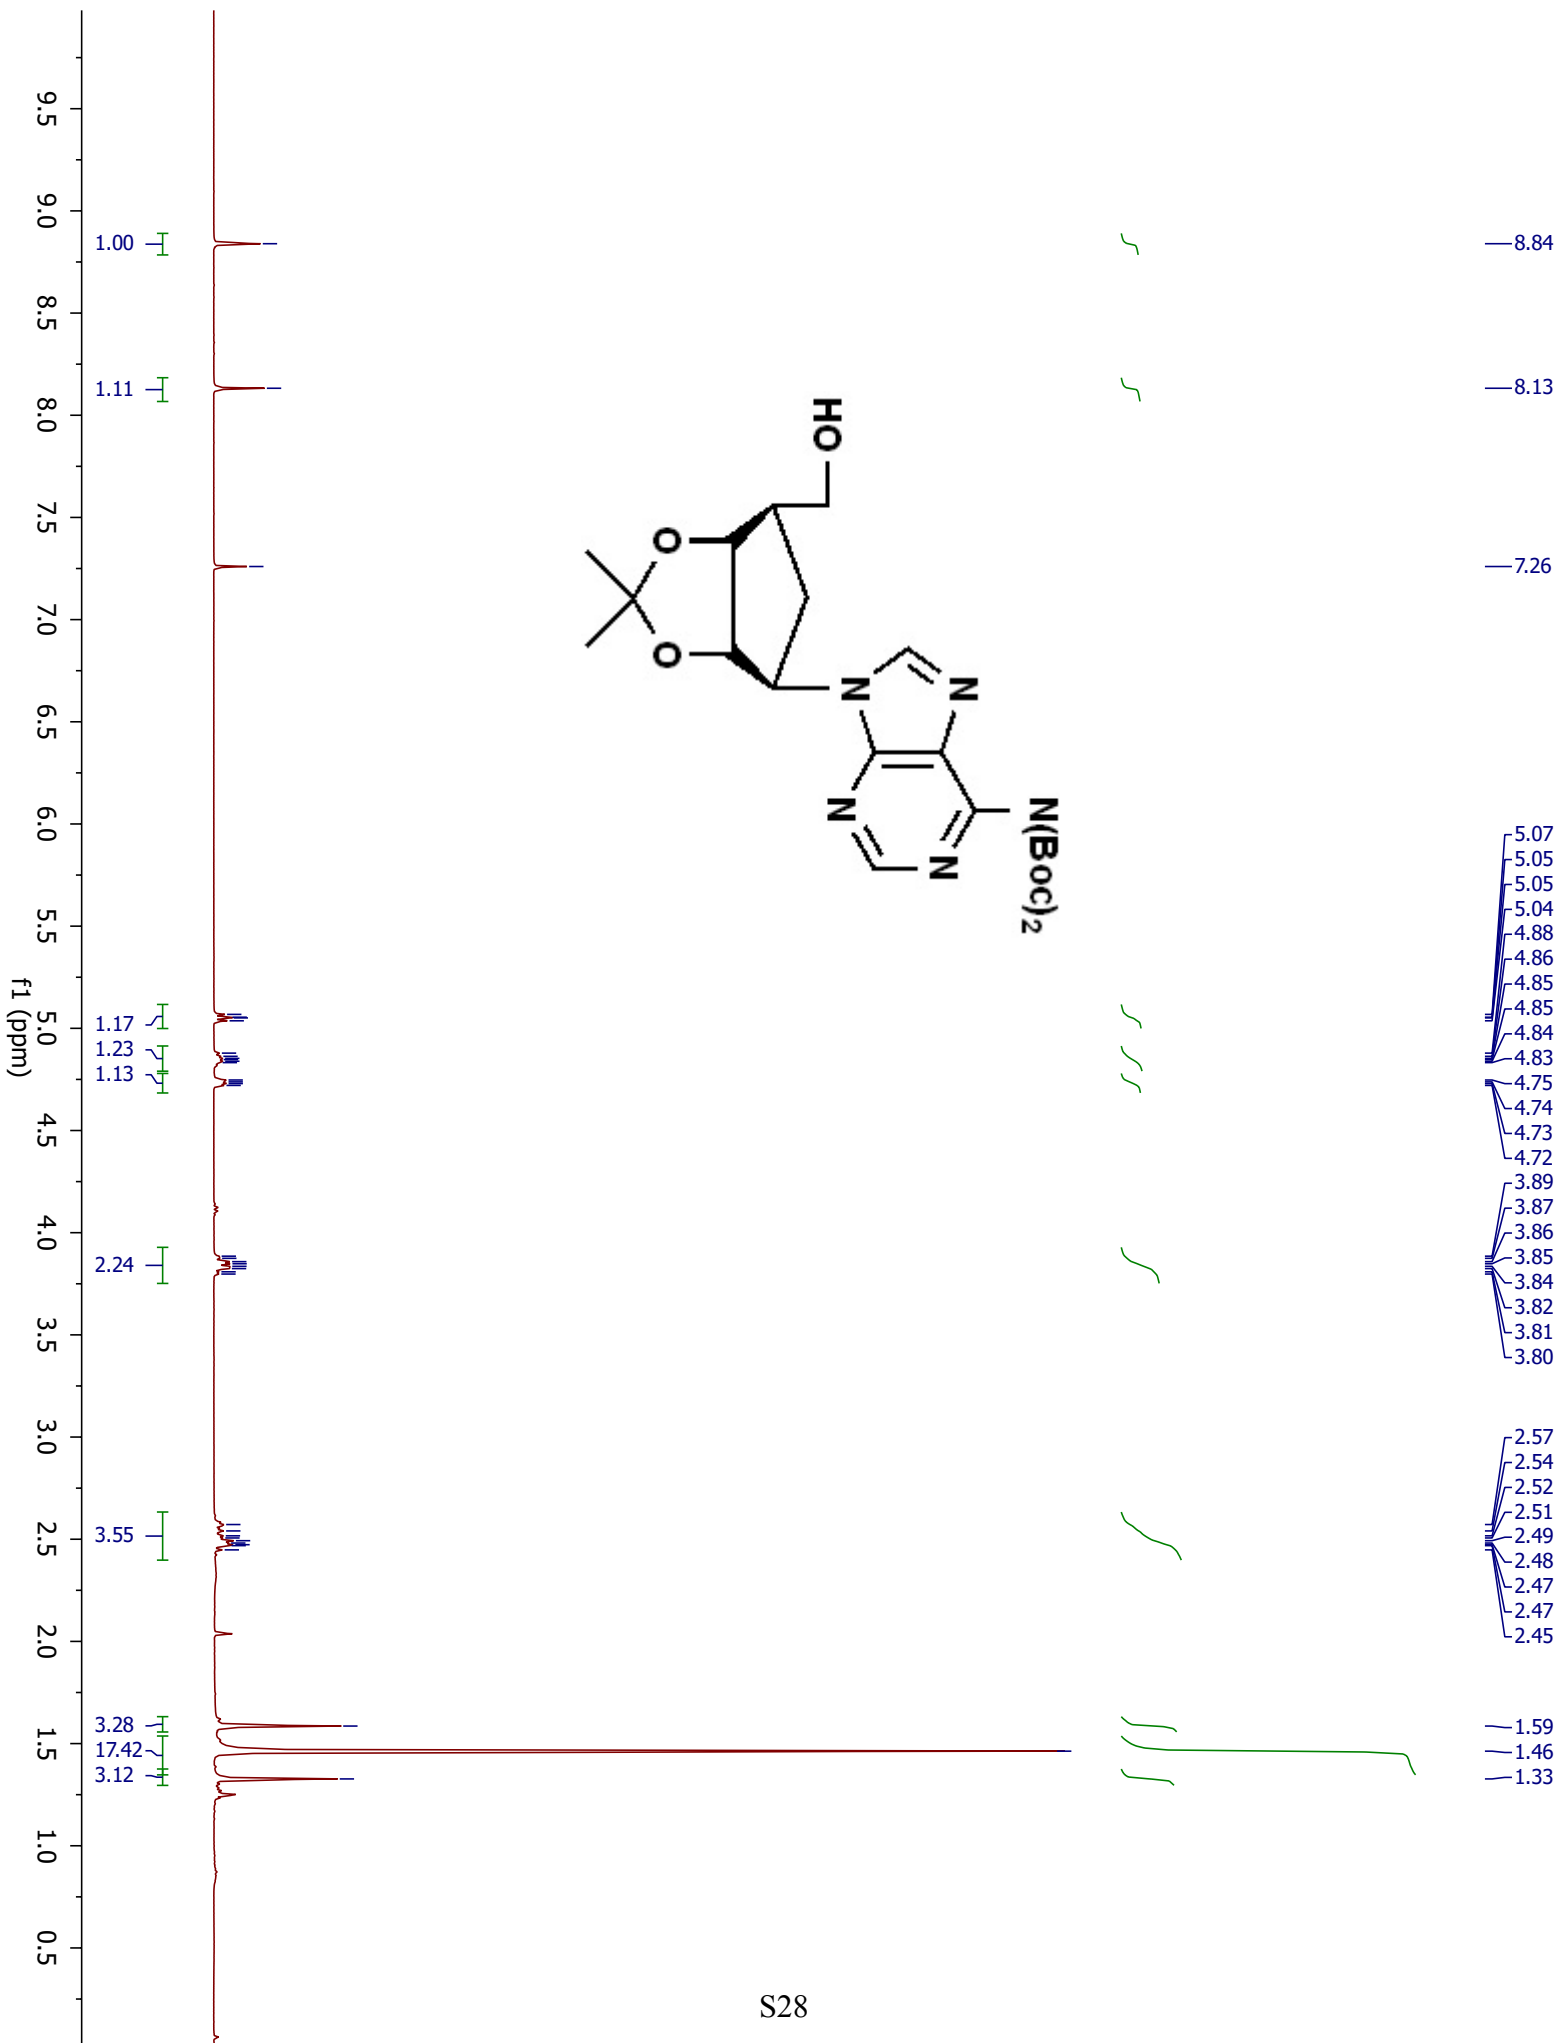

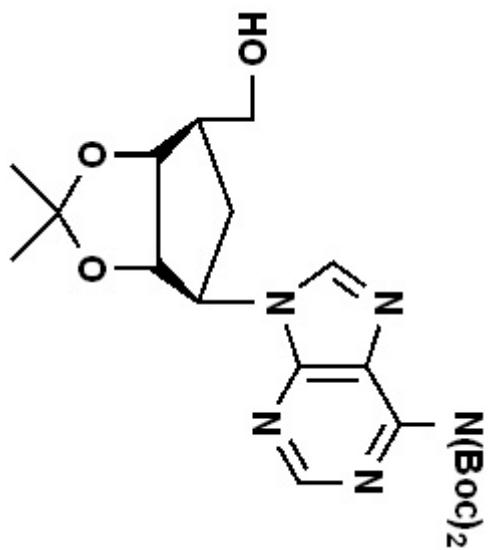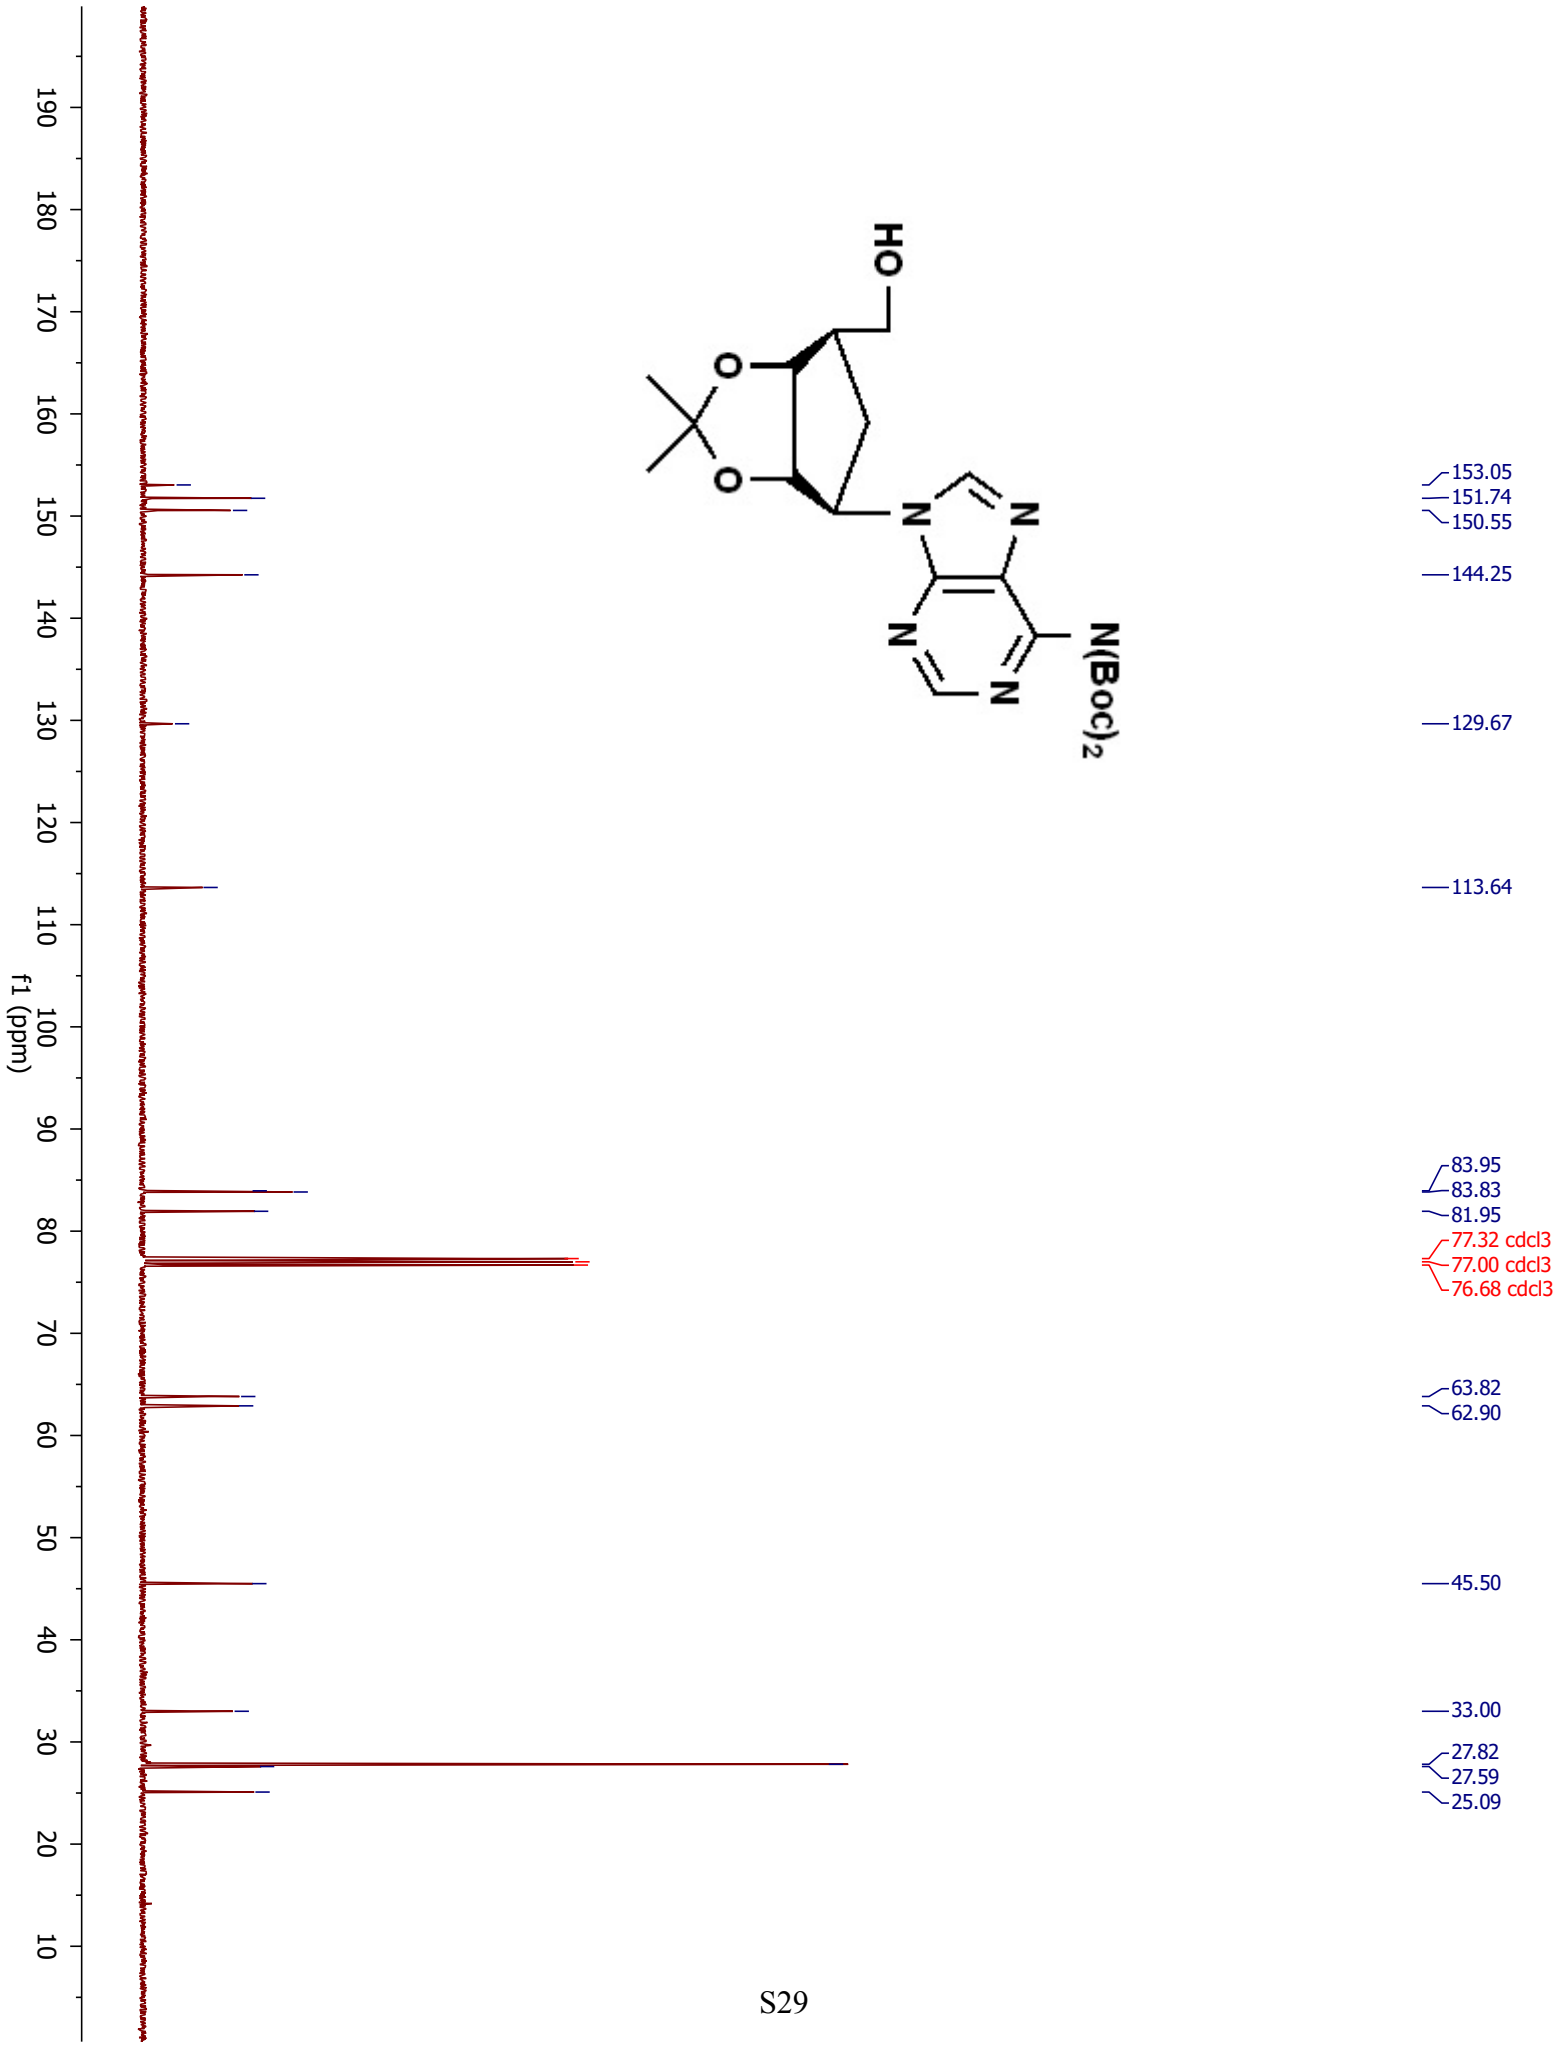

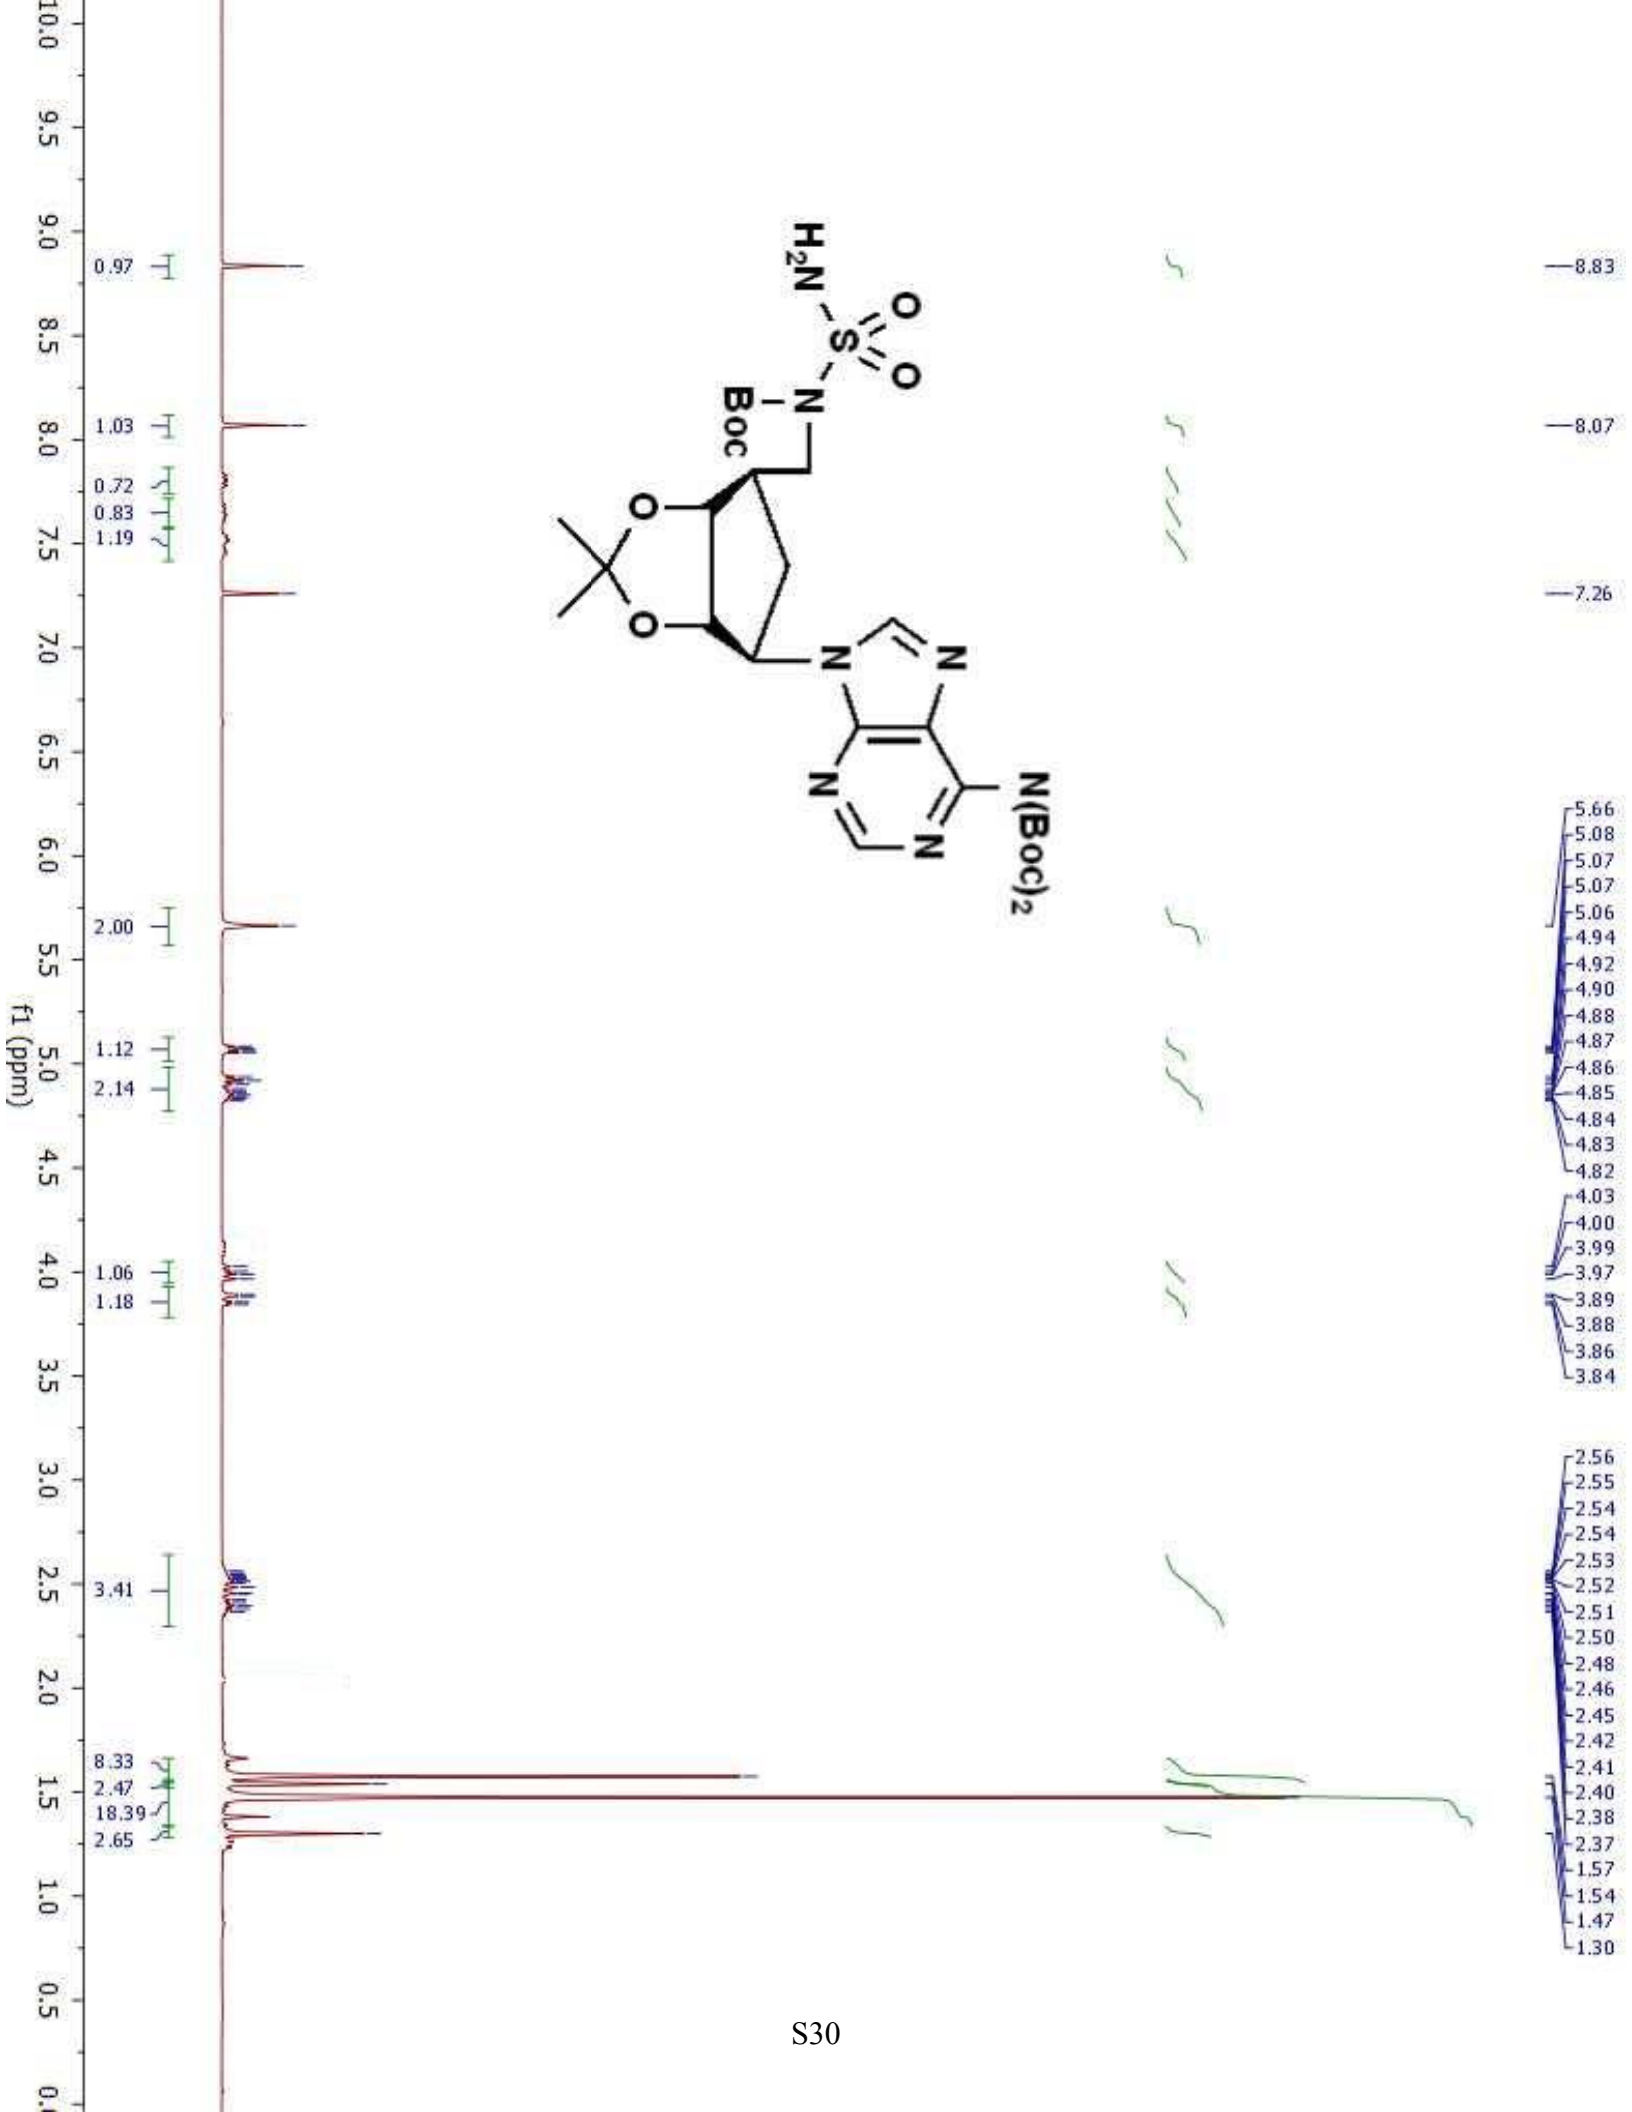

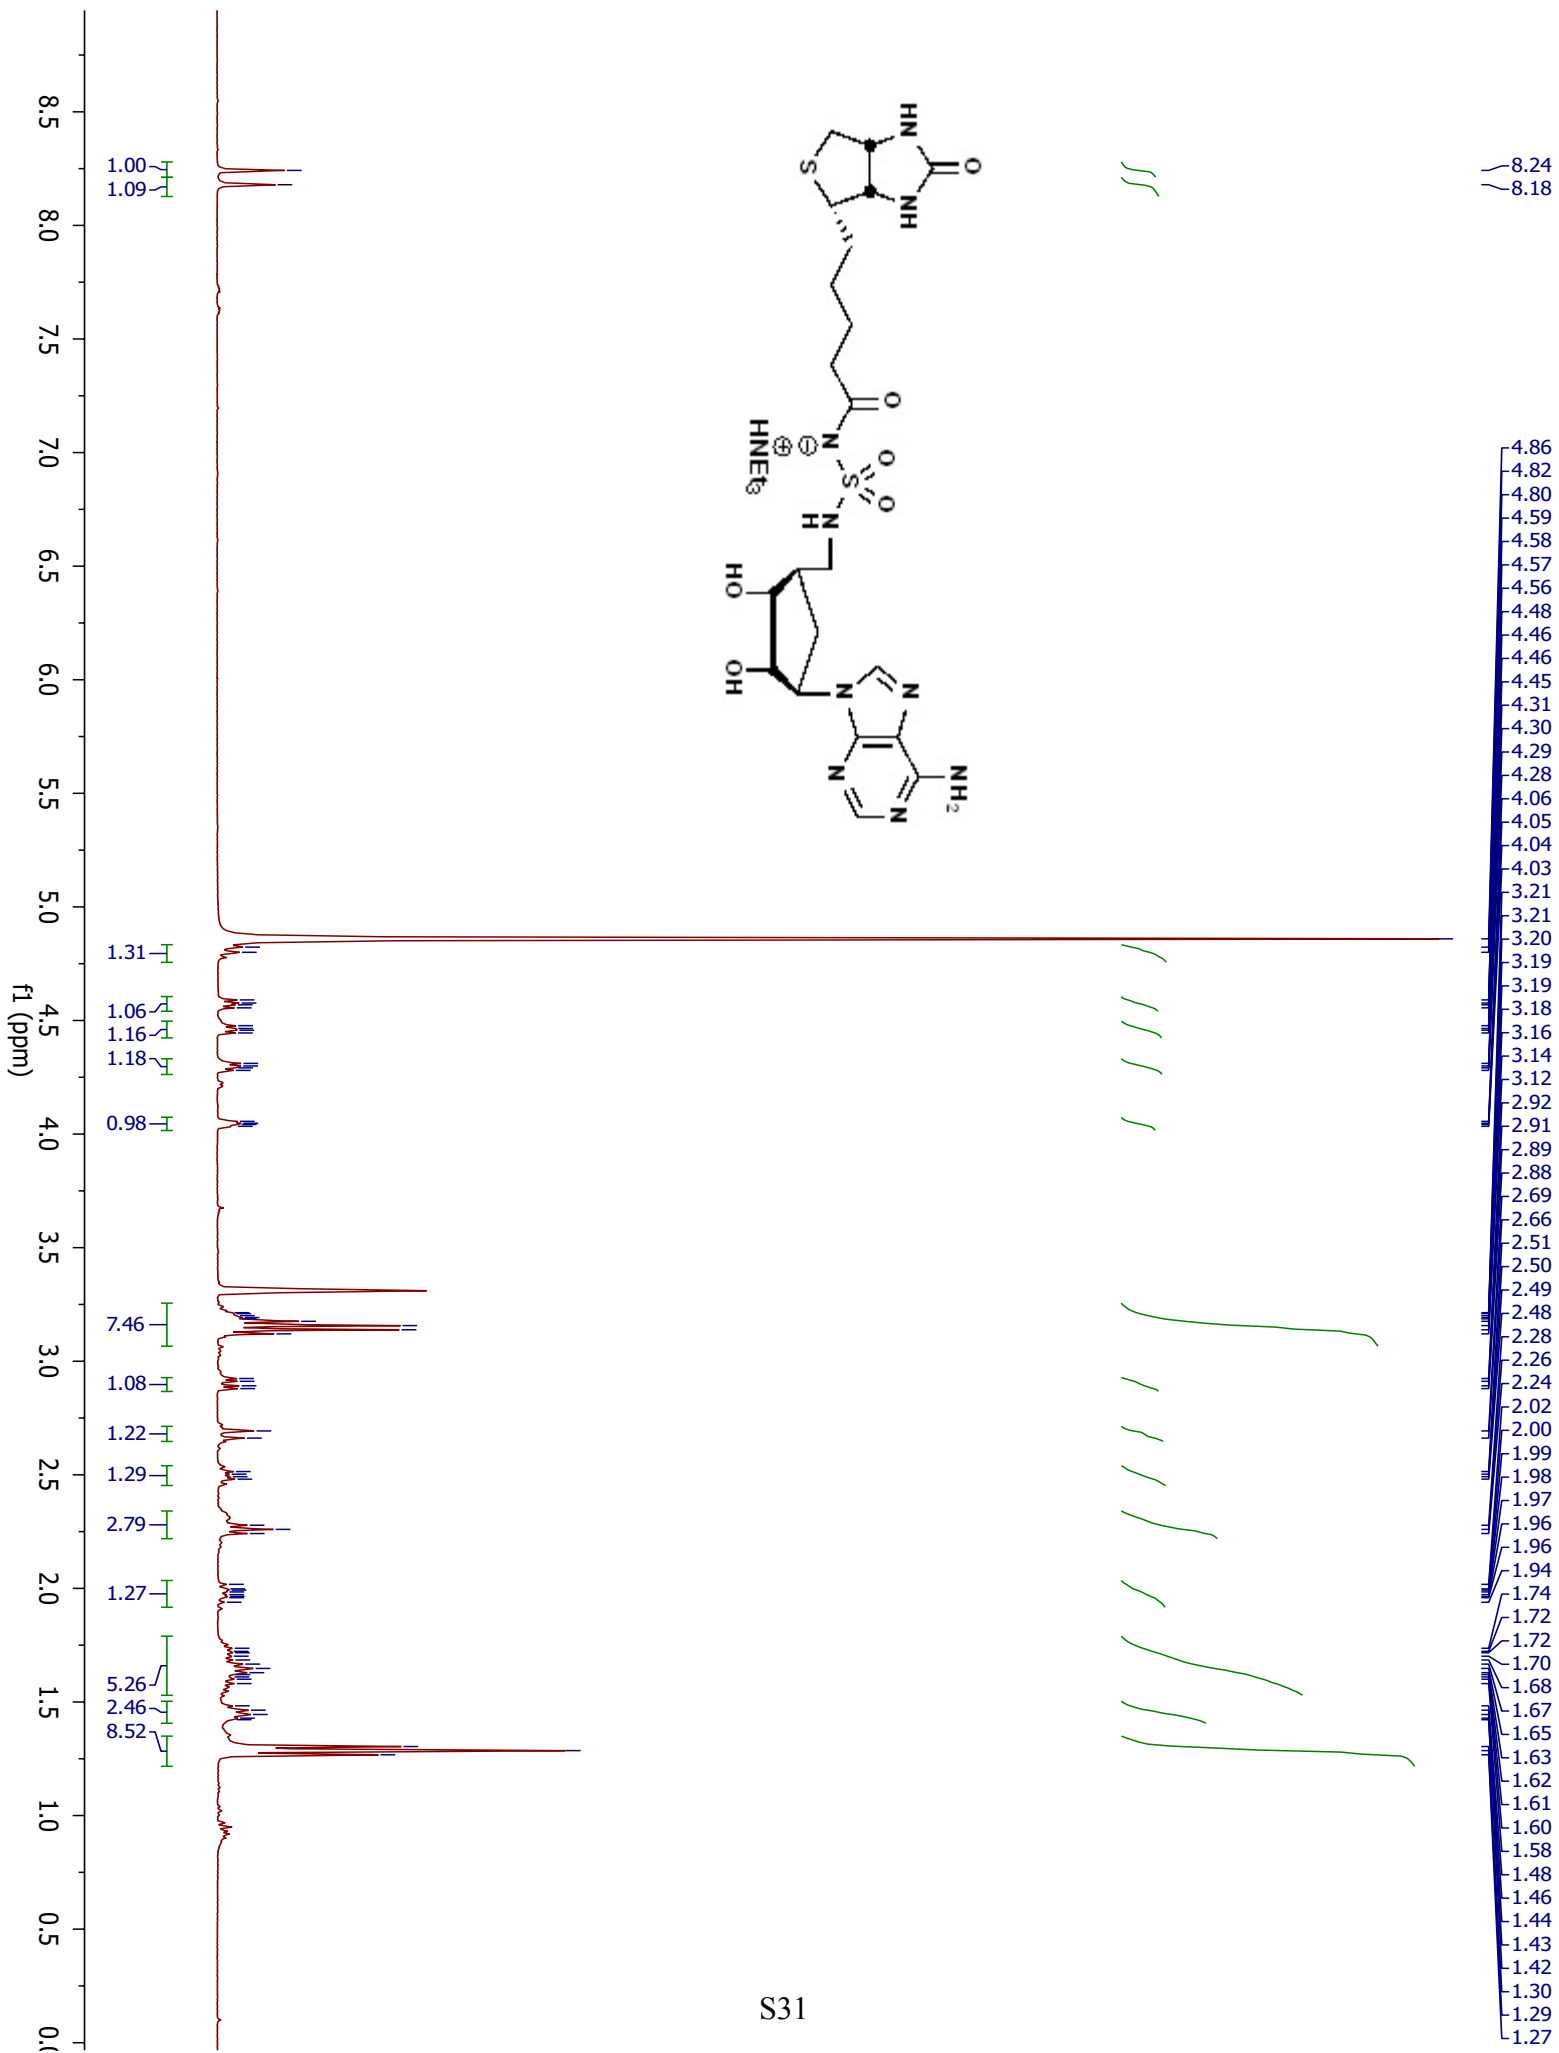

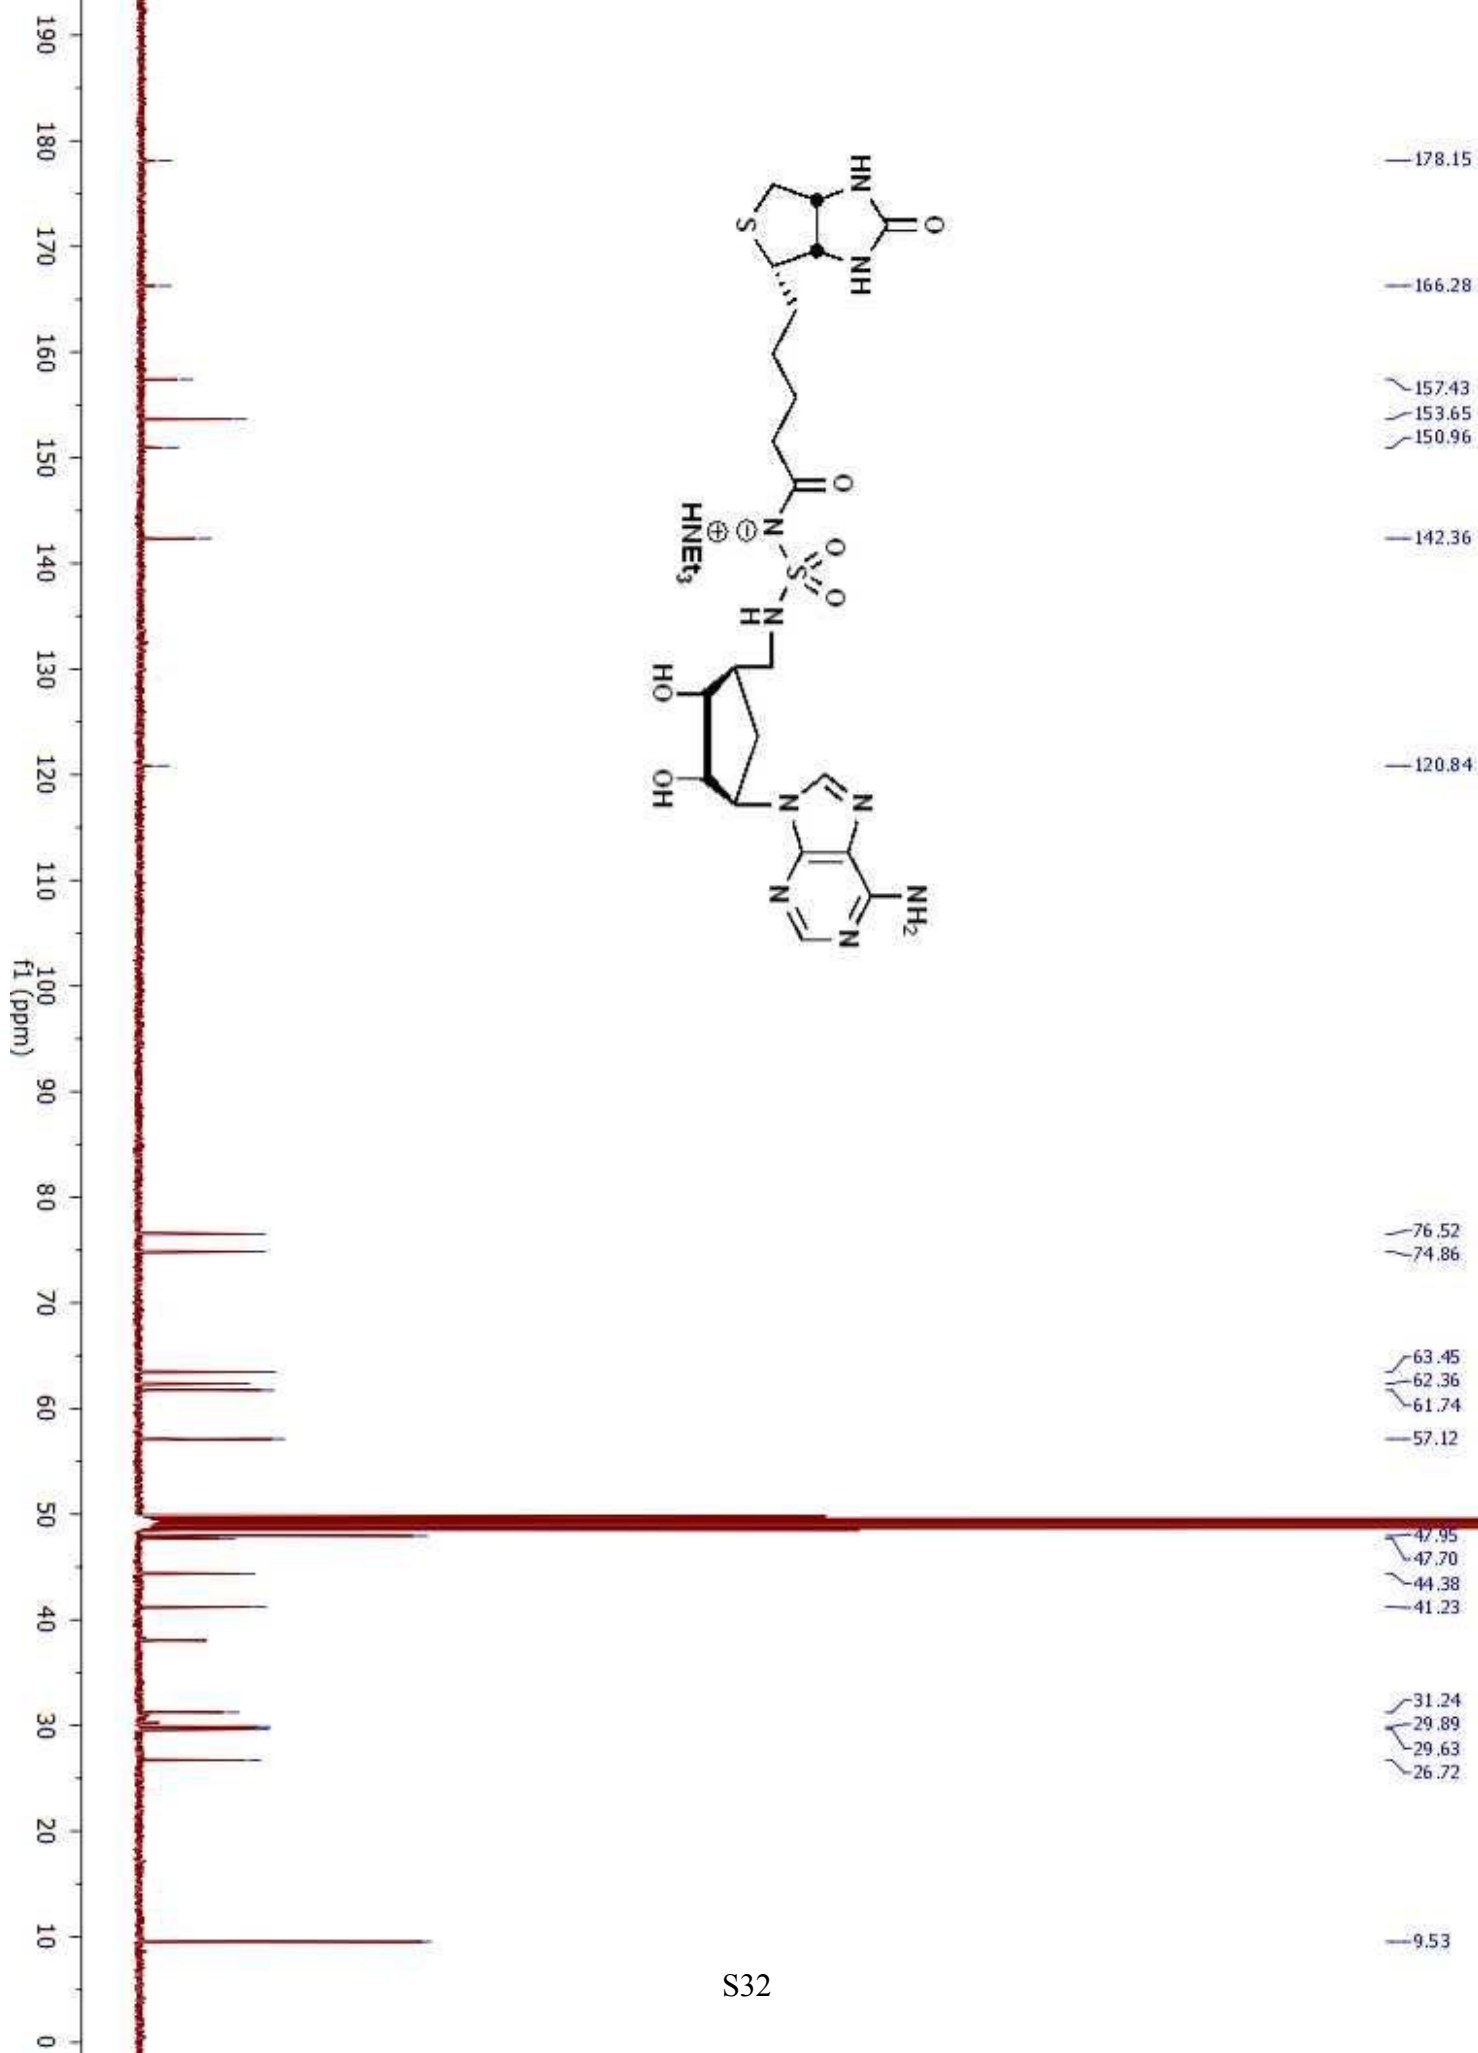



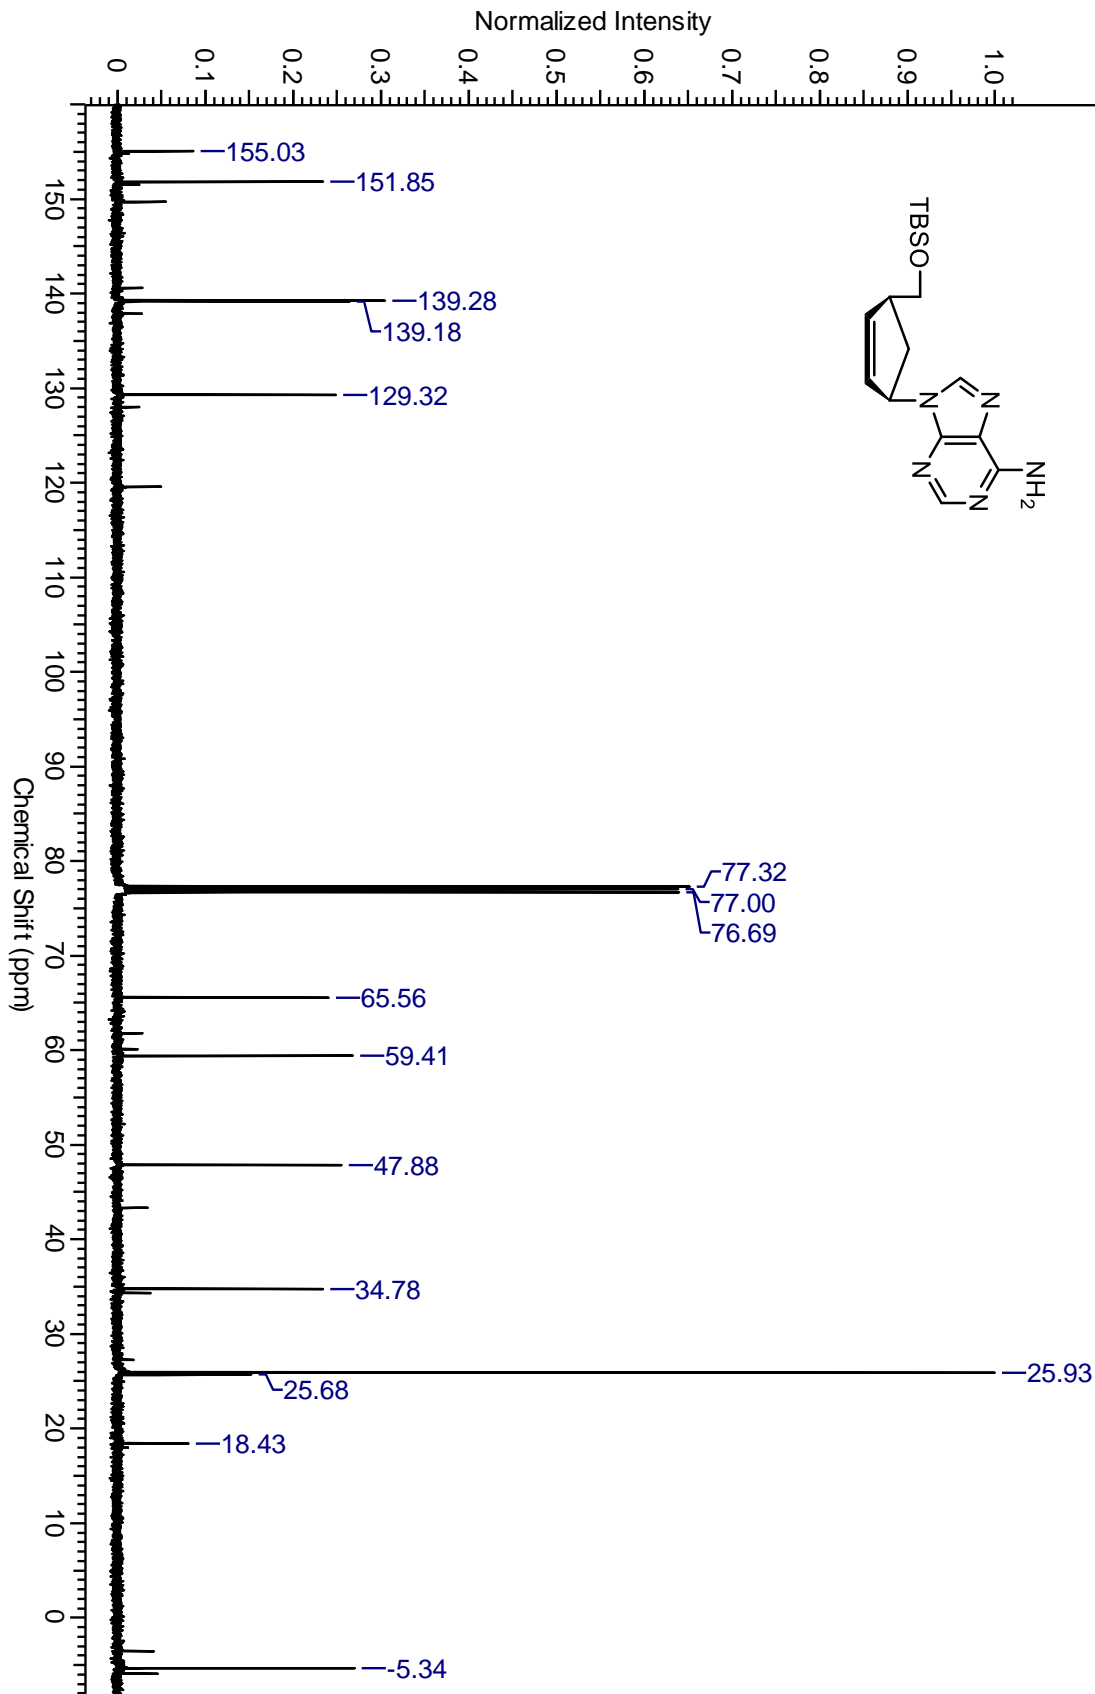

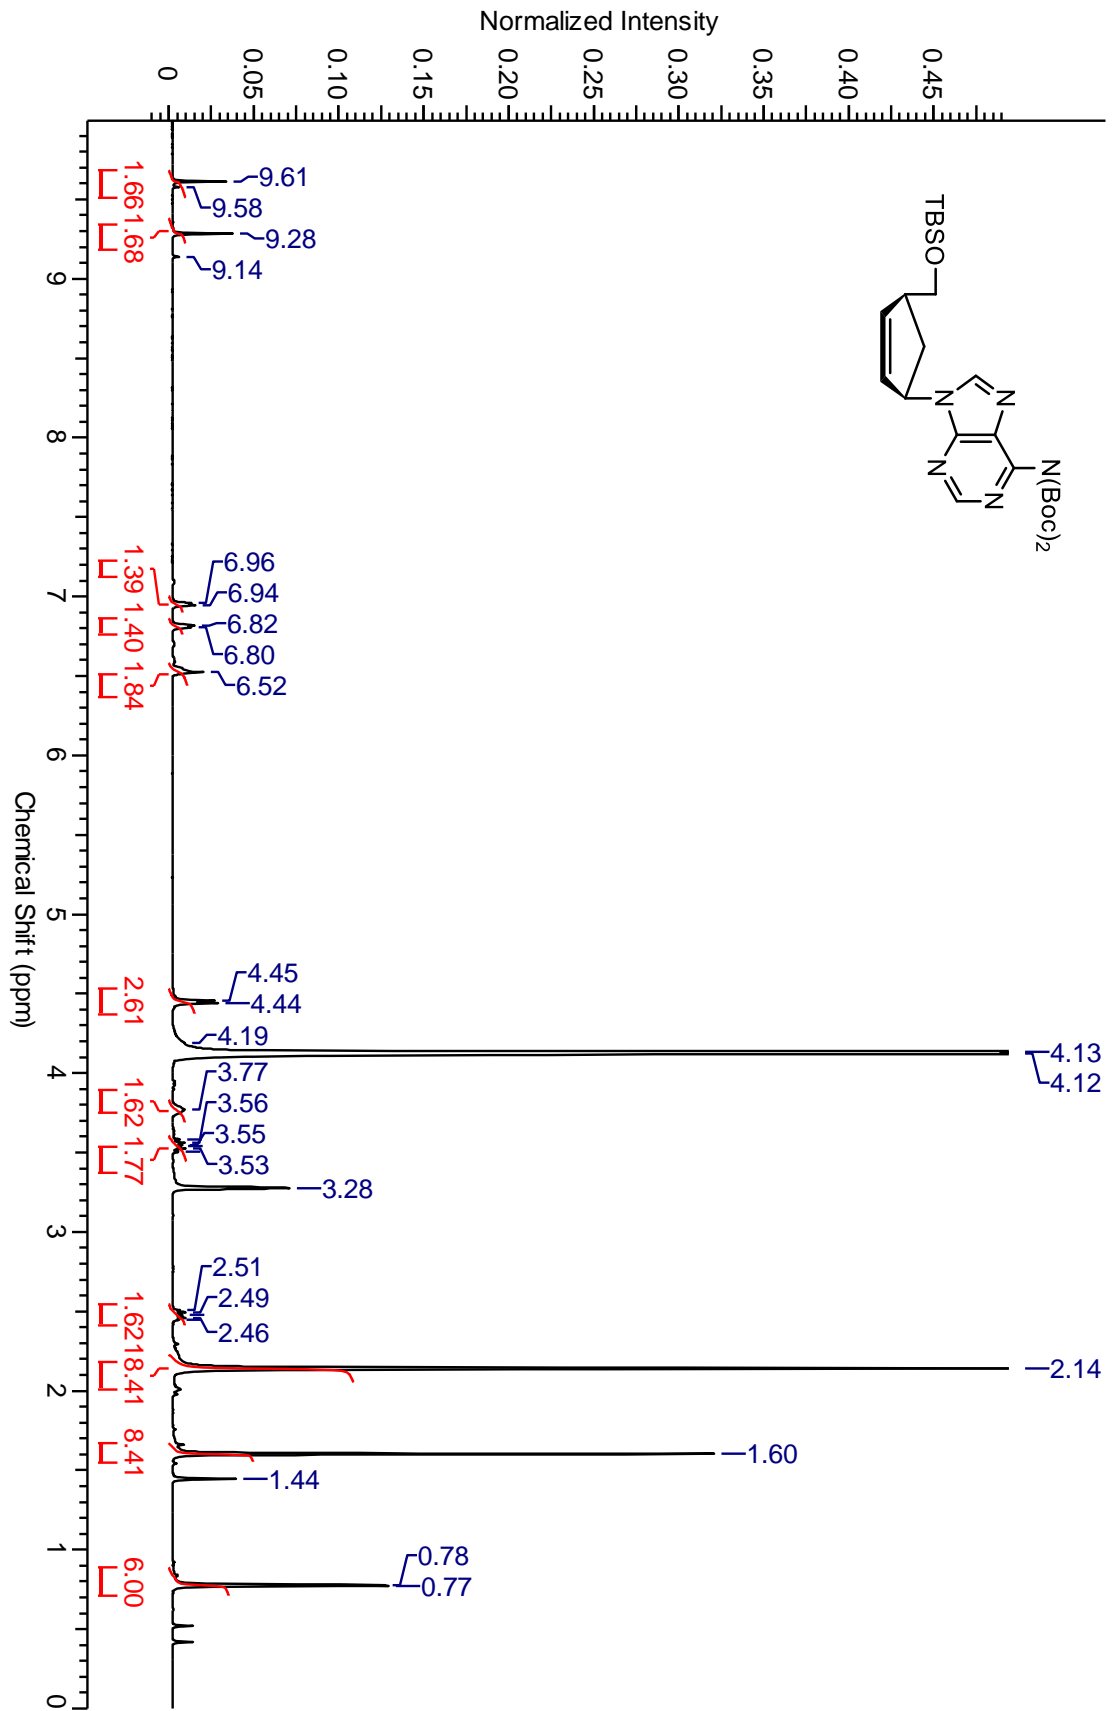



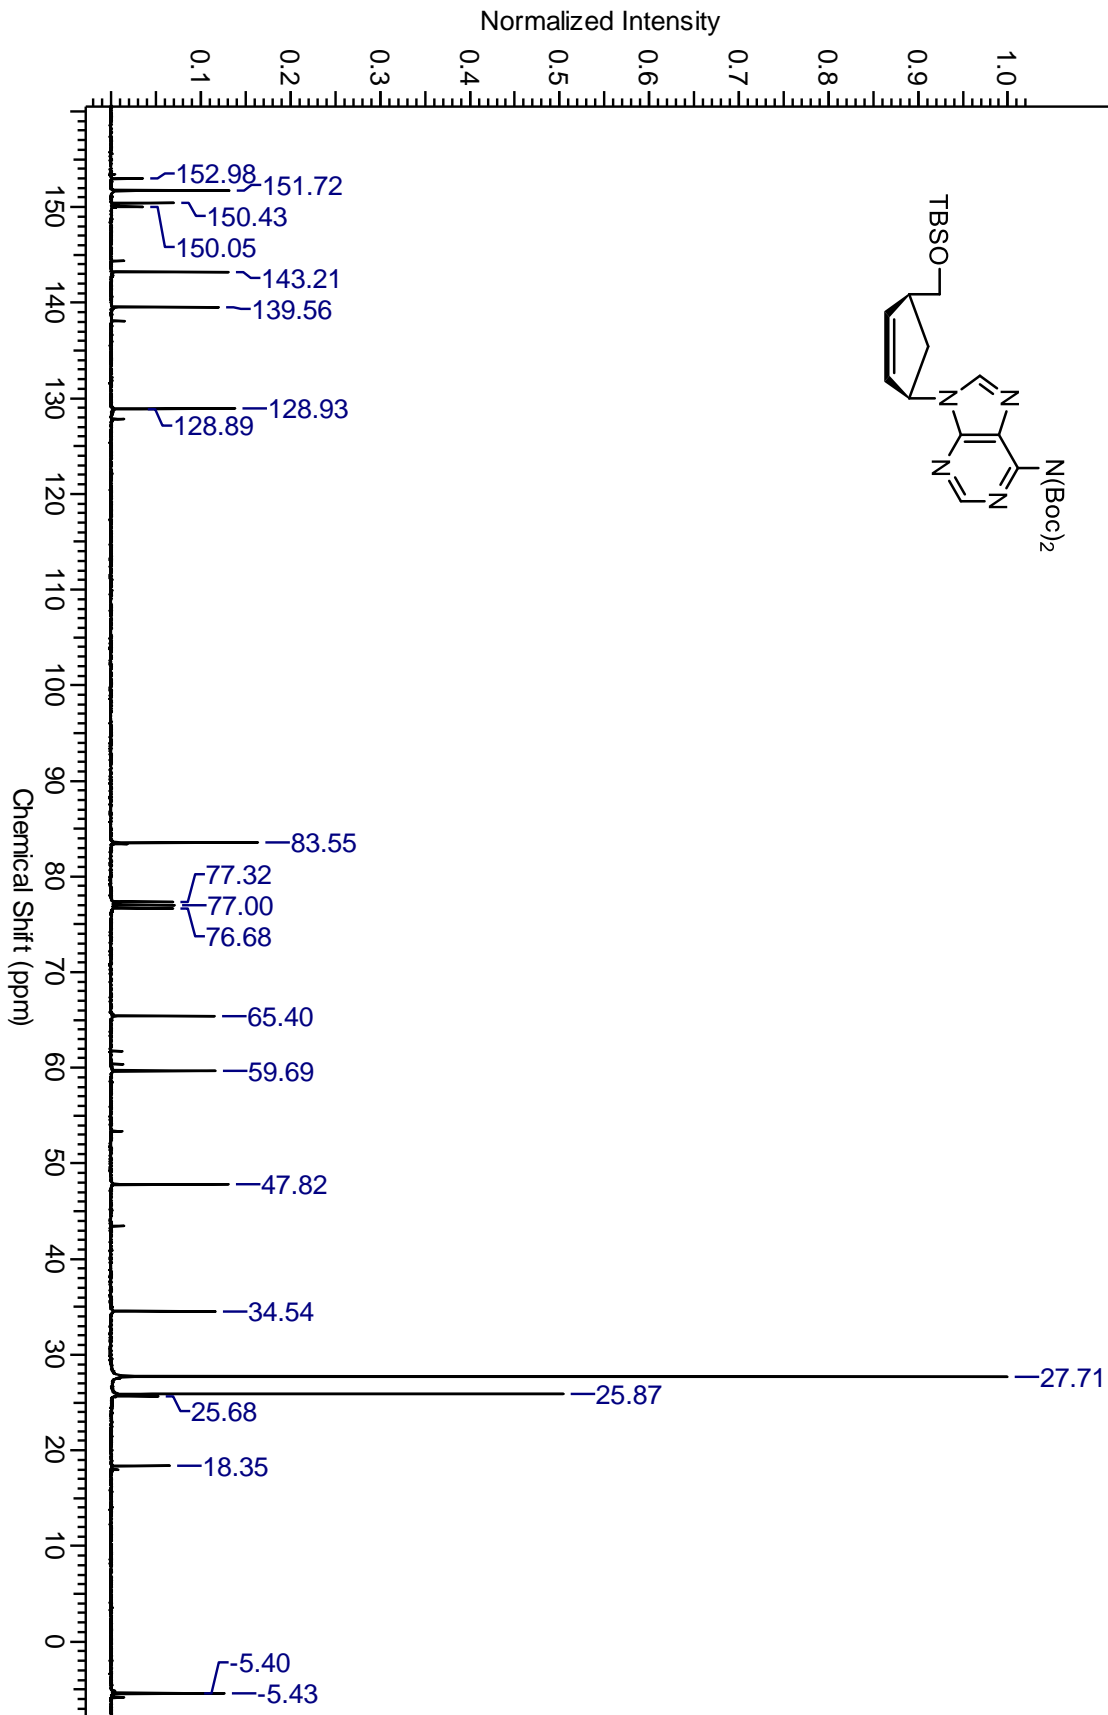

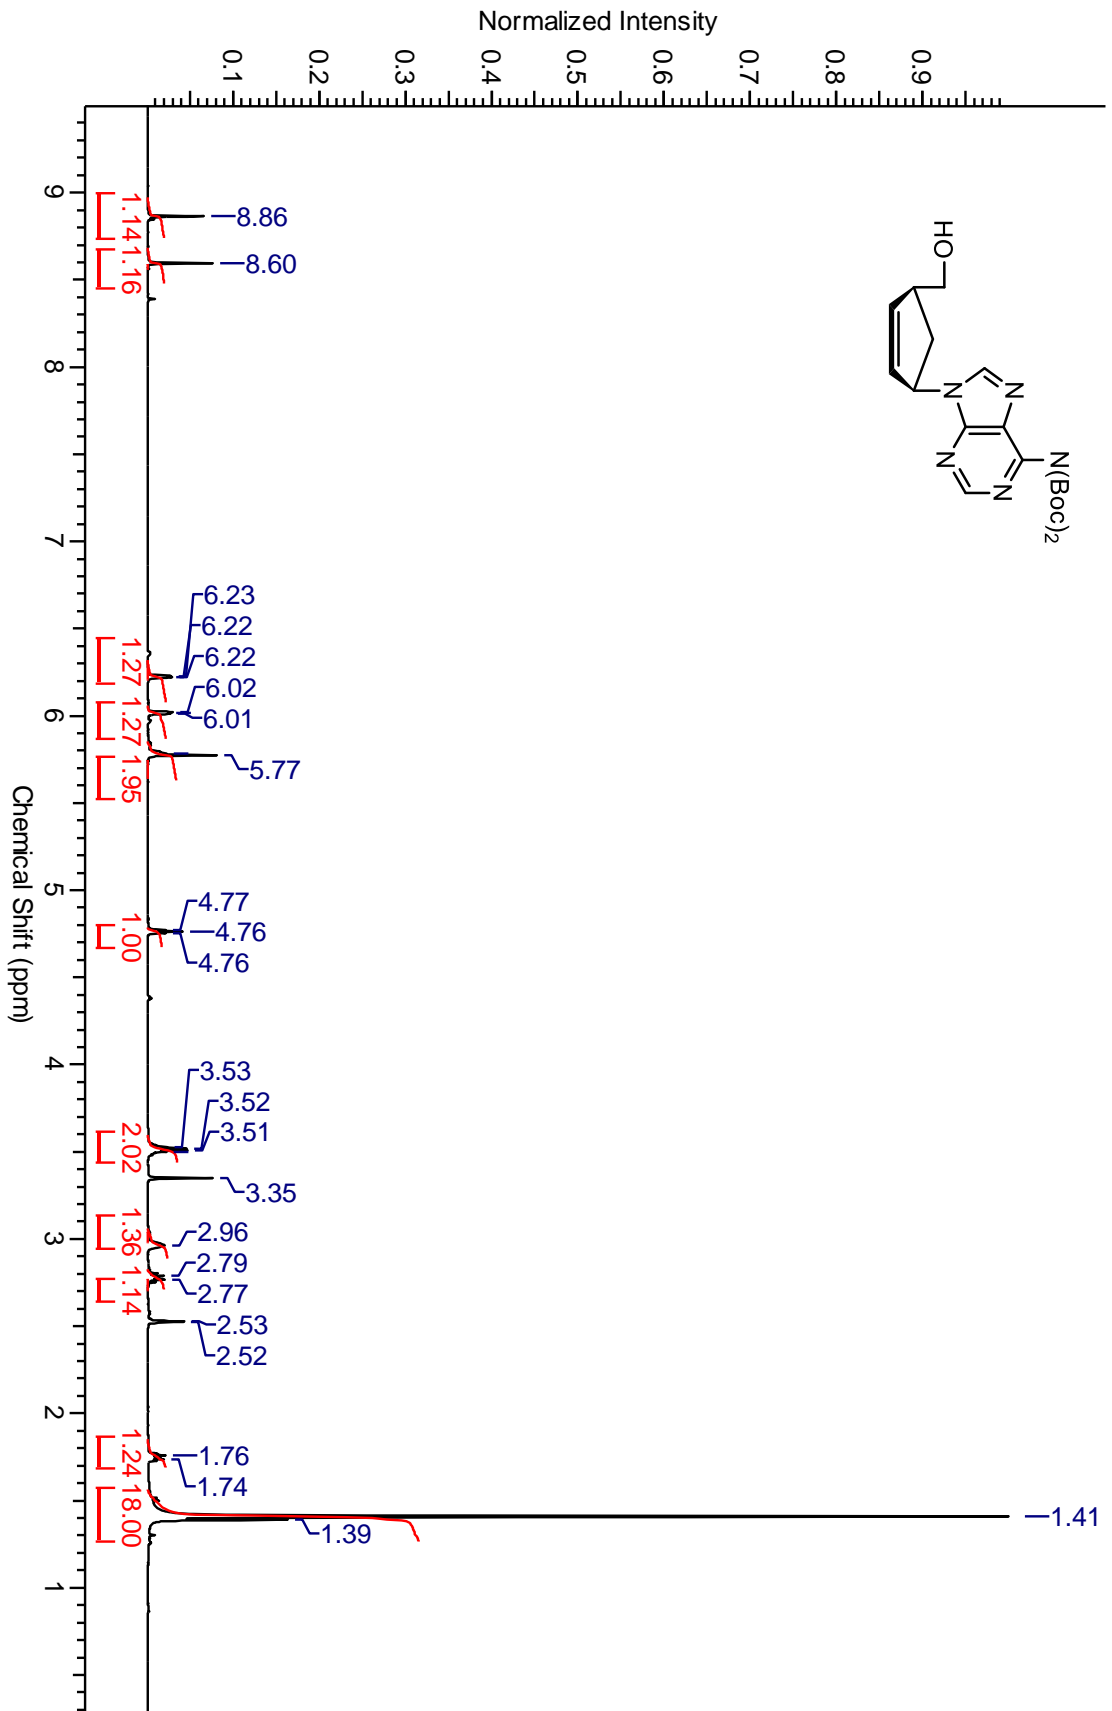

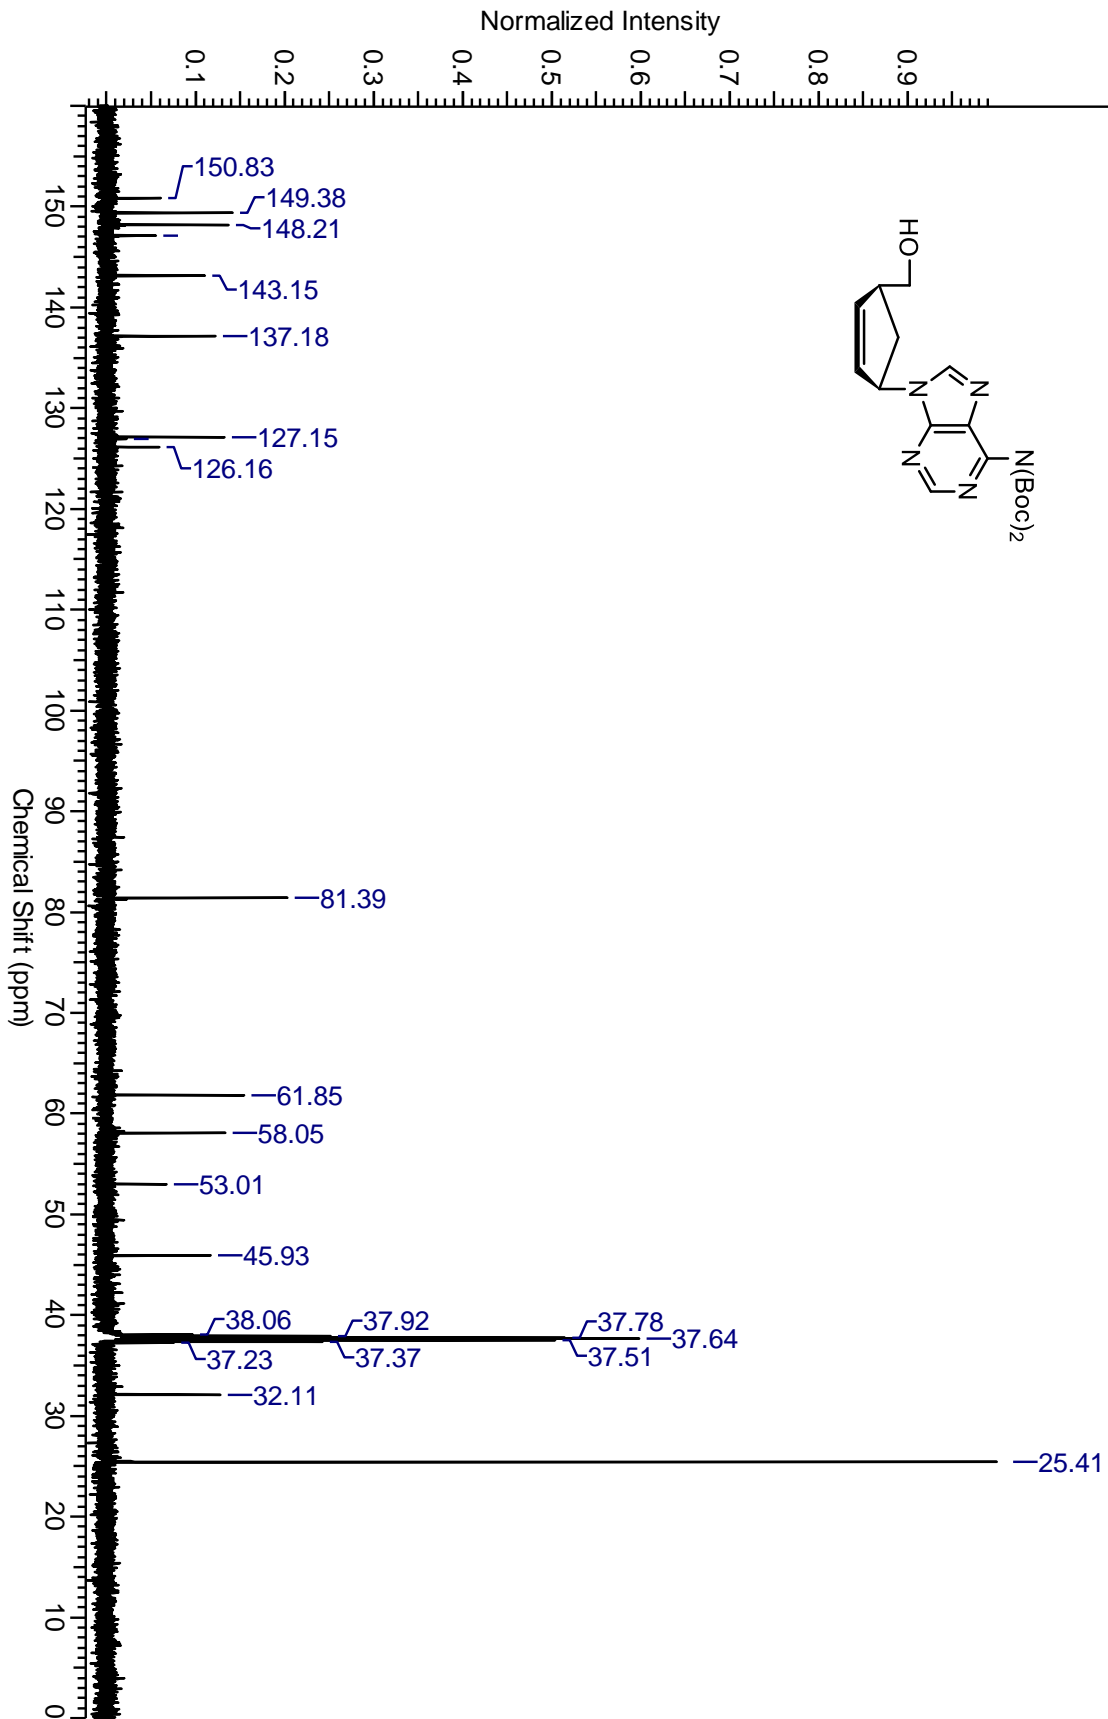

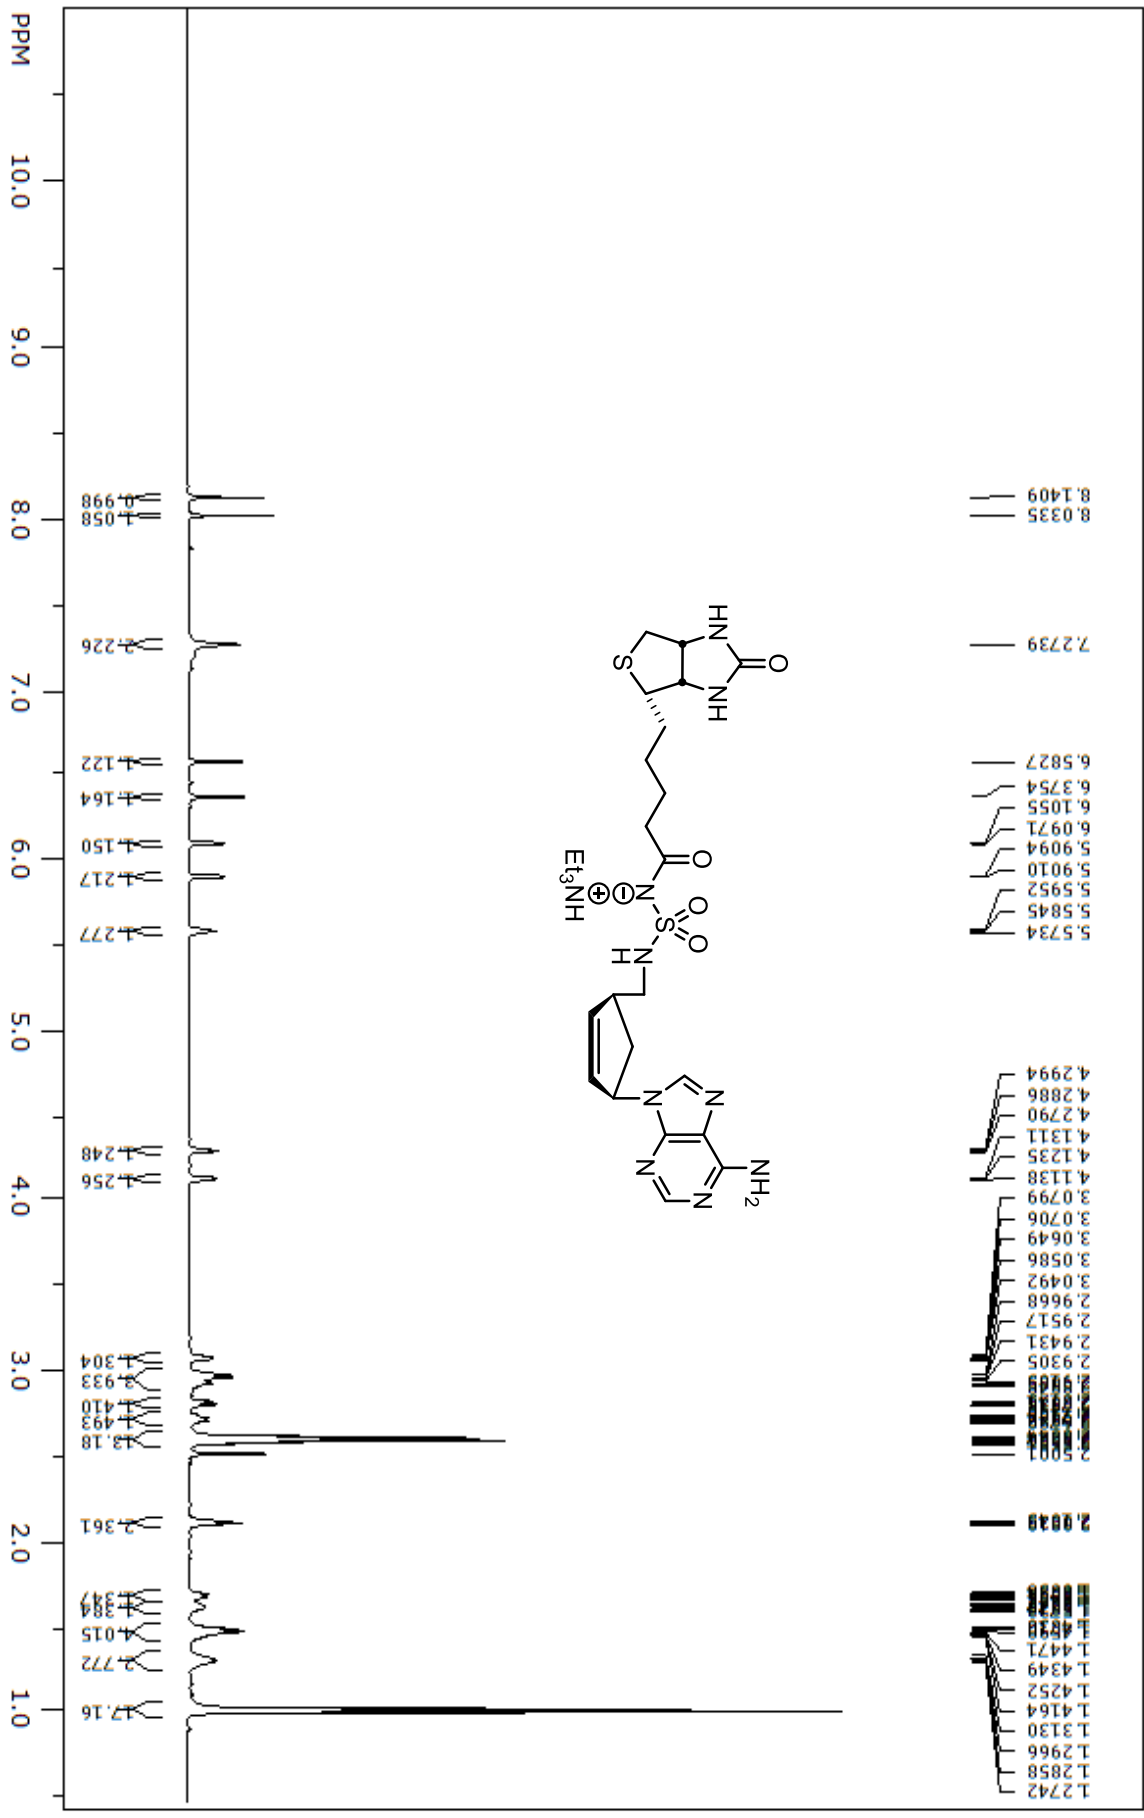

file: ...TENYL-NUCLEOSIDE\_PROTON\_01.fid\fid block# 1 expt: "s2pul"  
 transmitter freq.: 599.672148 MHz  
 time domain size: 32768 points  
 width: 9615.38 Hz = 16.0344 ppm = 0.293438 Hz/pt  
 number of scans: 64

freq. of 0 ppm: 599.668532 MHz  
 processed size: 32768 complex points  
 LB: 0.000 GF: 0.0000  
 Hz/cm: 253.846 ppm/cm: 0.42331

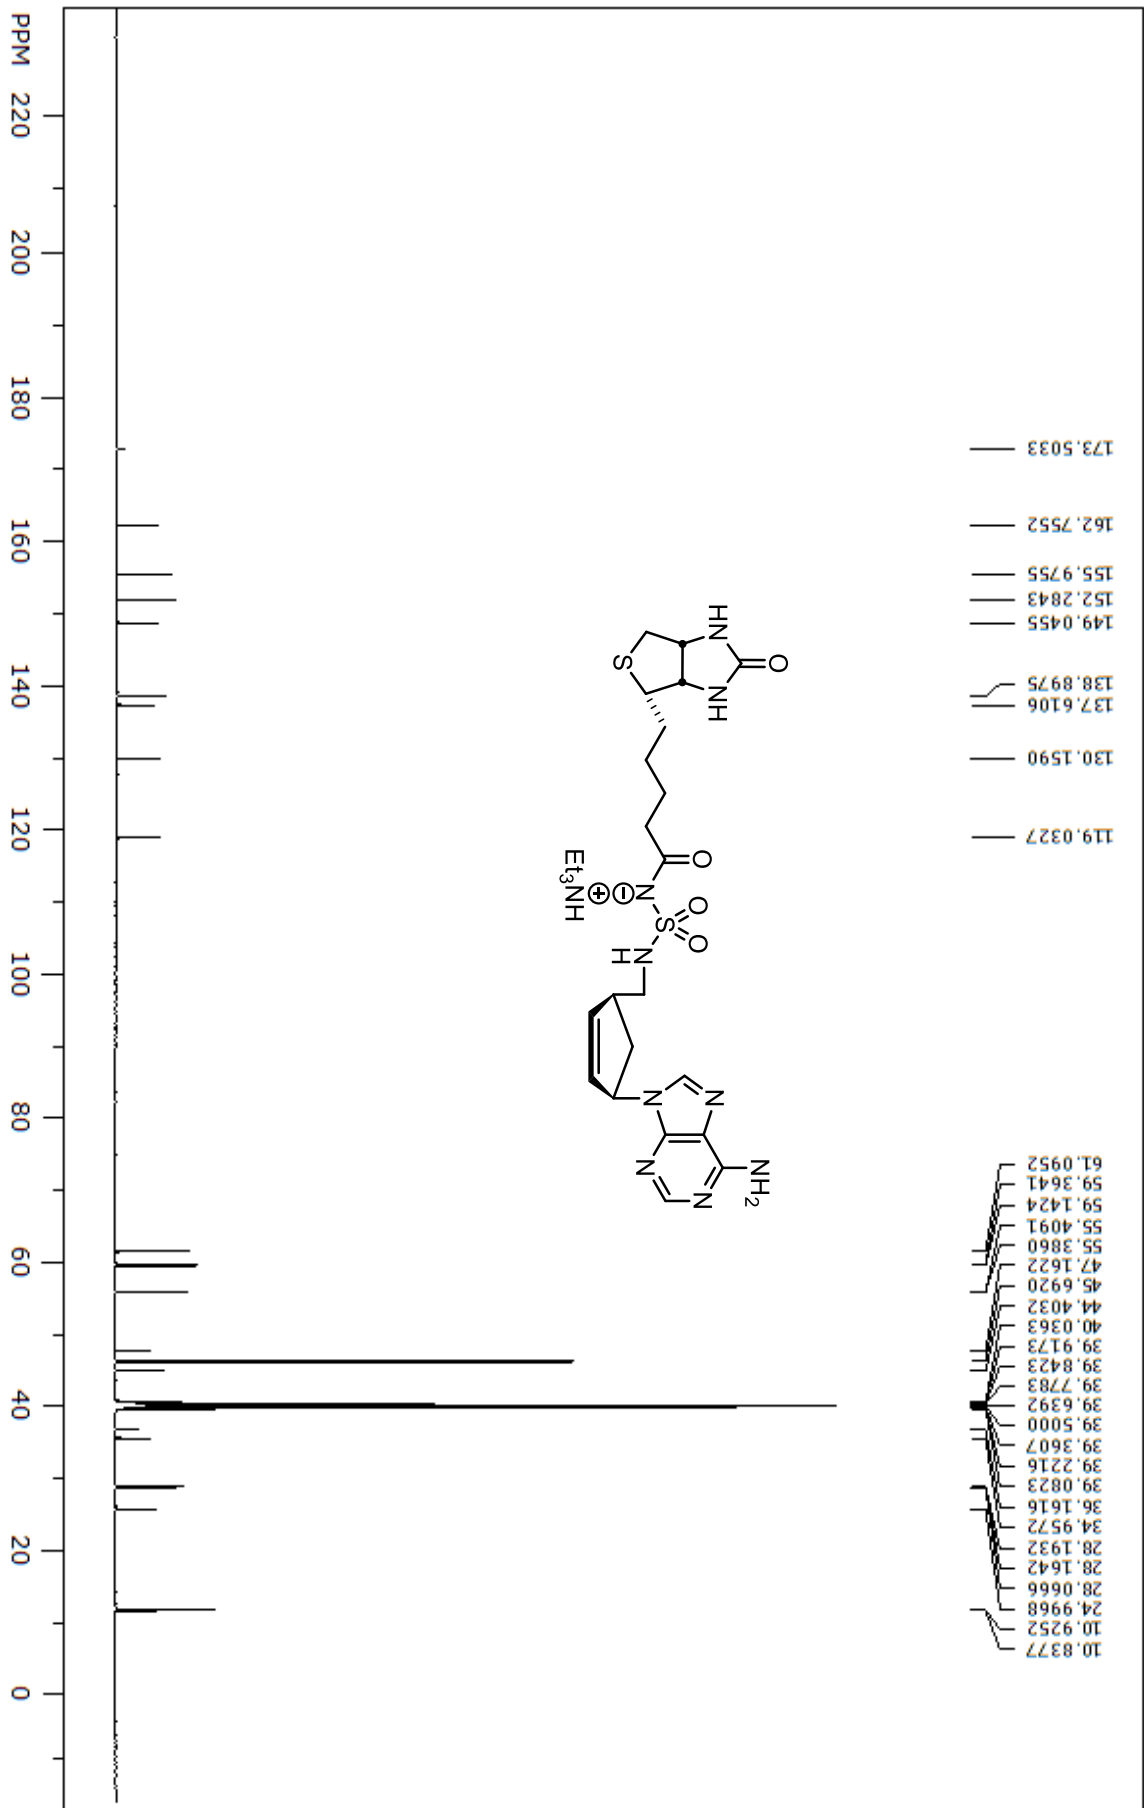

file: ...SK-02-297-CARBON\_CARBON\_01.fid\fid block# 1 expt: "s2pul"  
 transmitter freq.: 150.803363 MHz  
 time domain size: 65536 points  
 width: 37878.79 Hz = 251.1800 ppm = 0.577984 Hz/pt  
 number of scans: 24000

freq. of 0 ppm: 150.786846 MHz  
 processed size: 65536 complex points  
 LB: 0.000 GF: 0.0000  
 Hz/cm: 1515.152 ppm/cm: 10.04720

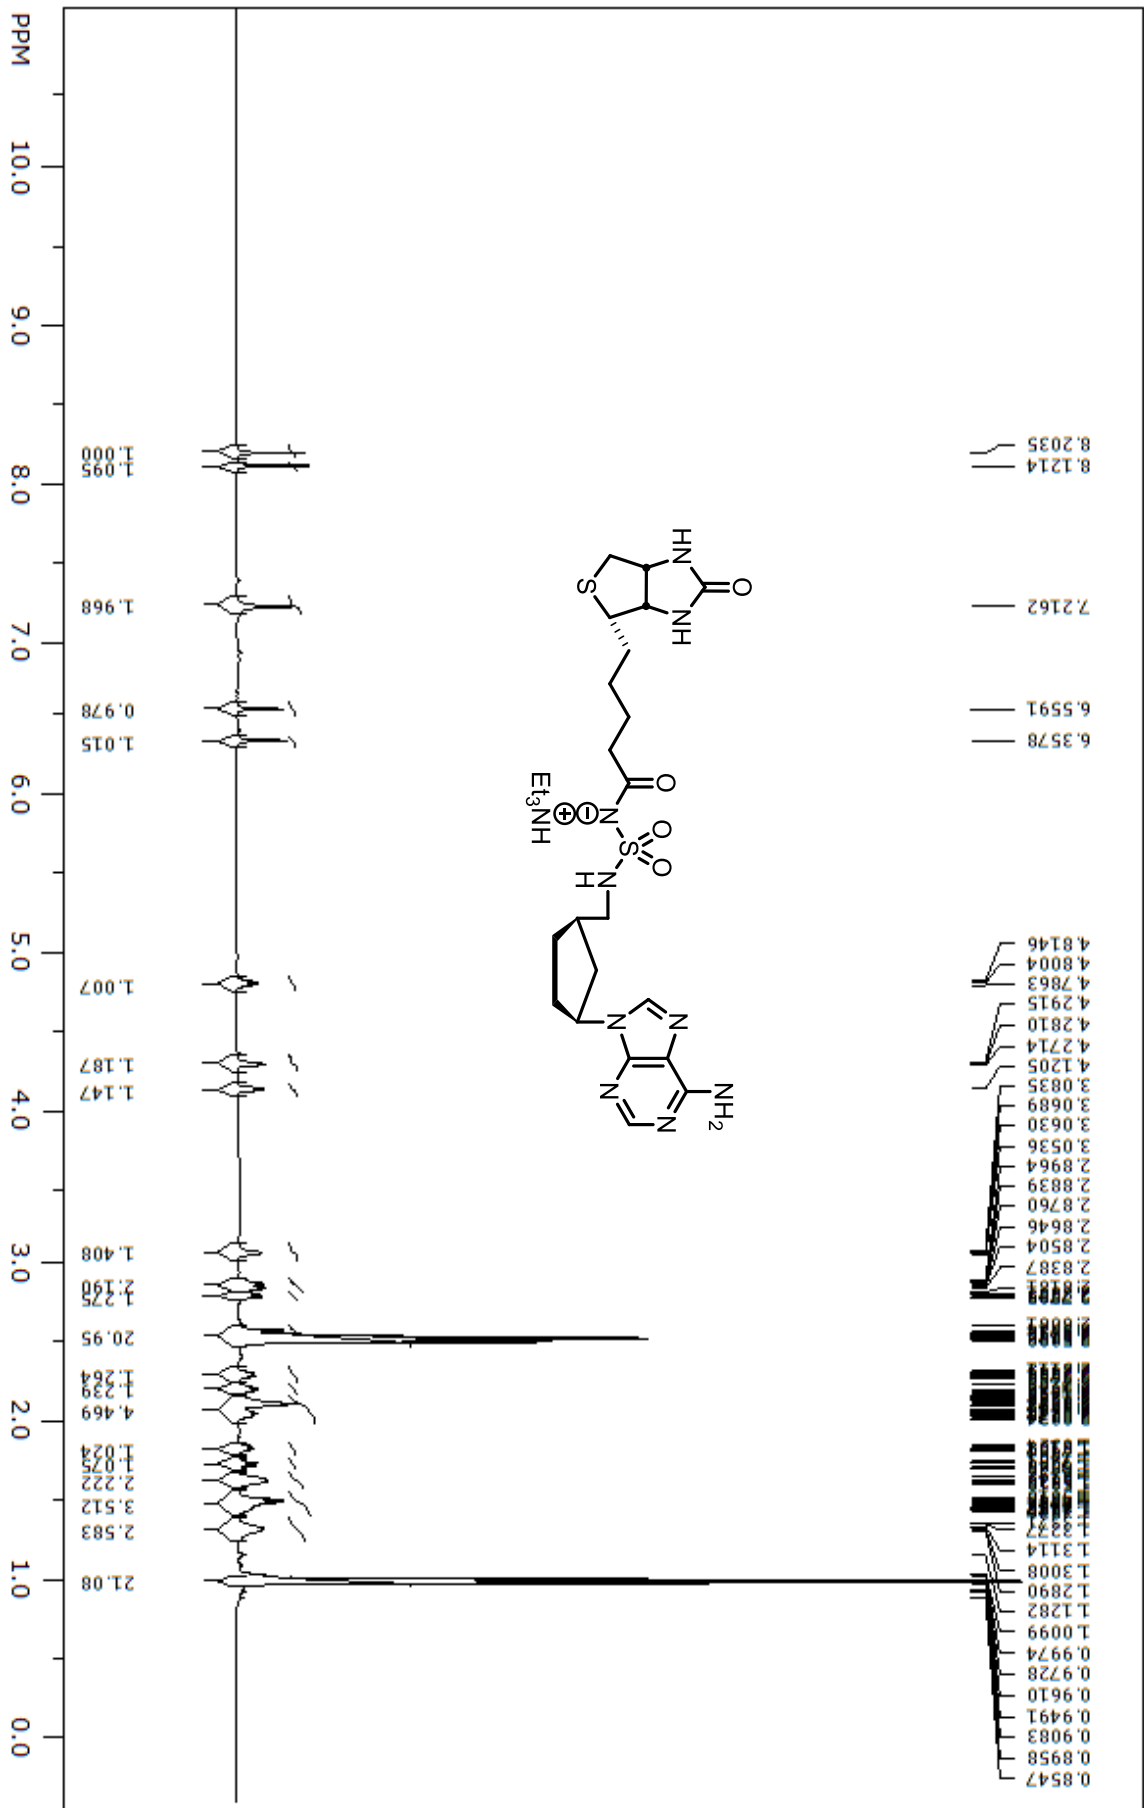

file: ...ATURATED-BIO-AMS\_PROTON\_01.fid\fid block# 1 expt: "s2pu1"  
 transmitter freq.: 599.672148 MHz  
 time domain size: 32768 points  
 width: 9615.38 Hz = 16.0344 ppm = 0.293438 Hz/pt  
 number of scans: 64

freq. of 0 ppm: 599.668534 MHz  
 processed size: 32768 complex points  
 LB: 0.000 GF: 0.0000  
 Hz/cm: 276.269 ppm/cm: 0.46070

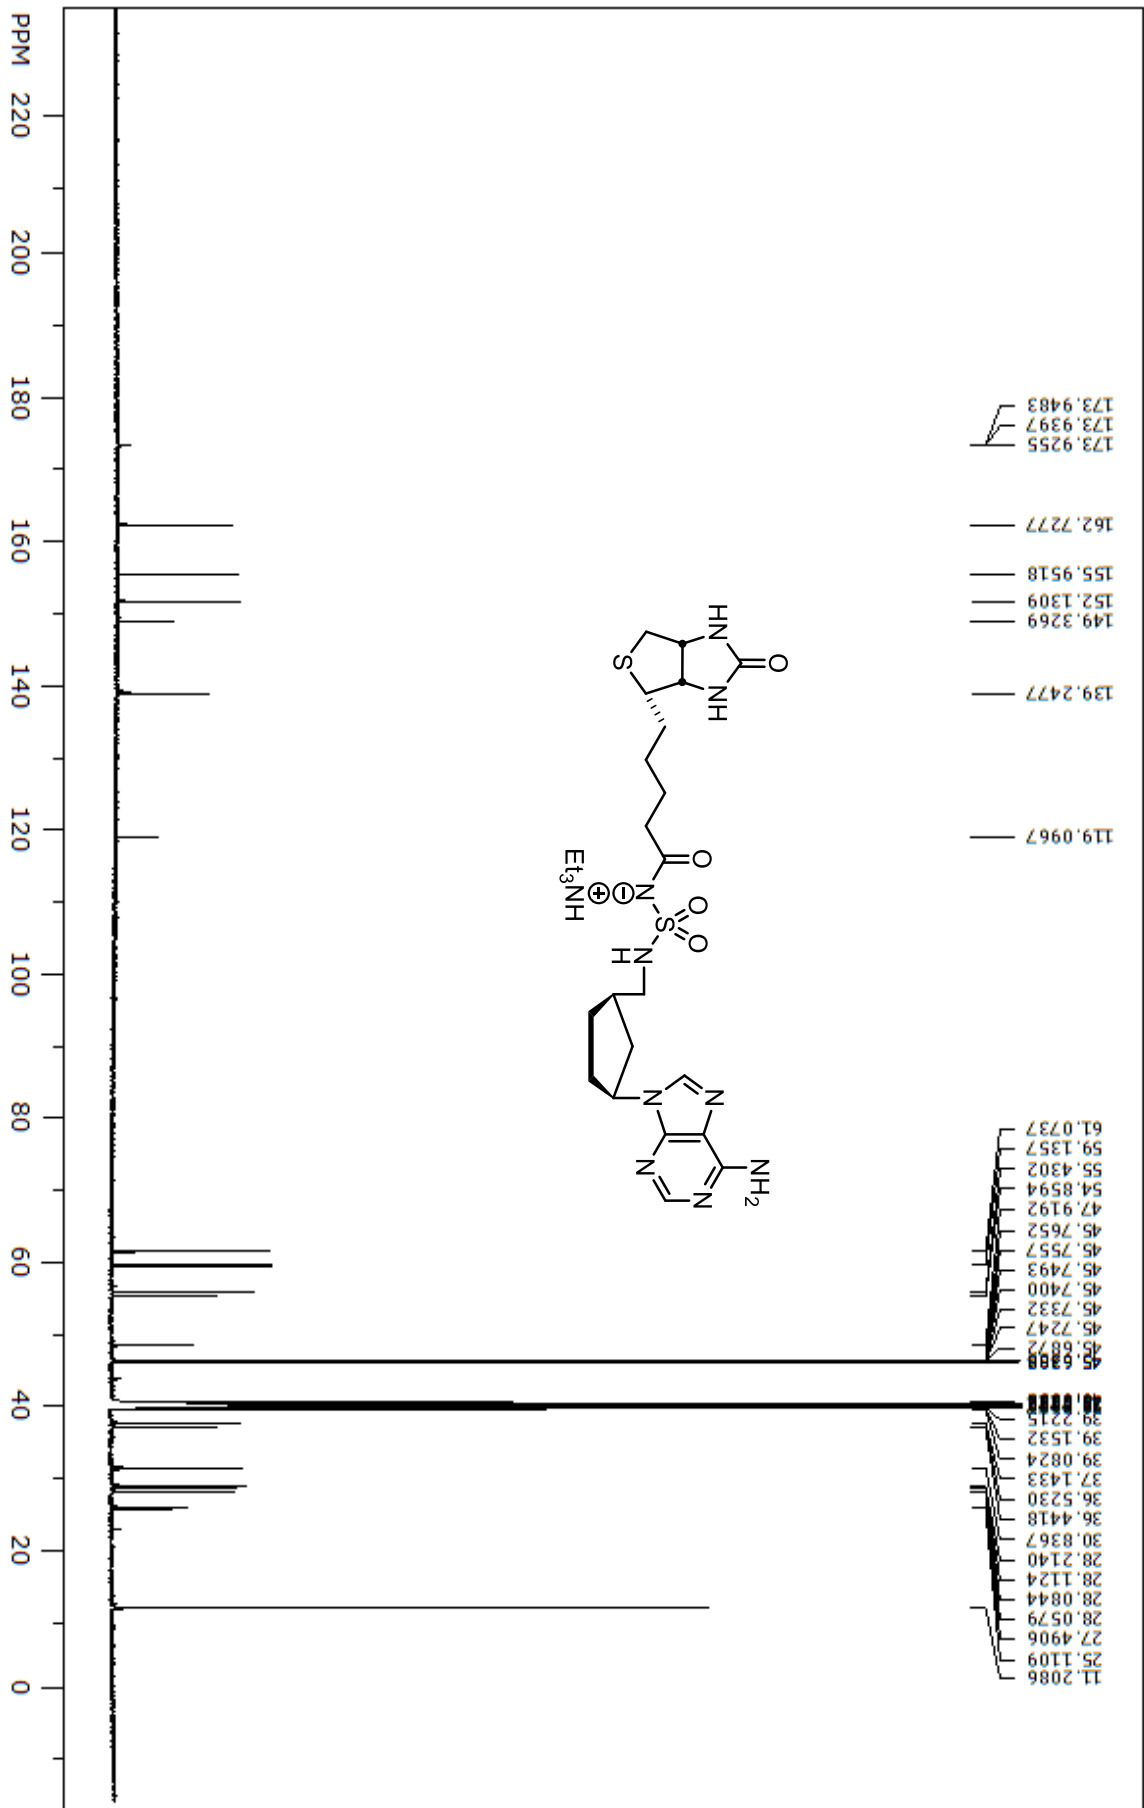

file: ...SK-02-291-CARBON\_CARBON\_01.fid\fid block# 1 expt: "s2pul"  
 transmitter freq.: 150.803363 MHz  
 time domain size: 65536 points  
 width: 37878.79 Hz = 251.1800 ppm = 0.577984 Hz/pt  
 number of scans: 24000

freq. of 0 ppm: 150.786846 MHz  
 processed size: 65536 complex points  
 LB: 0.000 GF: 0.0000  
 Hz/cm: 1515.152 ppm/cm: 10.04720

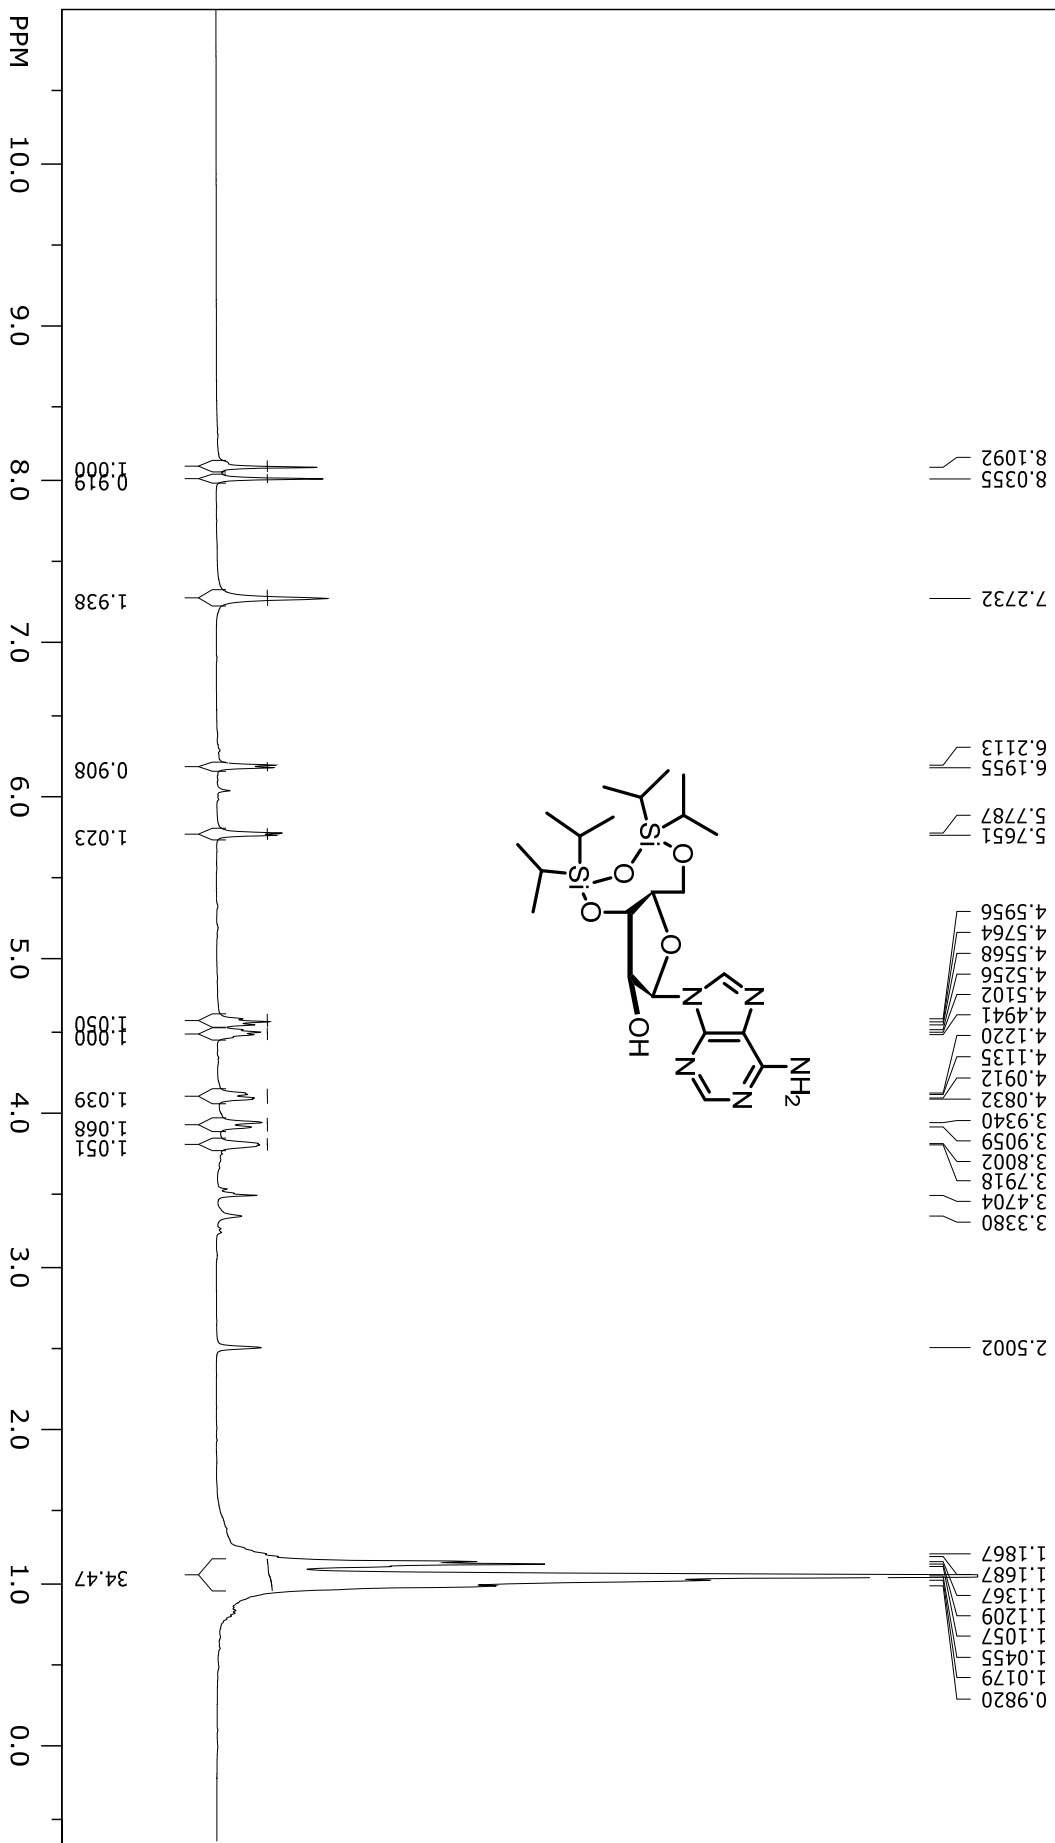

file: ...1-051-PROTON-2\_20131029\_01.fid\fid block# 1 expt: "s2pul"  
 transmitter freq.: 399.751031 MHz  
 time domain size: 32768 points  
 width: 6410.26 Hz = 16.0356 ppm = 0.195626 Hz/pt  
 number of scans: 32

freq. of 0 ppm: 399.748619 MHz  
 processed size: 32768 complex points  
 LB: 0.000 GF: 0.0000  
 Hz/cm: 186.649 ppm/cm: 0.46691



file: ...1-051-CARBON-2\_20131029\_01.fid\fid block# 1 expt: "s2pu1"  
 transmitter freq.: 100.527931 MHz  
 time domain size: 65536 points  
 width: 25000.00 Hz = 248.6871 ppm = 0.381470 Hz/pt  
 number of scans: 550

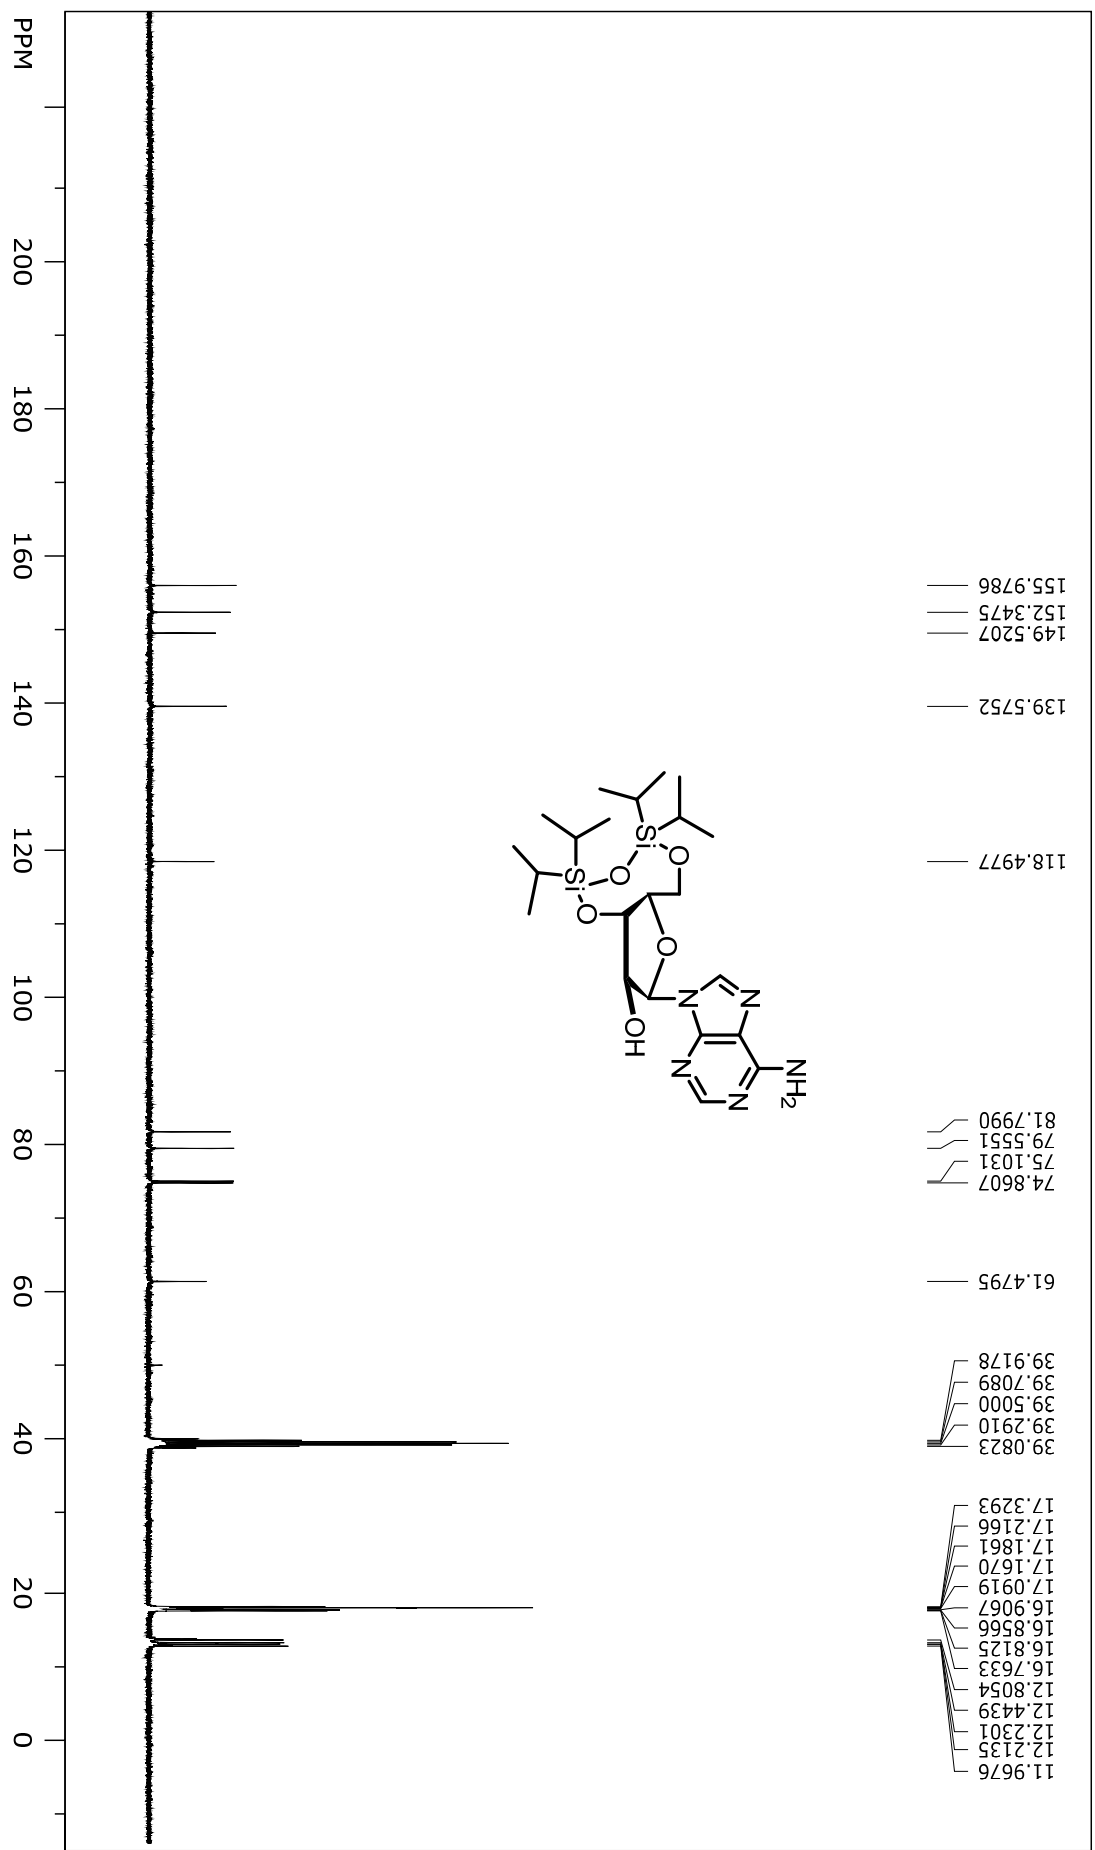

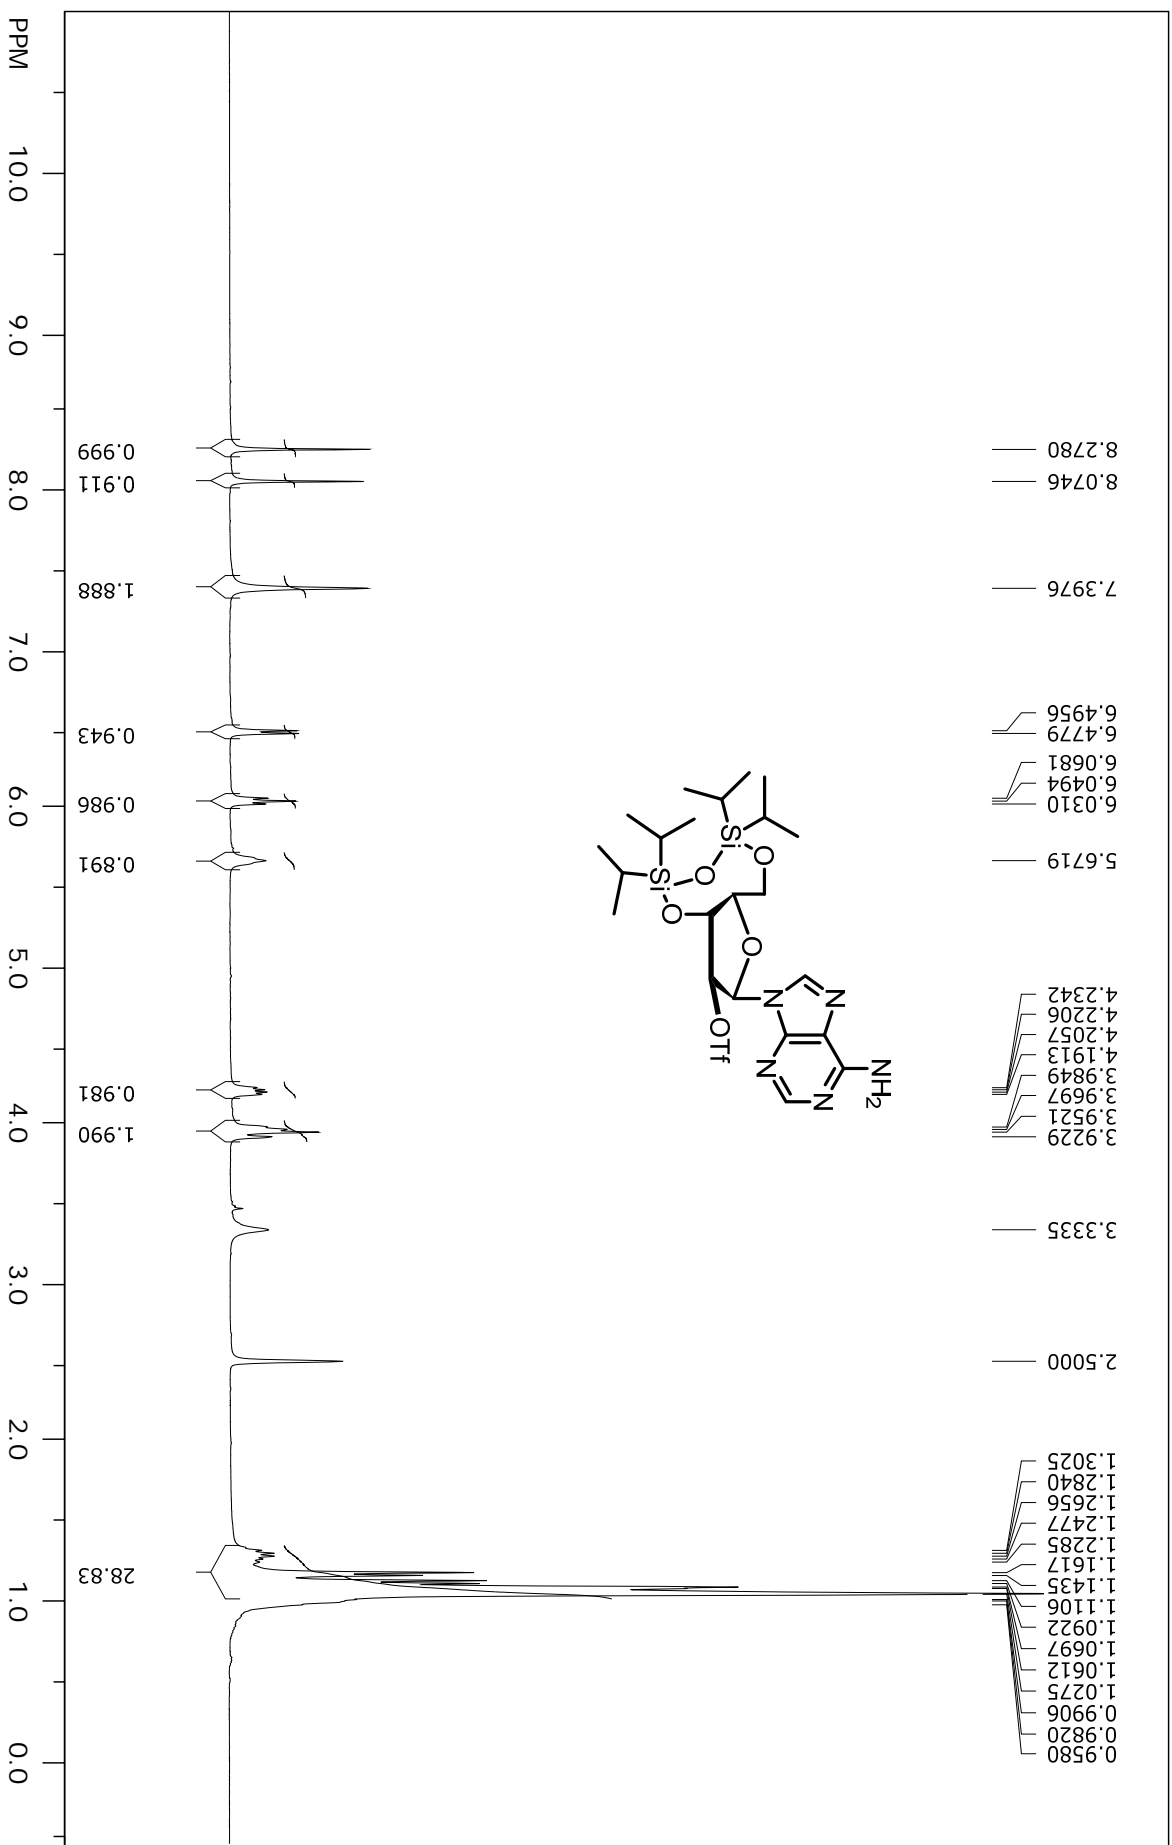

file: ...-01-055-PROTON\_20131030\_01.fid\fid block# 1 expt: "szpu1"  
 transmitter freq.: 399.751031 MHz  
 time domain size: 32768 points  
 width: 6410.26 Hz = 16.0356 ppm = 0.195626 Hz/pt  
 number of scans: 16

freq. of 0 ppm: 399.748620 MHz  
 processed size: 32768 complex points  
 LB: 0.000 GF: 0.0000  
 Hz/cm: 185.620 ppm/cm: 0.46434



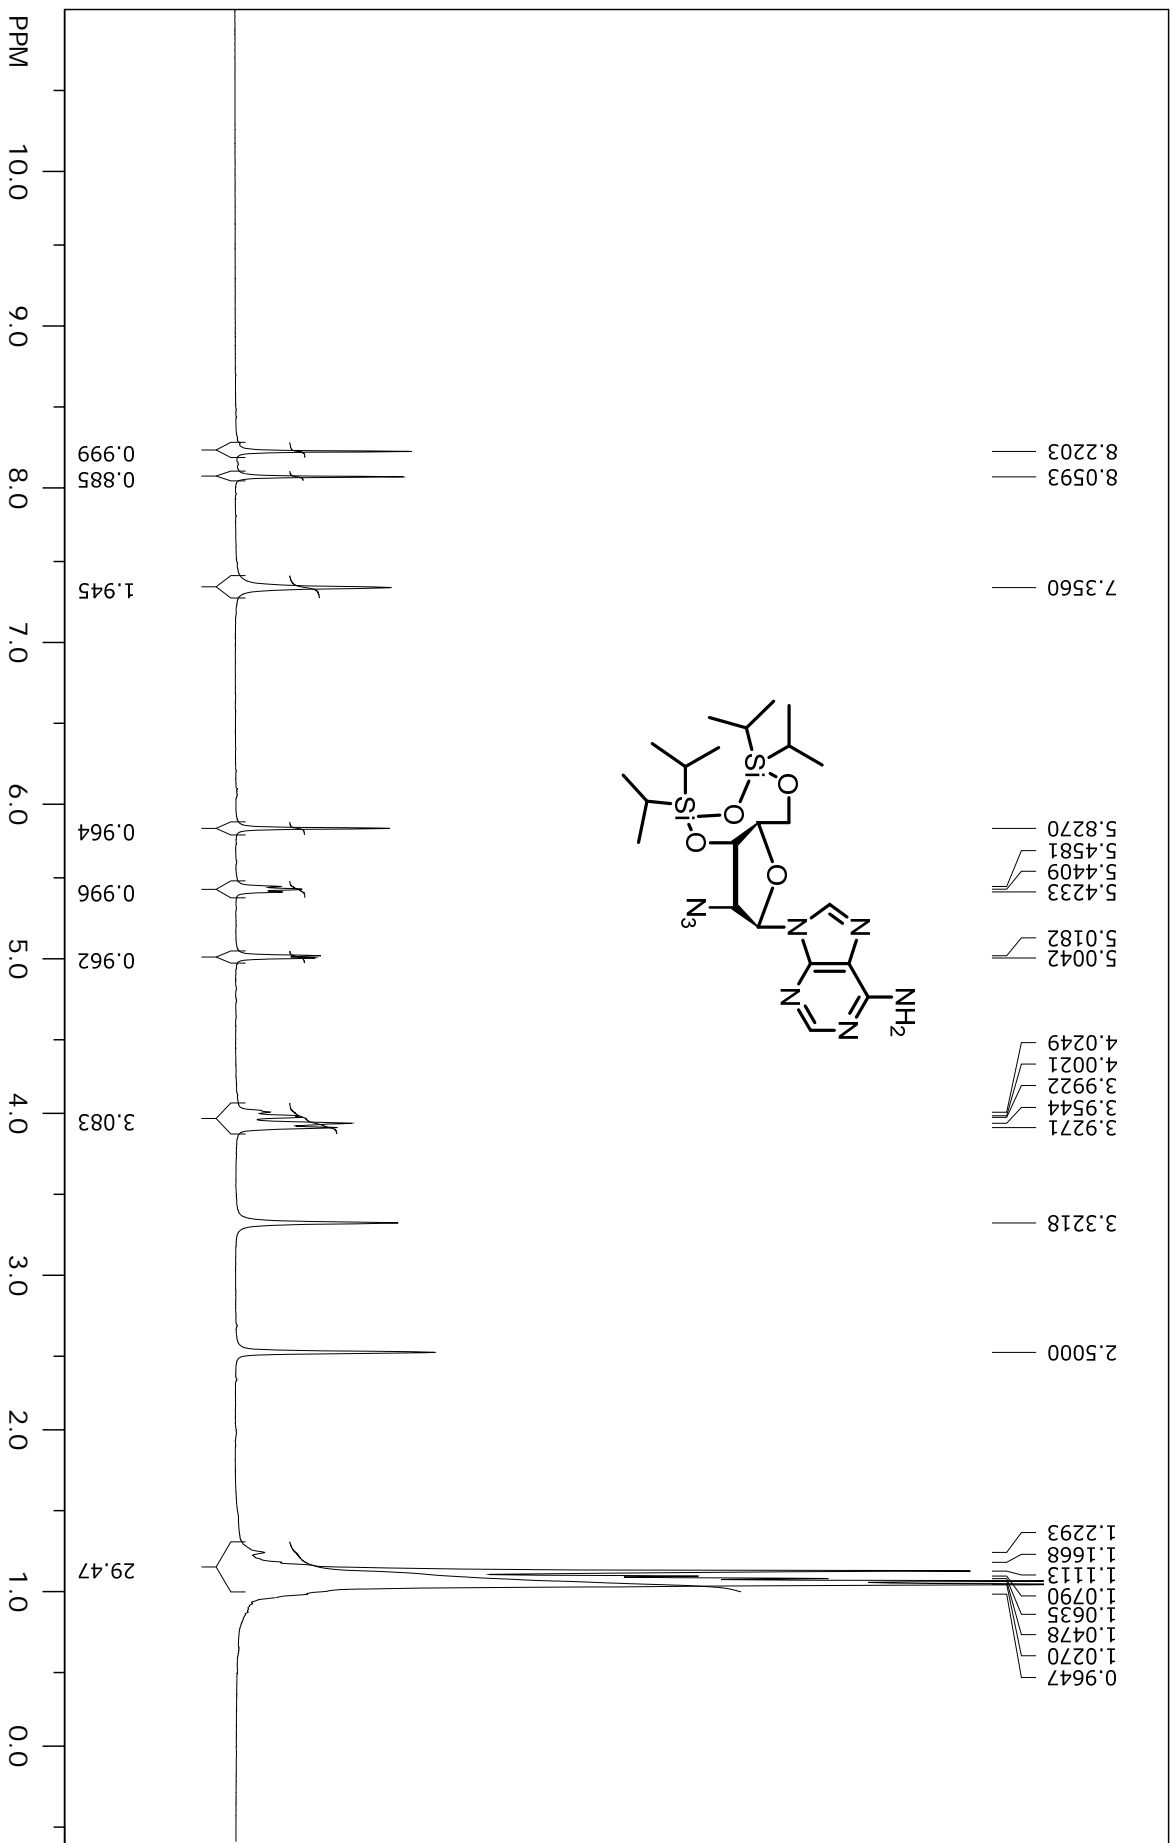

file: ...TON\_ASK-01-057\_20131031\_01.fid\fid block# 1 expt: "s2pu1"  
 transmitter freq.: 399.751031 MHz  
 time domain size: 32768 points  
 width: 6410.26 Hz = 16.0356 ppm = 0.195626 Hz/pt  
 number of scans: 16

freq. of 0 ppm: 399.748619 MHz  
 processed size: 32768 complex points  
 LB: 0.000 GF: 0.0000  
 Hz/cm: 186.031 ppm/cm: 0.46537

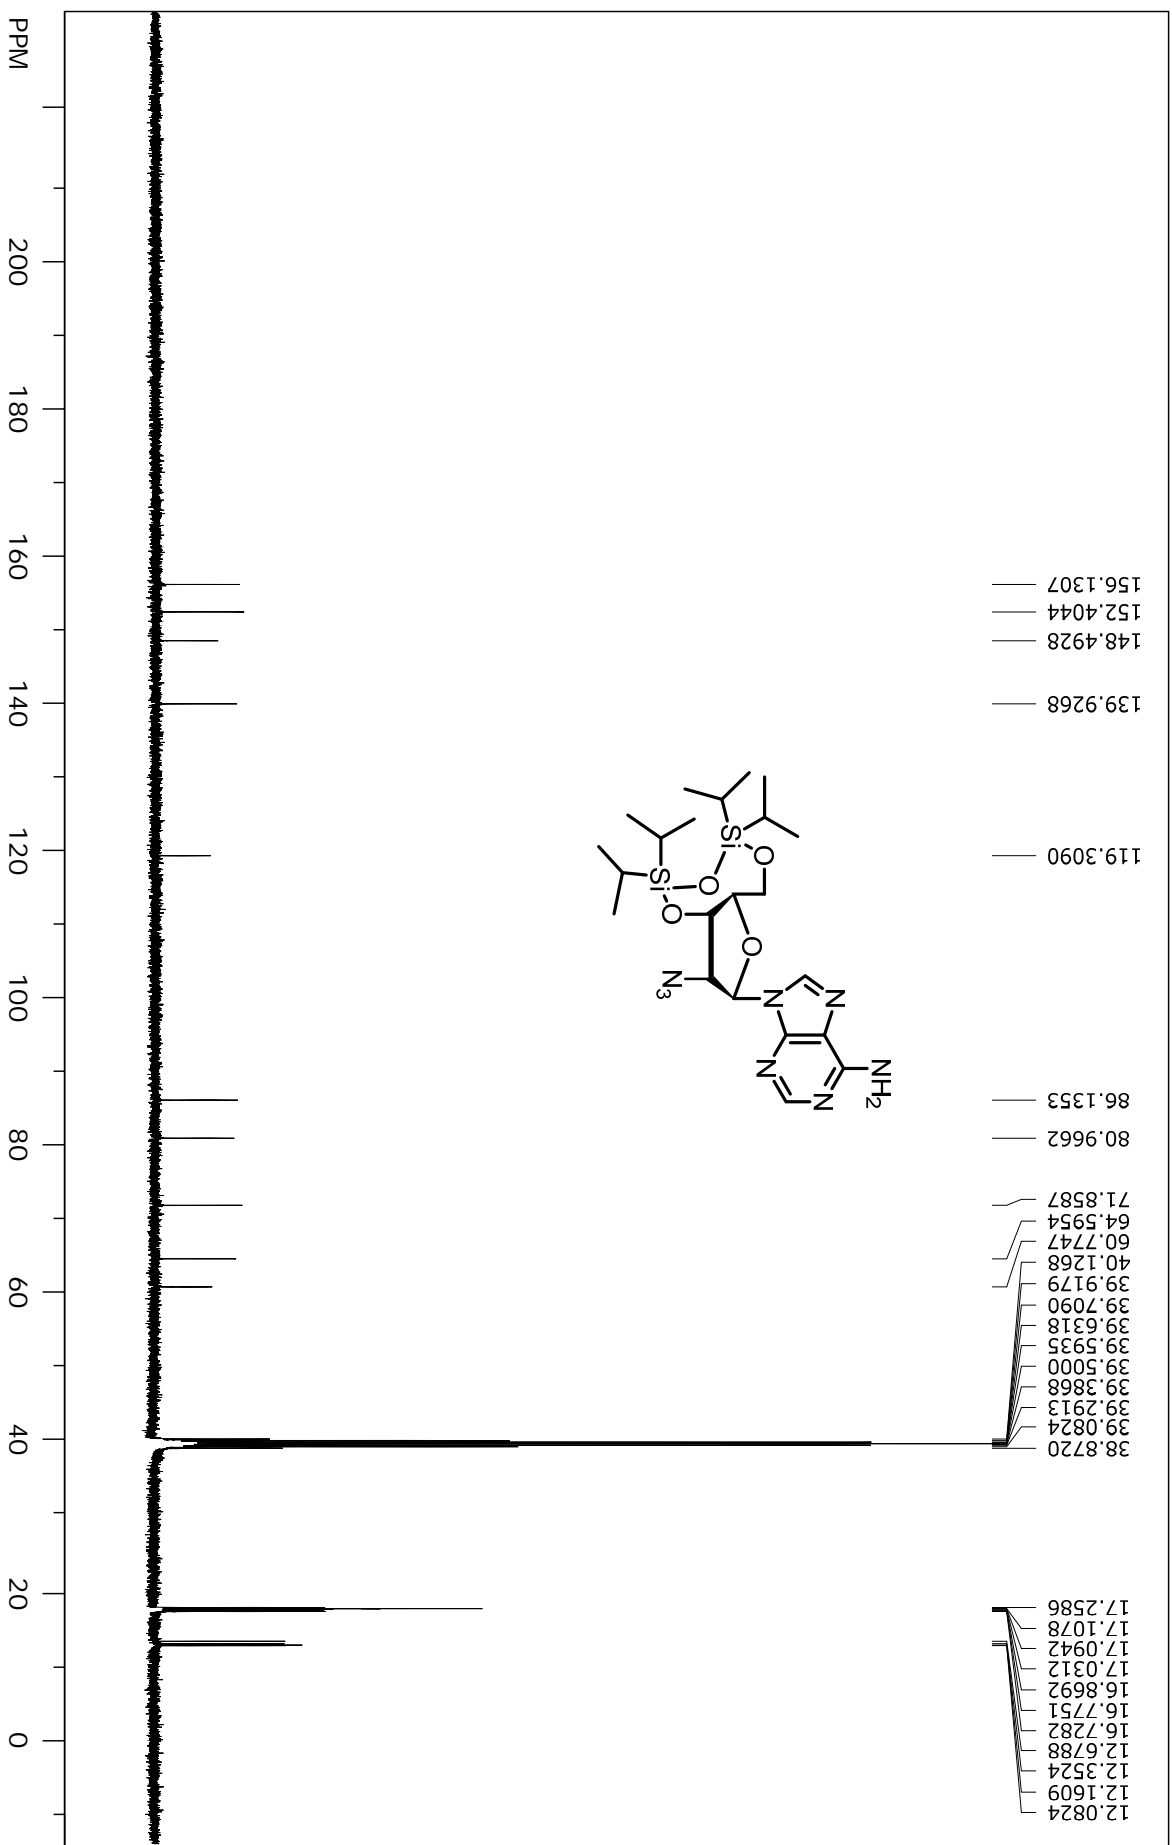

file: ...BON\_ASK-01-057\_20131031\_01.fid\fid\_block# 1 expt: "s2puj"  
 transmitter freq.: 100.527931 MHz  
 time domain size: 65536 points  
 width: 25000.00 Hz = 248.6871 ppm = 0.381470 Hz/pt  
 number of scans: 690

freq. of 0 ppm: 100.516919 MHz  
 processed size: 65536 complex points  
 LB: 0.000 GF: 0.0000  
 Hz/cm: 1000.000 ppm/cm: 9.94748

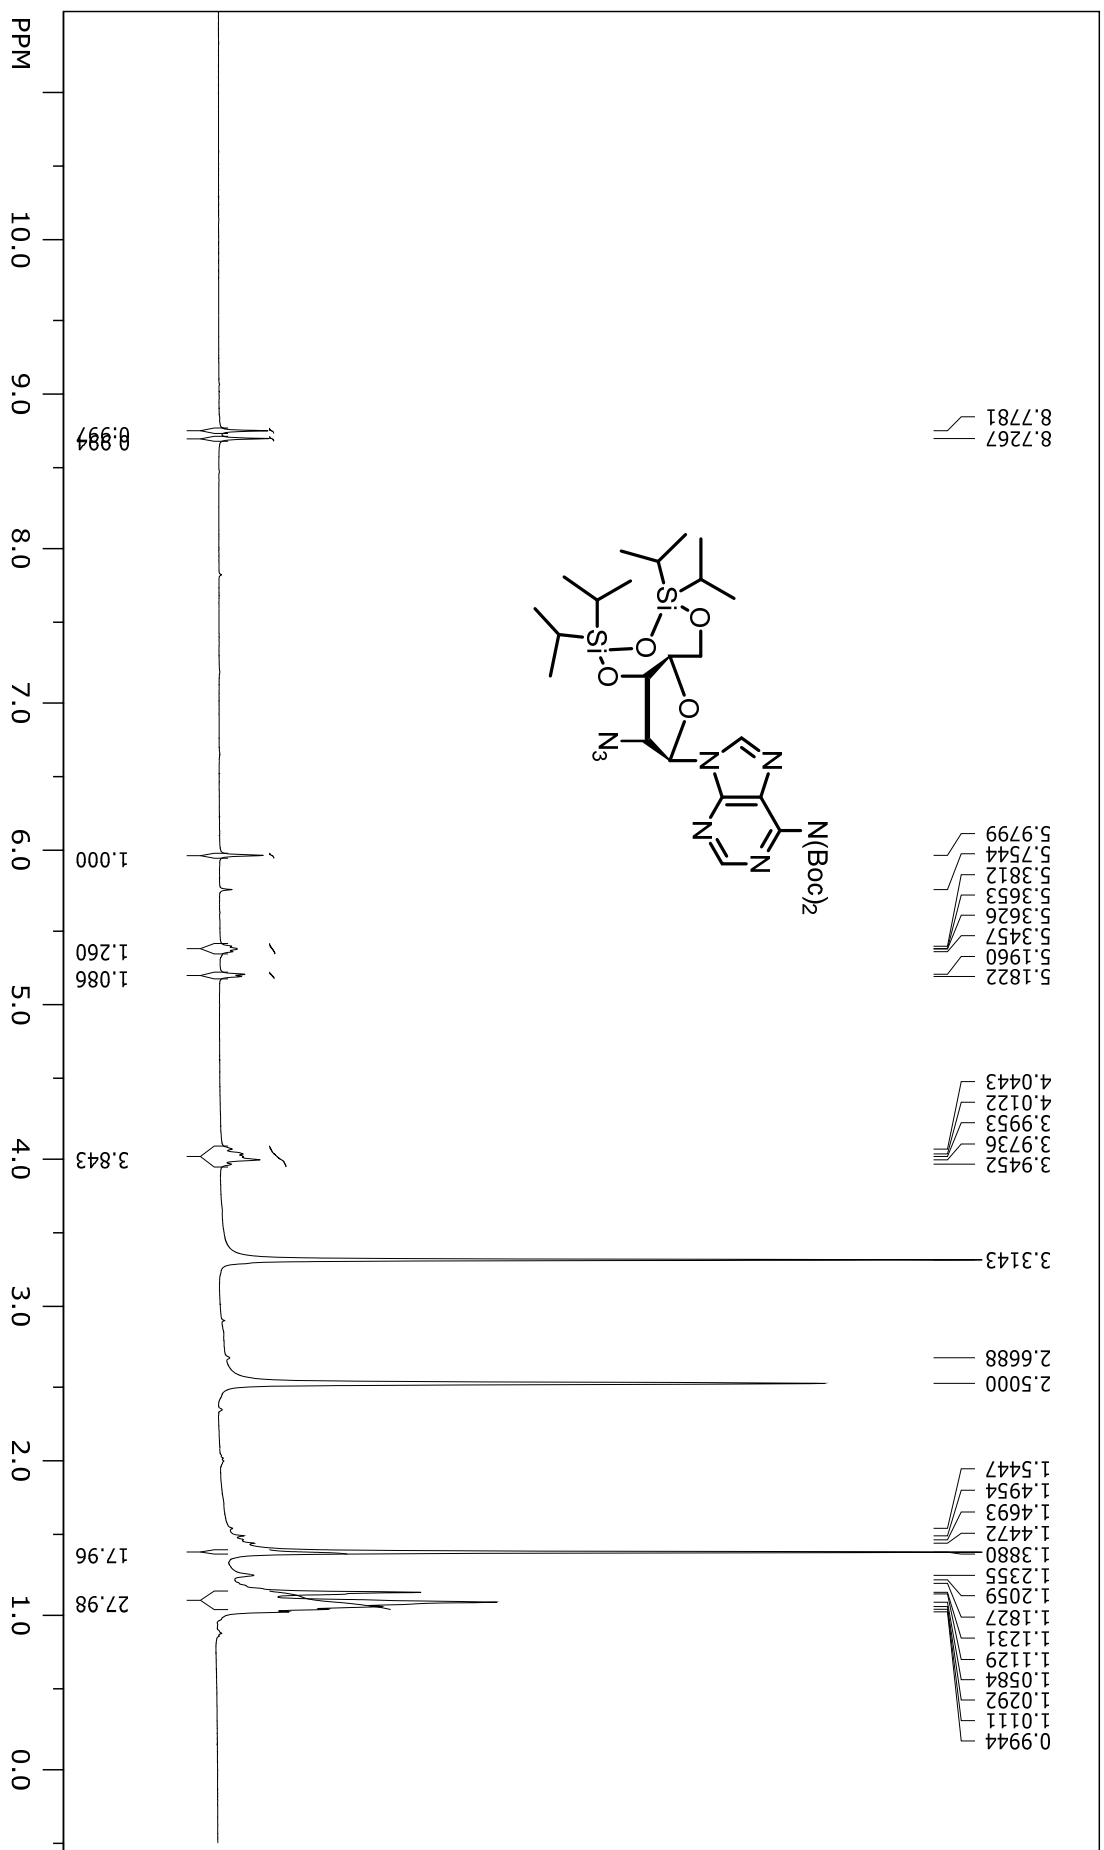

file: ...TON\_ASK-01-059\_20131102\_01.frd\frd block# 1 expt: "s2pu1"  
 transmitter freq.: 399.751031 MHz  
 time domain size: 32768 points  
 width: 6410.26 Hz = 16.0356 ppm = 0.195626 Hz/pt  
 number of scans: 256

freq. of 0 ppm: 399.748620 MHz  
 processed size: 32768 complex points  
 LB: 0.000 GF: 0.0000  
 Hz/cm: 193.028 ppm/cm: 0.48287

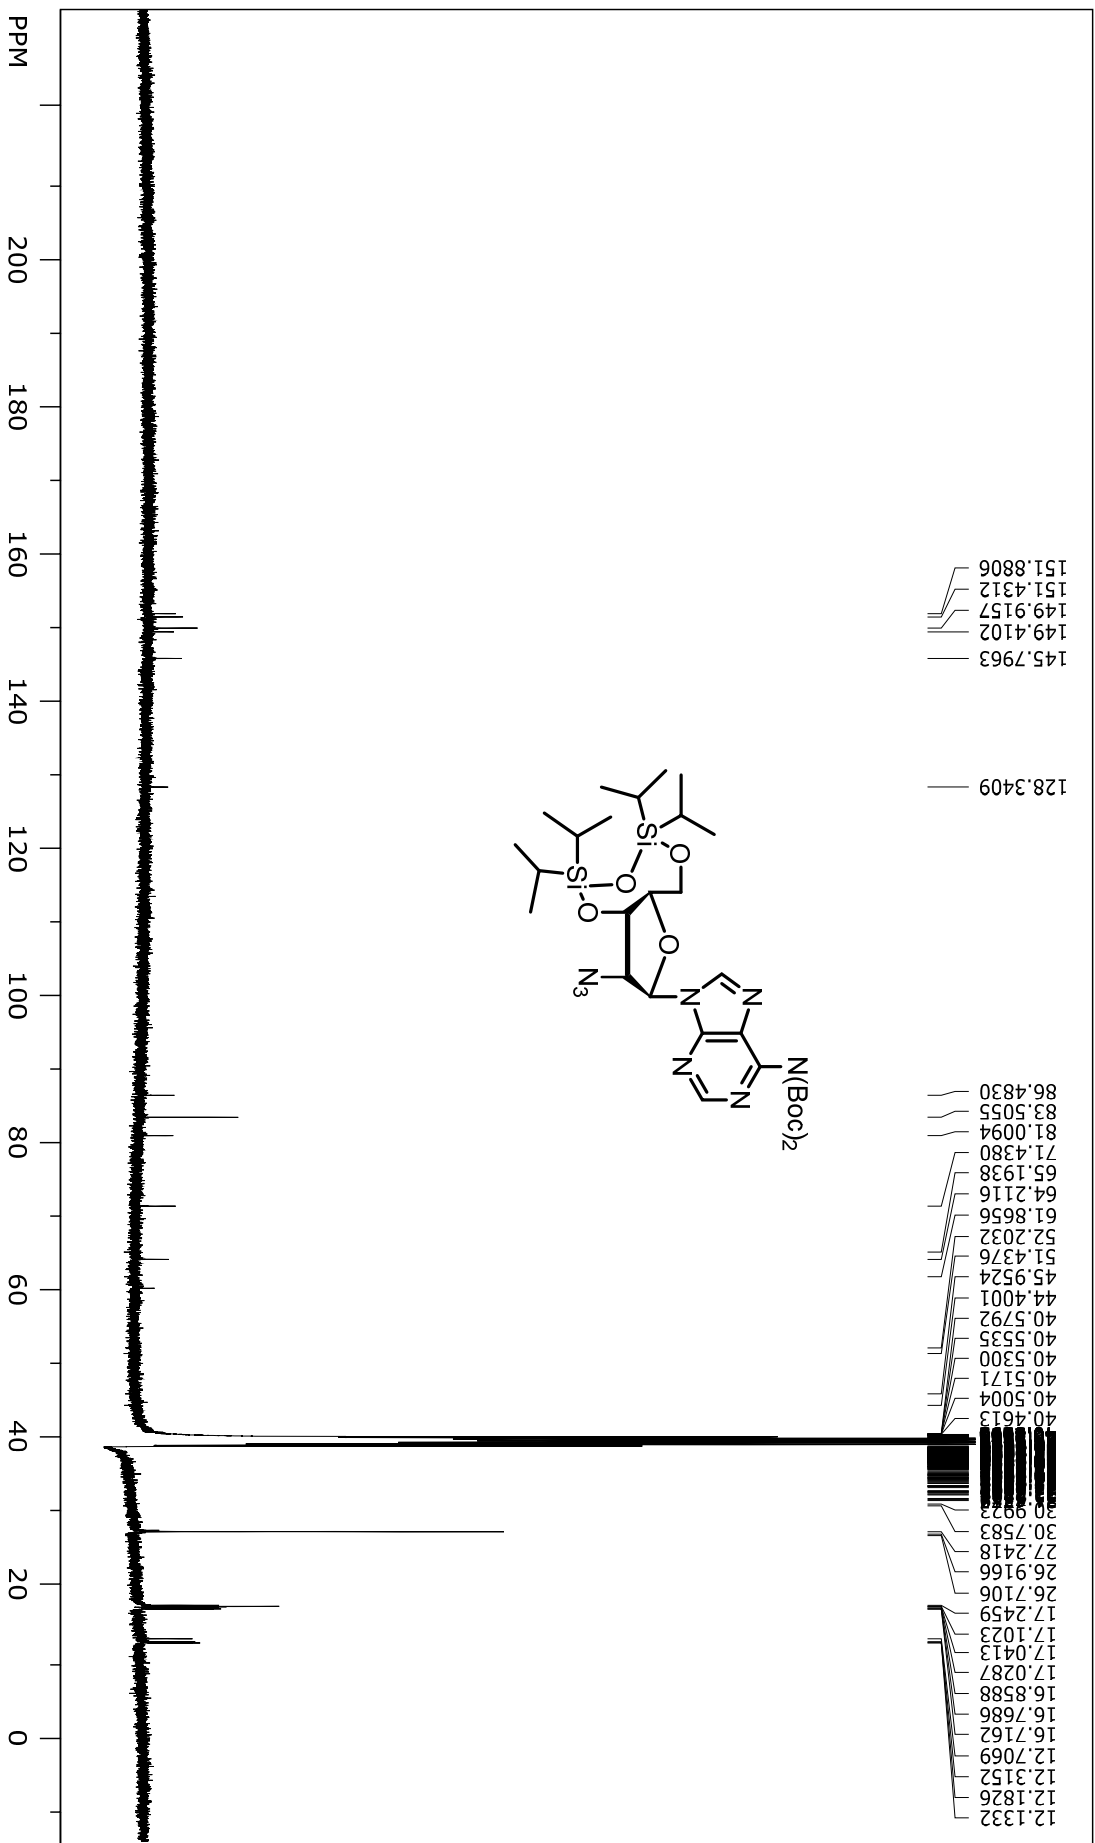

file: ...BON\_ASK-01-059\_20131103\_01.fid\fid\_block# 1 expt: "s2pu1"  
 transmitter freq.: 100.527931 MHz  
 time domain size: 65536 points  
 width: 25000.00 Hz = 248.6871 ppm = 0.381470 Hz/pt  
 number of scans: 20000

freq. of 0 ppm: 100.516919 MHz  
 processed size: 65536 complex points  
 LB: 0.000 GF: 0.0000  
 Hz/cm: 1000.000 ppm/cm: 9.94748

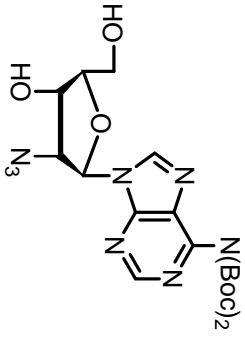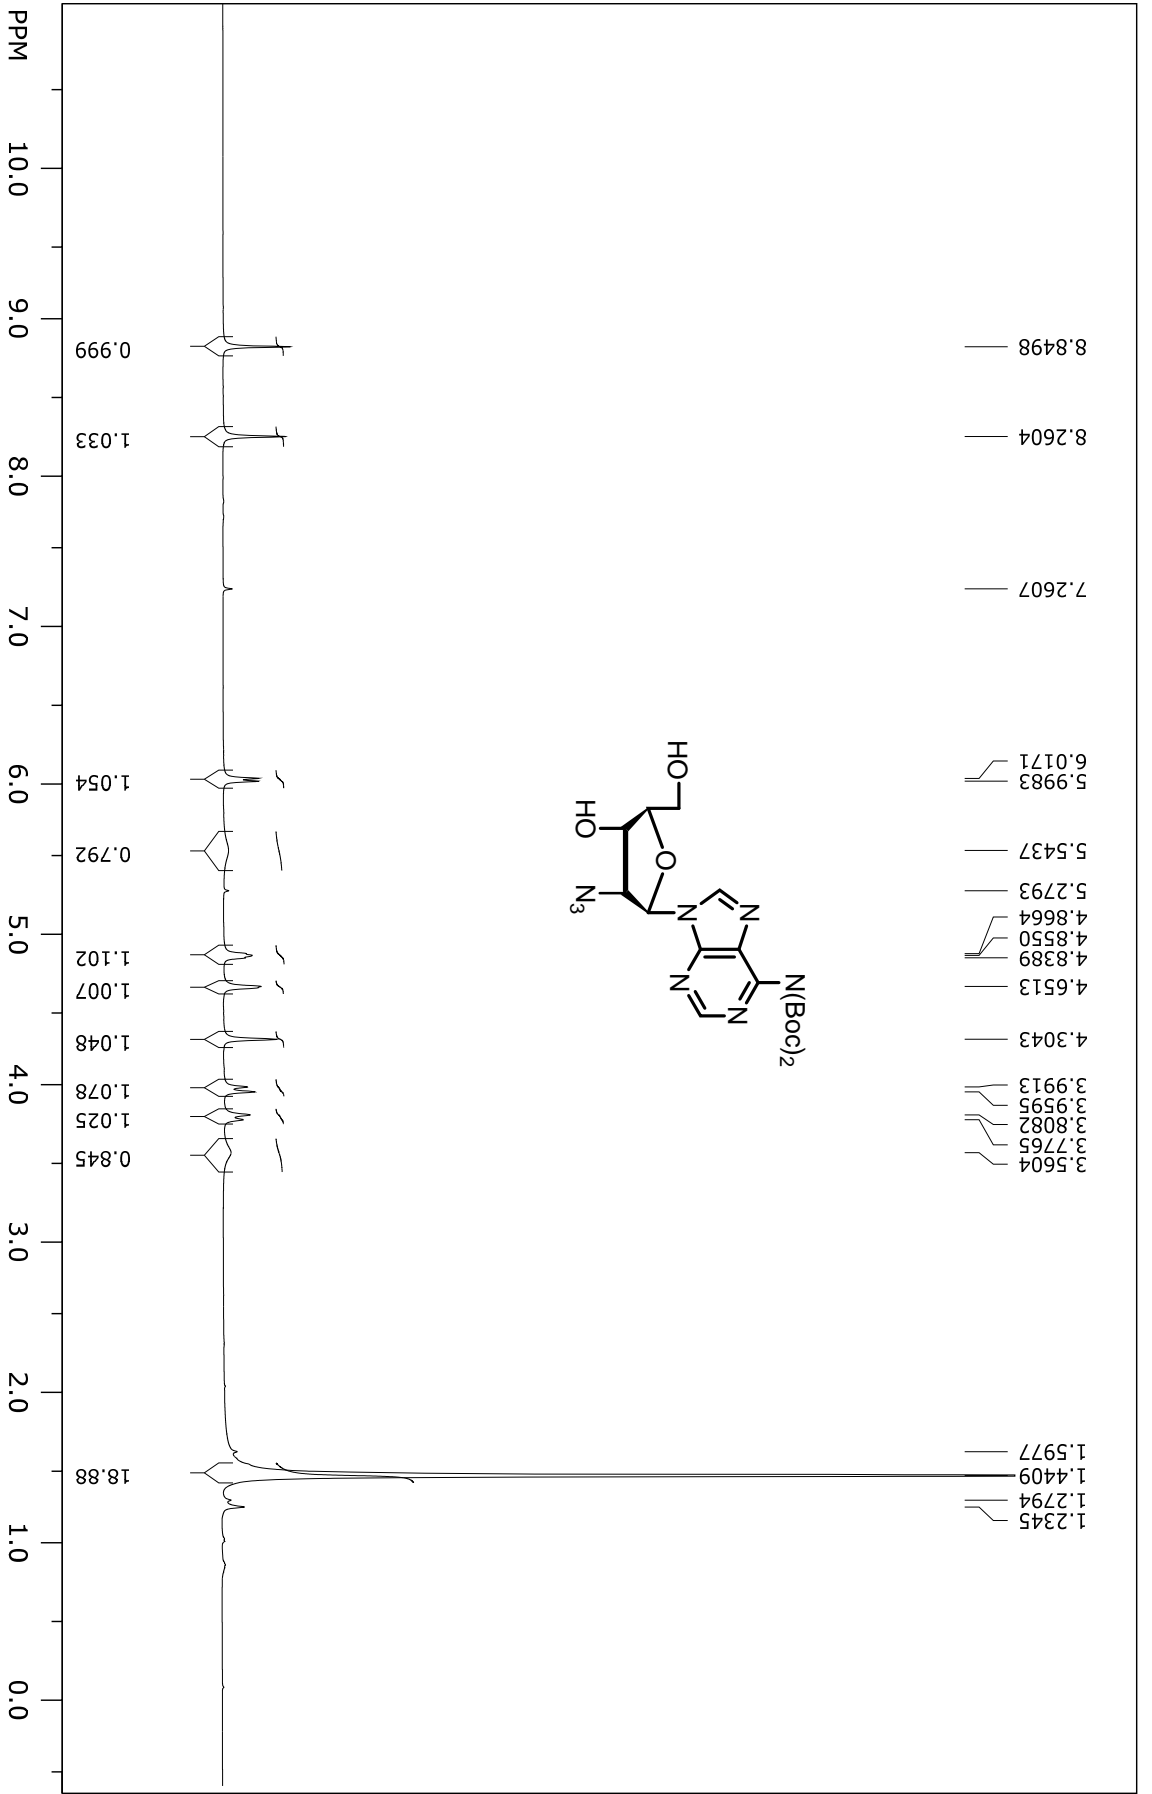

file: ...ON-MEDCHEM-400\_20131106\_01.fid\fid block# 1 expt: "s2pu1"  
 transmitter freq.: 399.749132 MHz  
 time domain size: 32768 points  
 width: 6410.26 Hz = 16.0357 ppm = 0.195626 Hz/pt  
 number of scans: 490

freq. of 0 ppm: 399.746727 MHz  
 processed size: 32768 complex points  
 LB: 0.000 GF: 0.0000  
 Hz/cm: 187.060 ppm/cm: 0.46794



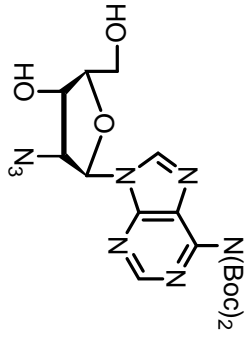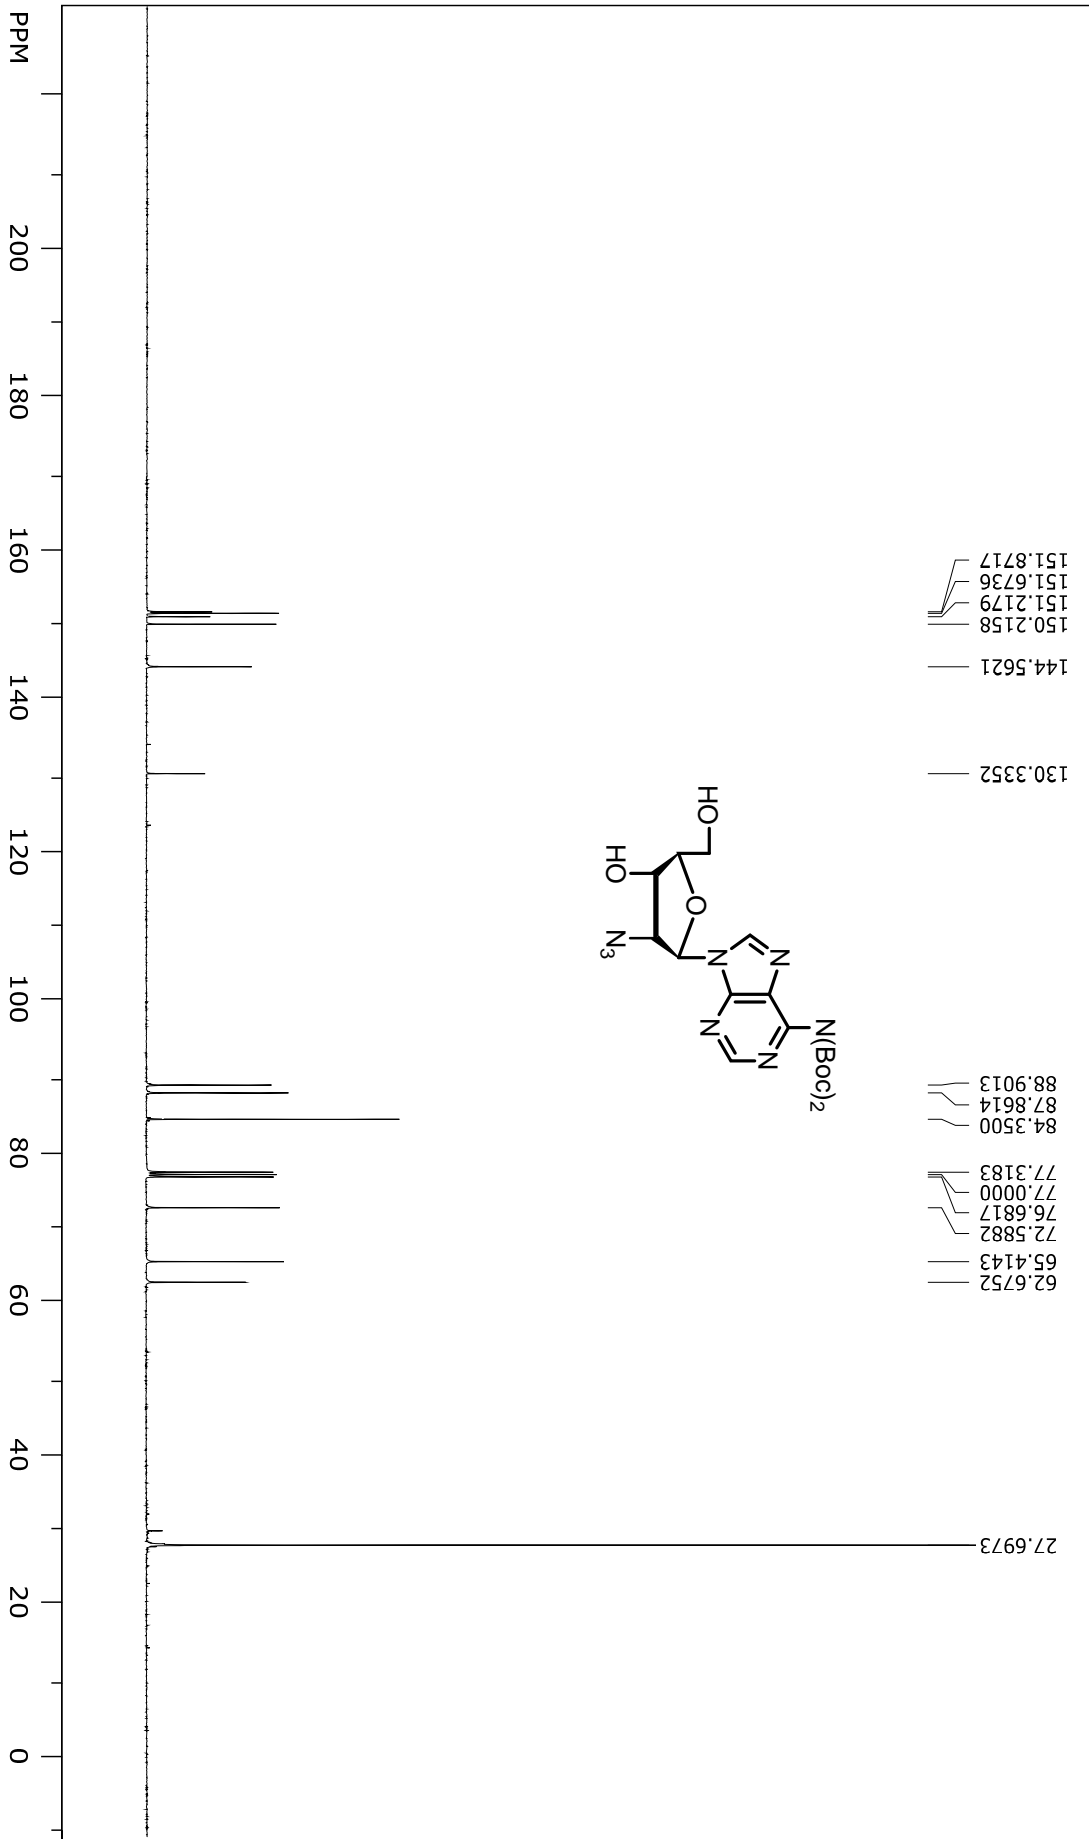

file: ...ON-MEDCHEM-400\_20131107\_01.fid\fid block# 1 expt: "szpul"  
 transmitter freq.: 100.527453 MHz  
 time domain size: 65536 points  
 width: 25000.00 Hz = 248.6883 ppm = 0.381470 Hz/pt  
 number of scans: 15000

freq. of 0 ppm: 100.516398 MHz  
 processed size: 65536 complex points  
 LB: 0.000 GF: 0.0000  
 Hz/cm: 979.936 ppm/cm: 9.74794

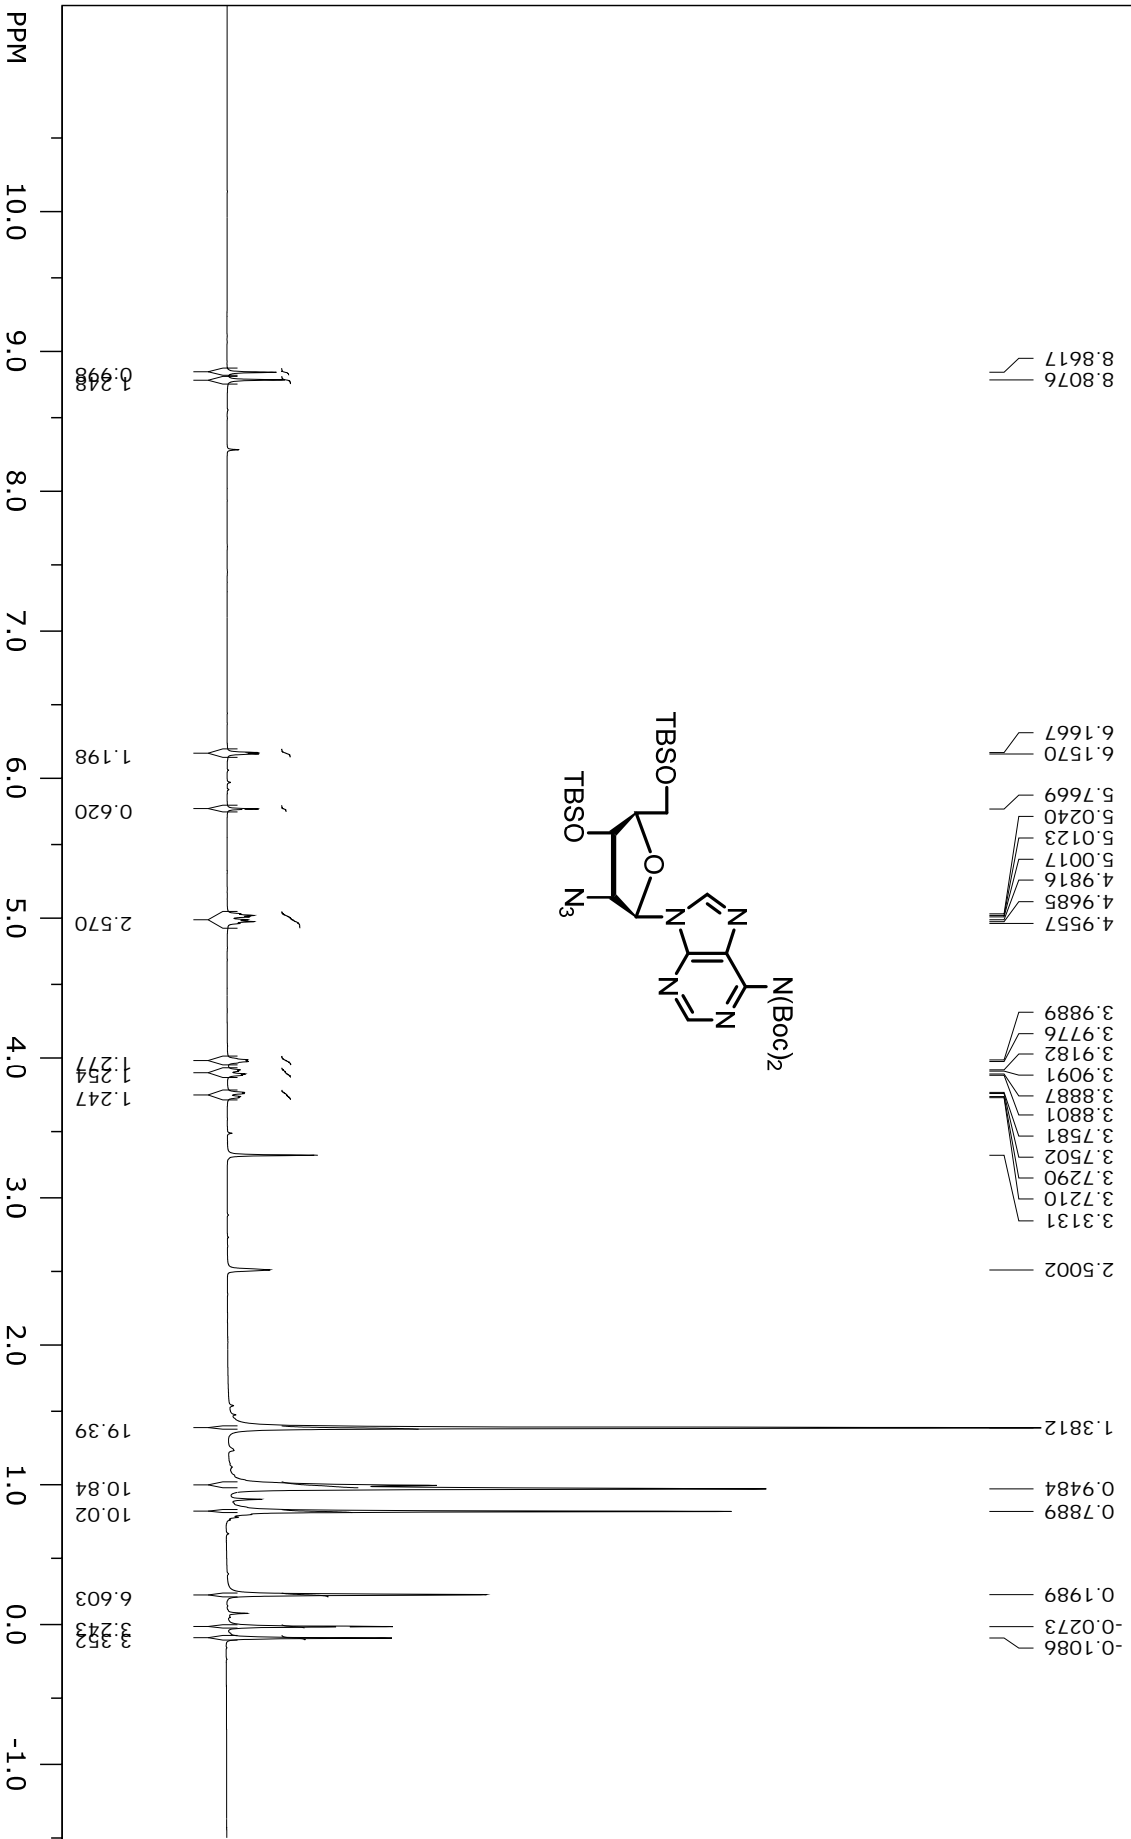

file: ...-01-077-PROTON\_20140109\_01.fid\fid block# 1 expt: "s2pul"  
 transmitter freq.: 399.744517 MHz  
 time domain size: 32768 points  
 width: 6410.26 Hz = 16.0359 ppm = 0.195626 Hz/pt  
 number of scans: 128

freq. of 0 ppm: 399.742112 MHz  
 processed size: 32768 complex points  
 LB: 0.000 GF: 0.0000  
 Hz/cm: 207.639 ppm/cm: 0.51943

file: ...-01-077-CARBON\_20140110\_01.fid\fid block# 1 exp: "szpul"  
 transmitter freq.: 100.526292 MHz  
 time domain size: 65536 points  
 width: 25000.00 Hz = 248.6912 ppm = 0.381470 Hz/pt  
 number of scans: 15000

freq. of 0 ppm: 100.515283 MHz  
 processed size: 65536 complex points  
 LB: 0.000 GF: 0.0000  
 Hz/cm: 1000.000 ppm/cm: 9.94765

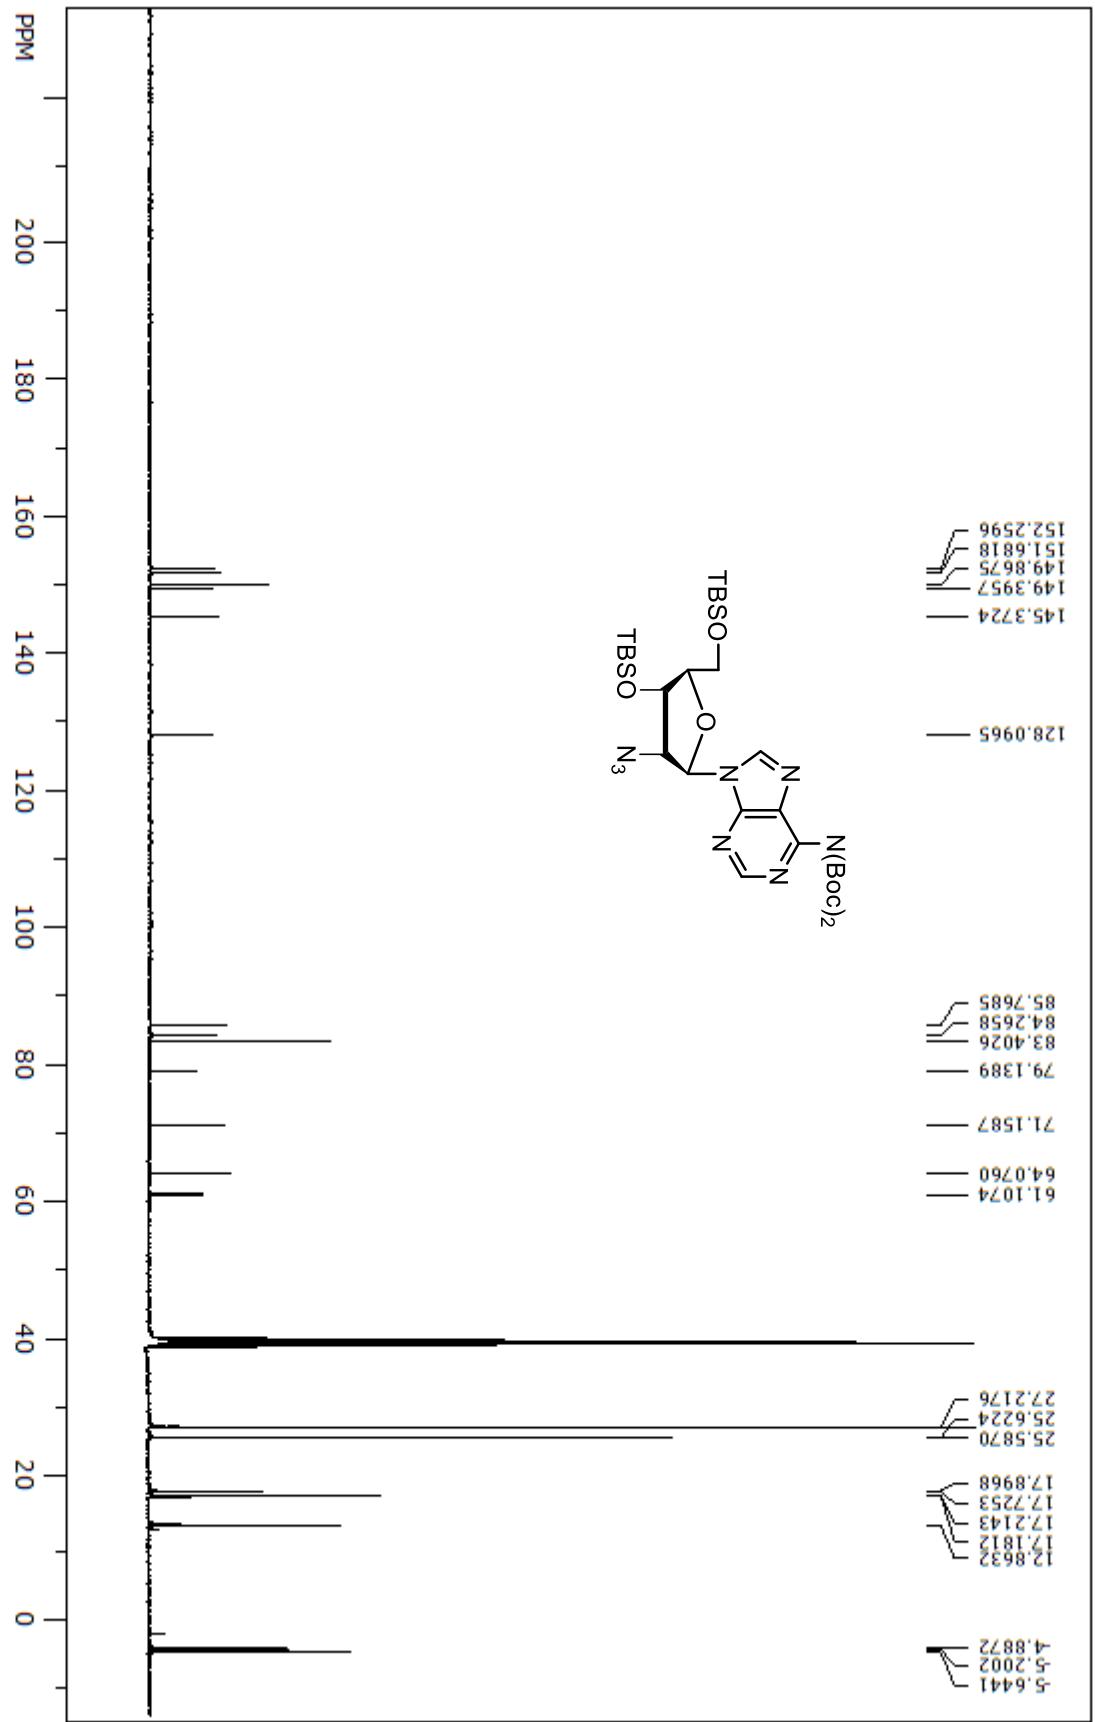

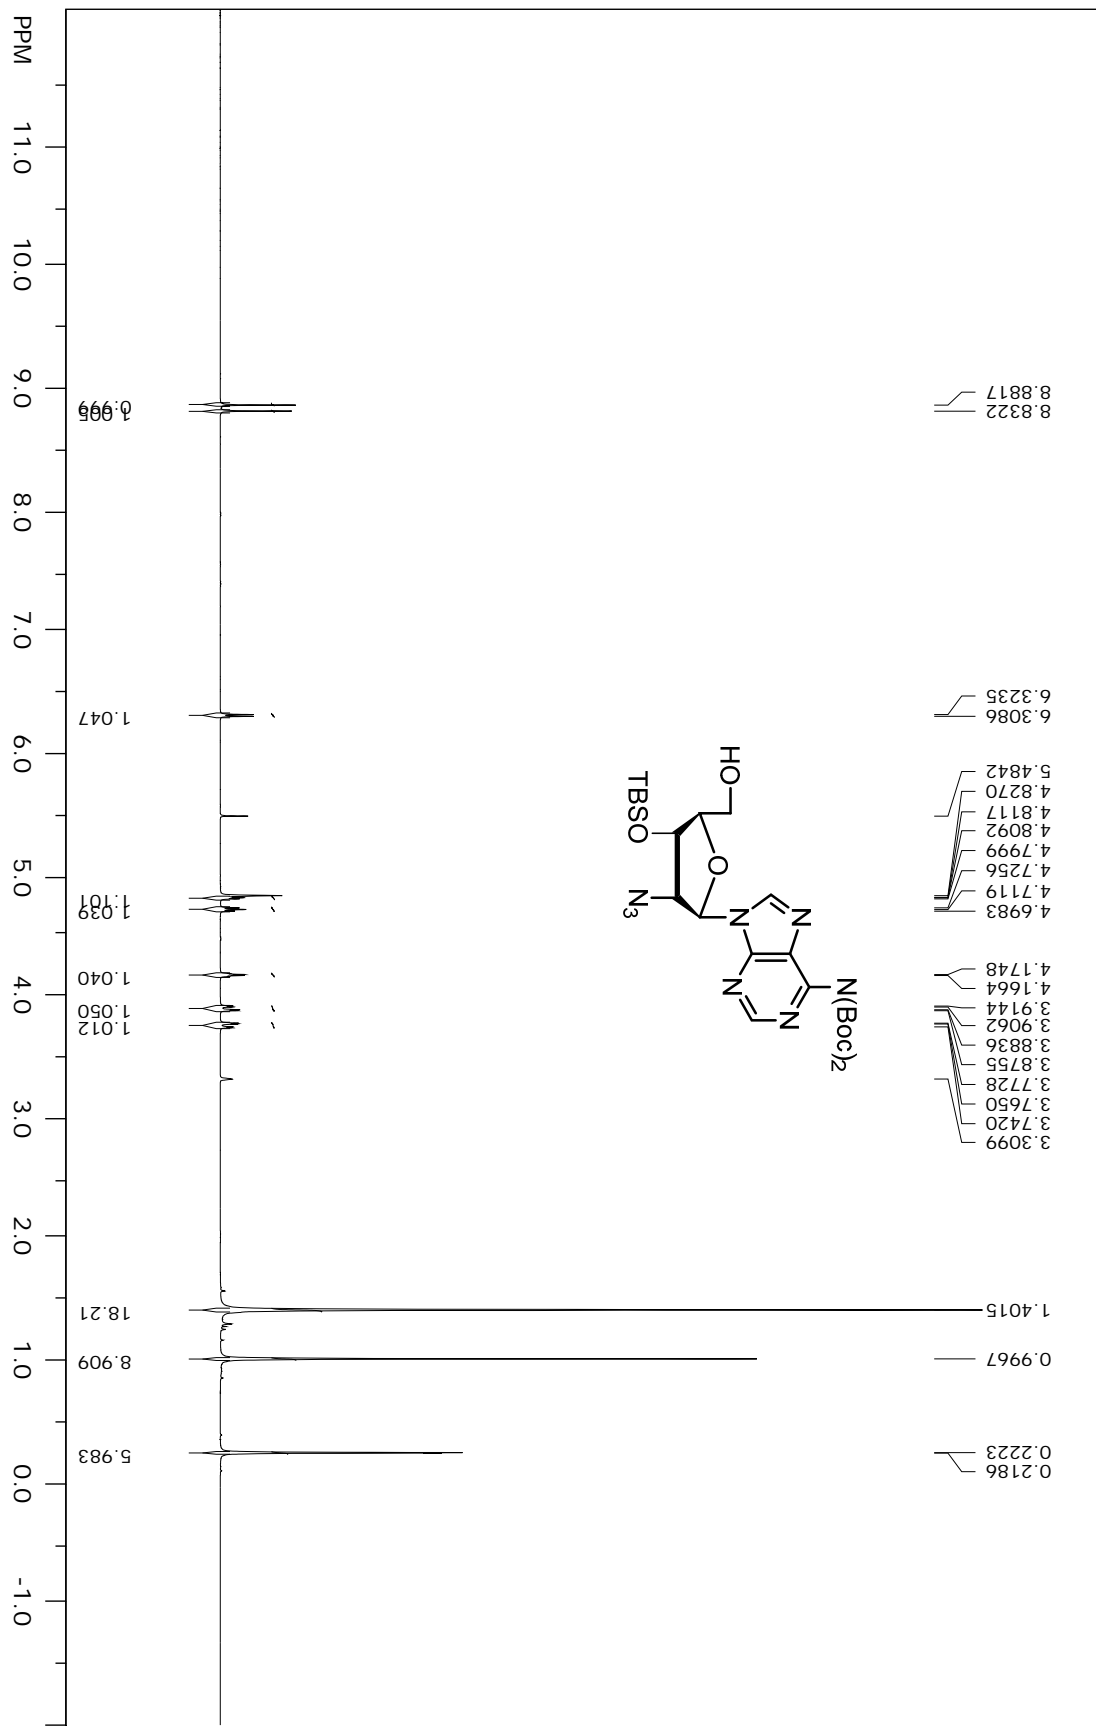

file: ...ers\Alvin\Desktop\ASK-03-2771\ftd exp1: <zg30>  
 transmitter freq.: 400.132471 MHz  
 time domain size: 65536 points  
 width: 8223.68 Hz = 20.5524 ppm = 0.125483 Hz/pt  
 number of scans: 16

freq. of 0 ppm: 400.130003 MHz  
 processed size: 32768 complex points  
 LB: 0.000 GF: 0.0000  
 Hz/cm: 227.042 ppm/cm: 0.56742

file: ..\ers\Alvin\Desktop\ASK-03-277\2\fid expt: <zpg930>  
 transmitter freq.: 100.622830 MHz  
 time domain size: 65536 points  
 width: 24038.46 Hz = 238.8967 ppm = 0.366798 Hz/pt  
 number of scans: 5000

freq. of 0 ppm: 100.612618 MHz  
 processed size: 32768 complex points  
 LB: 0.000 GF: 0.0000  
 Hz/cm: 961.538 ppm/cm: 9.55587

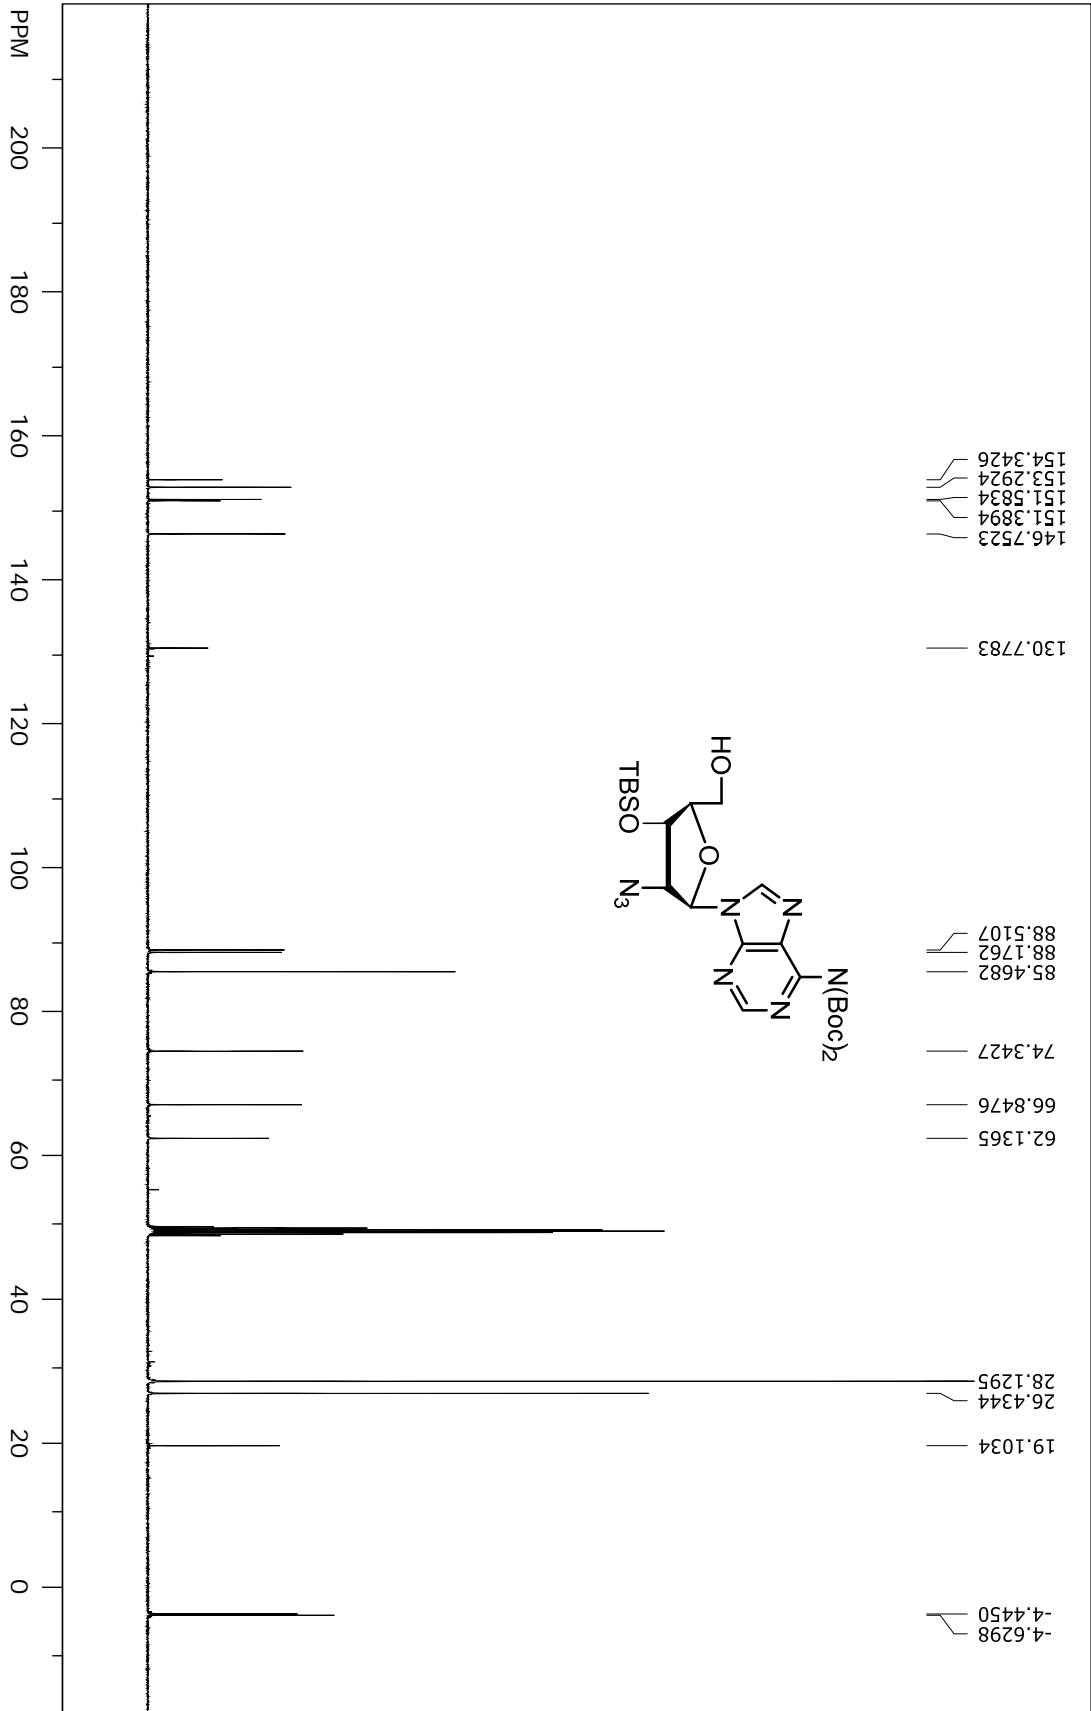

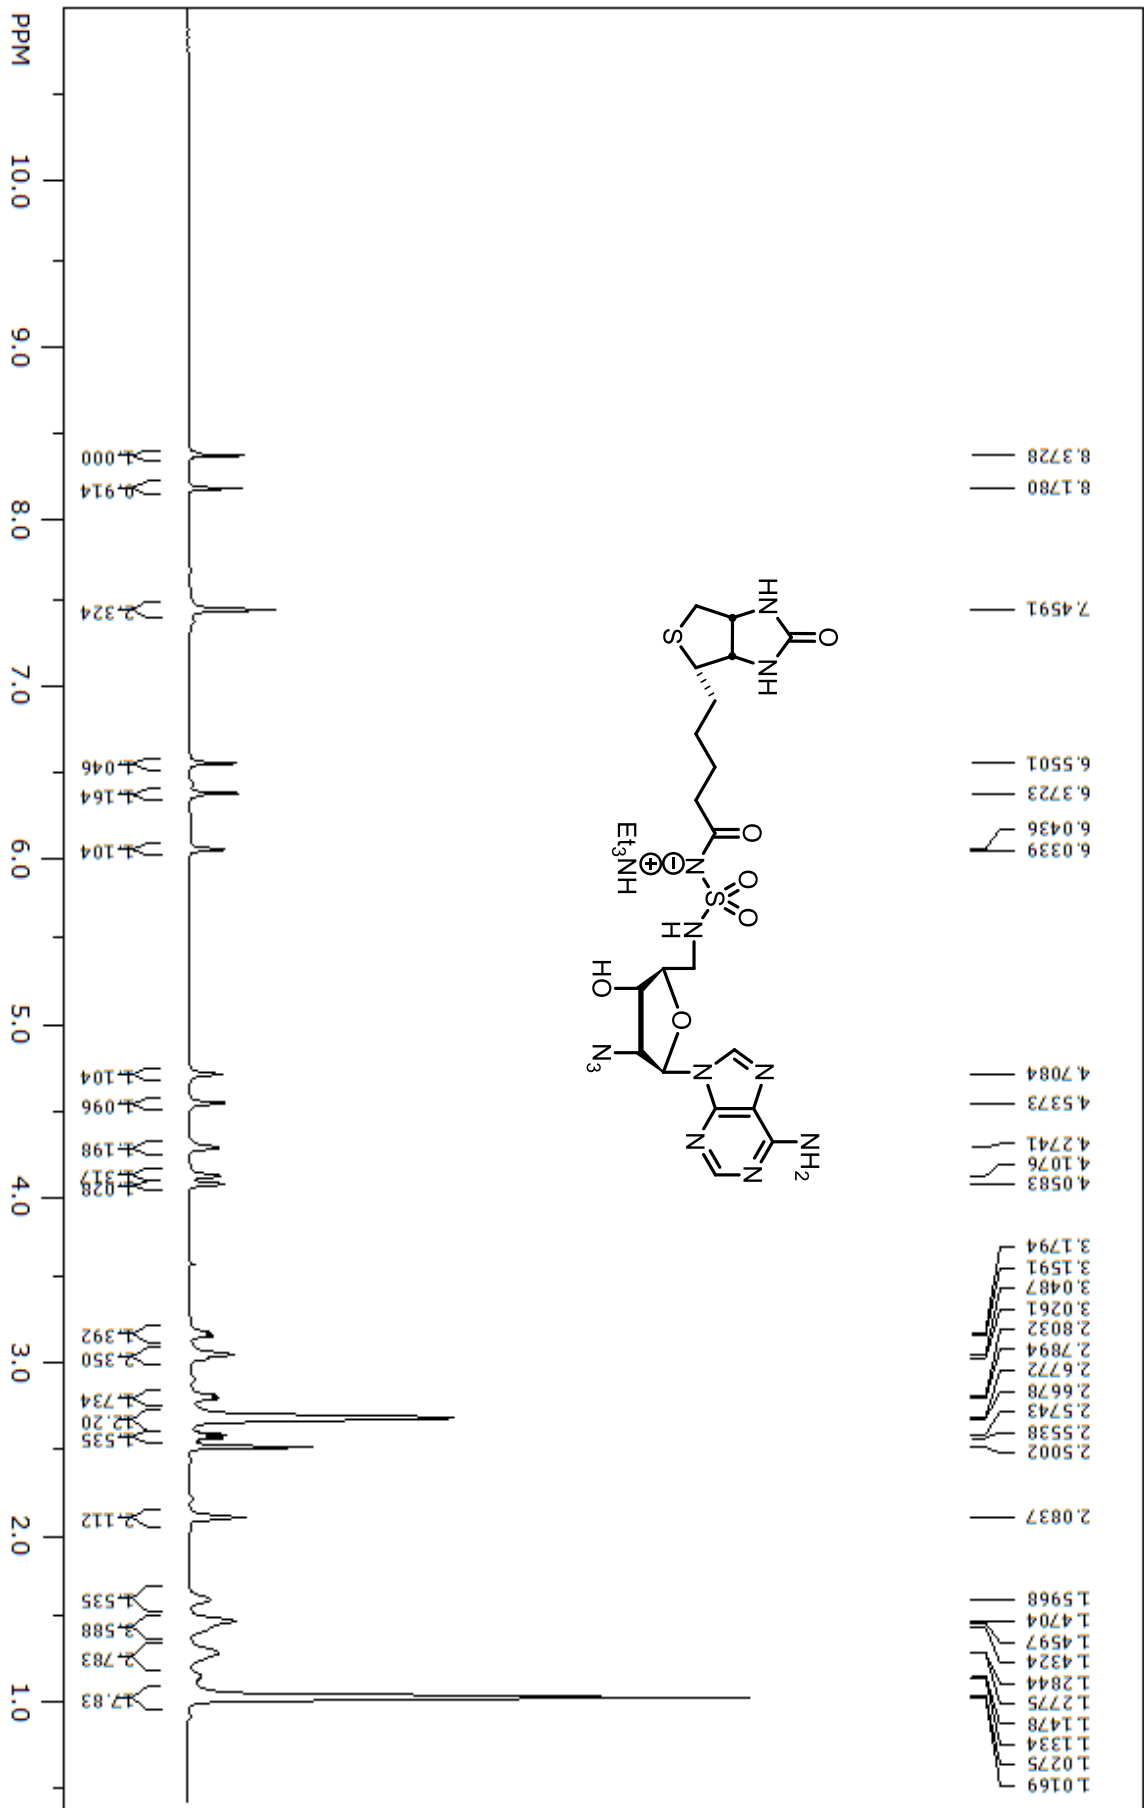

file: ...SK-02-163-PROTON\_PROTON\_01.fid\fid block# 1 expt: "szpul"  
 transmitter freq.: 599.672148 MHz  
 time domain size: 32768 points  
 width: 9615.38 Hz = 16.0344 ppm = 0.293438 Hz/pt  
 number of scans: 64

freq. of 0 ppm: 599.667125 MHz  
 processed size: 32768 complex points  
 LB: 0.000 GF: 0.0000  
 Hz/cm: 254.915 ppm/cm: 0.42509

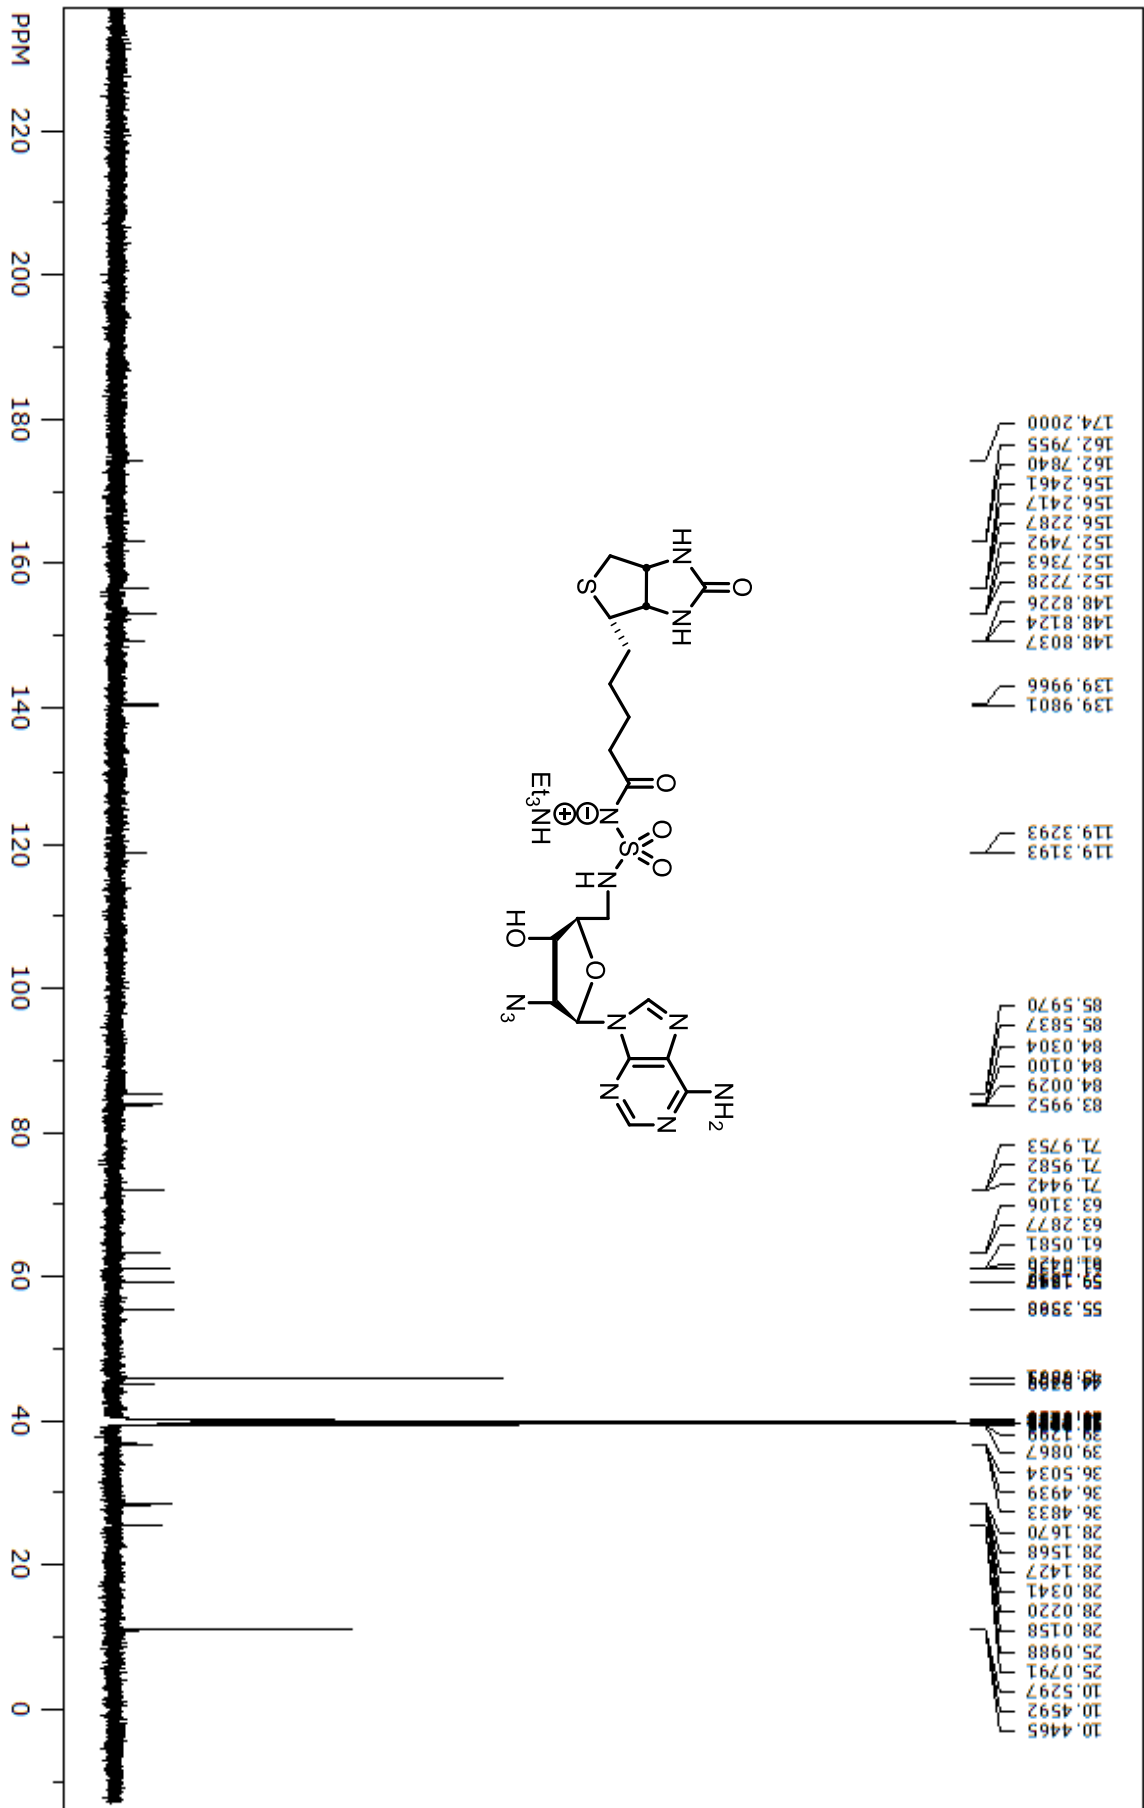

file: ...SK-02-163-CARBON\_CARBON\_01.fid\fid block# 1 expt: "s2pul"  
 transmitter freq.: 150.803363 MHz  
 time domain size: 65536 points  
 width: 37878.79 Hz = 251.1800 ppm = 0.577984 Hz/pt  
 number of scans: 2888

freq. of 0 ppm: 150.786491 MHz  
 processed size: 65536 complex points  
 LB: 0.000 GF: 0.0000  
 Hz/cm: 1515.152 ppm/cm: 10.04720

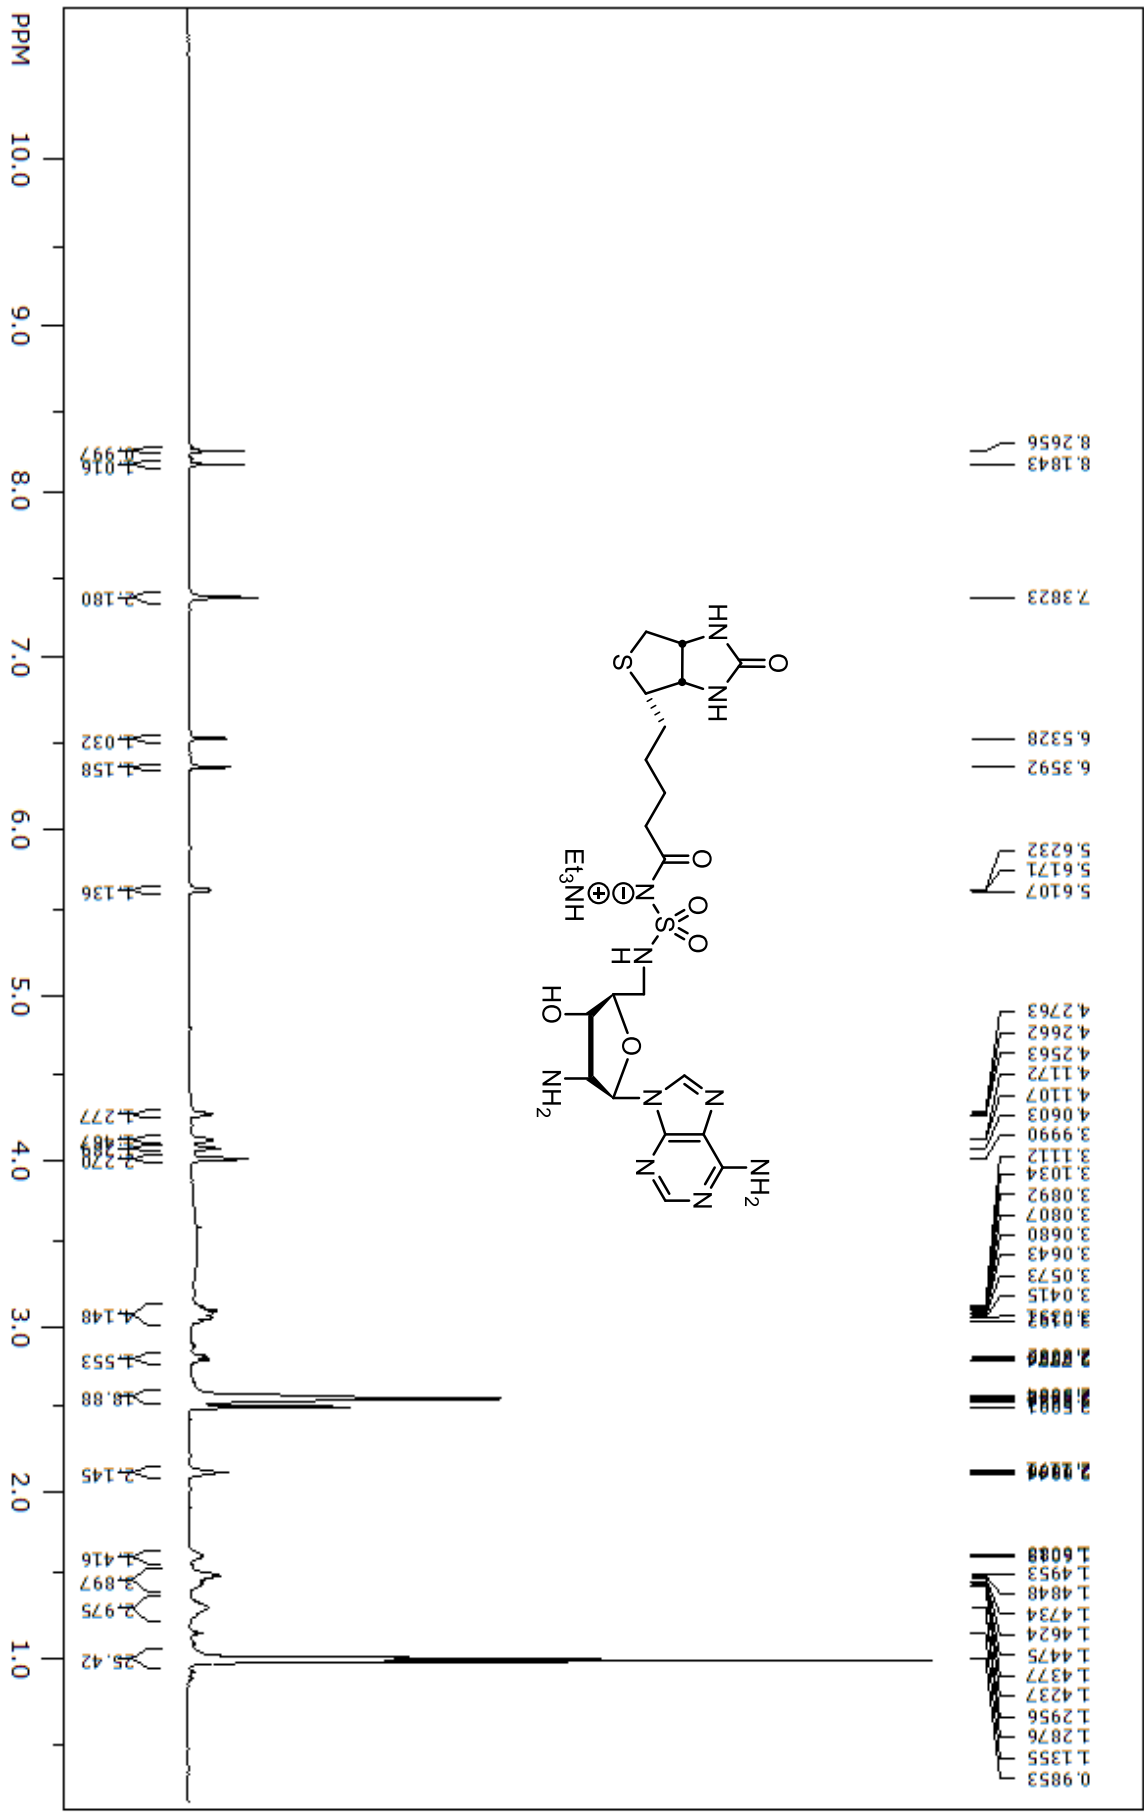

file: ...SK-03-003-PROTON\_PROTON\_01.fid\fid\_block# 1 expt: "szpu1"  
 transmitter freq.: 599.672148 MHz  
 time domain size: 32768 points  
 width: 9615.38 Hz = 16.0344 ppm = 0.293438 Hz/pt  
 number of scans: 128

freq. of 0 ppm: 599.668532 MHz  
 processed size: 32768 complex points  
 LB: 0.000 GF: 0.0000  
 Hz/cm: 259.615 ppm/cm: 0.43293



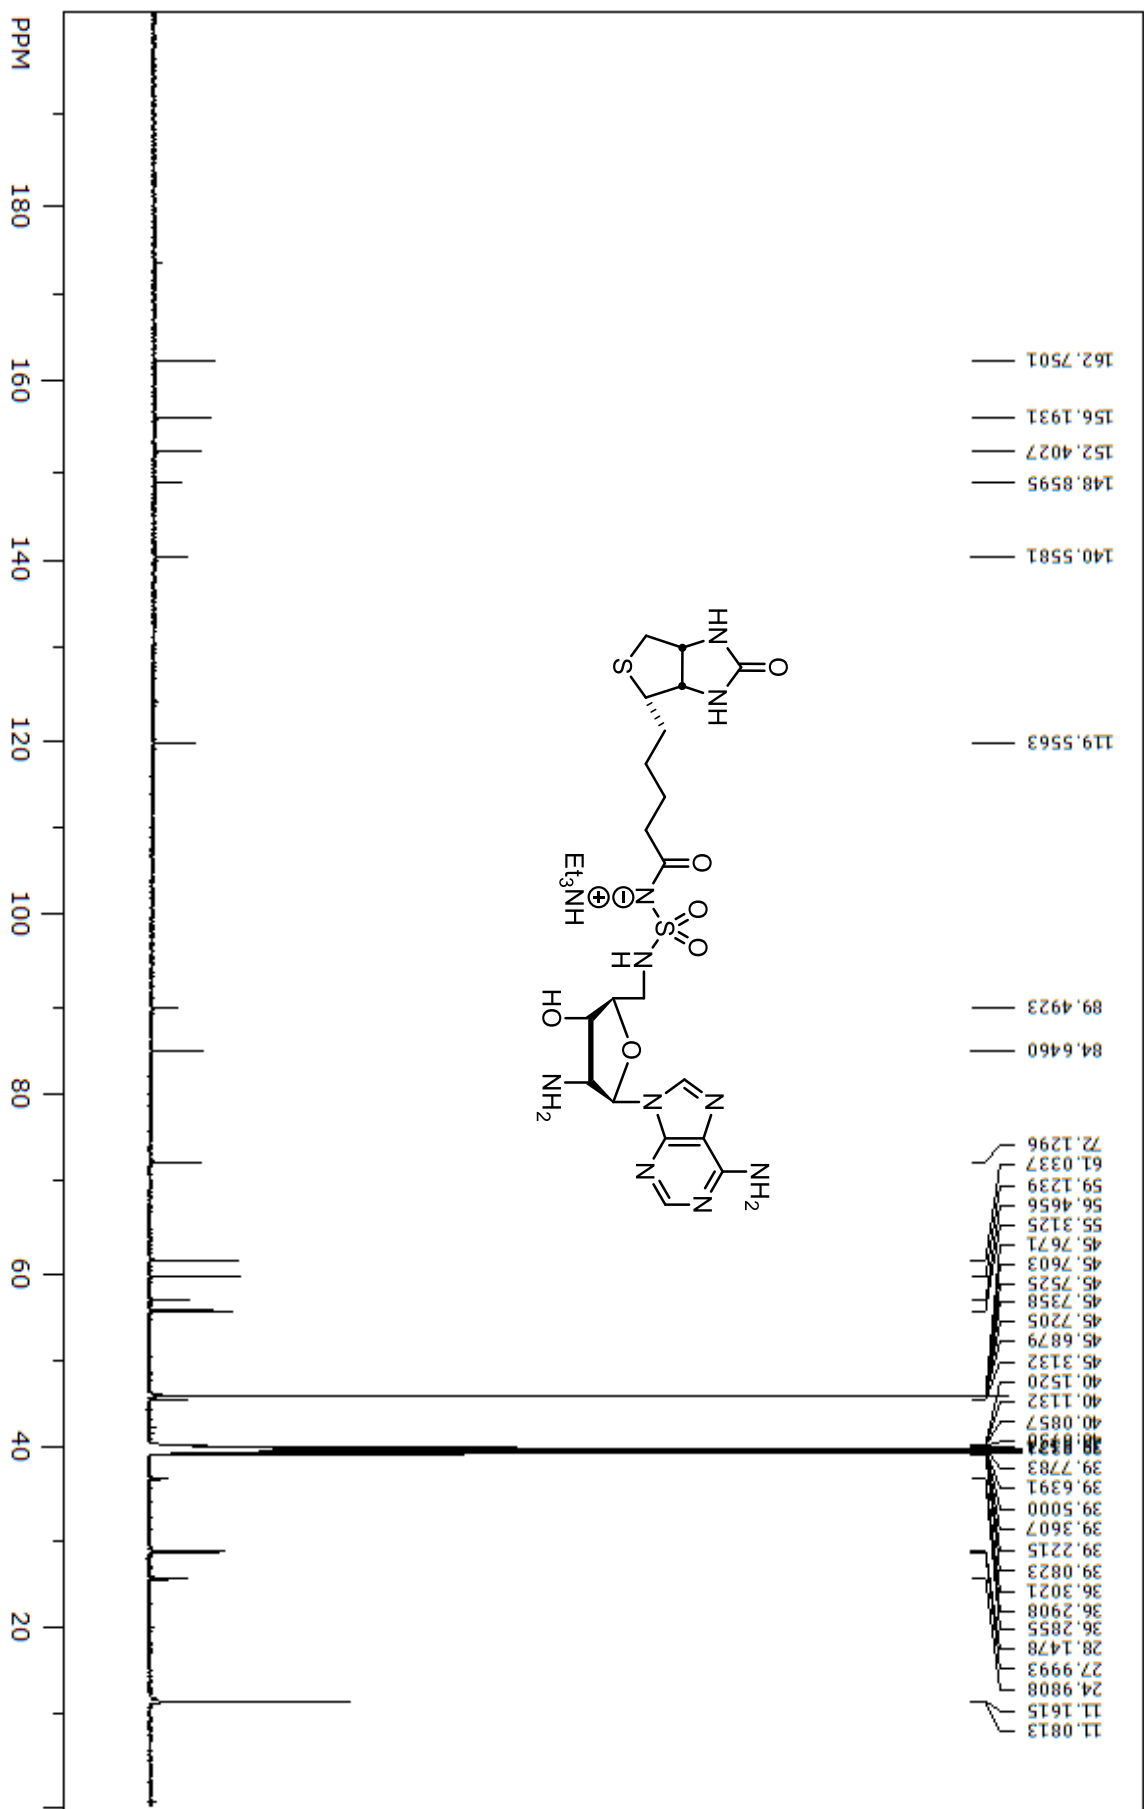

file: ...SK-03-003-CARBON\_CARBON\_01.fid\fid block# 1 expt: "s2pul"  
 transmitter freq.: 150.803363 MHz  
 time domain size: 65536 points  
 width: 37878.79 Hz = 251.1800 ppm = 0.577984 Hz/pt  
 number of scans: 23000

freq. of 0 ppm: 150.786846 MHz  
 processed size: 65536 complex points  
 LB: 0.000 GF: 0.0000  
 Hz/cm: 1223.309 ppm/cm: 8.11194

file: ...-01-245-PROTON\_20131014\_01.fid\fid\_block# 1 exp#: "szpu1"  
 Transmitter Freq.: 399.749132 MHz  
 time domain size: 32768 points  
 width: 6410.26 Hz = 16.0357 ppm = 0.195626 Hz/pt  
 number of scans: 32

freq. of 0 ppm: 399.748619 MHz  
 processed size: 32768 complex points  
 LB: 0.000 GF: 0.0000  
 Hz/cm: 156.809 ppm/cm: 0.39227

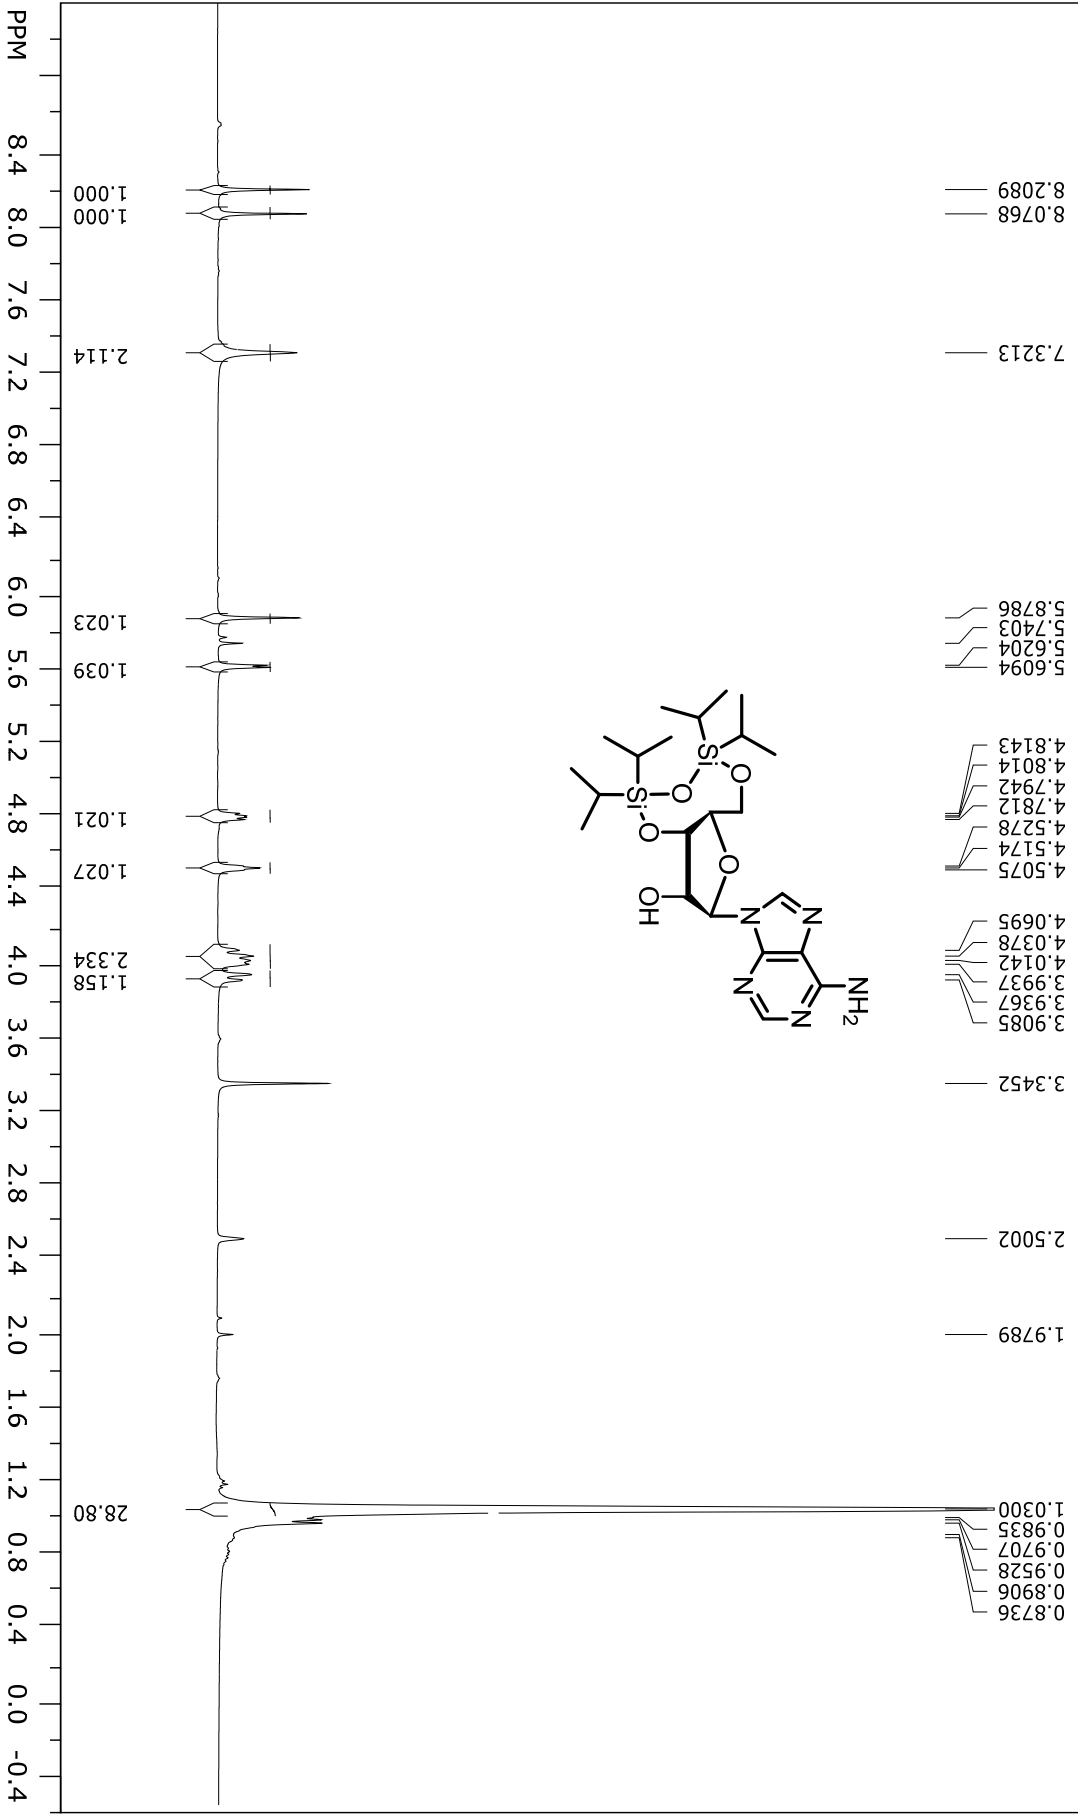

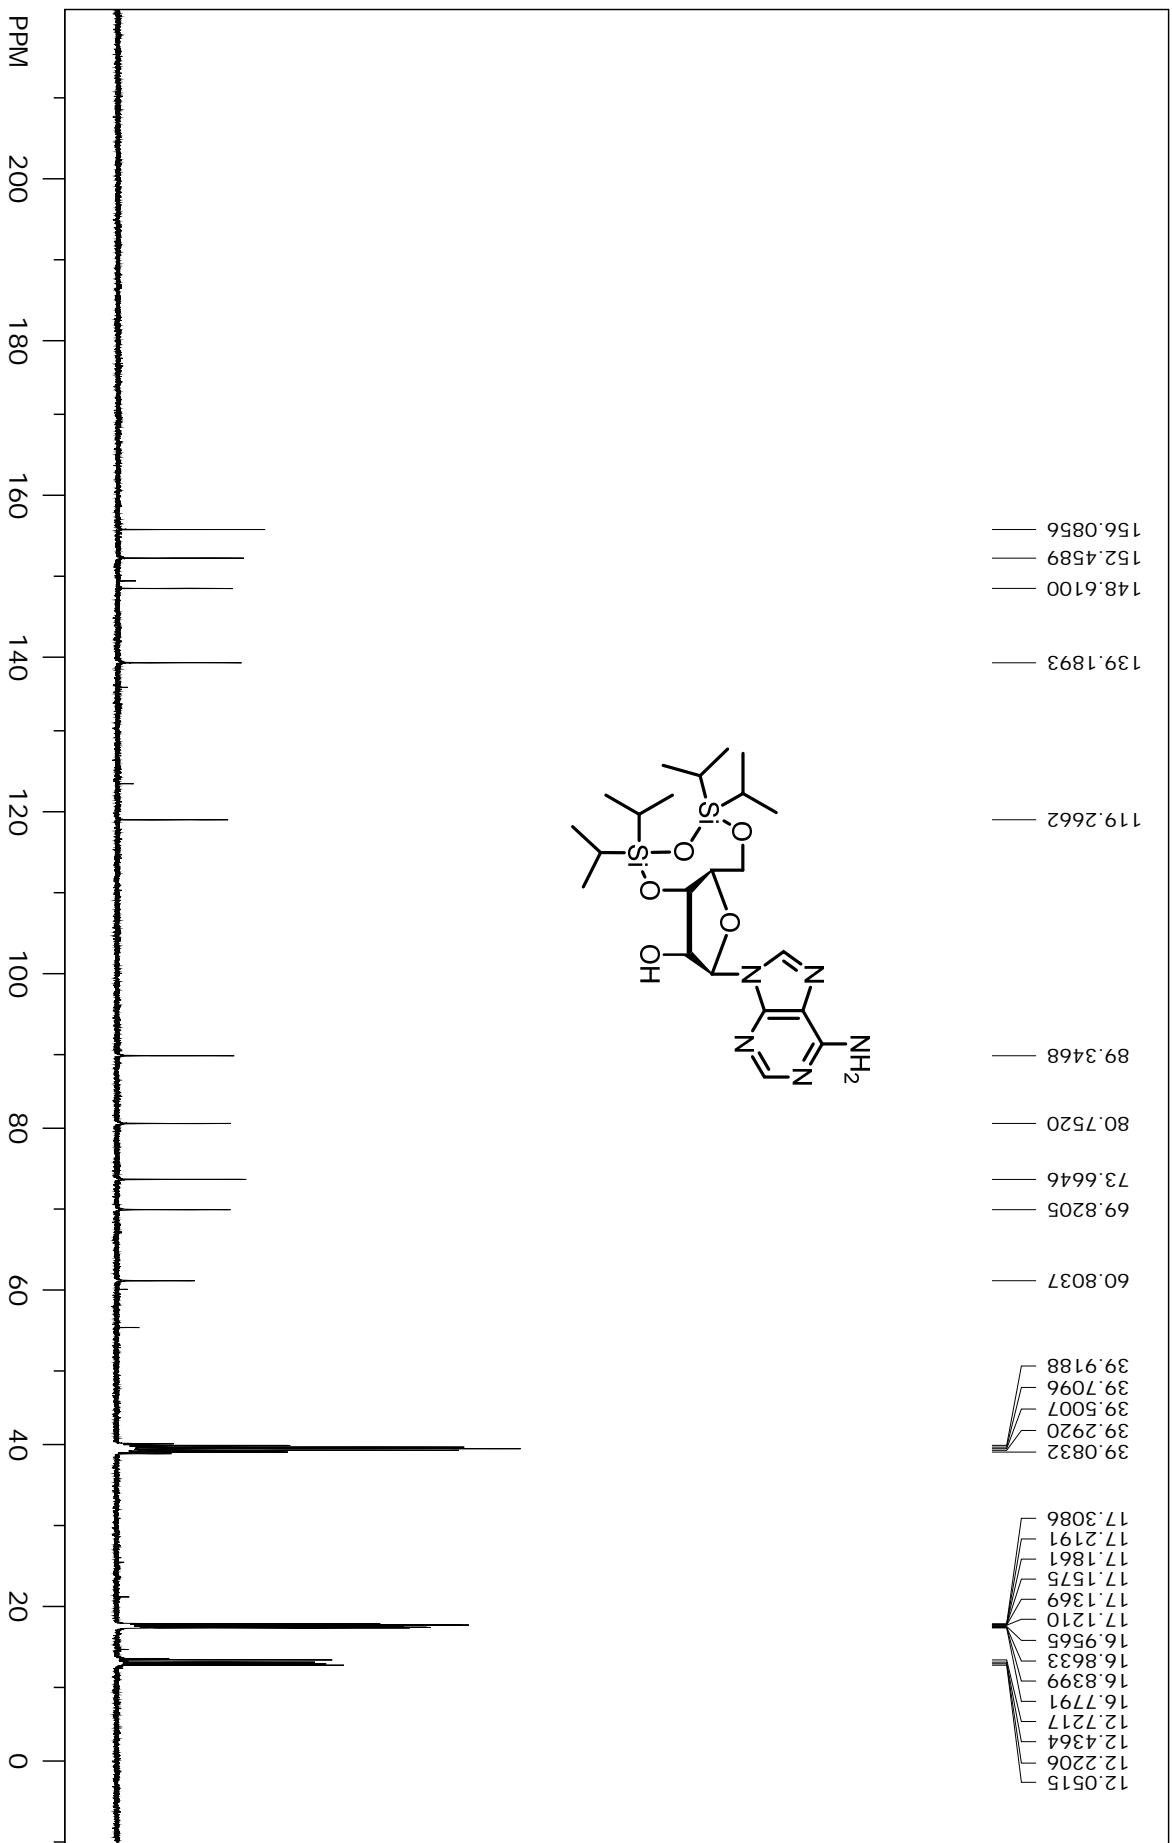

file: ...-01-245-CARBON\_20131014\_01.fid\fid block# 1 expt: "szpul"  
 transmitter freq.: 100.527931 MHz  
 time domain size: 65536 points  
 width: 25000.00 Hz = 248.6871 ppm = 0.381470 Hz/pt  
 number of scans: 512

freq. of 0 ppm: 100.516917 MHz  
 processed size: 65536 complex points  
 LB: 0.000 GF: 0.0000  
 Hz/cm: 934.444 ppm/cm: 9.29537

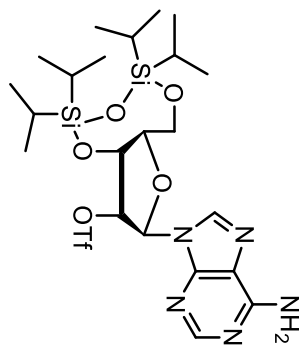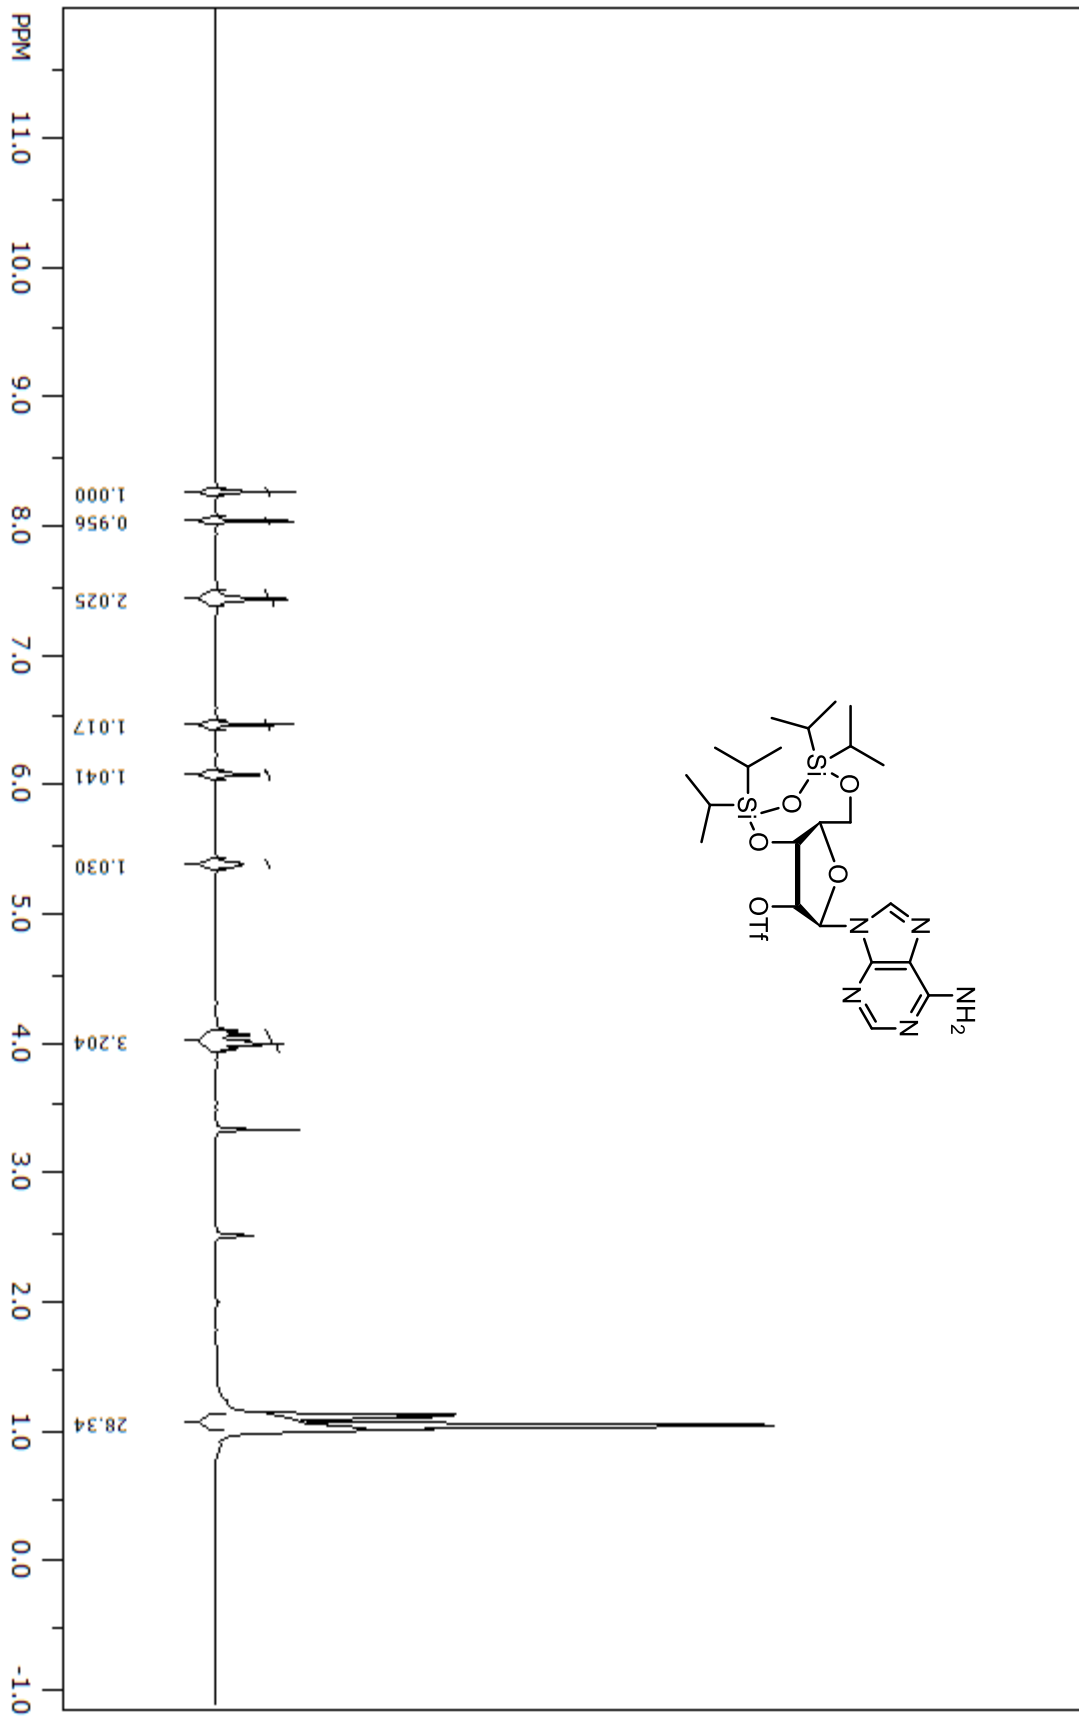

file: ...-01-007-PROTON\_20140213\_01.fid\fid block= 1 expt: "szpul"  
 transmitter freq.: 399.744517 MHz  
 time domain size: 32768 points  
 width: 6410.26 Hz = 16.0359 ppm = 0.195626 Hz/pt  
 number of scans: 64

freq. of 0 ppm: 399.742112 MHz  
 processed size: 32768 complex points  
 LB: 0.000 GF: 0.0000  
 Hz/cm: 210.108 ppm/cm: 0.52561

file: ...-01-007-CARBON\_20140214\_01.fid\hd block# 1 exp: "szpul"  
 transmitter freq.: 100.526292 MHz  
 time domain size: 65536 points  
 width: 25000.00 Hz = 248.6912 ppm = 0.381470 Hz/pt  
 number of scans: 6500

freq. of 0 ppm: 100.515236 MHz  
 processed size: 65536 complex points  
 LB: 0.000 GF: 0.0000  
 Hz/cm: 1000.000 ppm/cm: 9.94765

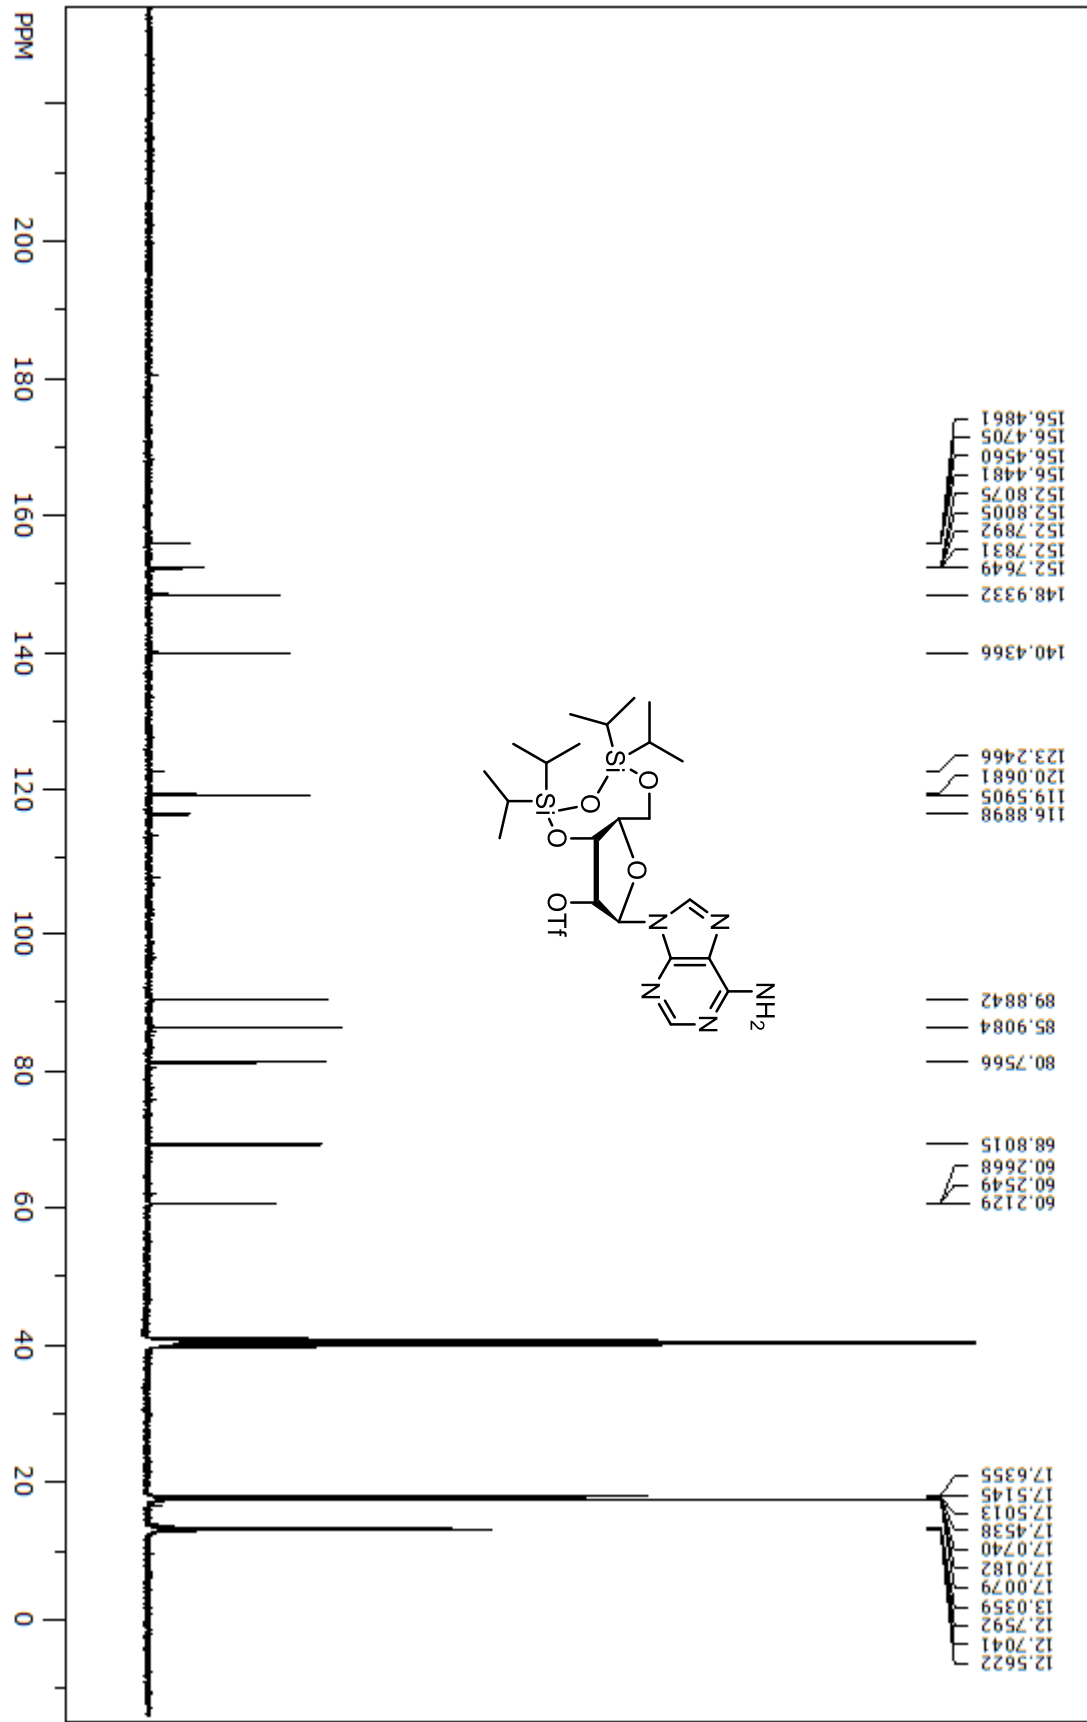

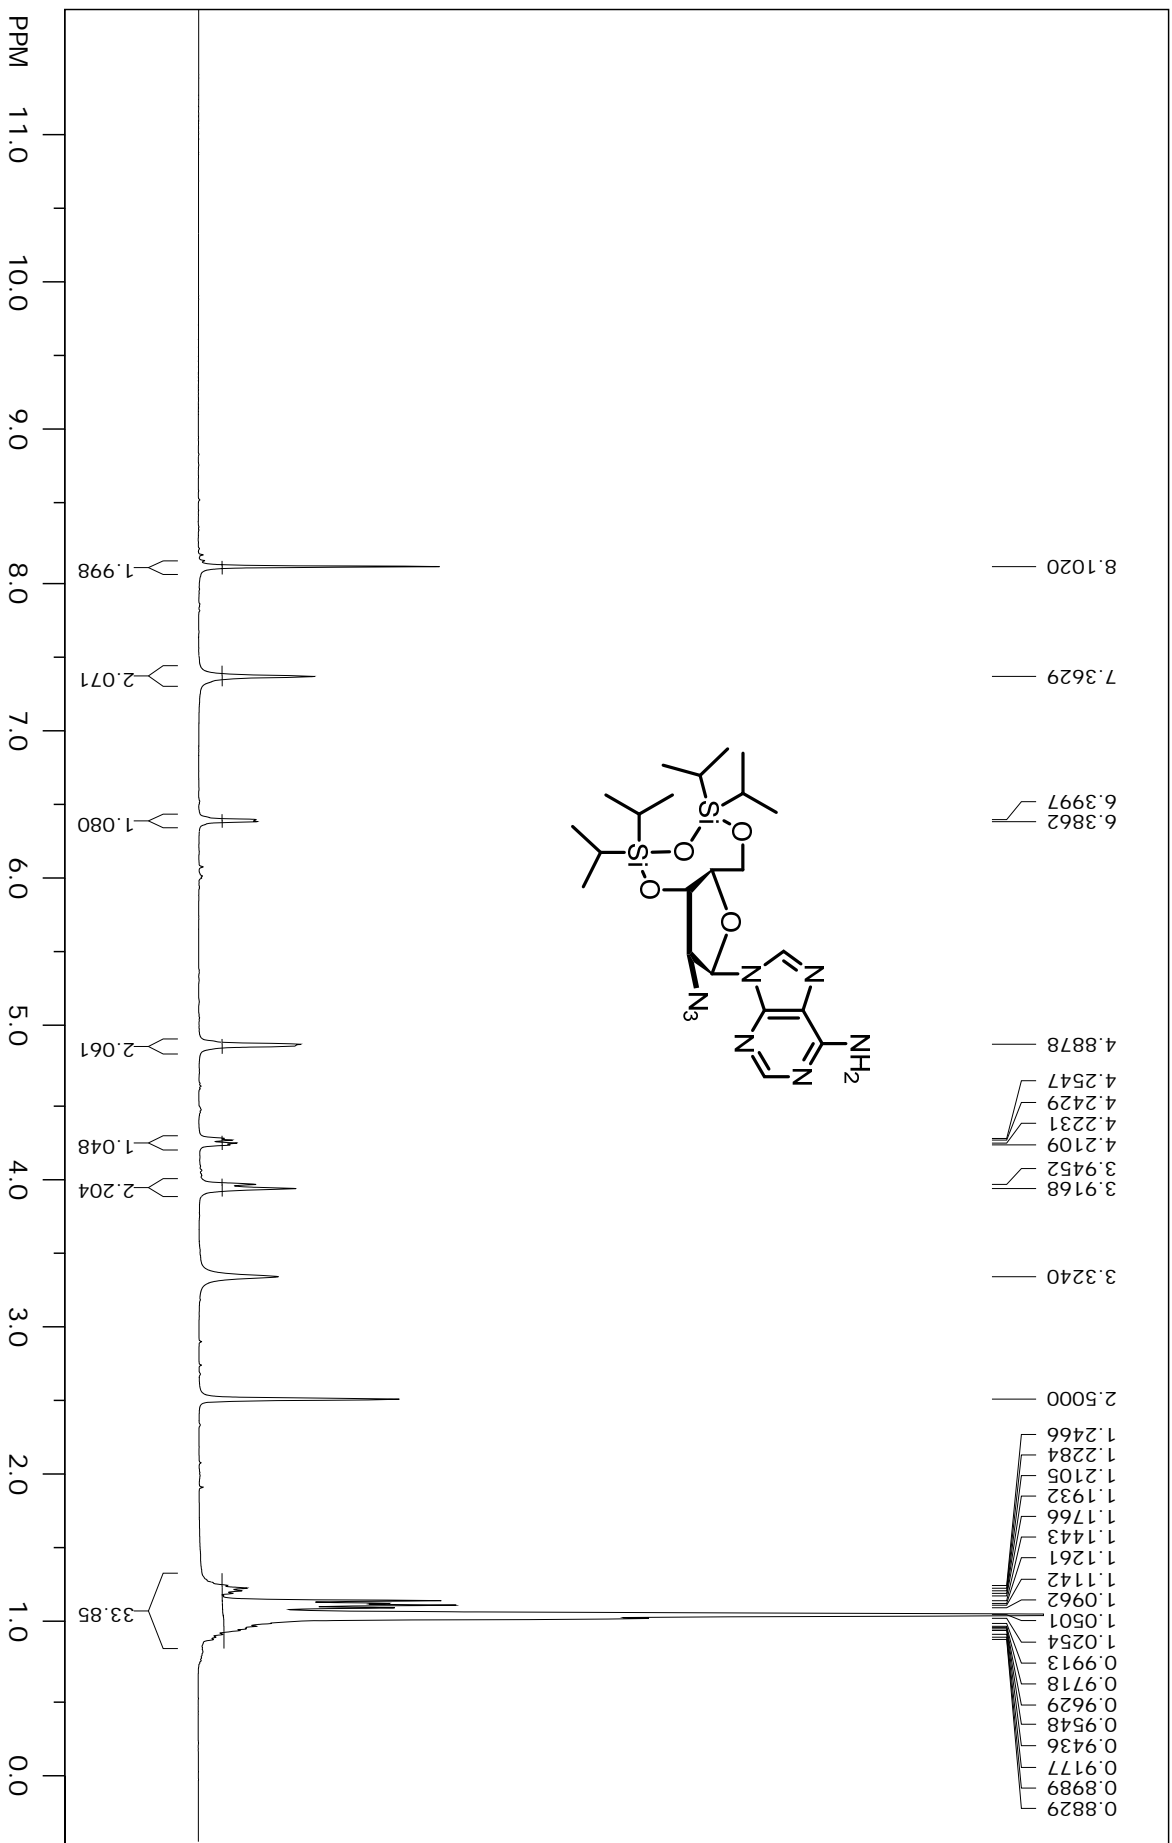

file: ...1-171-2-PROTON\_20131014\_01.fid\fid block# 1 exp1: "szpu1"  
 transmitter freq.: 399.751031 MHz  
 time domain size: 32768 points  
 width: 6410.26 Hz = 16.0356 ppm = 0.195626 Hz/pt  
 number of scans: 128

freq. of 0 ppm: 399.748619 MHz  
 processed size: 32768 complex points  
 LB: 0.000 GF: 0.0000  
 Hz/cm: 197.151 ppm/cm: 0.49318

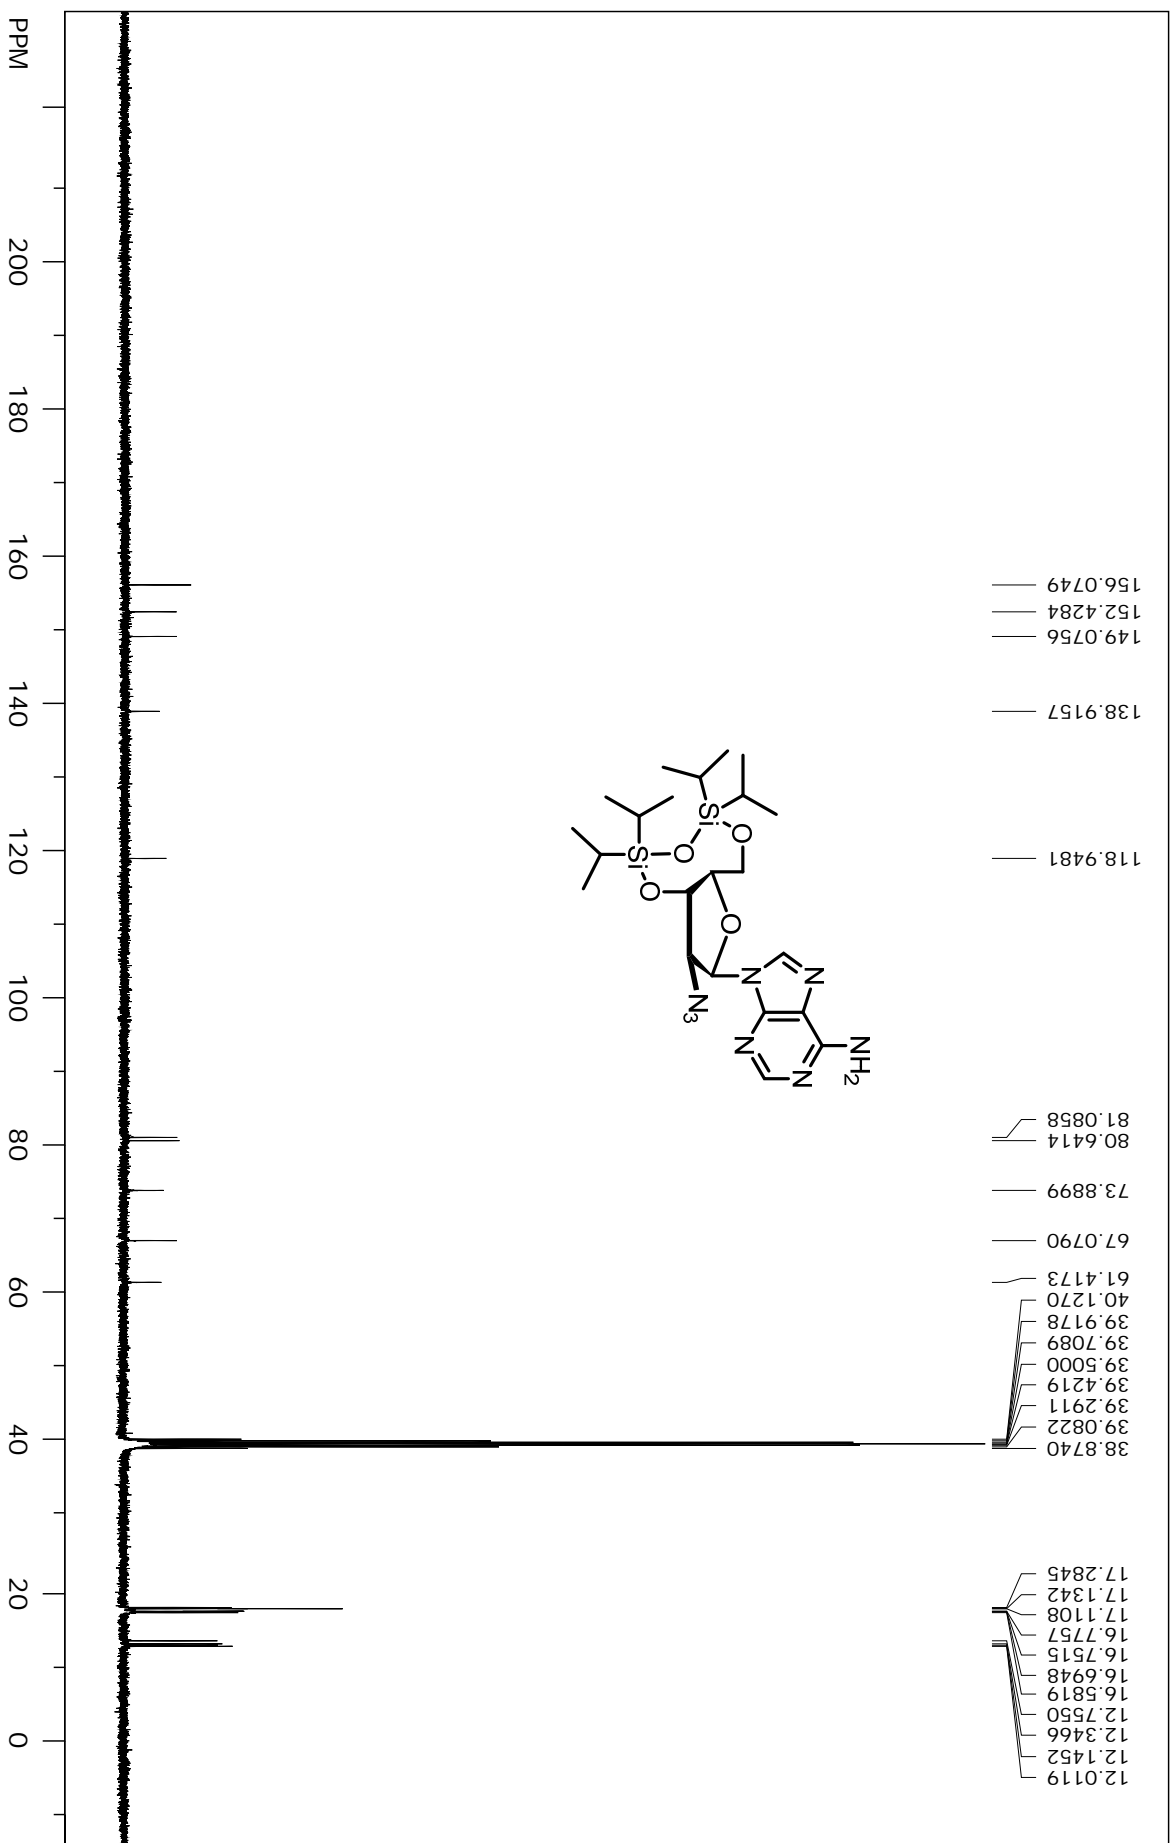

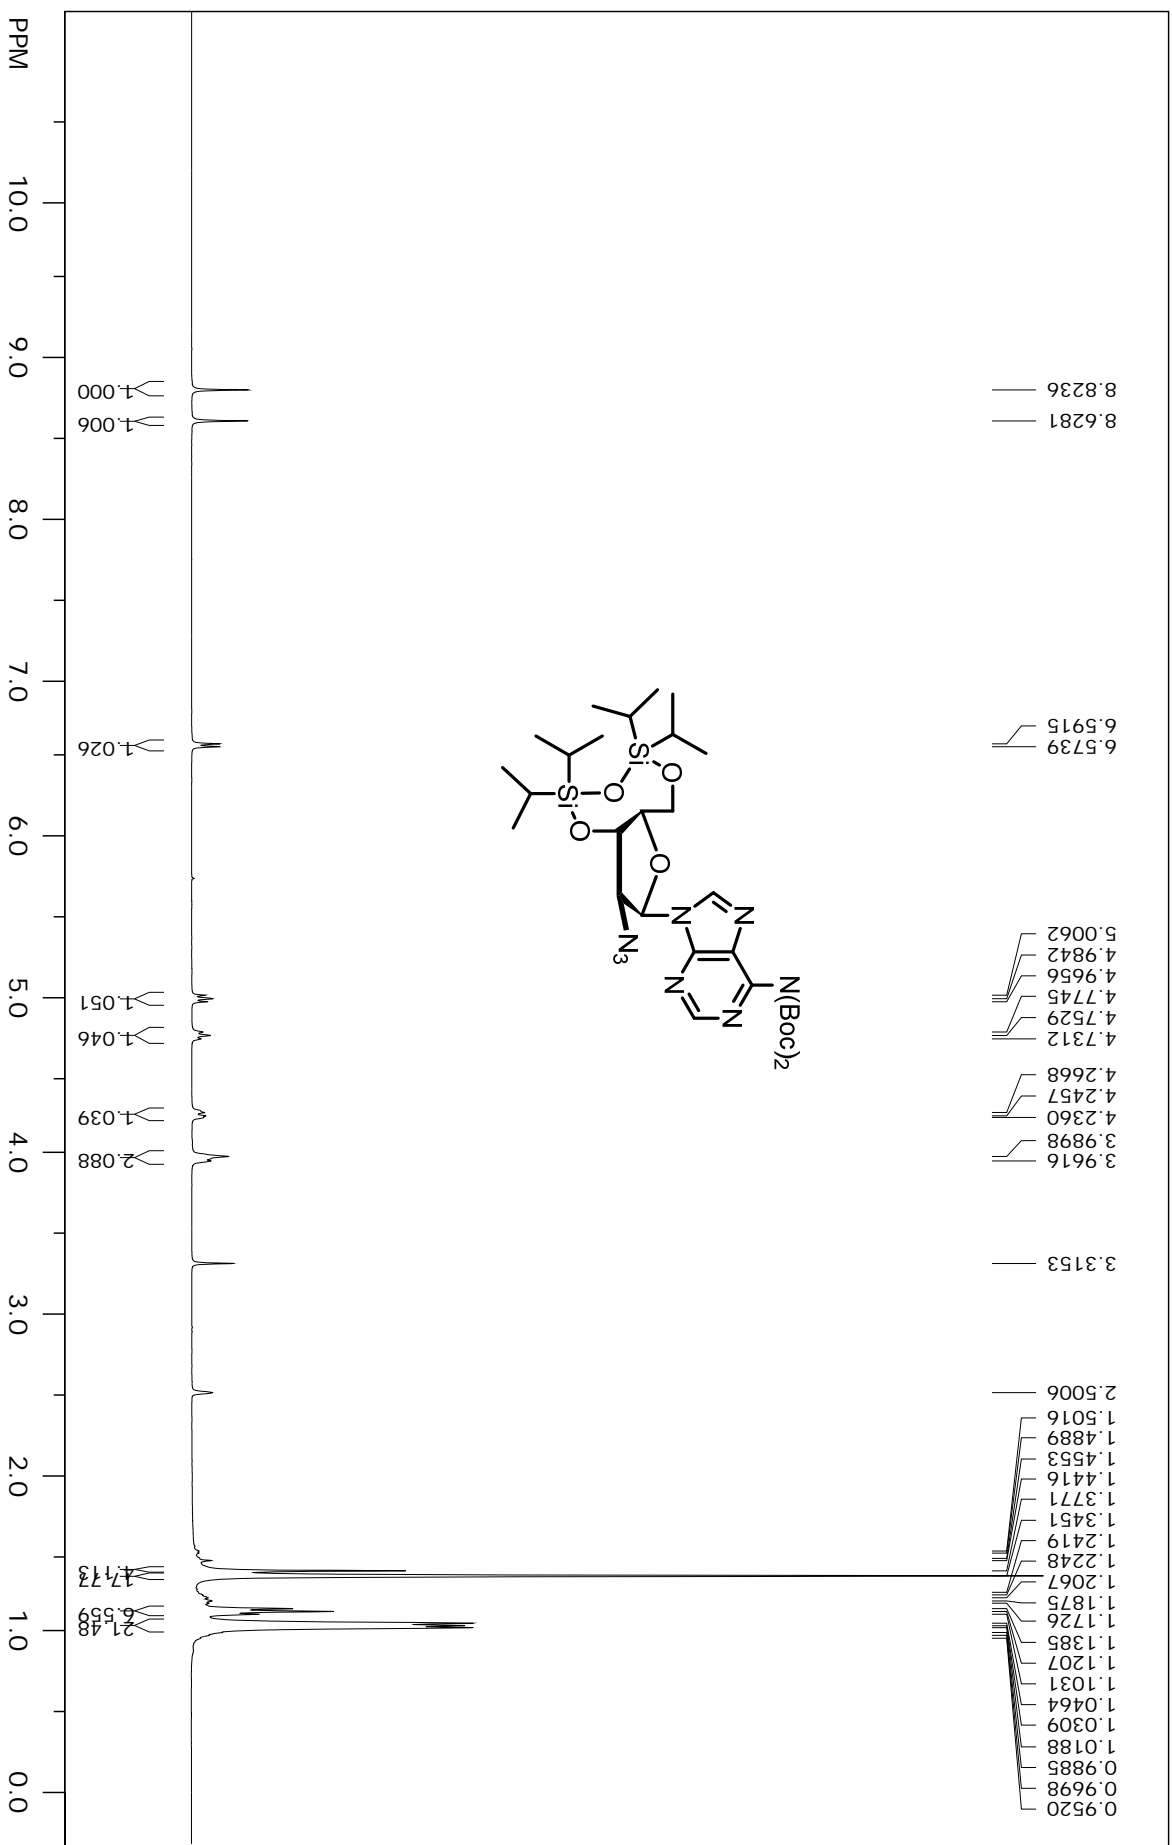

file: ...-01-251-PROTON\_20131015\_01.fid\fid block# 1 exp1: "szpu1"  
 transmitter freq.: 399.751031 MHz  
 time domain size: 32768 points  
 width: 6410.26 Hz = 16.0356 ppm = 0.195626 Hz/pt  
 number of scans: 32

freq. of 0 ppm: 399.748619 MHz  
 processed size: 32768 complex points  
 LB: 0.000 GF: 0.0000  
 Hz/cm: 184.758 ppm/cm: 0.46218



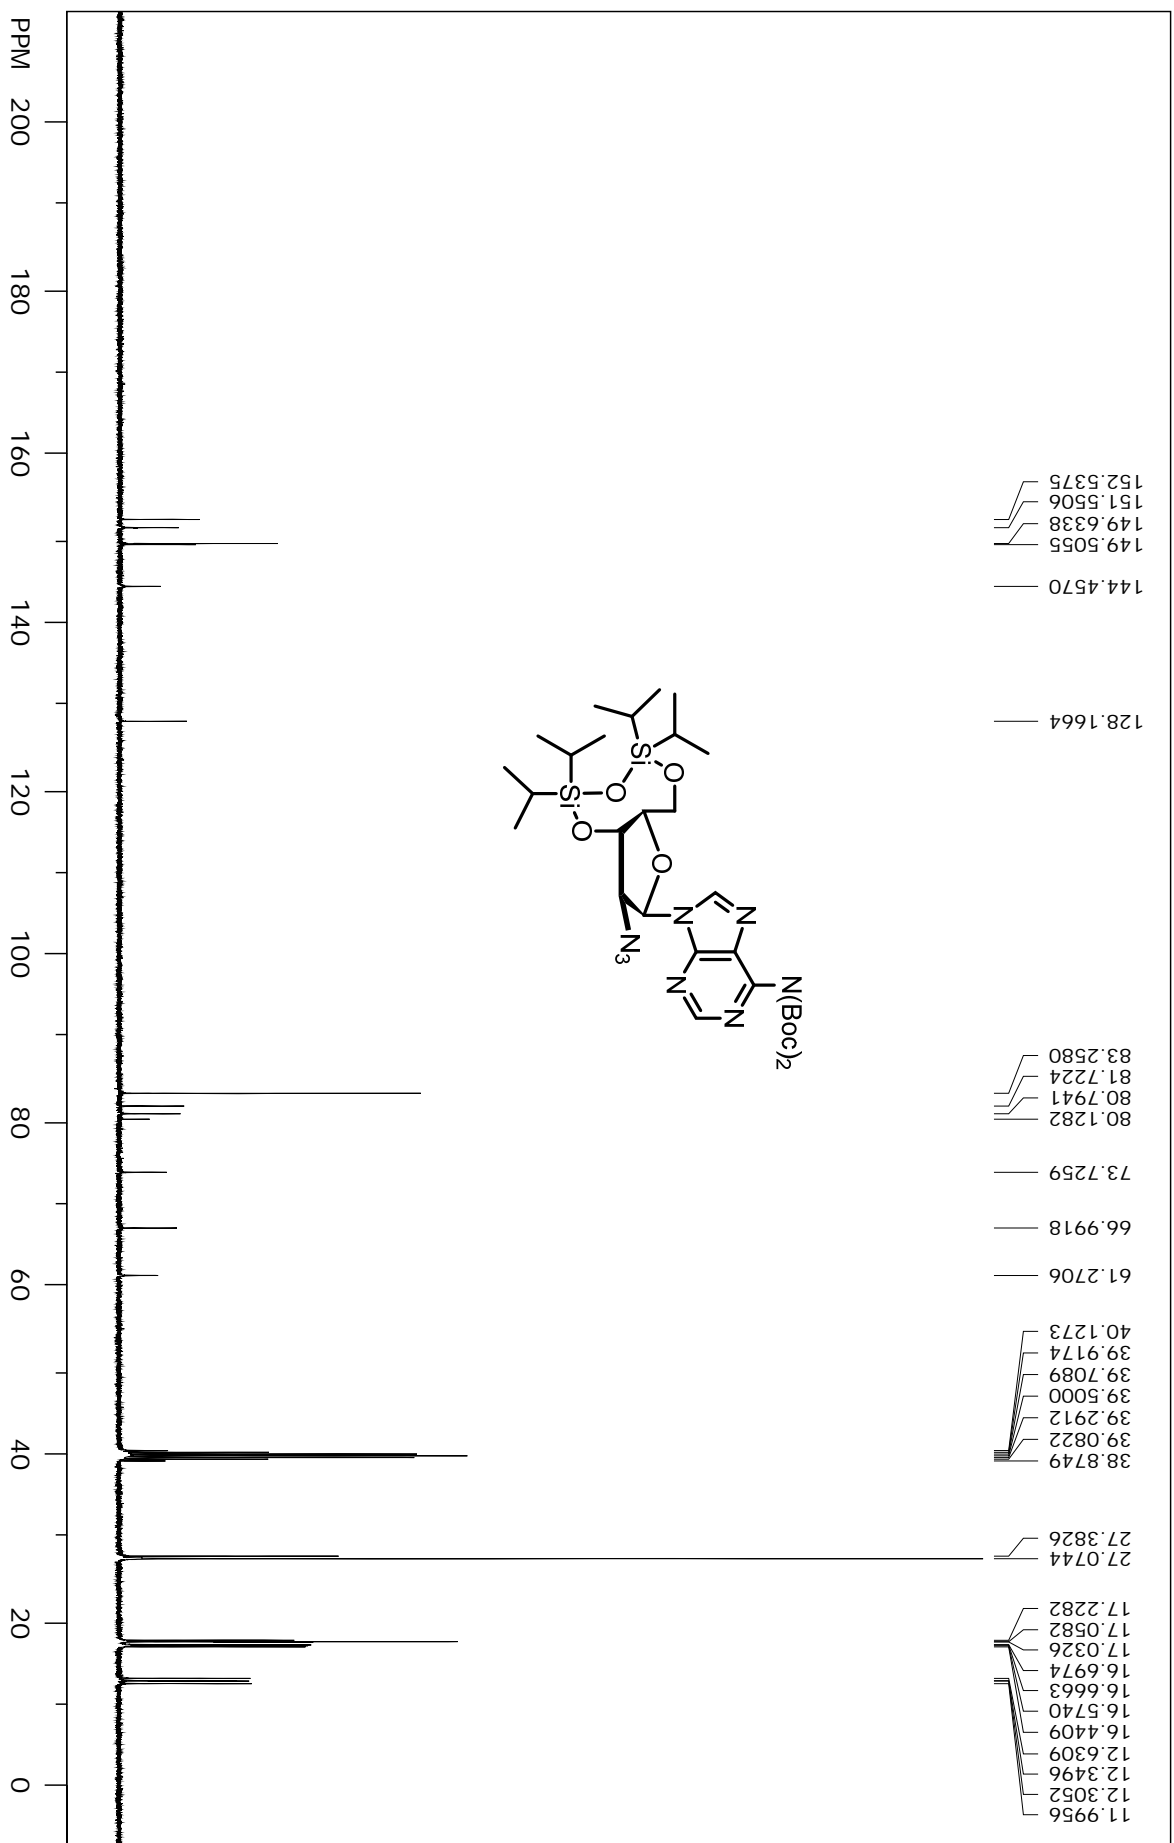

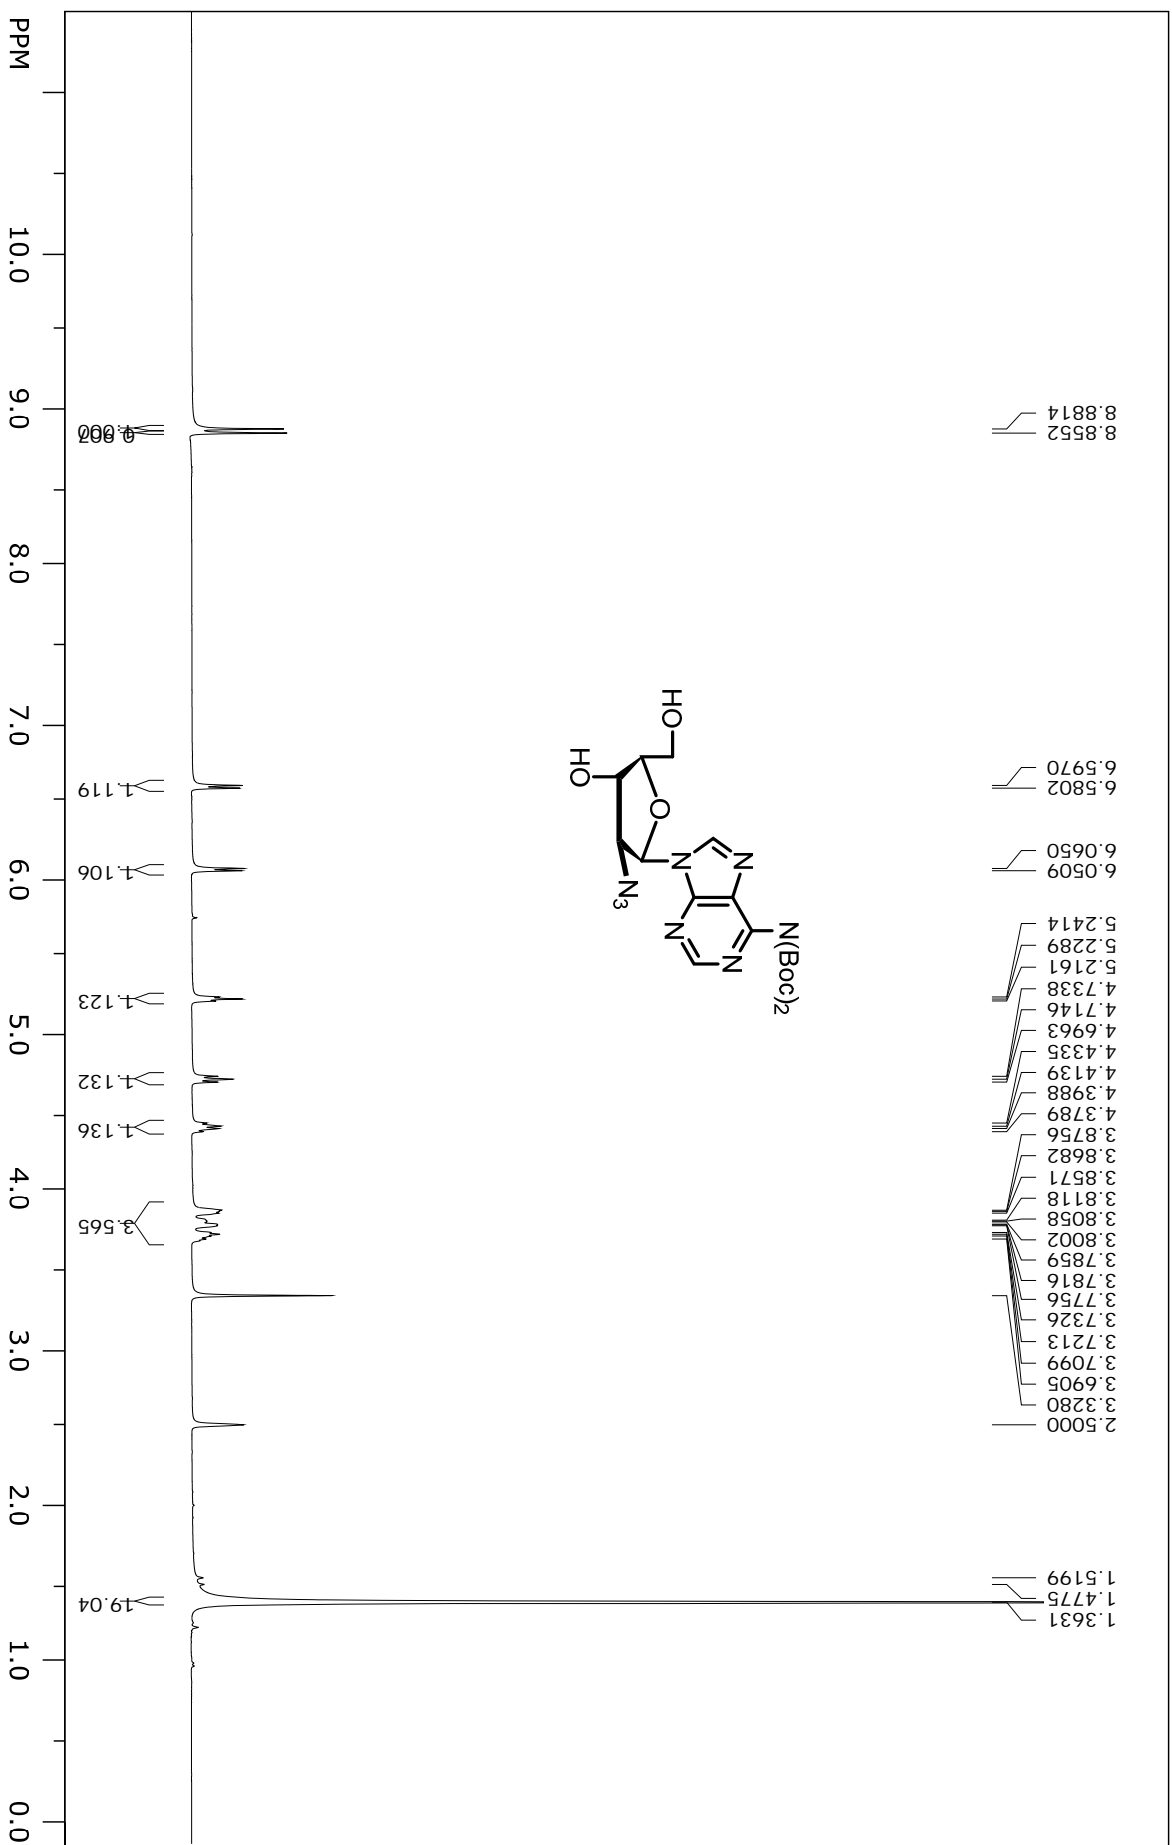

file: ...-01-253-PROTON\_20131015\_01.fid\fid block# 1 expt: "szpu1"  
 transmitter freq.: 399.751031 MHz  
 time domain size: 32768 points  
 width: 6410.26 Hz = 16.0356 ppm = 0.195626 Hz/pt  
 number of scans: 32

freq. of 0 ppm: 399.748620 MHz  
 processed size: 32768 complex points  
 LB: 0.000 GF: 0.0000  
 Hz/cm: 187.749 ppm/cm: 0.46967

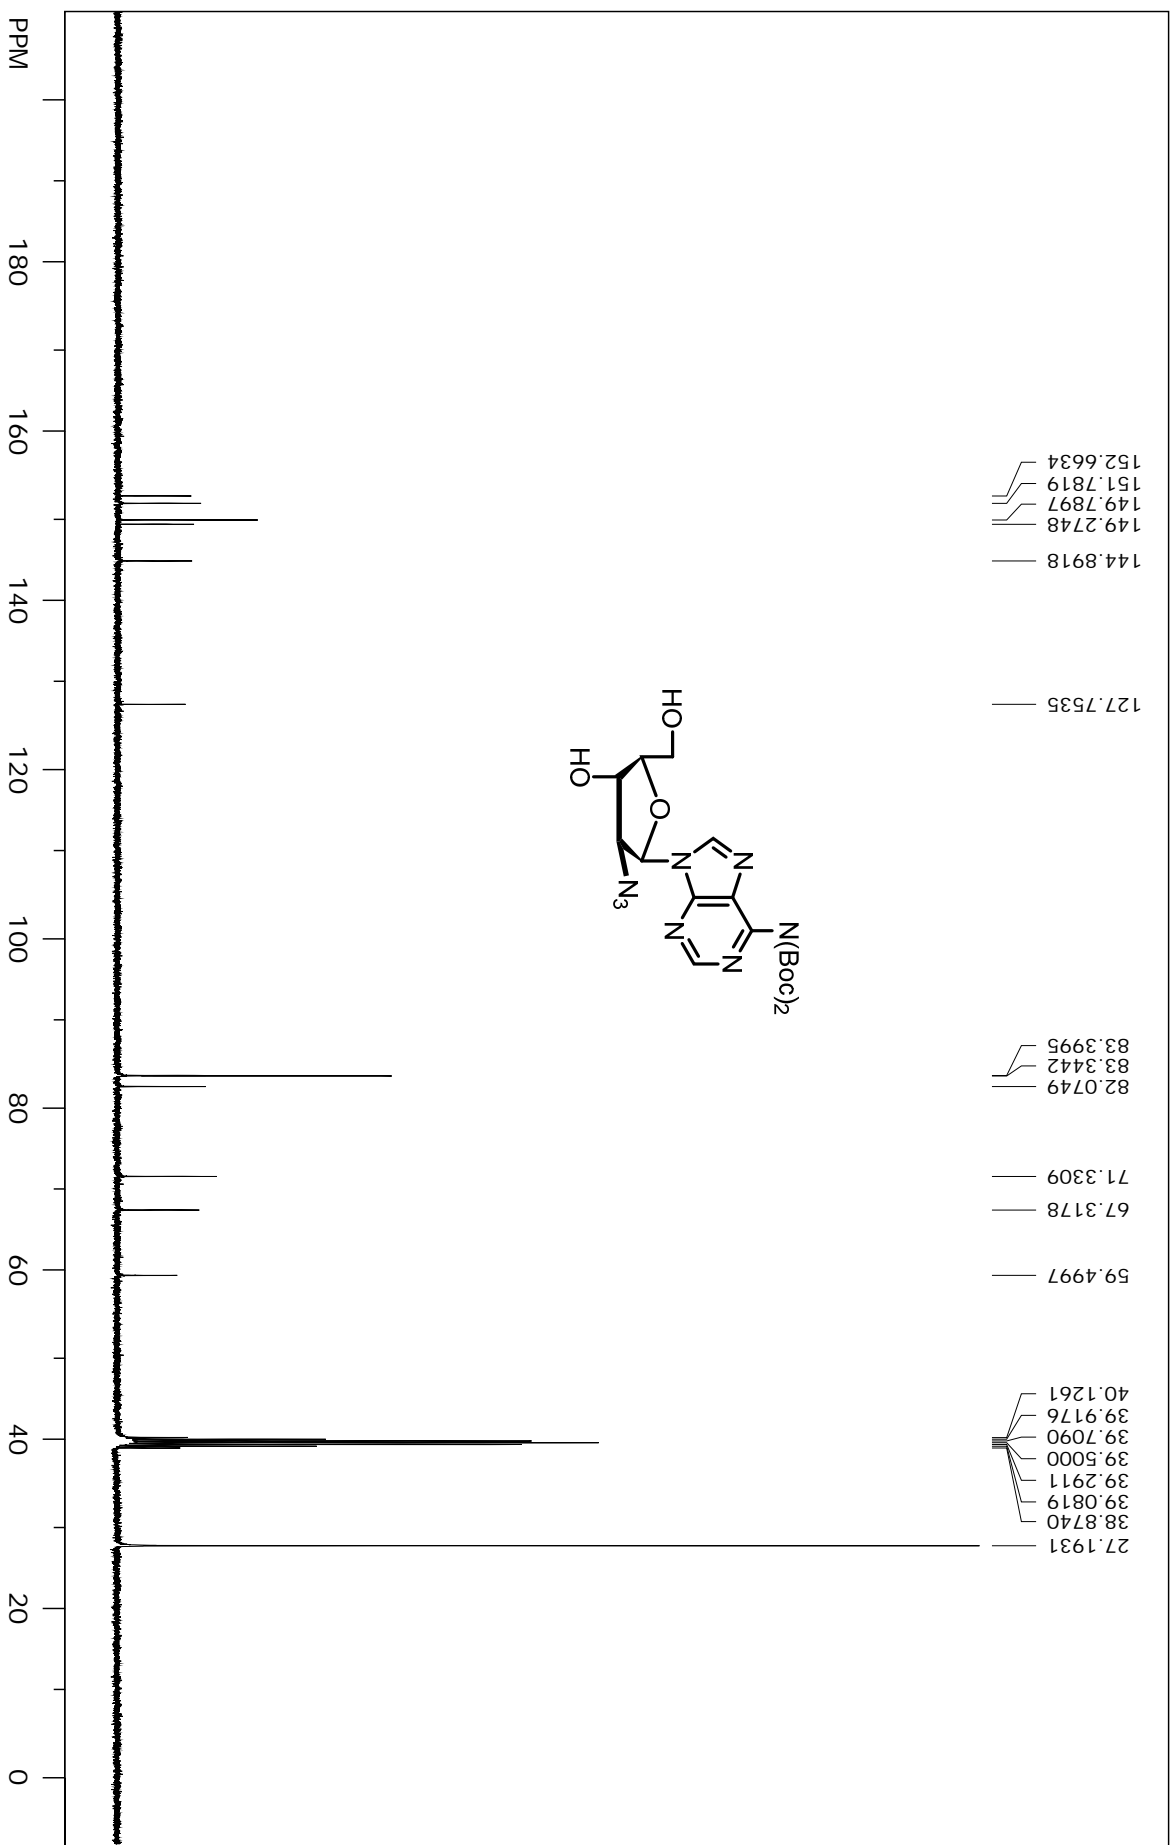

file: ...-01-253-CARBON\_20131015\_01.fid\fid block# 1 expt: "szpul"  
 transmitter freq.: 100.527931 MHz  
 time domain size: 65536 points  
 width: 25000.00 Hz = 248.6871 ppm = 0.381470 Hz/pt  
 number of scans: 500

freq. of 0 ppm: 100.516918 MHz  
 processed size: 65536 complex points  
 LB: 0.000 GF: 0.0000  
 Hz/cm: 880.556 ppm/cm: 8.75931

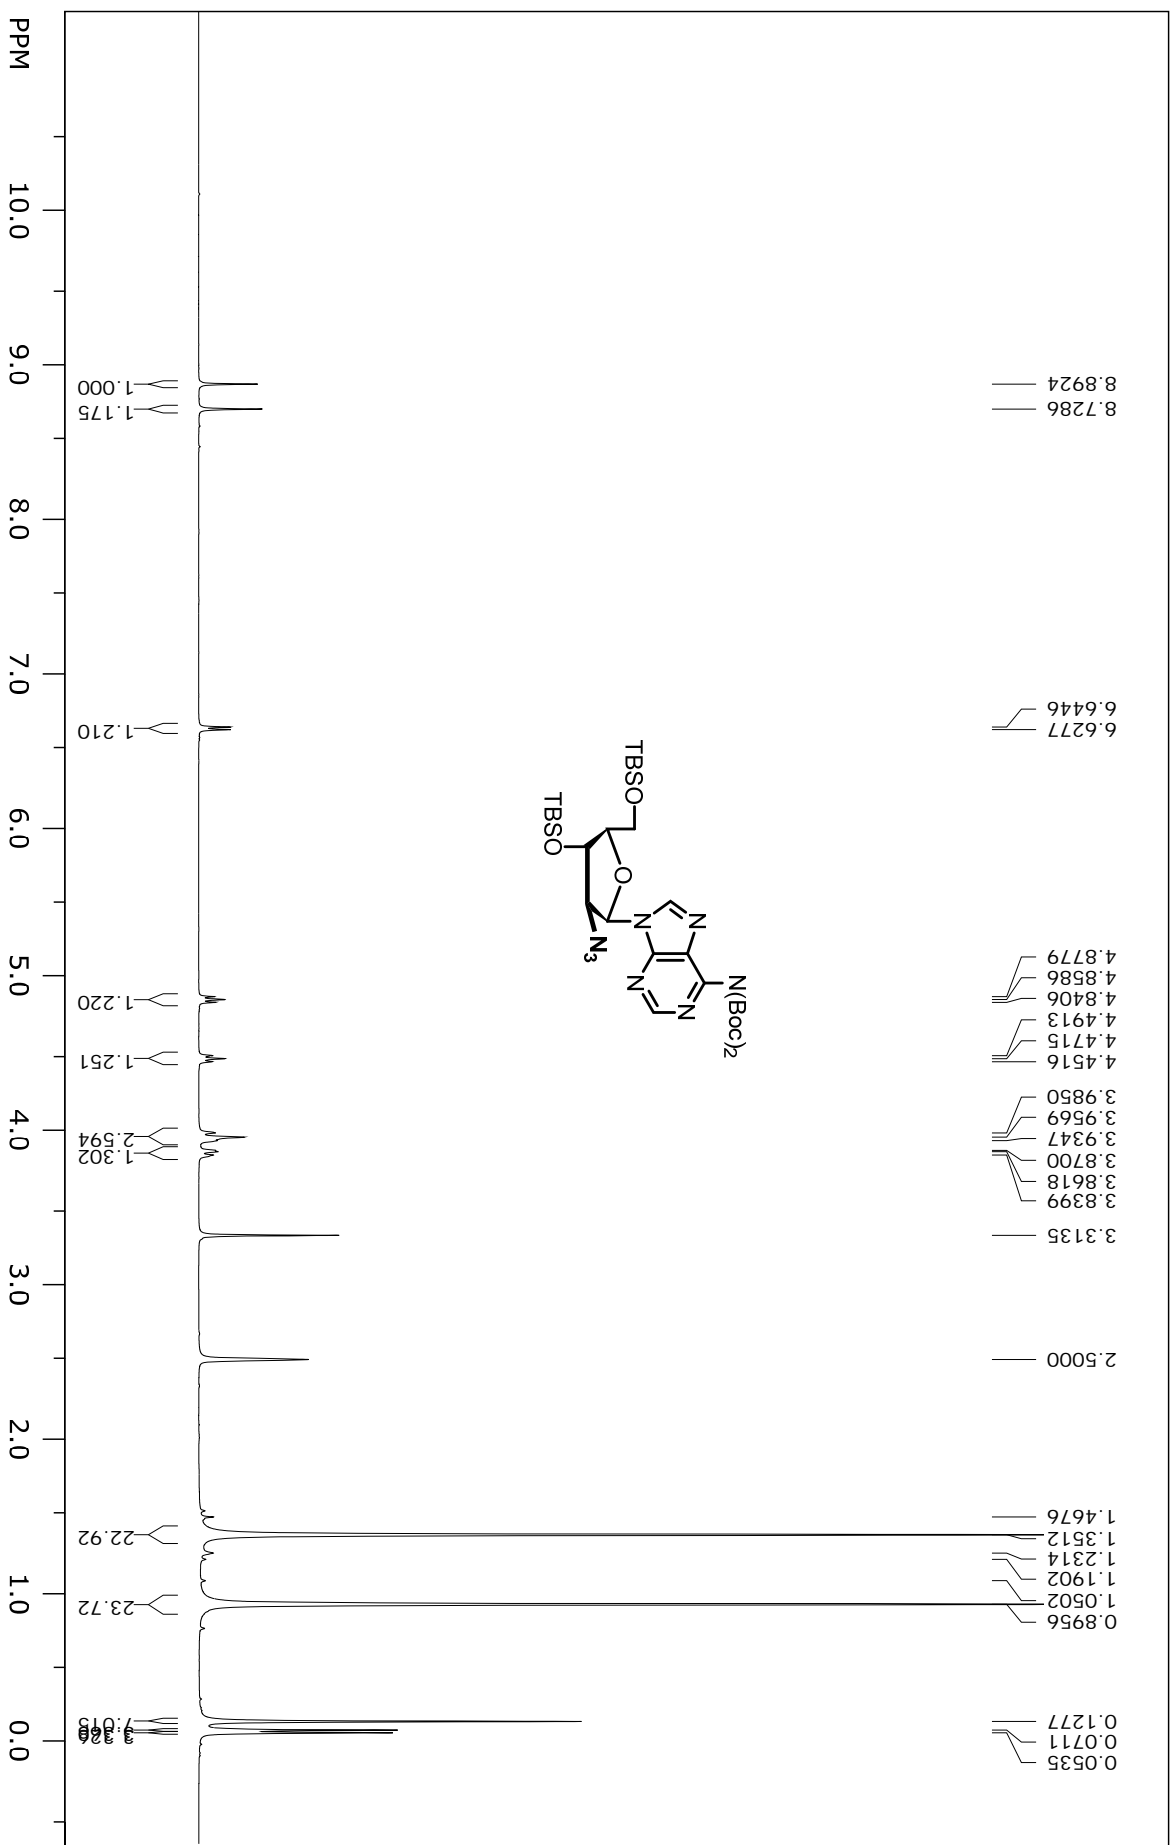

file: ...-01-125-PROTON\_20131015\_01.fid\fid block# 1 exp1: "szpu1"  
 transmitter freq.: 399.751031 MHz  
 time domain size: 32768 points  
 width: 6410.26 Hz = 16.0356 ppm = 0.195626 Hz/pt  
 number of scans: 128

freq. of 0 ppm: 399.748619 MHz  
 processed size: 32768 complex points  
 LB: 0.000 GF: 0.0000  
 Hz/cm: 192.023 ppm/cm: 0.48036

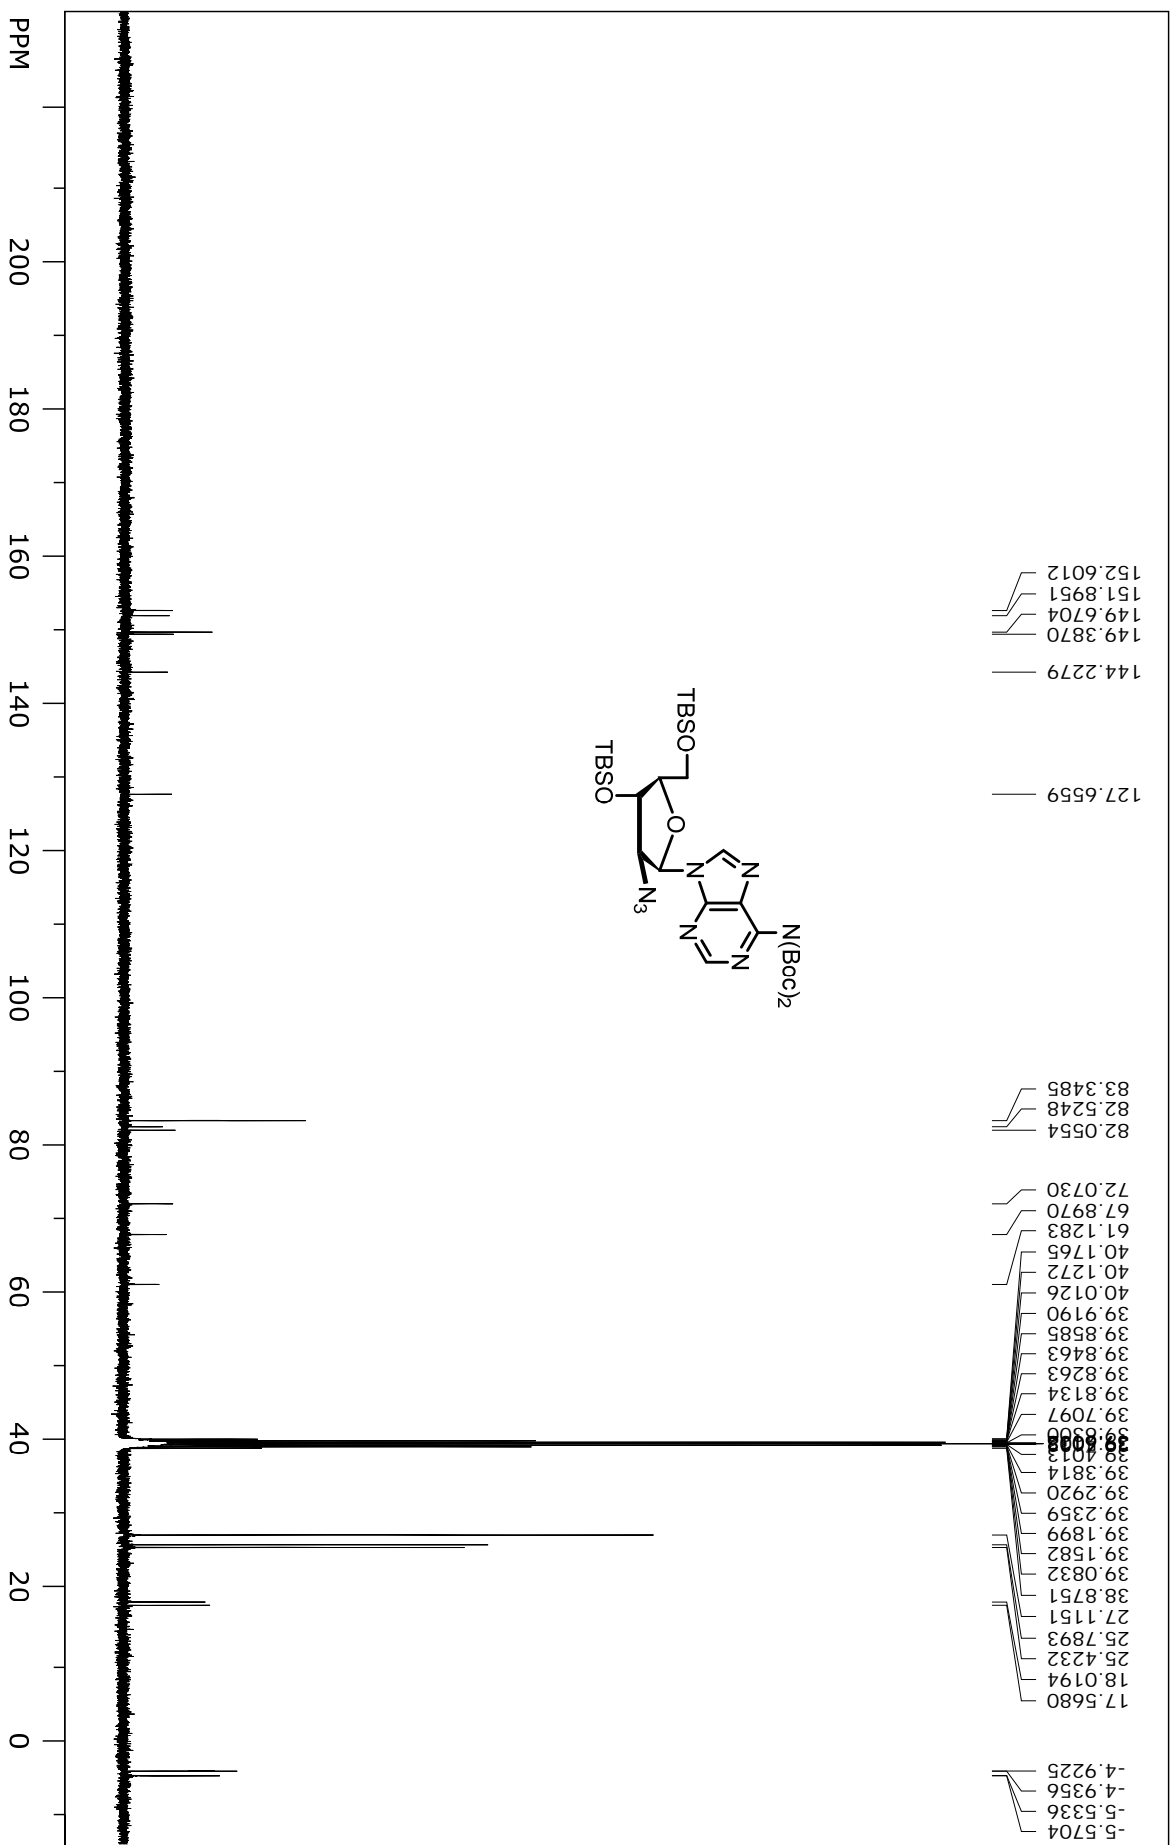

file: ...-01-125-CARBON\_20131015\_01.fid\fid block# 1 expt: "szpul"  
 transmitter freq.: 100.527931 MHz  
 time domain size: 65536 points  
 width: 25000.00 Hz = 248.6871 ppm = 0.381470 Hz/pt  
 number of scans: 750

freq. of 0 ppm: 100.516919 MHz  
 processed size: 65536 complex points  
 LB: 0.000 GF: 0.0000  
 Hz/cm: 1000.000 ppm/cm: 9.94748

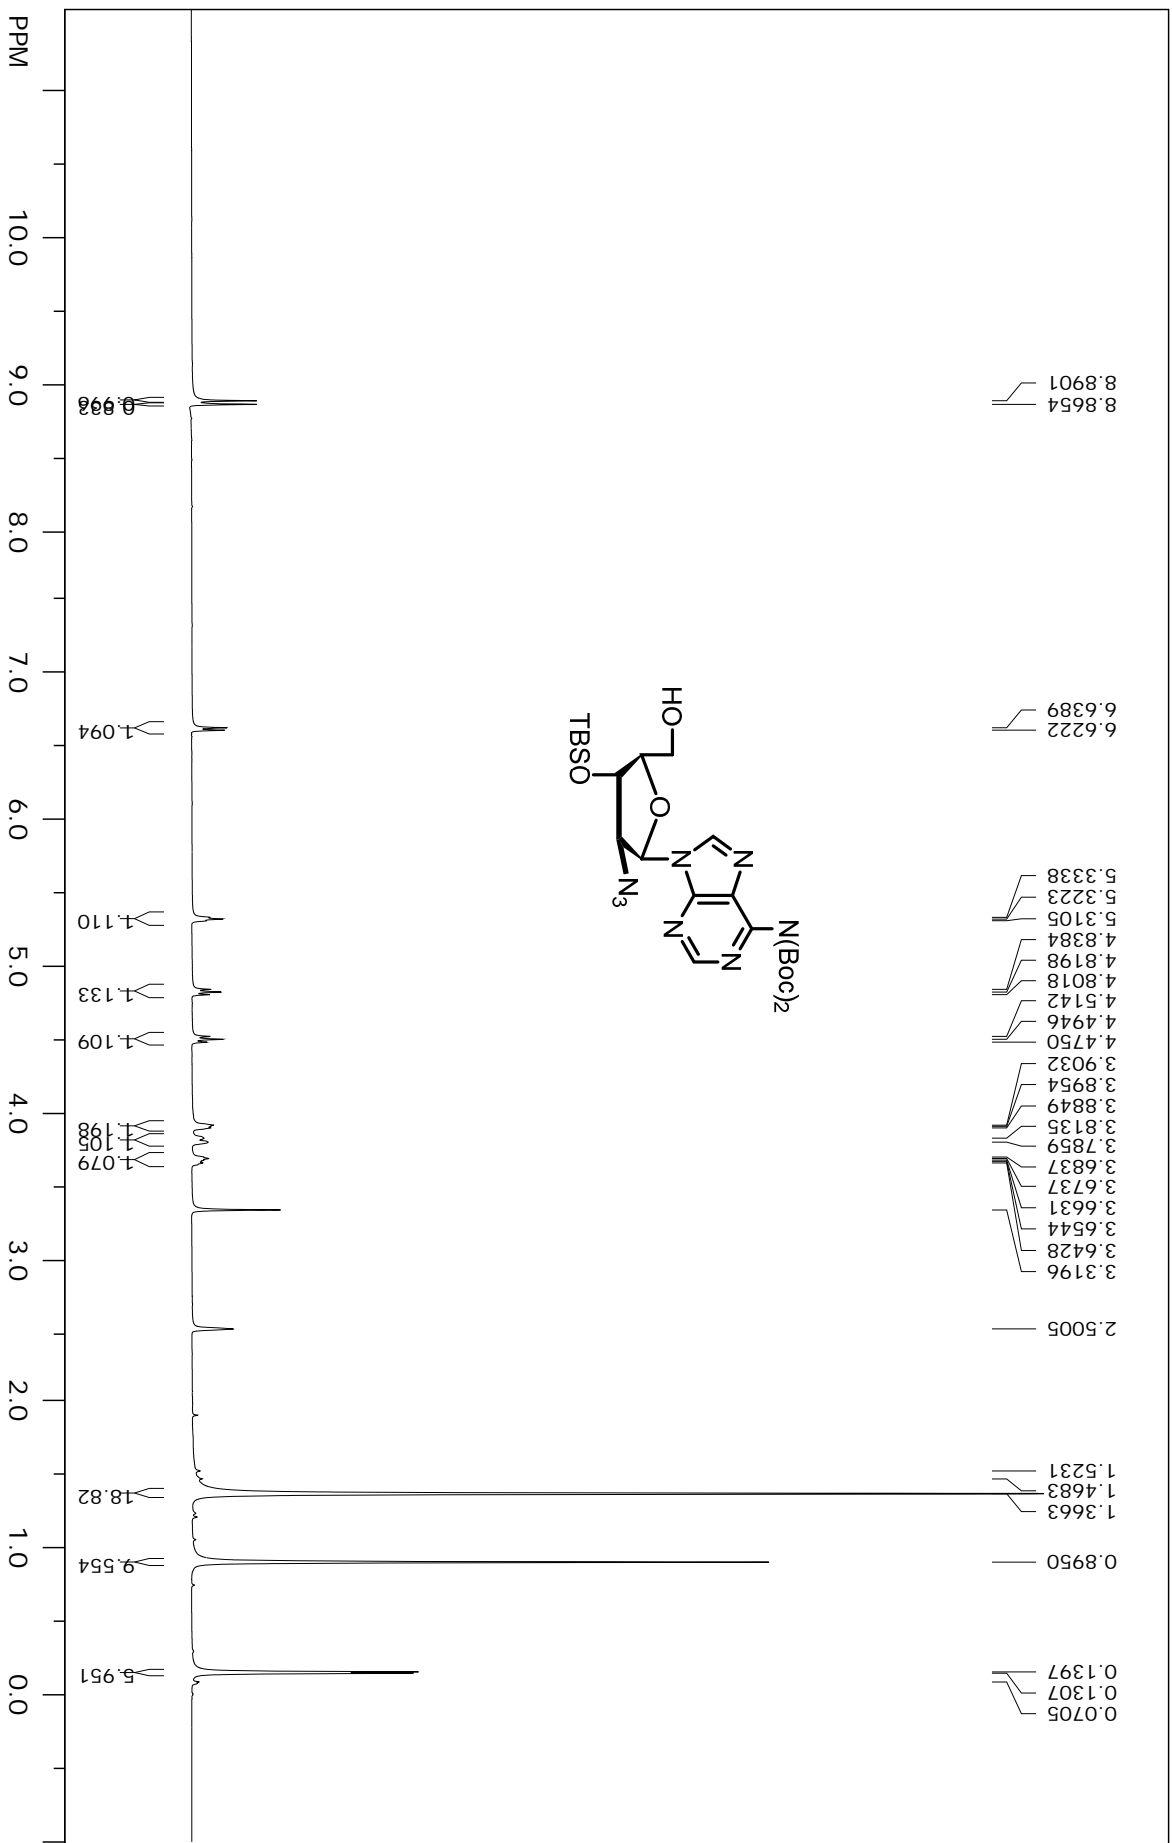

file: ...-01-261-PROTON\_20131015\_01.fid\fid block# 1 expt: "szpu1"  
 transmitter freq.: 399.751031 MHz  
 time domain size: 32768 points  
 width: 6410.26 Hz = 16.0356 ppm = 0.195626 Hz/pt  
 number of scans: 128

freq. of 0 ppm: 399.748619 MHz  
 processed size: 32768 complex points  
 LB: 0.000 GF: 0.0000  
 Hz/cm: 201.709 ppm/cm: 0.50459

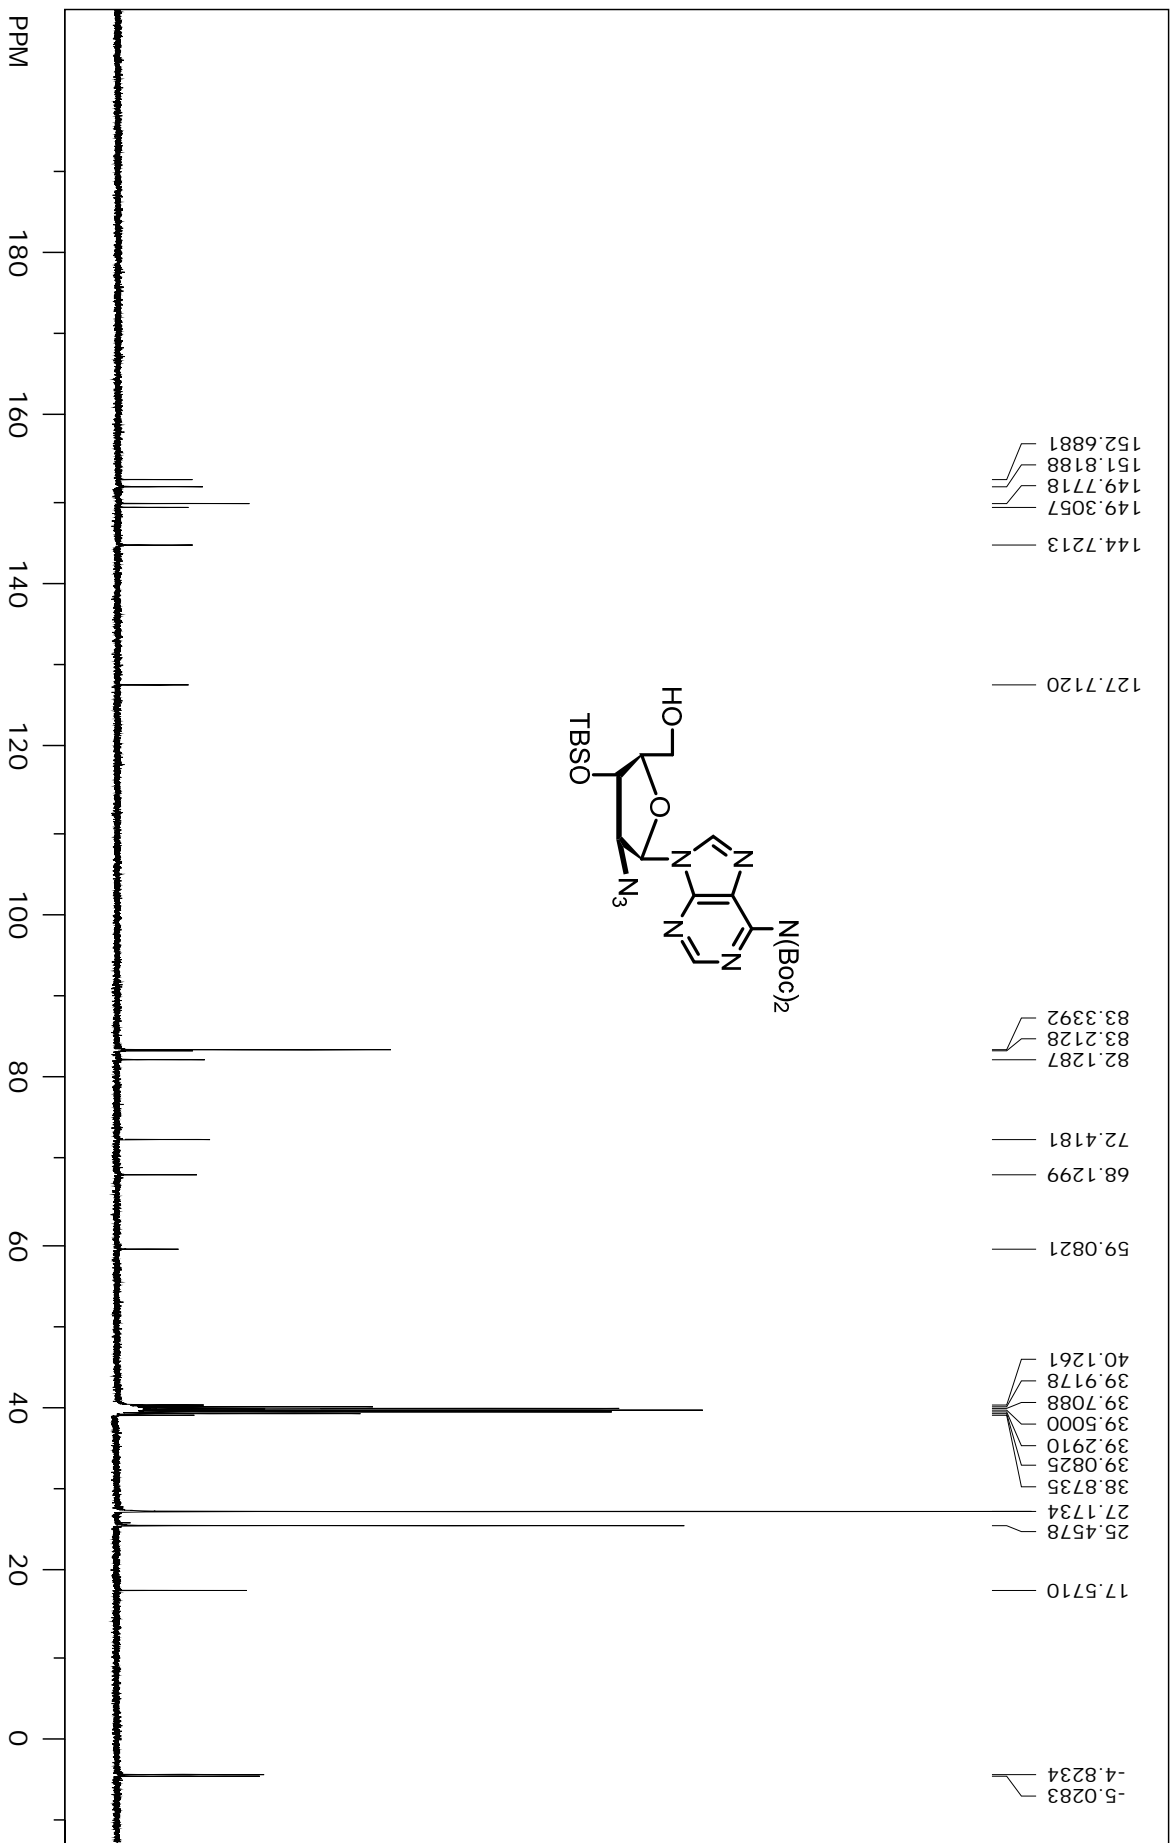

file: ...-01-261-CARBON\_20131015\_01.fid\fid block# 1 expt: "szpul"  
 transmitter freq.: 100.527931 MHz  
 time domain size: 65536 points  
 width: 25000.00 Hz = 248.6871 ppm = 0.381470 Hz/pt  
 number of scans: 750

freq. of 0 ppm: 100.516919 MHz  
 processed size: 65536 complex points  
 LB: 0.000 GF: 0.0000  
 Hz/cm: 896.111 ppm/cm: 8.91405





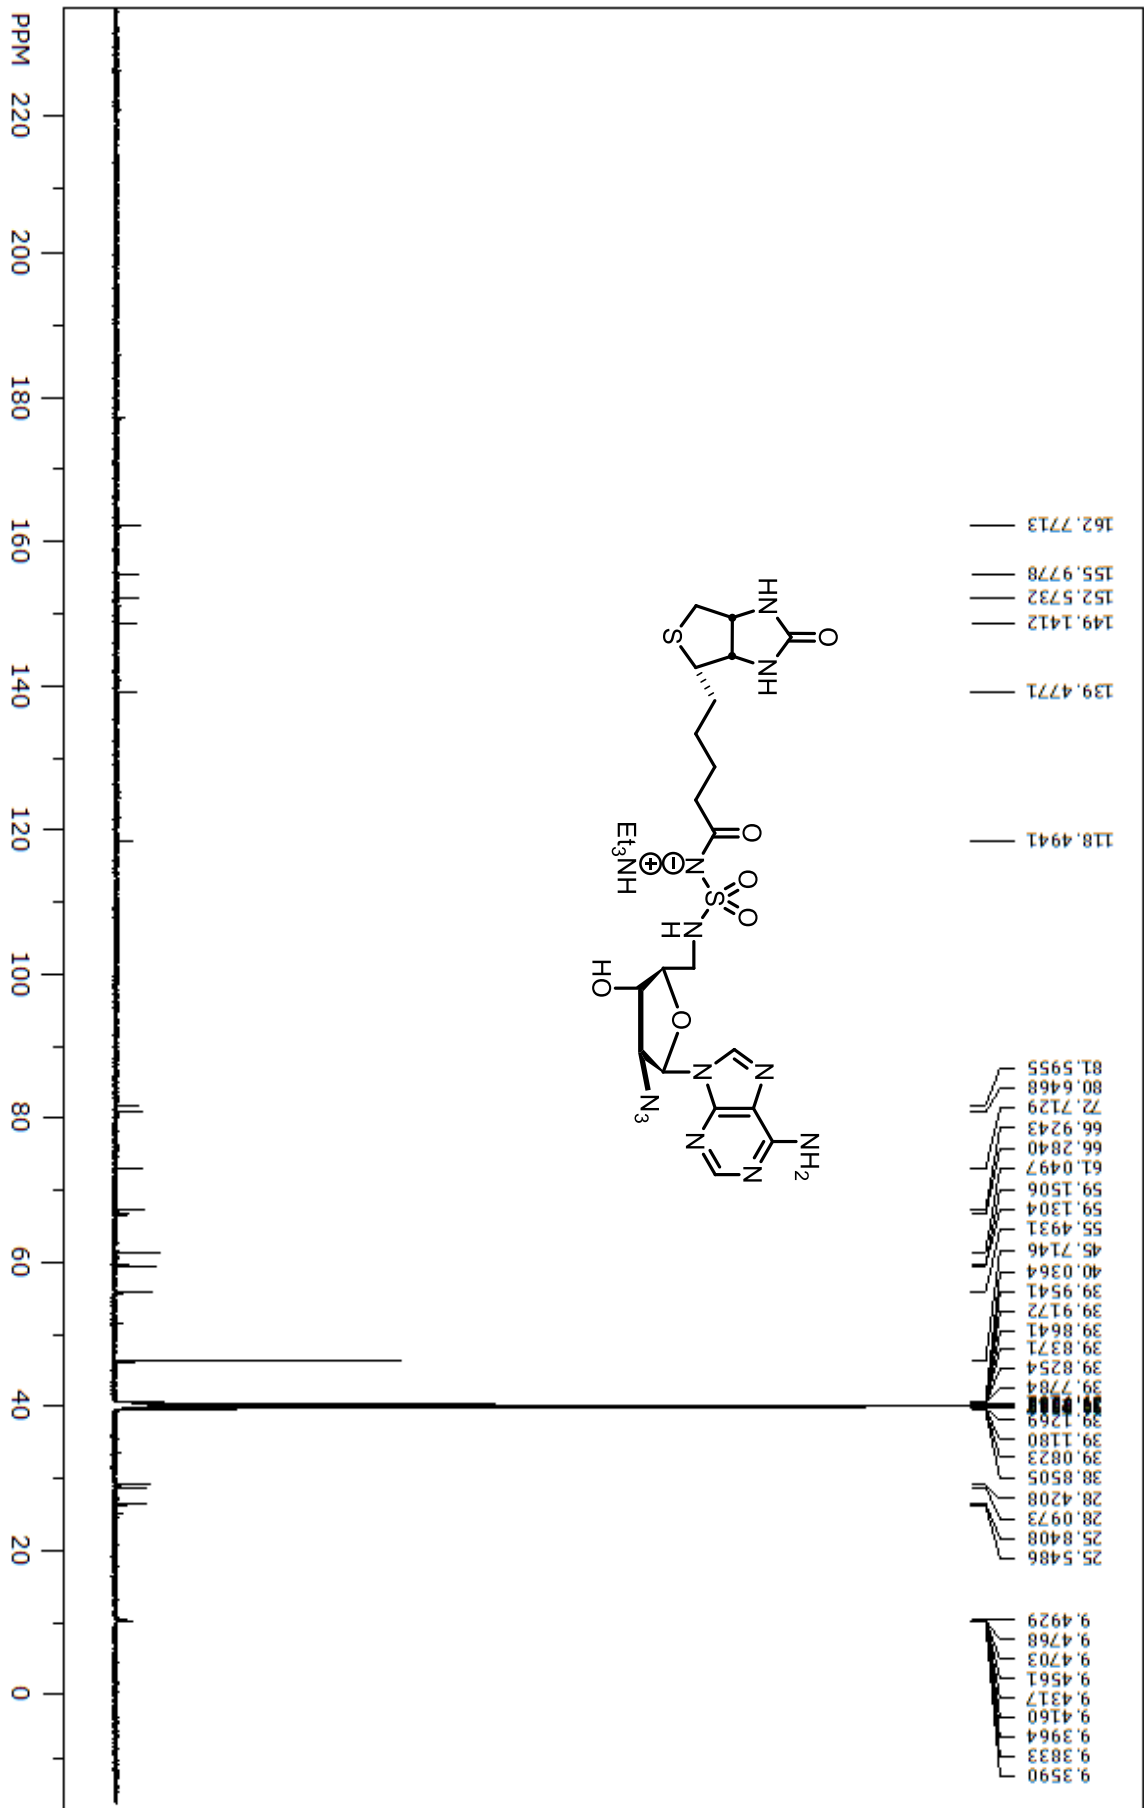

file: ...003-DEPROTECTION\_CARBON\_01.fid\fid block# 1 expt: "s2pul"  
 transmitter freq.: 150.803363 MHz  
 time domain size: 65536 points  
 width: 37878.79 Hz = 251.1800 ppm = 0.577984 Hz/pt  
 number of scans: 10000

freq. of 0 ppm: 150.786845 MHz  
 processed size: 65536 complex points  
 LB: 0.000 GF: 0.0000  
 Hz/cm: 1515.152 ppm/cm: 10.04720

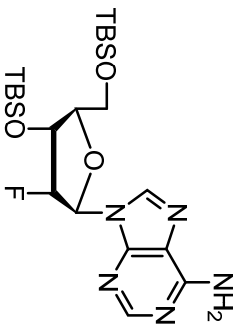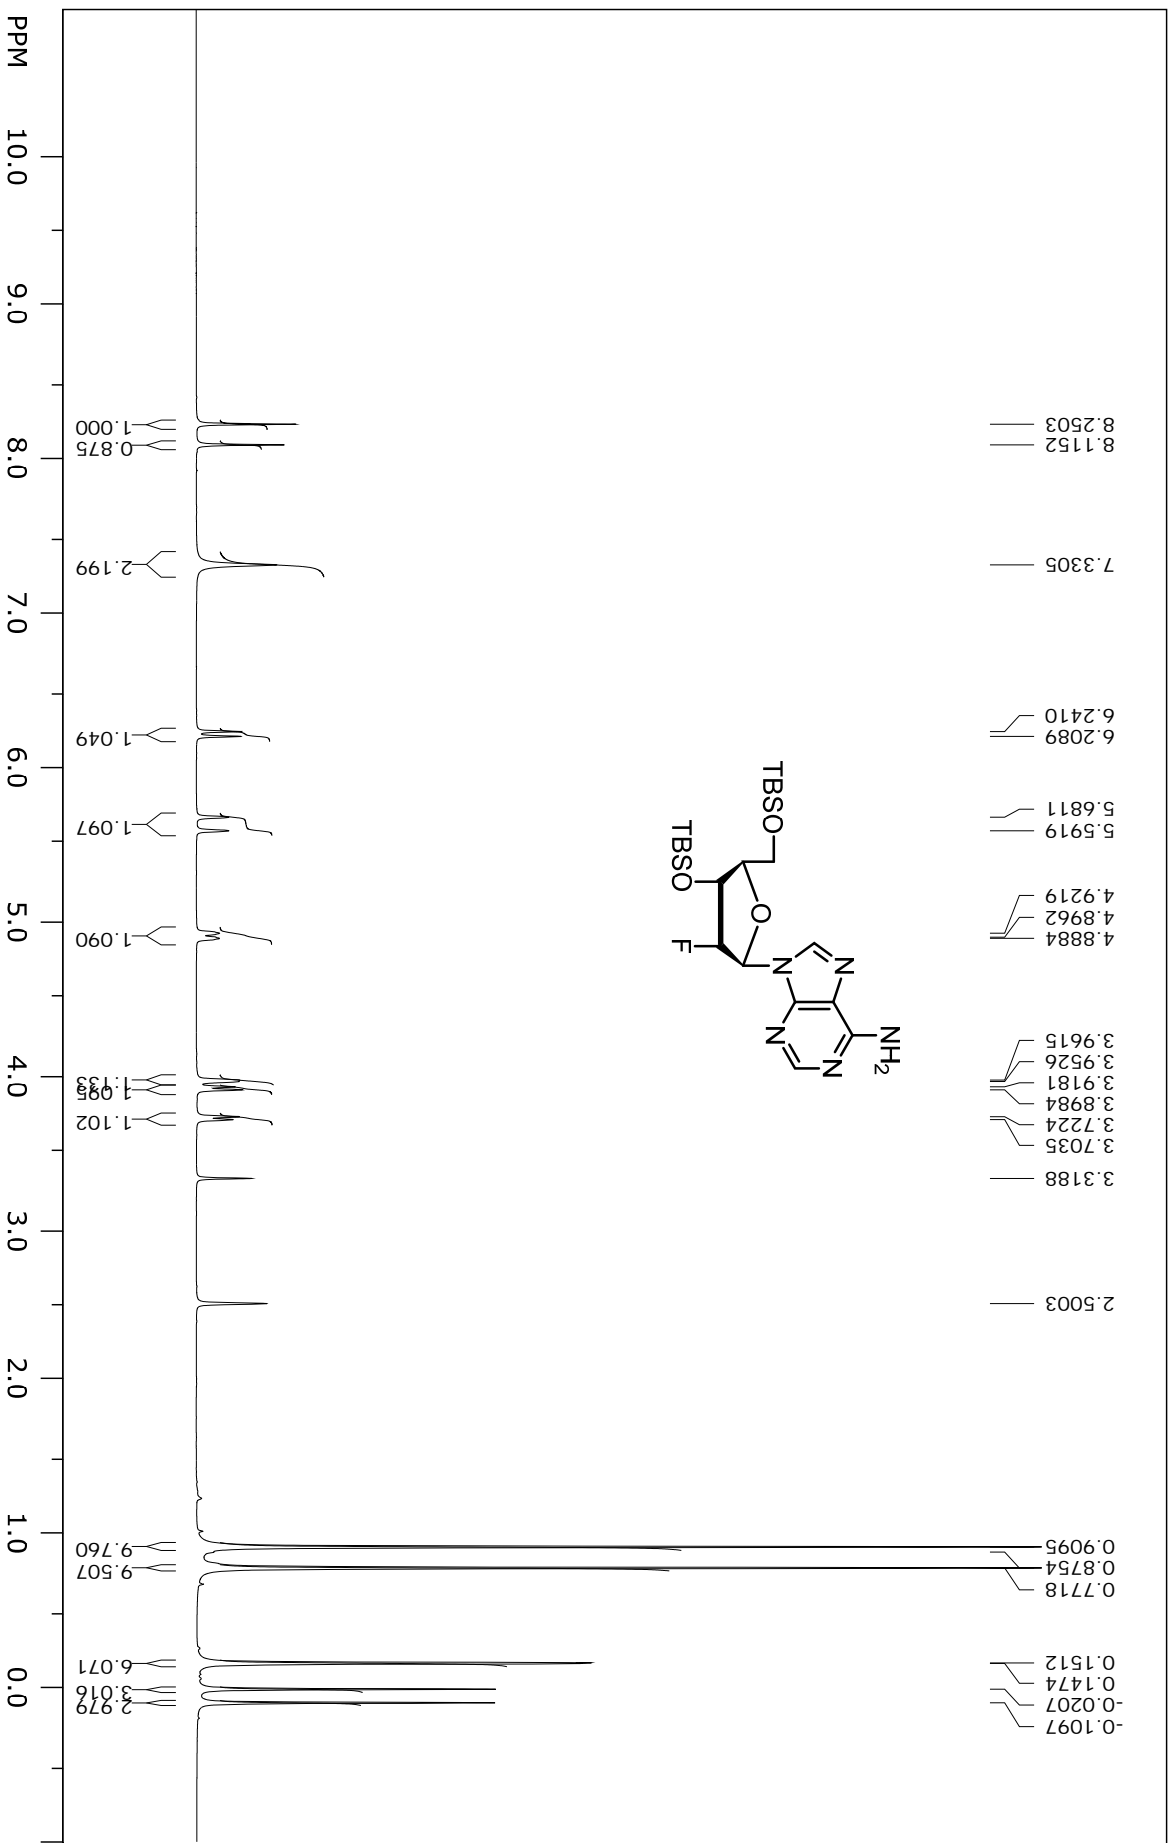

file: ...akalinda\ASK-01-013-PROTON.fid\fid block# 1 exp: "szpu1"  
 transmitter freq.: 599.678662 MHz  
 time domain size: 32768 points  
 width: 9615.38 Hz = 16.0342 ppm = 0.293438 Hz/pt  
 number of scans: 64

freq. of 0 ppm: 599.675053 MHz  
 processed size: 32768 complex points  
 LB: 0.000 GF: 0.0000  
 Hz/cm: 287.393 ppm/cm: 0.47925

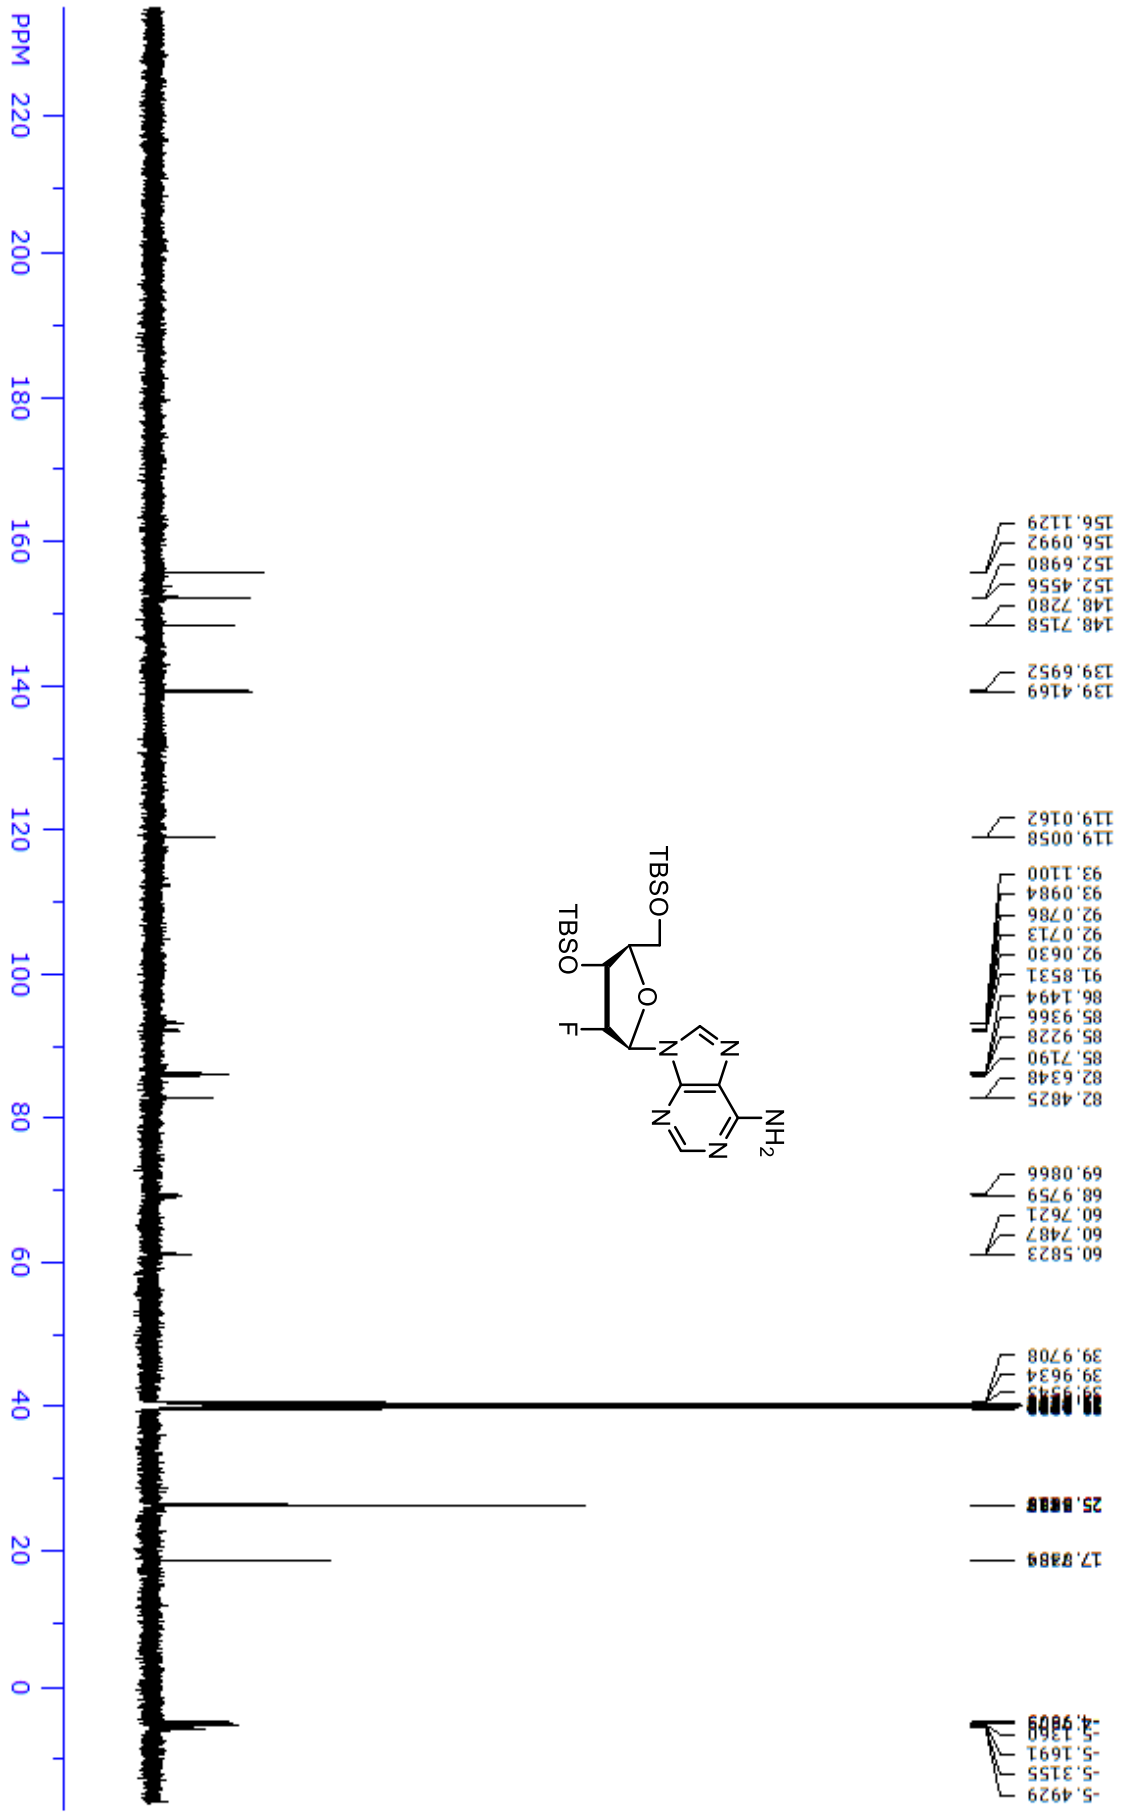

file: ...akallinda\ASK-01-013-CARBON.fid\fid\_block# 1 expt: "s2pu1"  
 transmitter freq.: 150.805002 MHz  
 time domain size: 65536 points  
 width: 37878.79 Hz = 251.1773 ppm = 0.577984 Hz/pt  
 number of scans: 2000

freq. of 0 ppm: 150.788485 MHz  
 processed size: 65536 complex points  
 LB: 0.000 GF: 0.0000  
 Hz/cm: 1515.152 ppm/cm: 10.04709

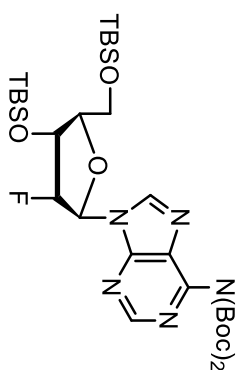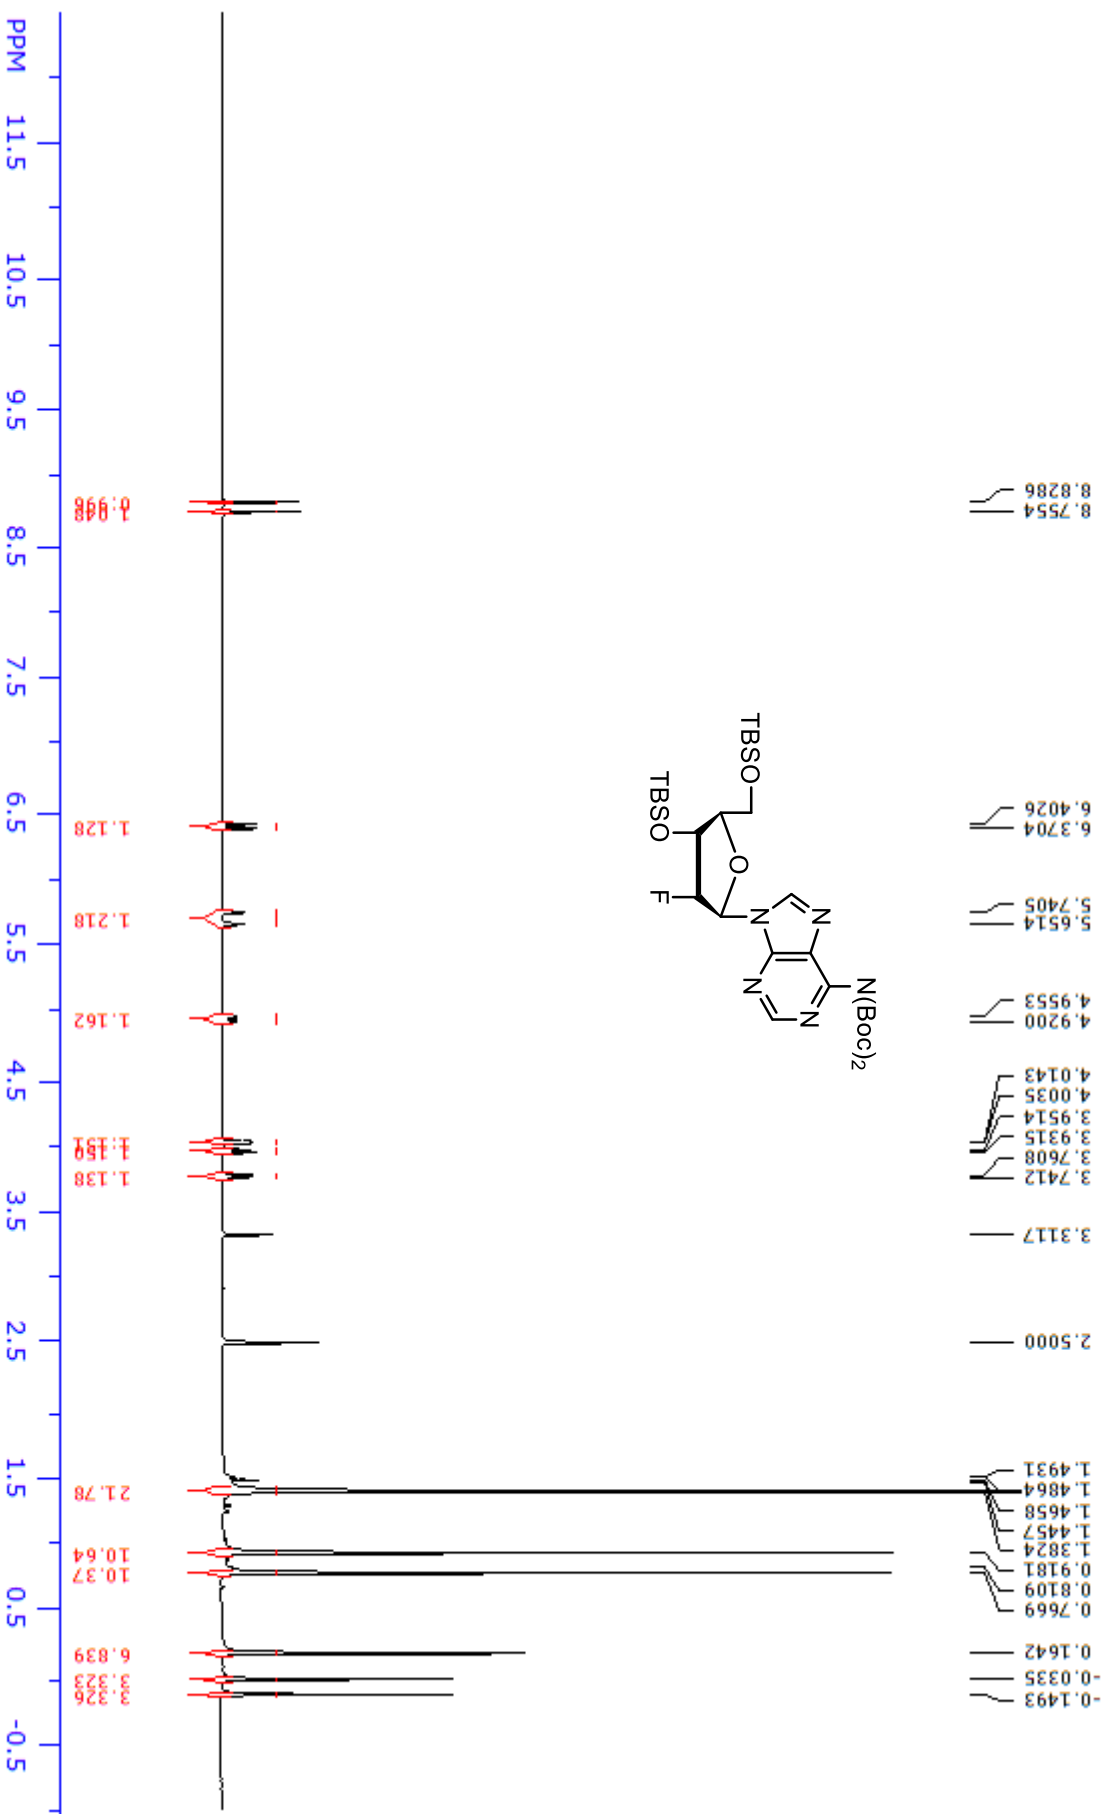

file: ...SK-01-017-PROTON\_PROTON\_01.fid\fid\_block# 1 expt: "s2pu1"  
 transmitter freq.: 599.678662 MHz  
 time domain size: 32768 points  
 width: 9615.38 Hz = 16.0342 ppm = 0.293438 Hz/pt  
 number of scans: 8

freq. of 0 ppm: 599.675054 MHz  
 processed size: 32768 complex points  
 LB: 0.000 GF: 0.0000  
 Hz/cm: 324.731 ppm/cm: 0.54151

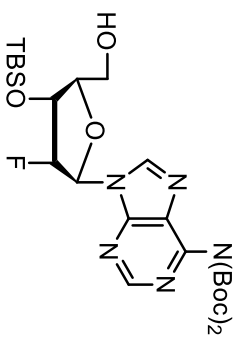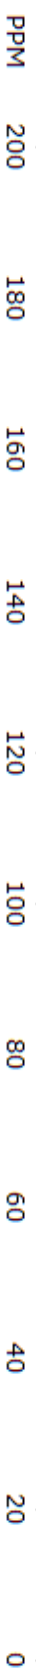

file: ... \Desktop\ASK-01-019-CARBON-2\1\fid exp: <zpgg30>  
 transmitter freq.: 100.622830 MHz  
 time domain size: 65536 points  
 width: 24038.46 Hz = 238.8967 ppm = 0.366798 Hz/pt  
 number of scans: 10000

freq. of 0 ppm: 100.612816 MHz  
 processed size: 32768 complex points  
 LB: 0.000 GF: 0.0000  
 Hz/cm: 961.538 ppm/cm: 9.55587

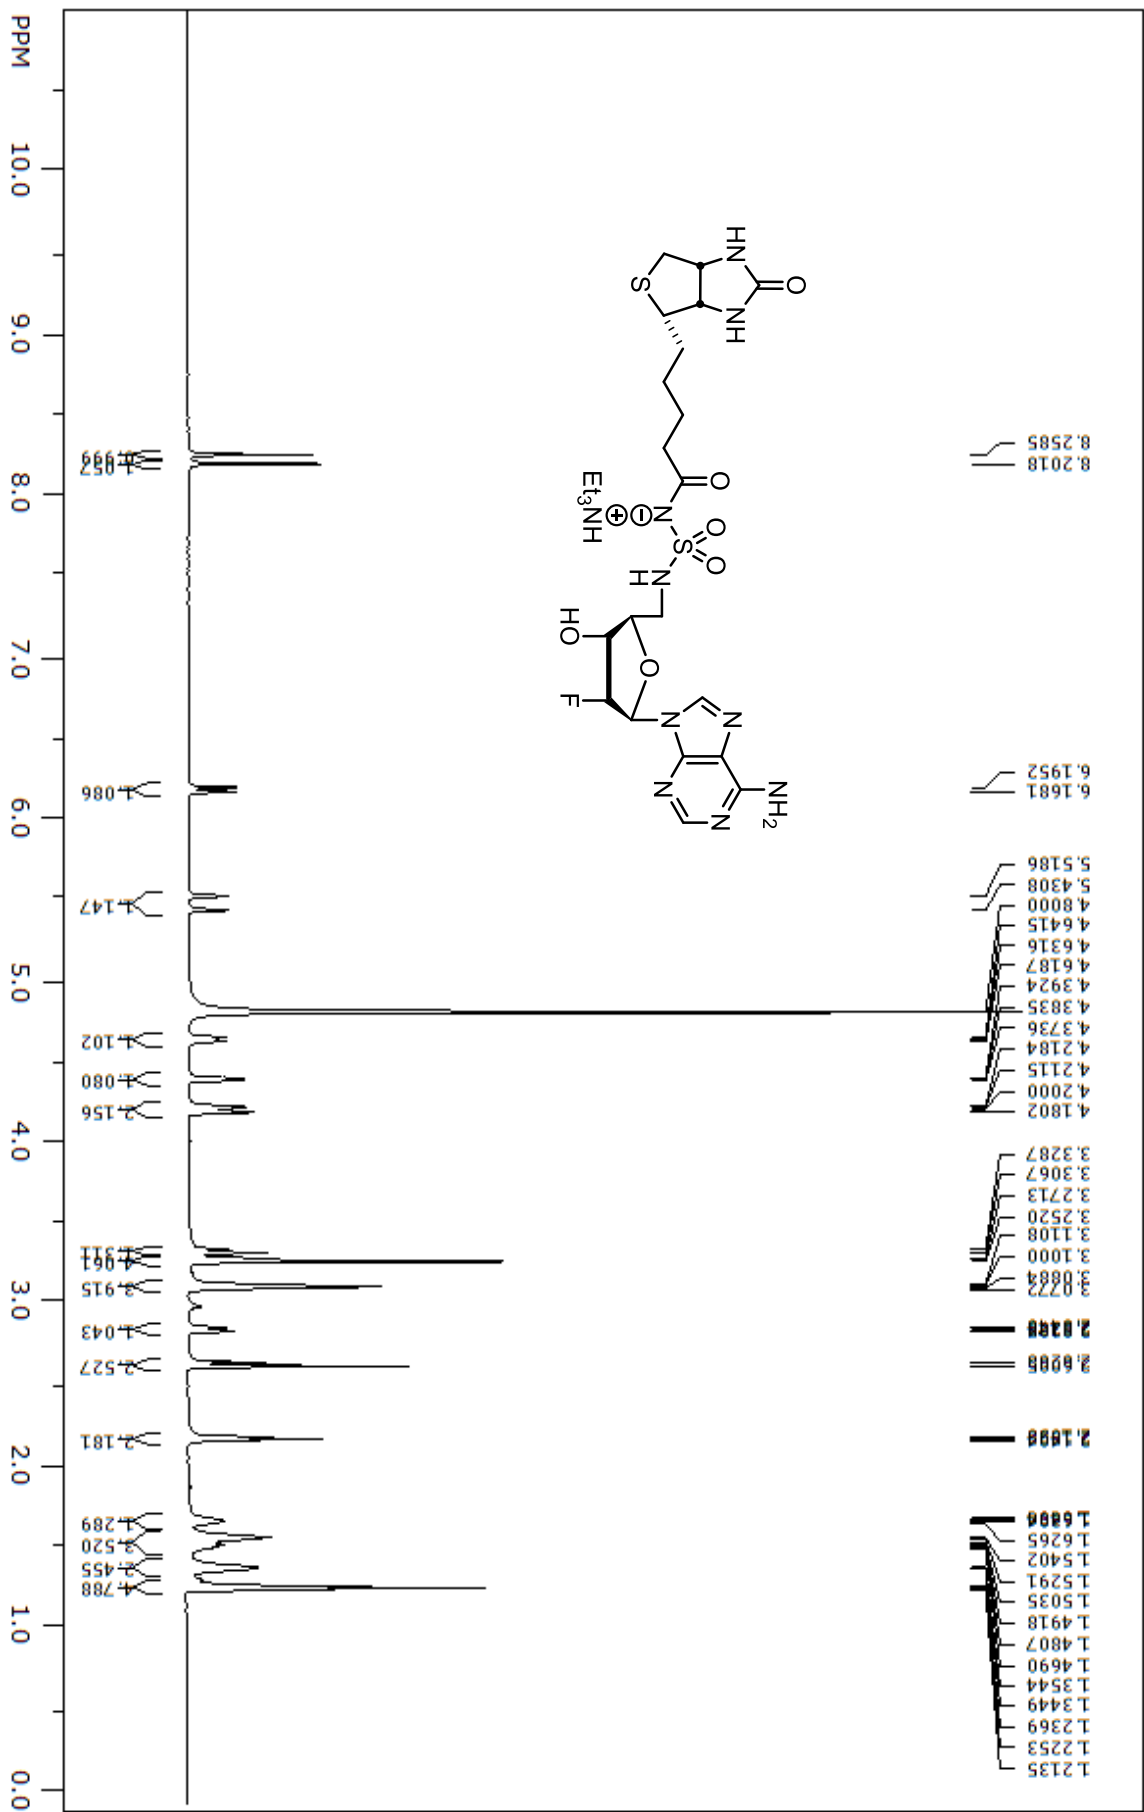

file: ...SK-01-041-PROTON\_PROTON\_01.fid\fid block# 1 expt: "szpu1"  
 transmitter freq.: 599.678176 MHz  
 time domain size: 32768 points  
 width: 9615.38 Hz = 16.0342 ppm = 0.293438 Hz/pt  
 number of scans: 128

freq. of 0 ppm: 599.674610 MHz  
 processed size: 32768 complex points  
 LB: 0.000 GF: 0.0000  
 Hz/cm: 267.094 ppm/cm: 0.44540

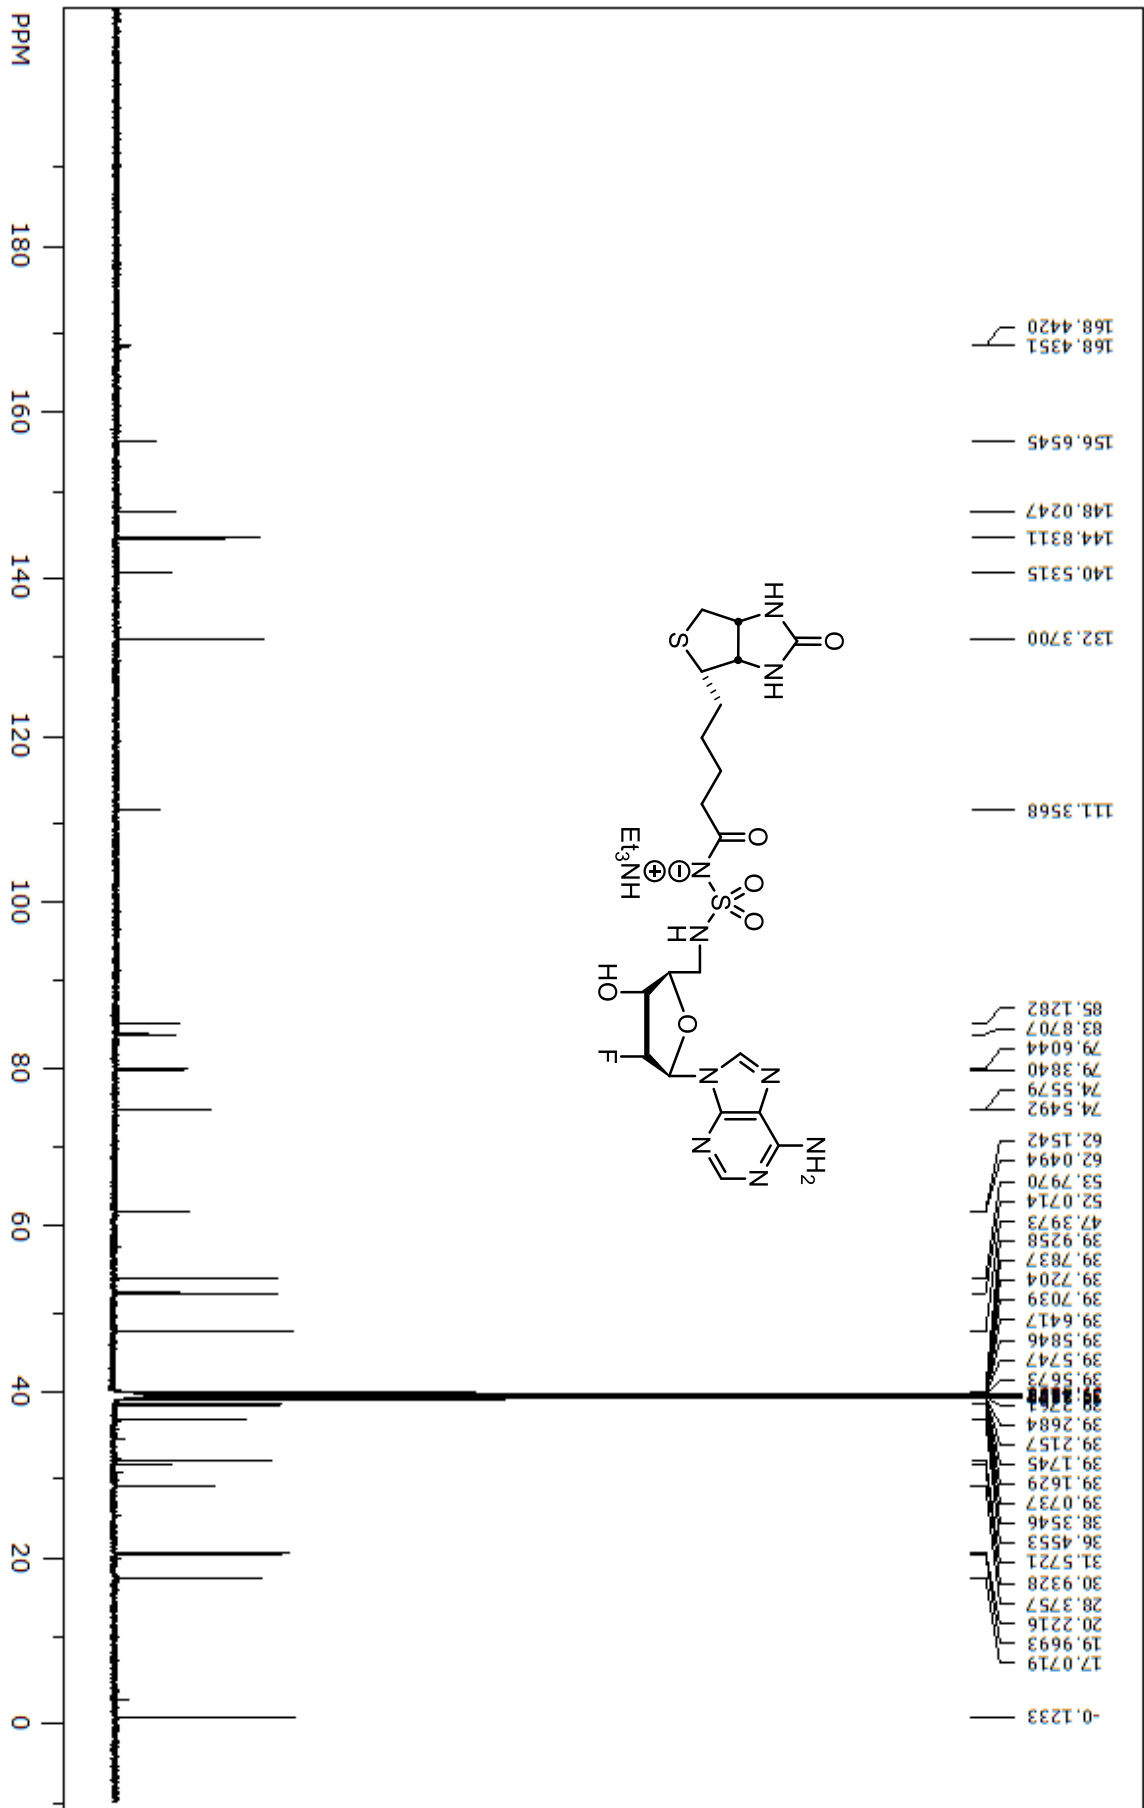

file: ...SK-01-041-CARBON\_CARBON\_01.fid\fid block# 1 expt: "s2pul"  
 transmitter freq.: 150.804879 MHz  
 time domain size: 65536 points  
 width: 37878.79 Hz = 251.1775 ppm = 0.577984 Hz/pt  
 number of scans: 20000

freq. of 0 ppm: 150.789509 MHz  
 processed size: 65536 complex points  
 LB: 0.000 GF: 0.0000  
 Hz/cm: 1329.966 ppm/cm: 8.81912

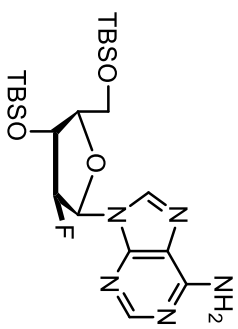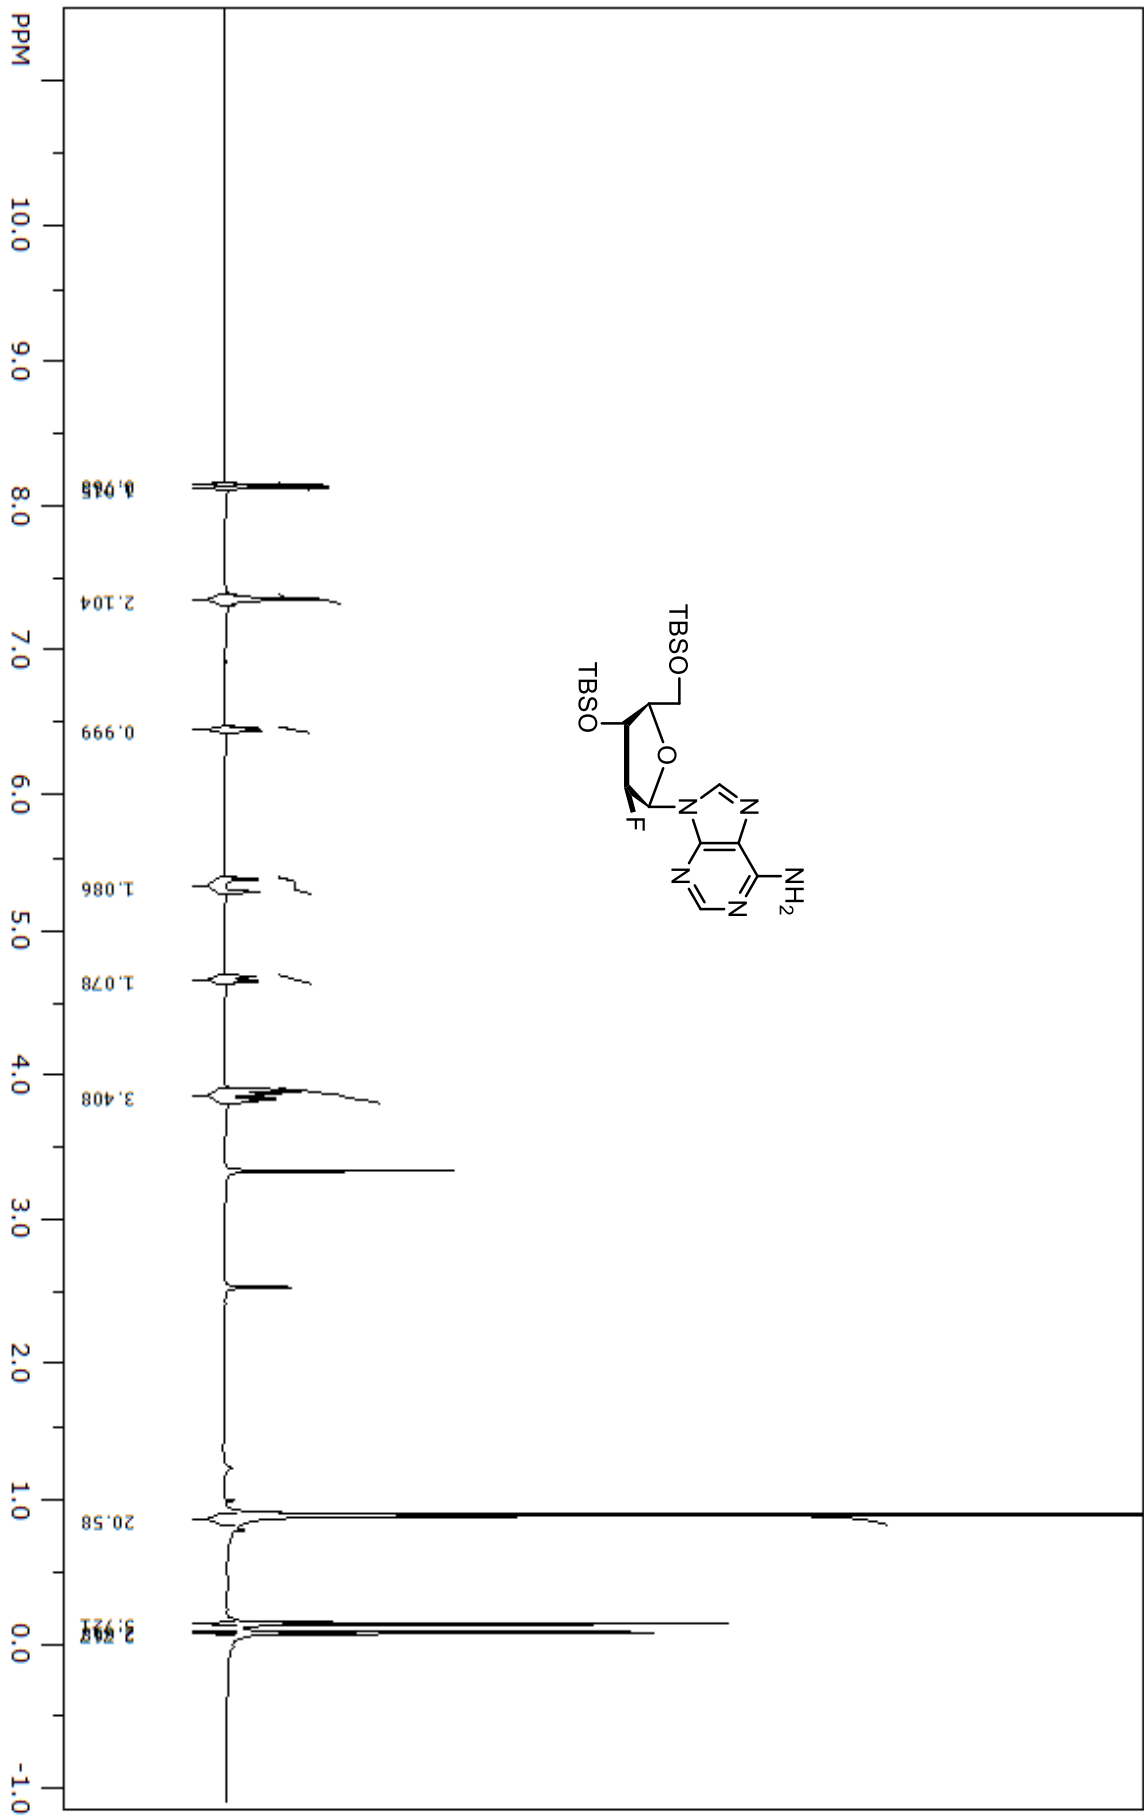

file: ...SK-01-037-PROTON\_PROTON\_01.fid(fid block# 1 expt: "szpu")  
 transmitter freq.: 599.672148 MHz  
 time domain size: 32768 points  
 width: 9615.38 Hz = 16.0344 ppm = 0.293438 Hz/pt  
 number of scans: 800

freq. of 0 ppm: 599.668531 MHz  
 processed size: 32768 complex points  
 LB: 0.000 GF: 0.0000  
 Hz/cm: 303.741 ppm/cm: 0.50651



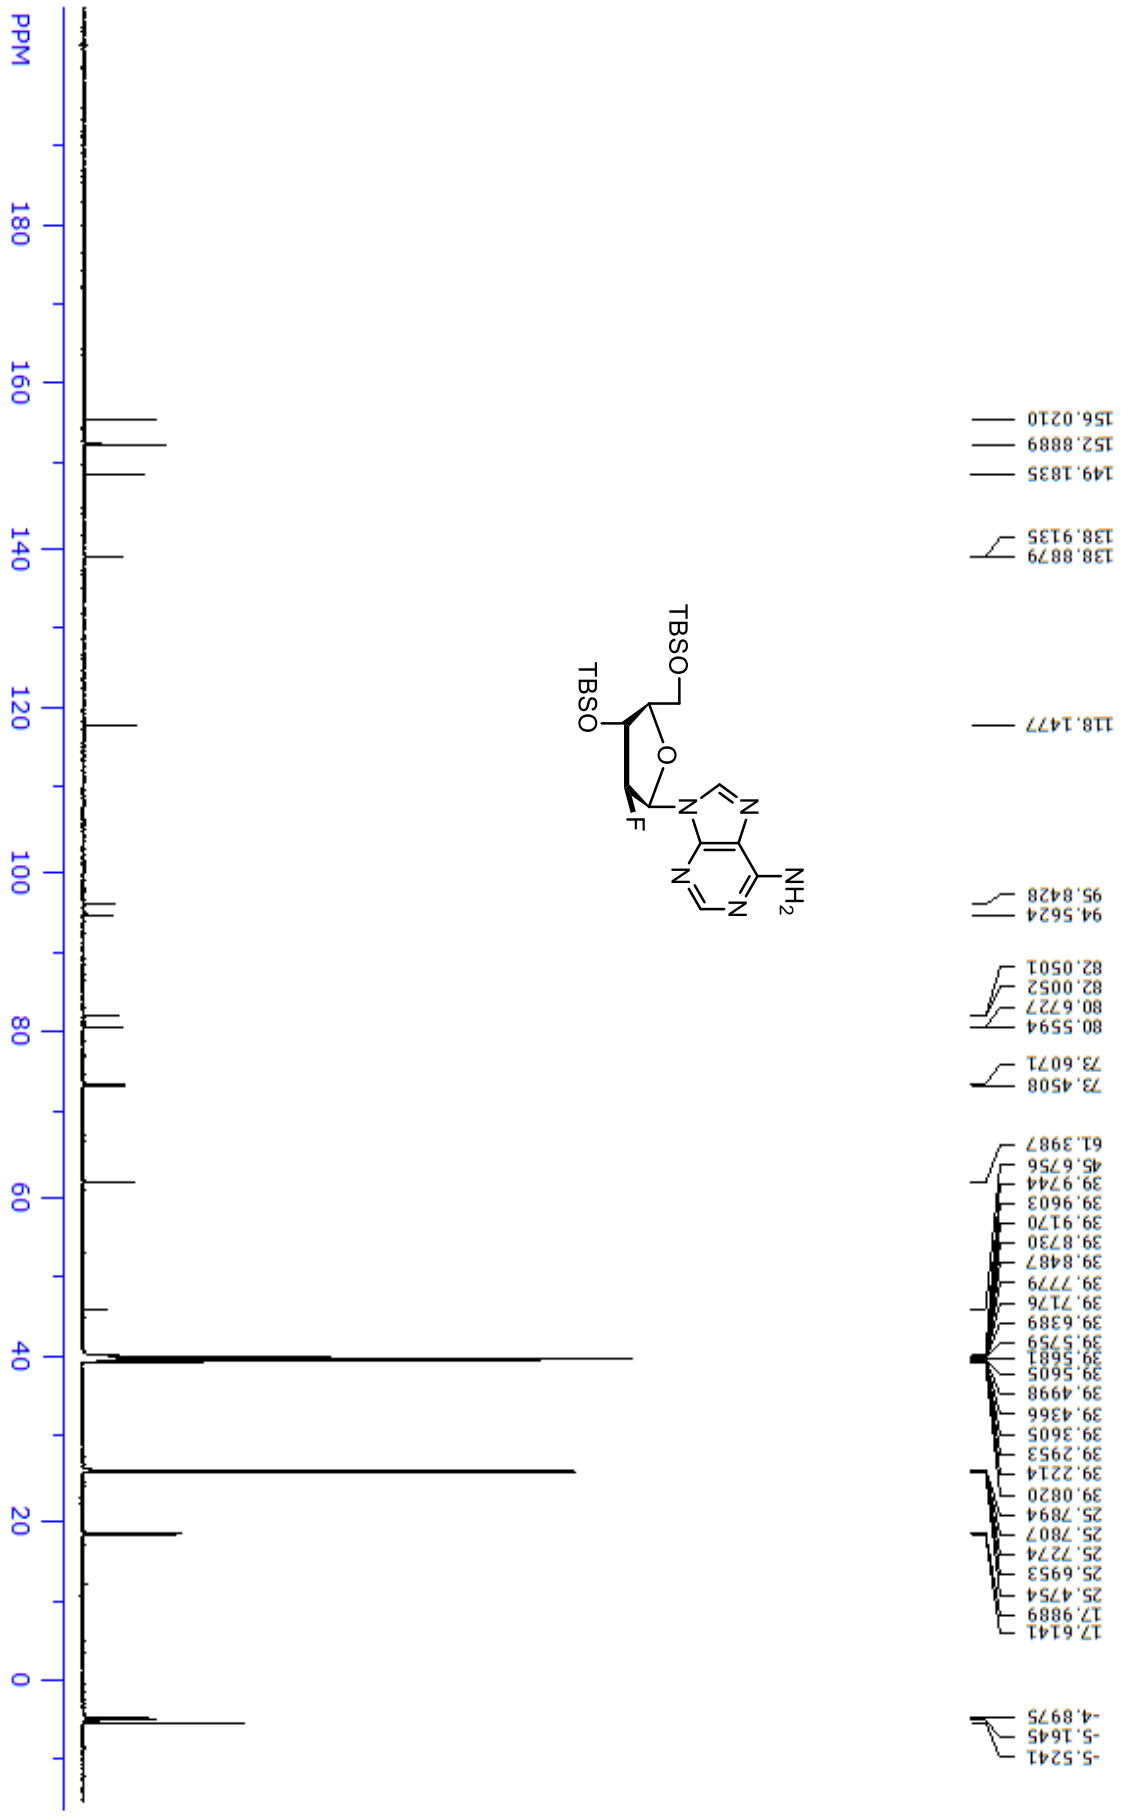

file: ...SK-01-037-CARBON\_CARBON\_01.fid\fid block# 1 expt: "s2pul"  
 transmitter freq.: 150.803363 MHz  
 time domain size: 65536 points  
 width: 37878.79 Hz = 251.1800 ppm = 0.577984 Hz/pt  
 number of scans: 1700

freq. of 0 ppm: 150.786846 MHz  
 processed size: 65536 complex points  
 LB: 0.000 GF: 0.0000  
 Hz/cm: 1341.262 ppm/cm: 8.89411

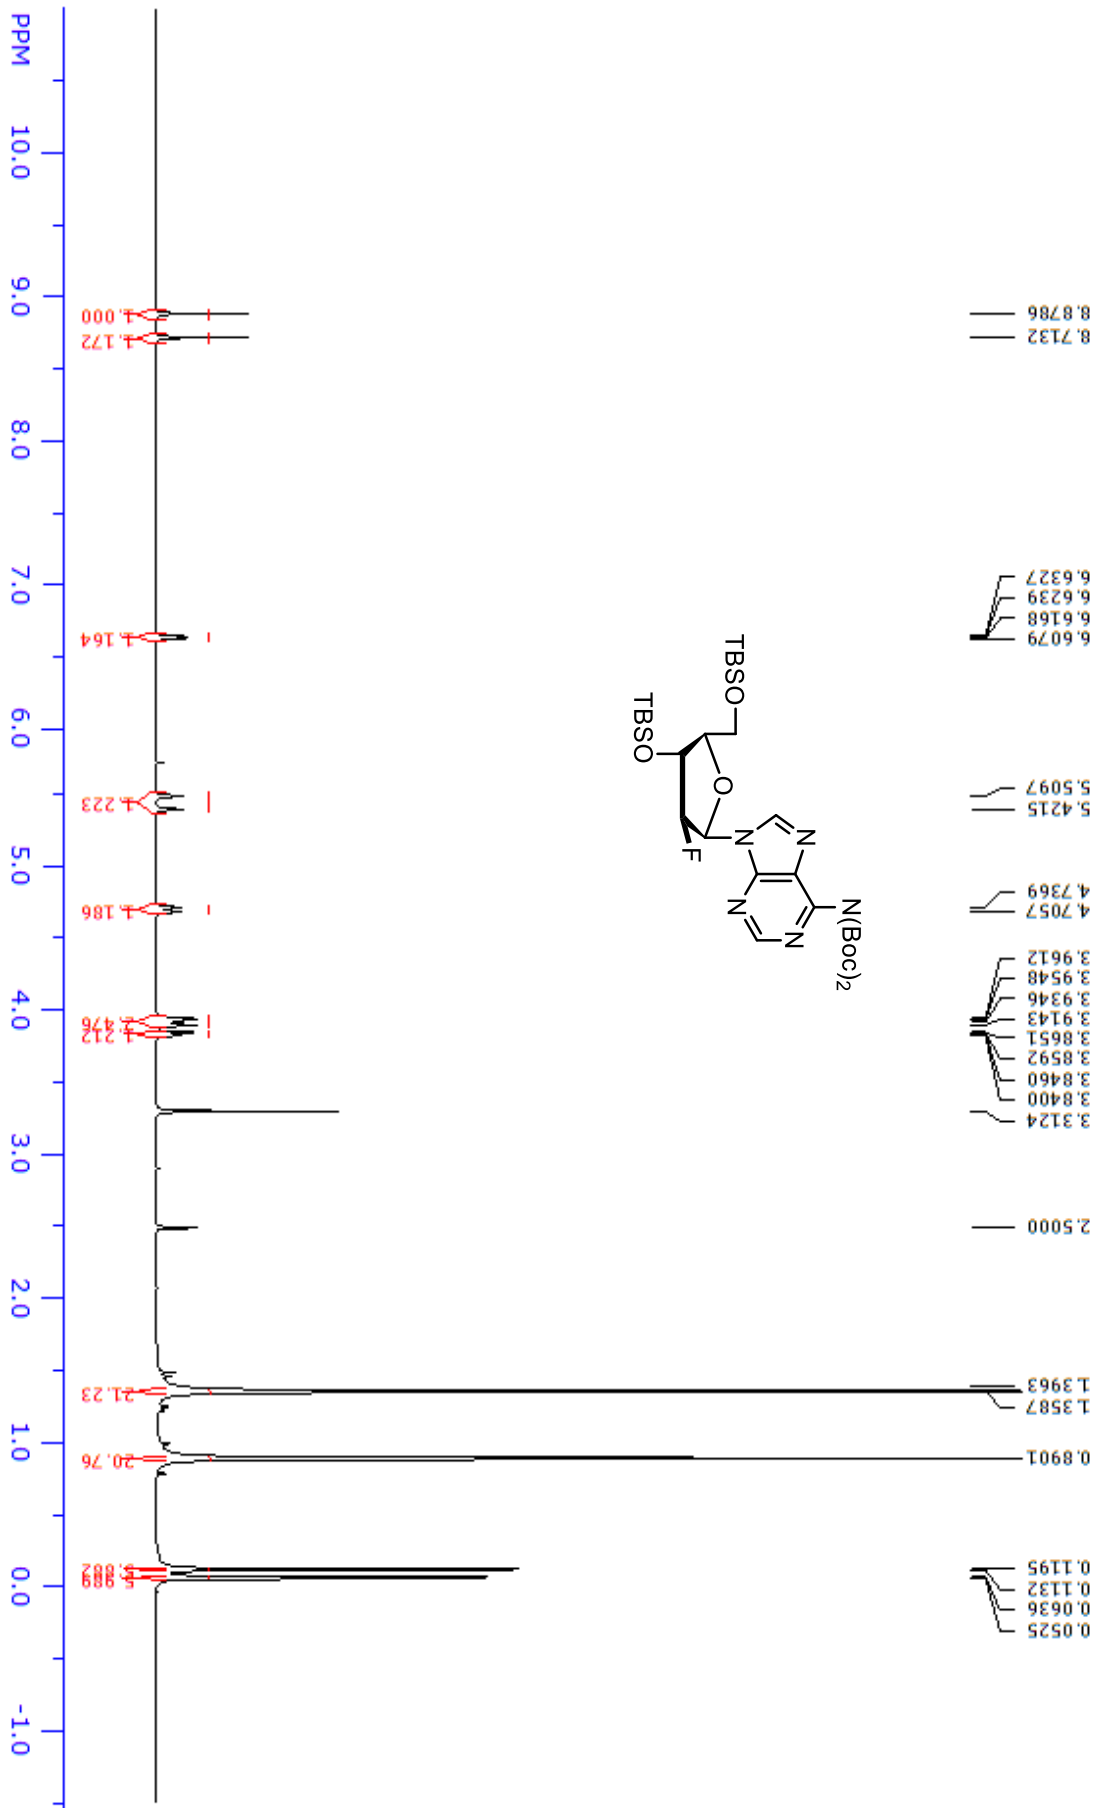

file: ...SK-01-039-PROTON\_PROTON\_01.fid(fid block# 1 expt: "szpu")  
 transmitter freq.: 599.672148 MHz  
 time domain size: 32768 points  
 width: 9615.38 Hz = 16.0344 ppm = 0.293438 Hz/pt  
 number of scans: 512

freq. of 0 ppm: 599.668532 MHz  
 processed size: 32768 complex points  
 LB: 0.000 GF: 0.0000  
 Hz/cm: 300.346 ppm/cm: 0.50085

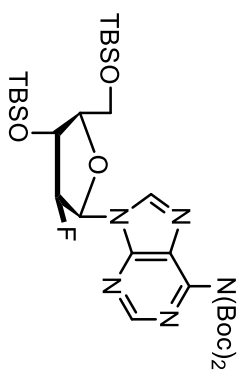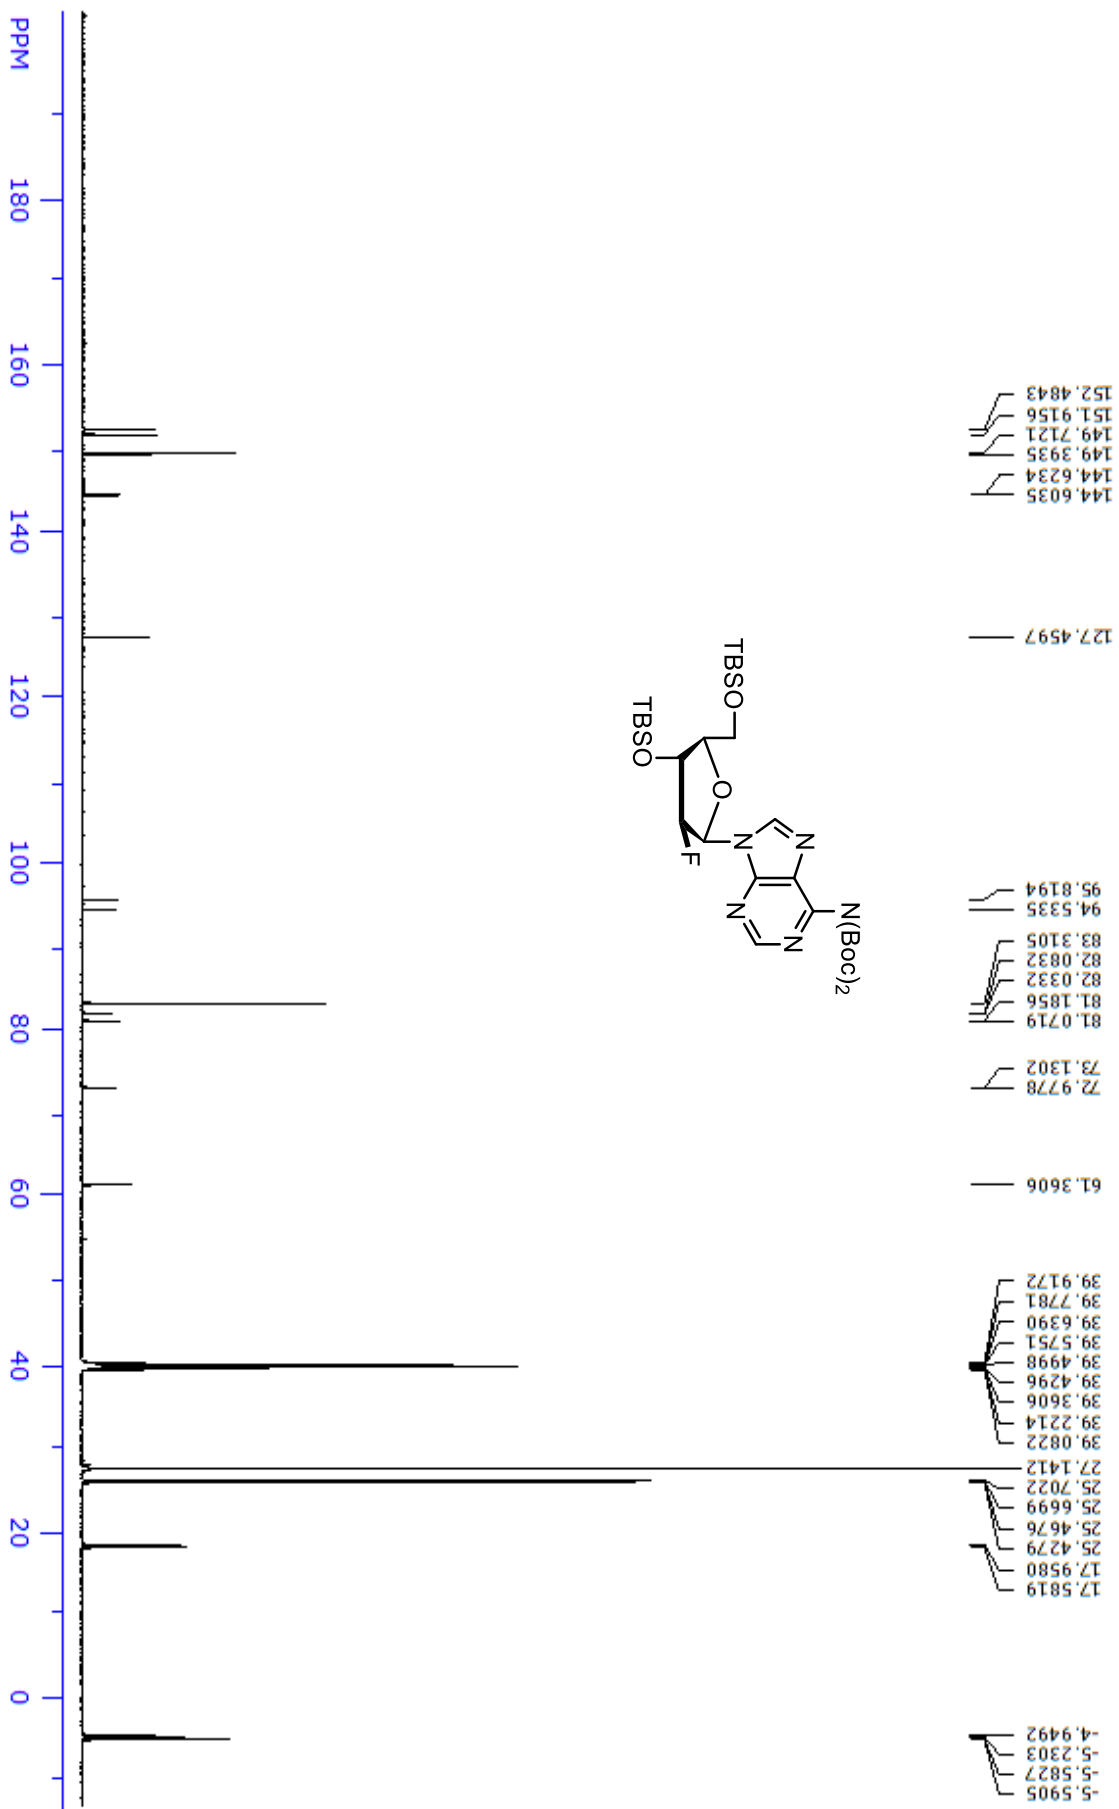

file: ...SK-01-039-CARBON\_CARBON\_01.fid\fid block# 1 expt: "s2pul"  
 transmitter freq.: 150.803363 MHz  
 time domain size: 65536 points  
 width: 37878.79 Hz = 251.1800 ppm = 0.577984 Hz/pt  
 number of scans: 1800

freq. of 0 ppm: 150.786848 MHz  
 processed size: 65536 complex points  
 LB: 0.000 GF: 0.0000  
 Hz/cm: 1305.997 ppm/cm: 8.66027

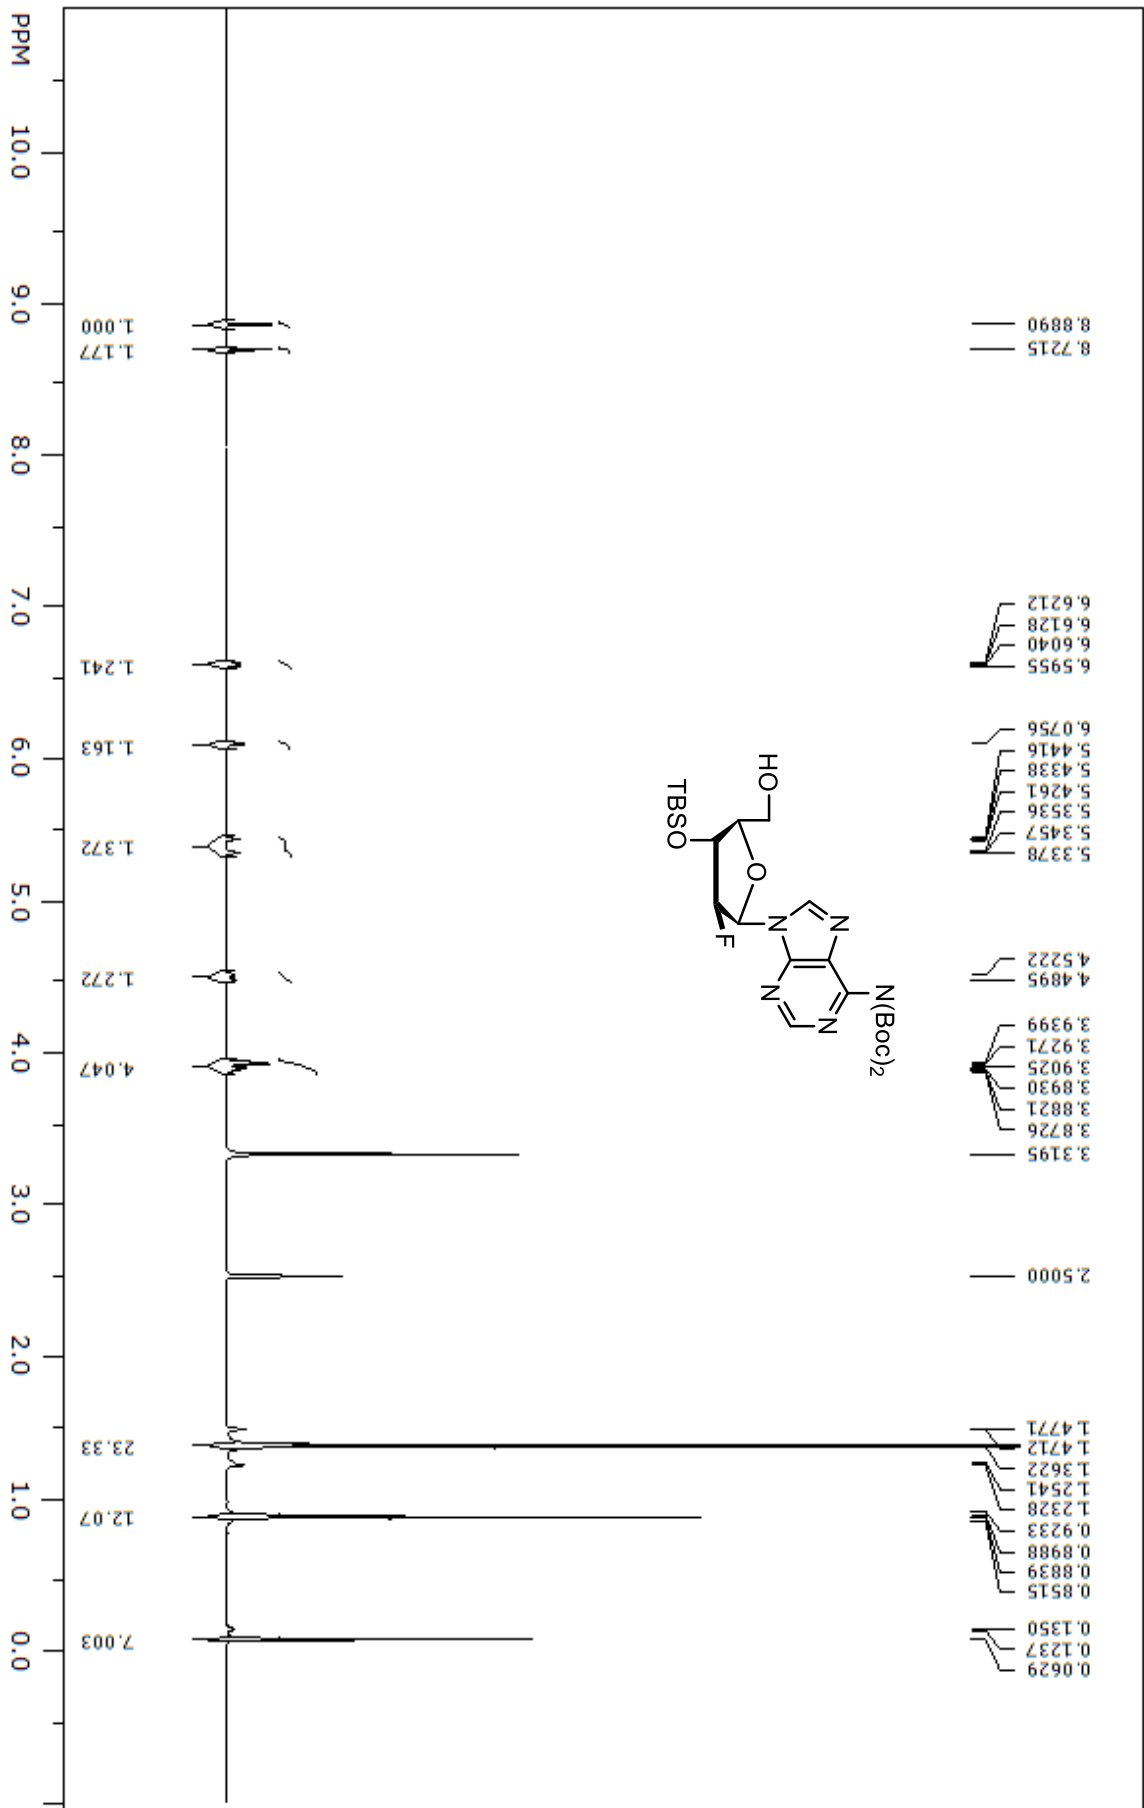

file: ...SK-01-043-PROTON\_PROTON\_01.fid(fid block# 1 expt: "szpu")  
 transmitter freq.: 599.65633 MHz  
 time domain size: 32768 points  
 width: 9615.38 Hz = 16.0346 ppm = 0.293438 Hz/pt  
 number of scans: 1024

freq. of 0 ppm: 599.652024 MHz  
 processed size: 32768 complex points  
 LB: 0.000 GF: 0.0000  
 Hz/cm: 288.925 ppm/cm: 0.48181

SpinWorks 3 : ASK-01 -043- CARBON

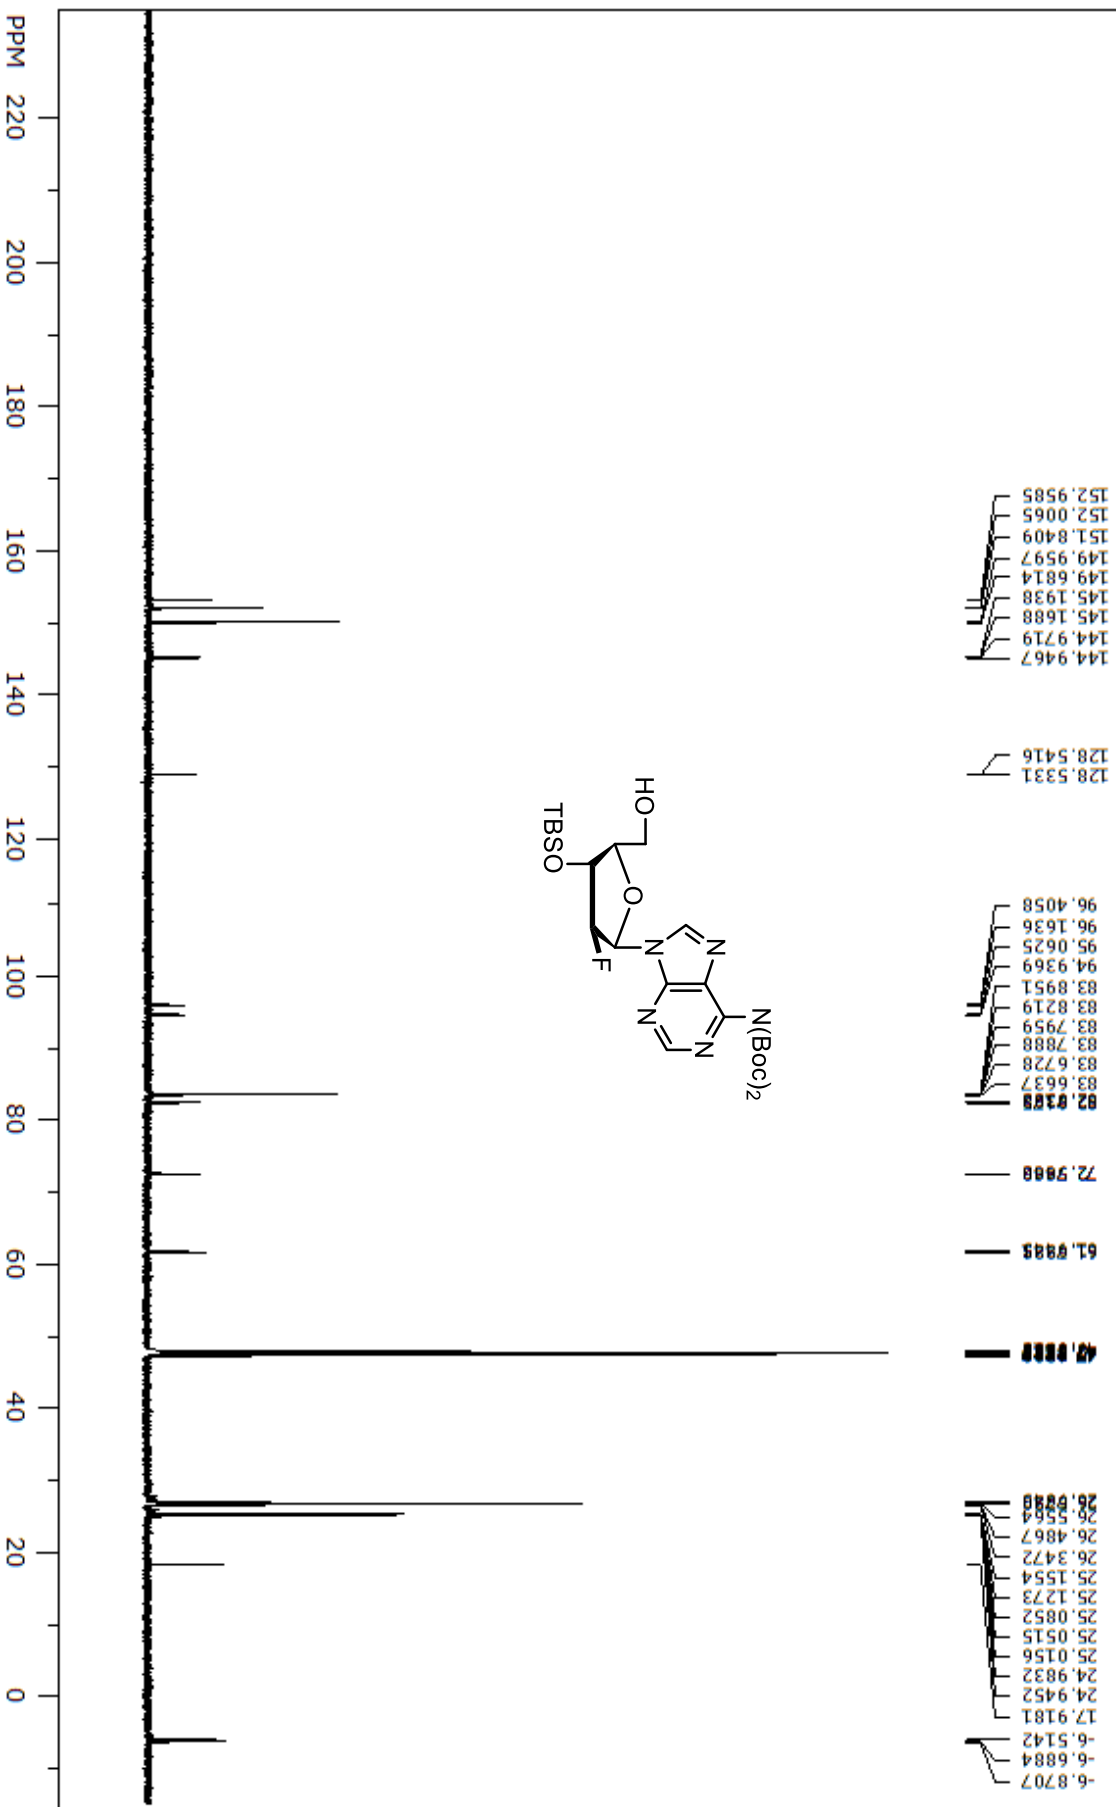

file: ...SK-01-043-CARBON\_CARBON\_01.fid\fid block# 1 expt: "s2pul"  
 transmitter freq.: 150.804879 MHz  
 time domain size: 65536 points  
 width: 37878.79 Hz = 251.1775 ppm = 0.577984 Hz/pt  
 number of scans: 2000

freq. of 0 ppm: 150.788293 MHz  
 processed size: 65536 complex points  
 LB: 0.000 GF: 0.0000  
 Hz/cm: 1515.152 ppm/cm: 10.04710

SpinWorks 3:

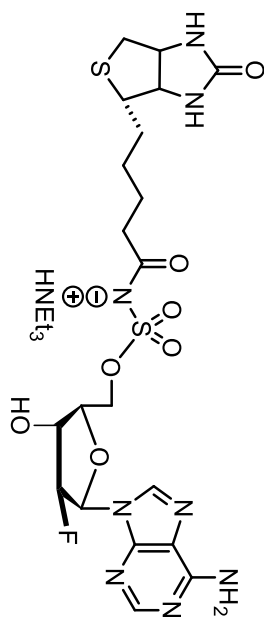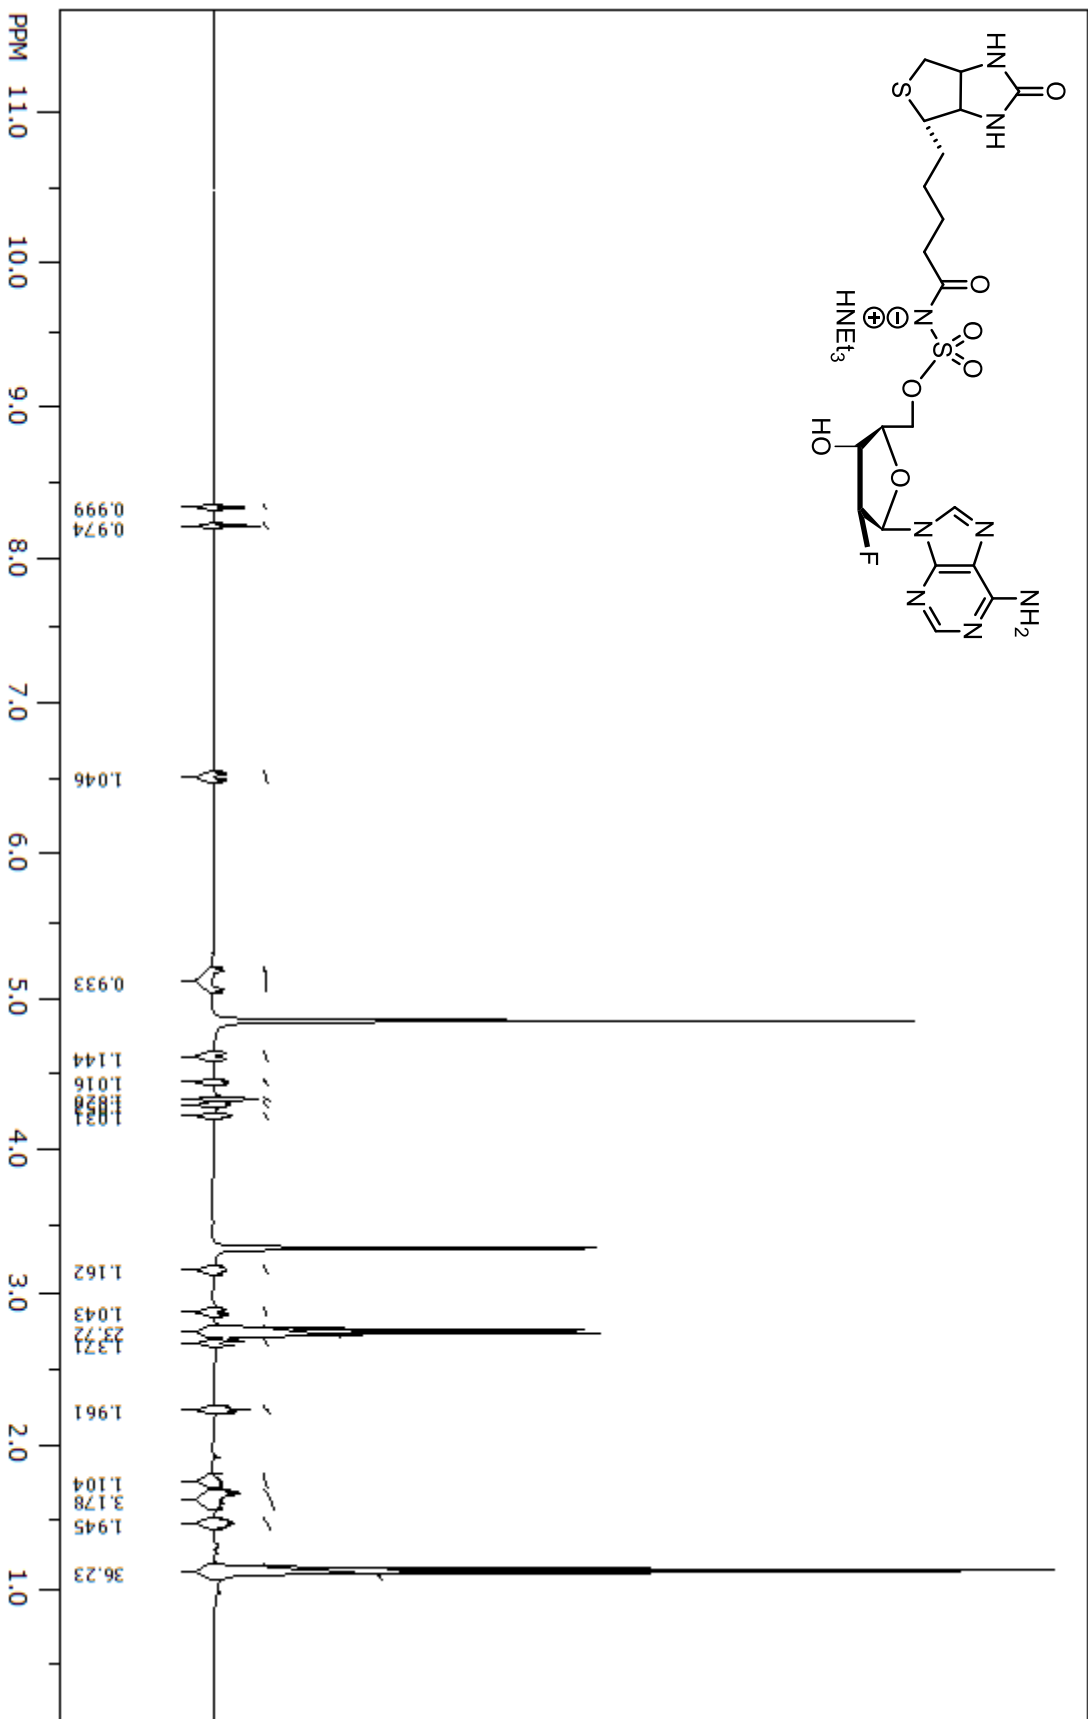

file: ...SK-02-029-MEOD\_20140211\_01.fid\fid block# 1 exp#: "szpul"  
 transmitter freq.: 399.744193 MHz  
 time domain size: 32768 points  
 width: 6410.26 Hz = 16.0359 ppm = 0.195626 Hz/pt  
 number of scans: 64

freq. of 0 ppm: 399.741792 MHz  
 processed size: 32768 complex points  
 LB: 0.000 GF: 0.0000  
 Hz/cm: 185.620 ppm/cm: 0.46435

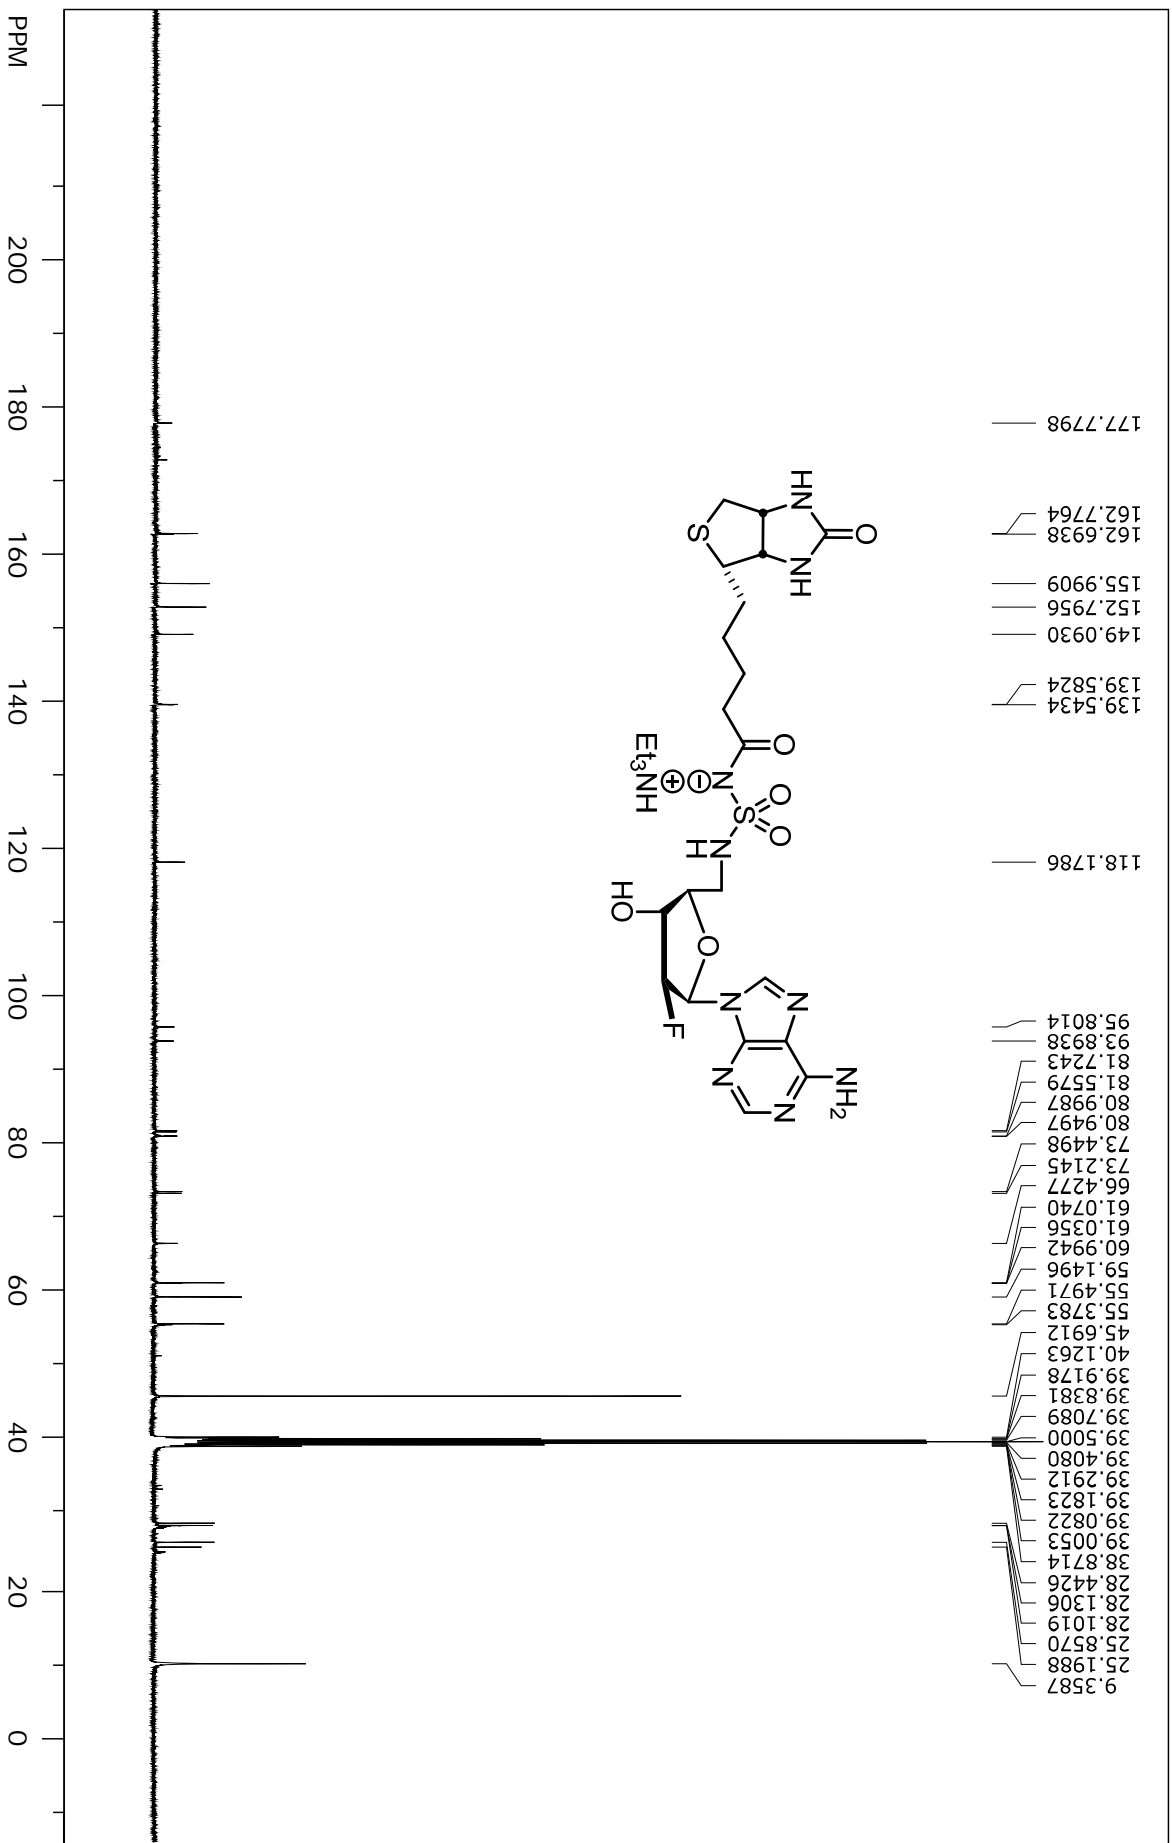

file: ...-ANALOG-CARBON\_20131023\_01.fid\fid block# 1 expt: "S2pu1"  
 transmitter freq.: 100.527931 MHz  
 time domain size: 65536 points  
 width: 25000.00 Hz = 248.6871 ppm = 0.381470 Hz/pt  
 number of scans: 10000

freq. of 0 ppm: 100.516918 MHz  
 processed size: 65536 complex points  
 LB: 0.000 GF: 0.0000  
 Hz/cm: 1000.000 ppm/cm: 9.94748

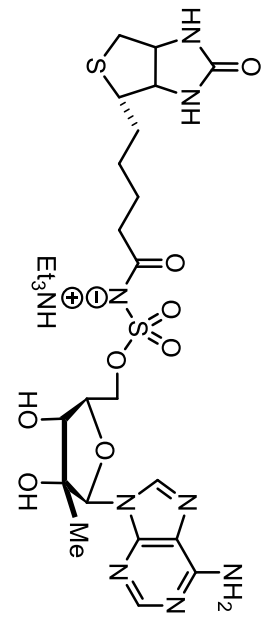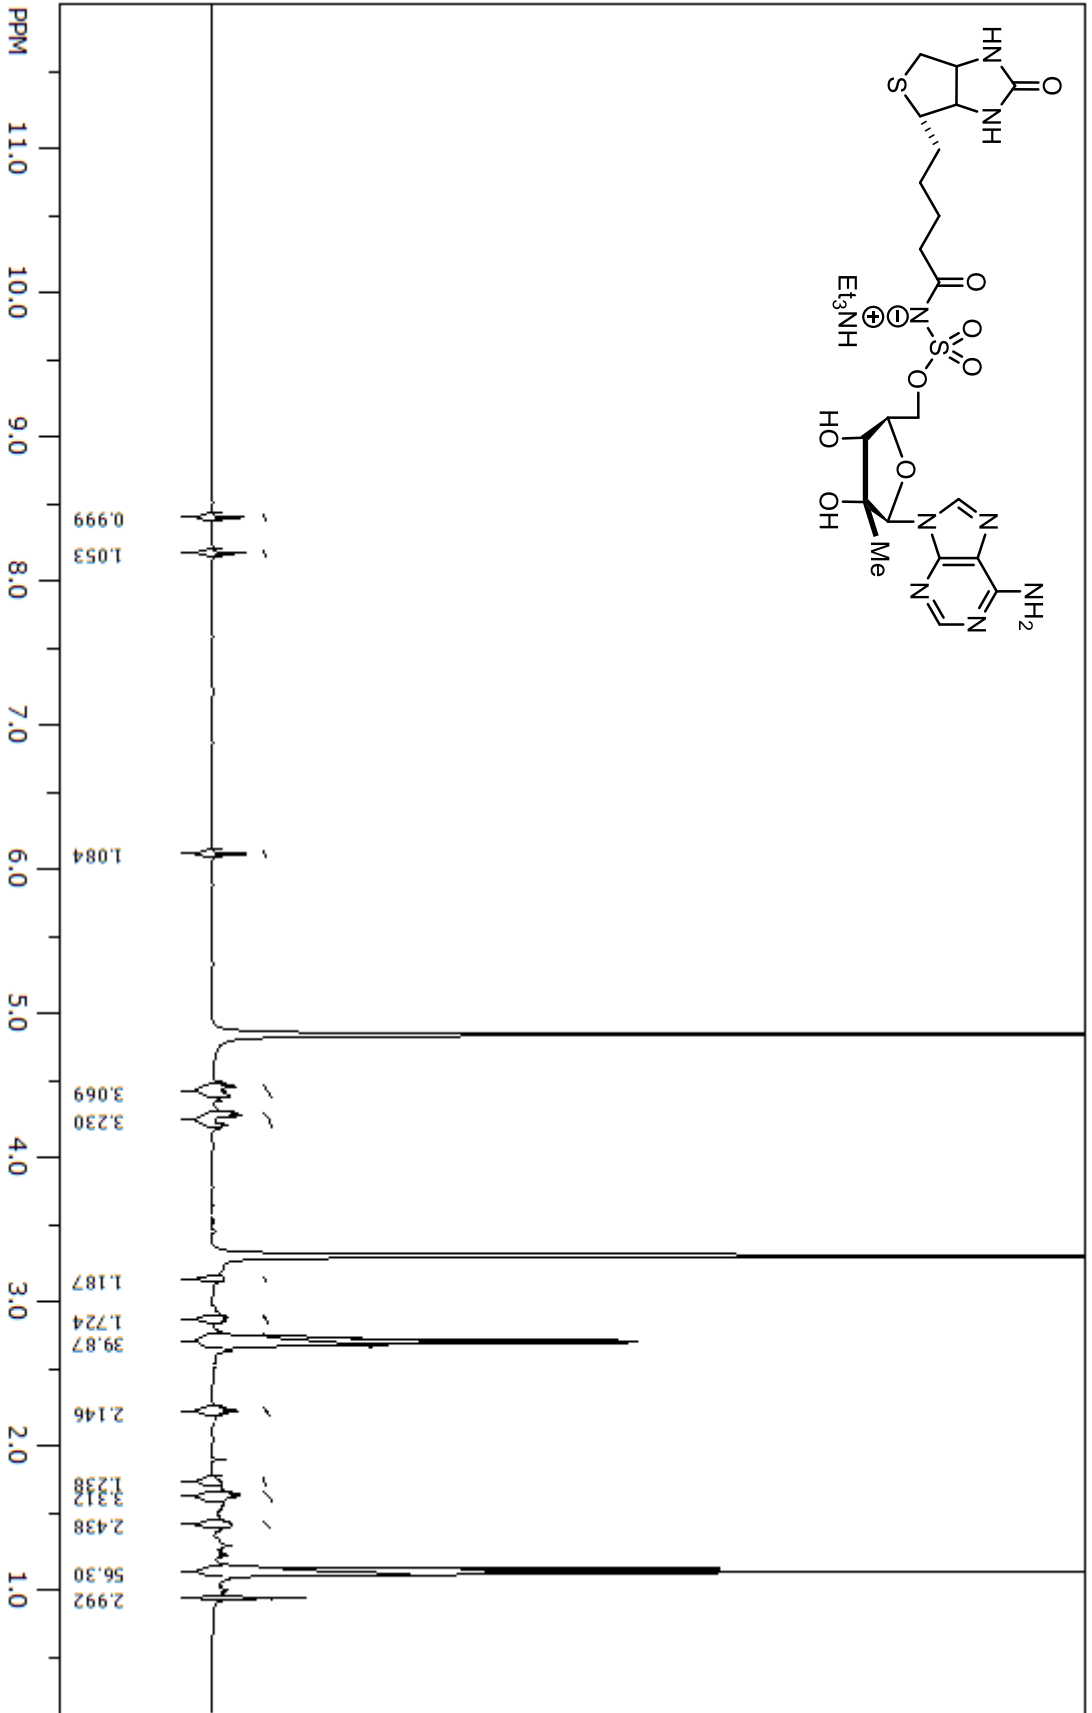

file: ...K-03-133A-MEOD\_20140211\_01.fid\fid block# 1 exp: "szpul"  
 transmitter freq.: 399.744193 MHz  
 time domain size: 32768 points  
 width: 6410.26 Hz = 16.0359 ppm = 0.195626 Hz/pt  
 number of scans: 64

freq. of 0 ppm: 399.741794 MHz  
 processed size: 32768 complex points  
 LB: 0.000 GF: 0.0000  
 Hz/cm: 190.353 ppm/cm: 0.47619



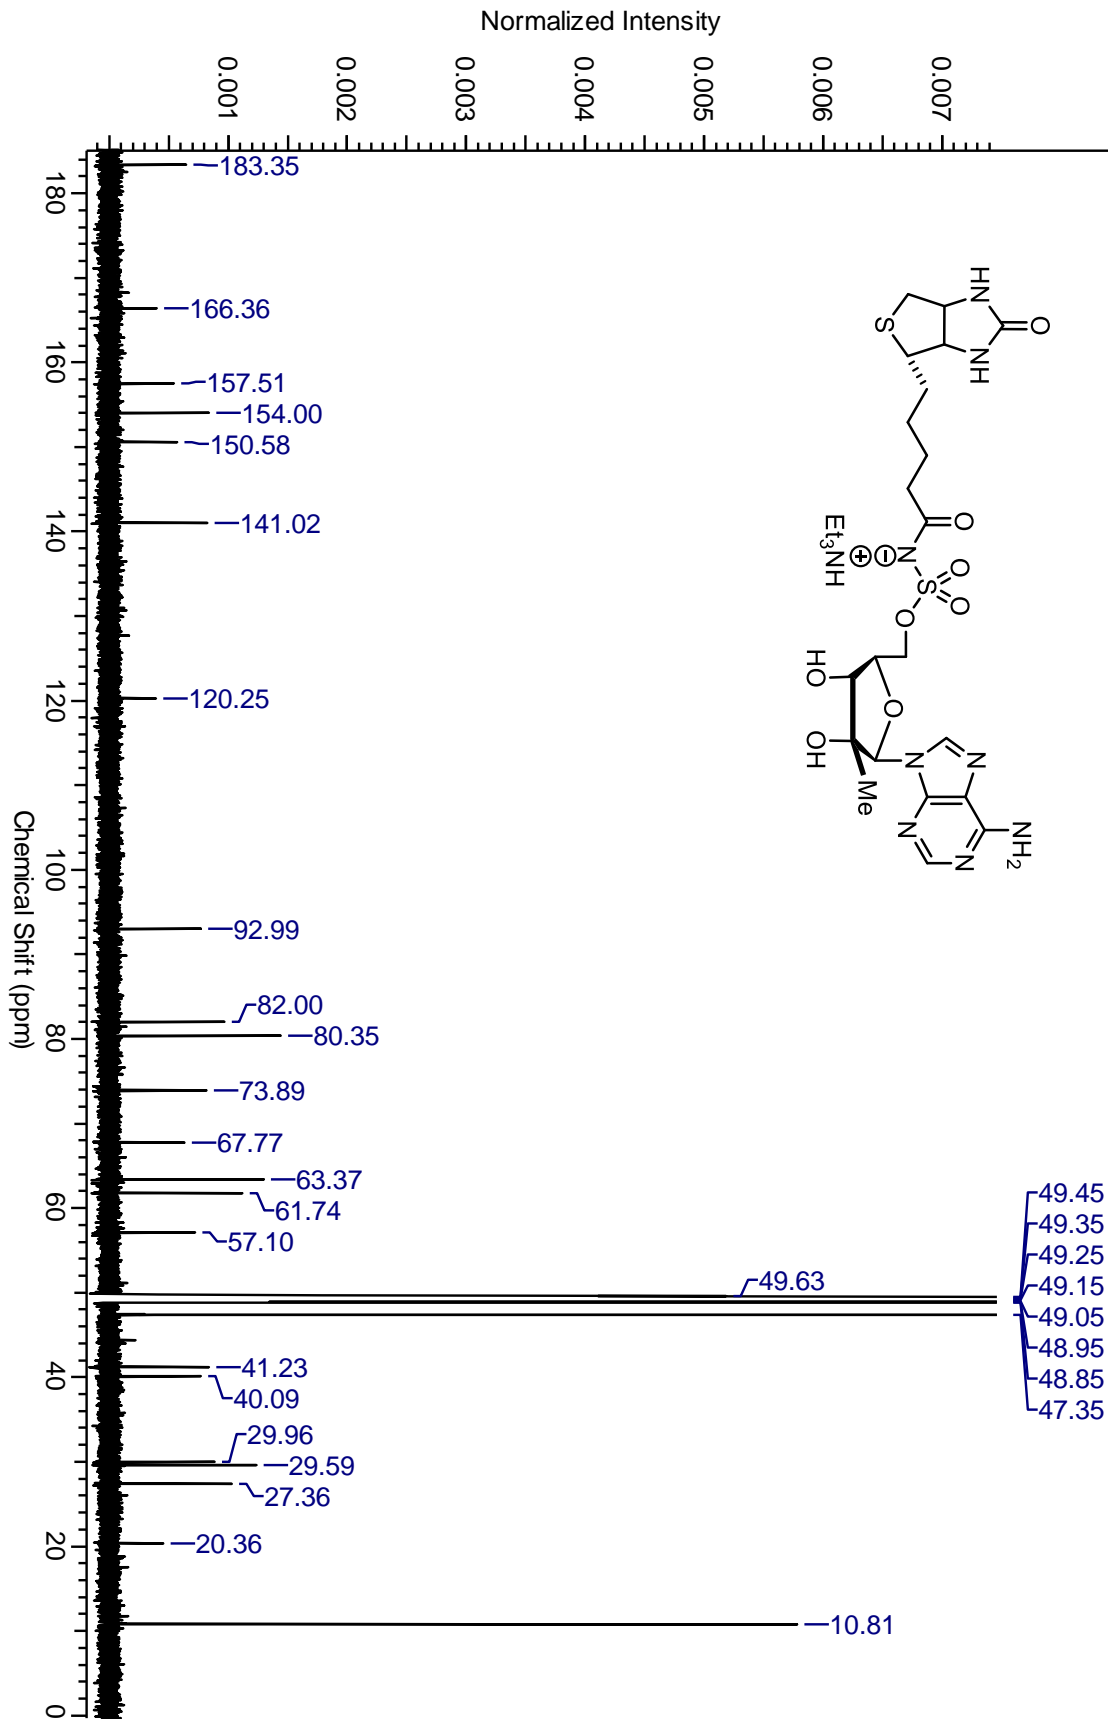

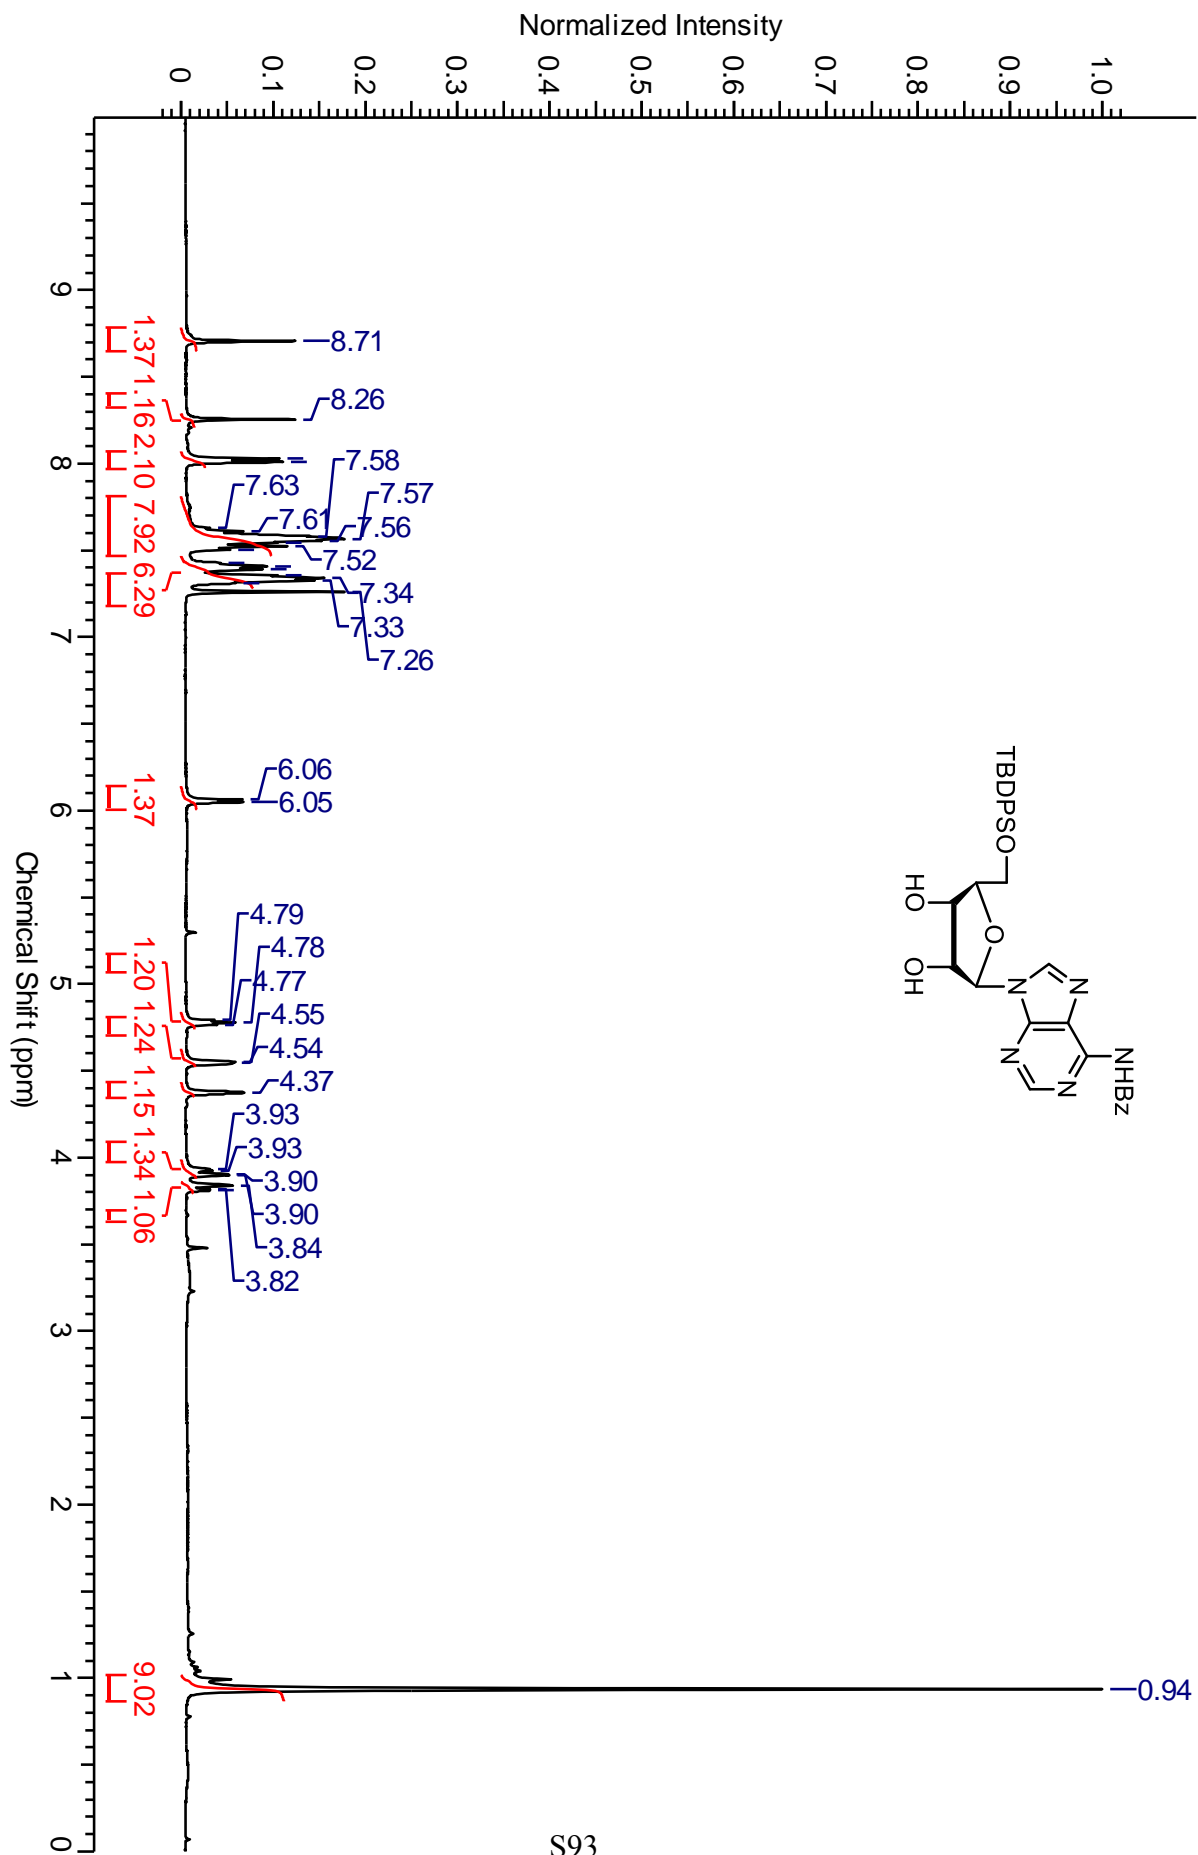

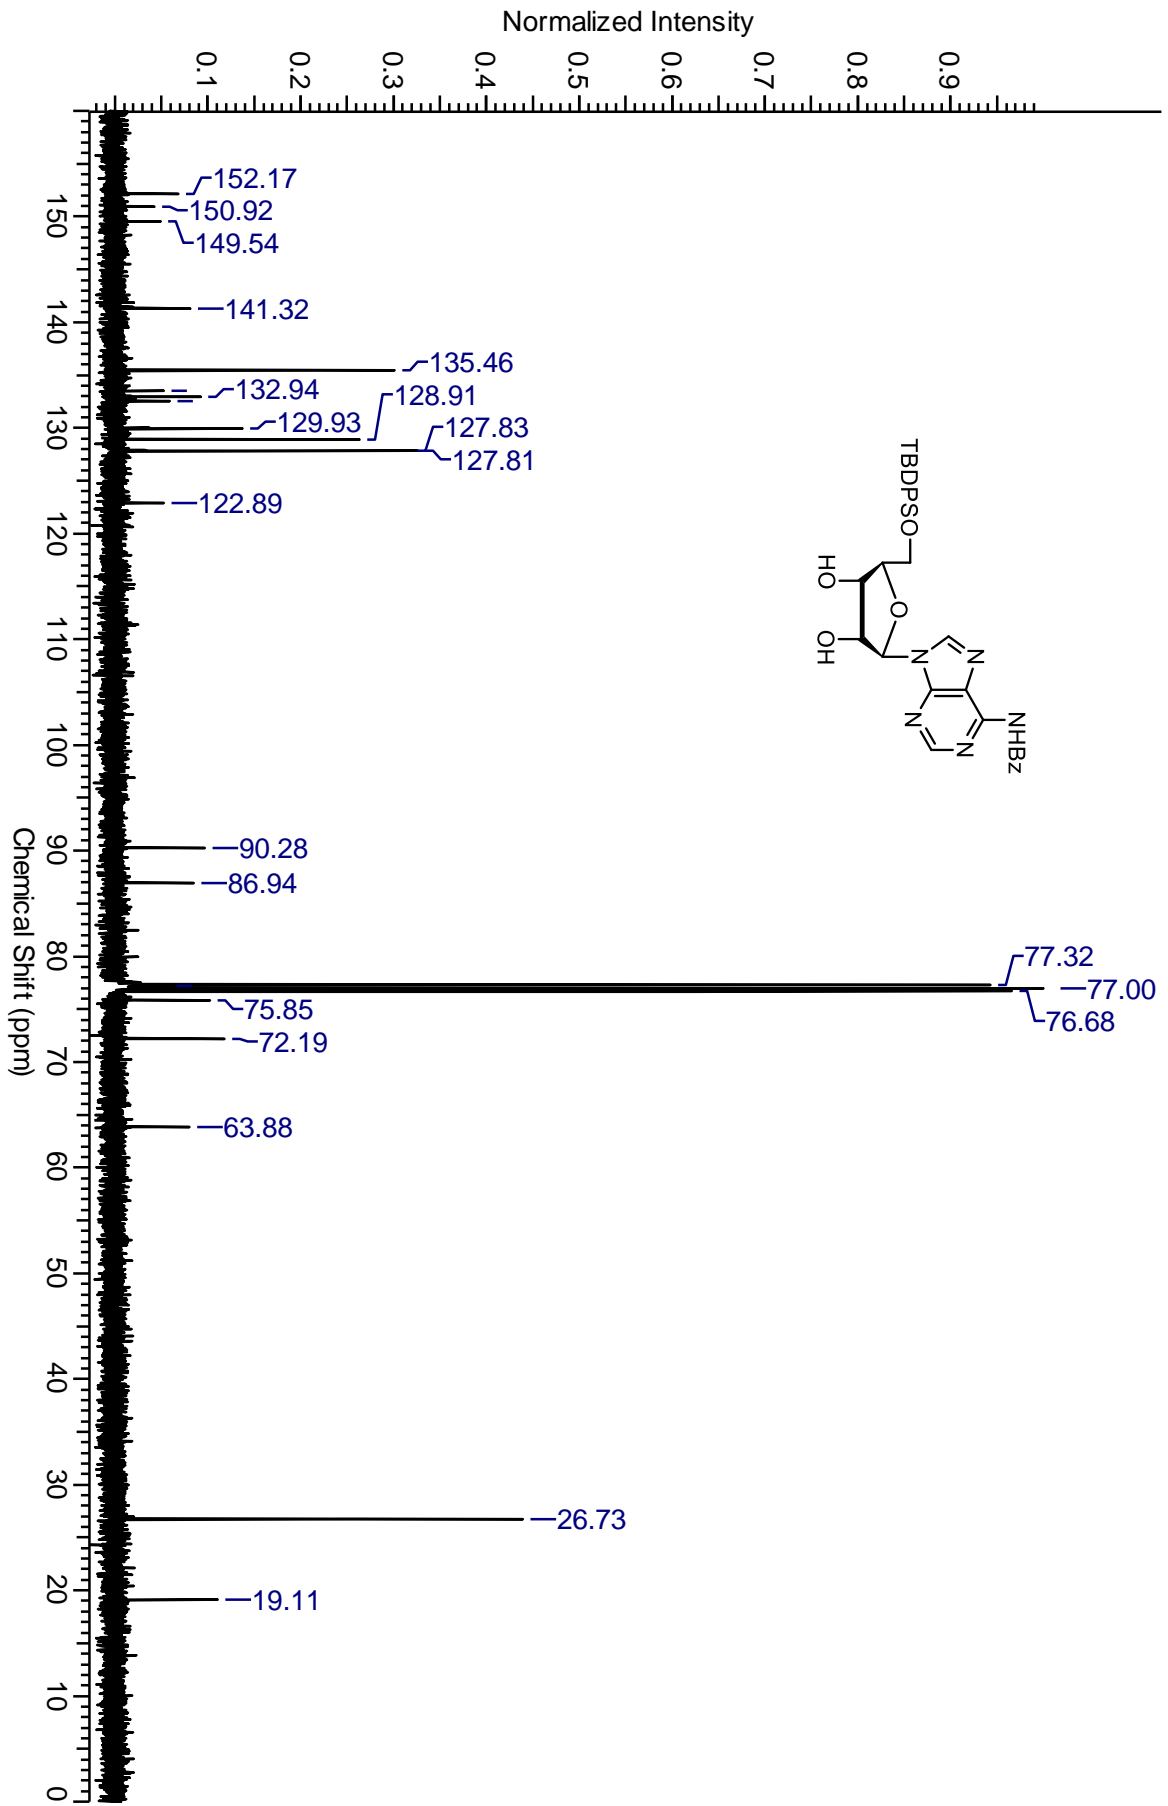

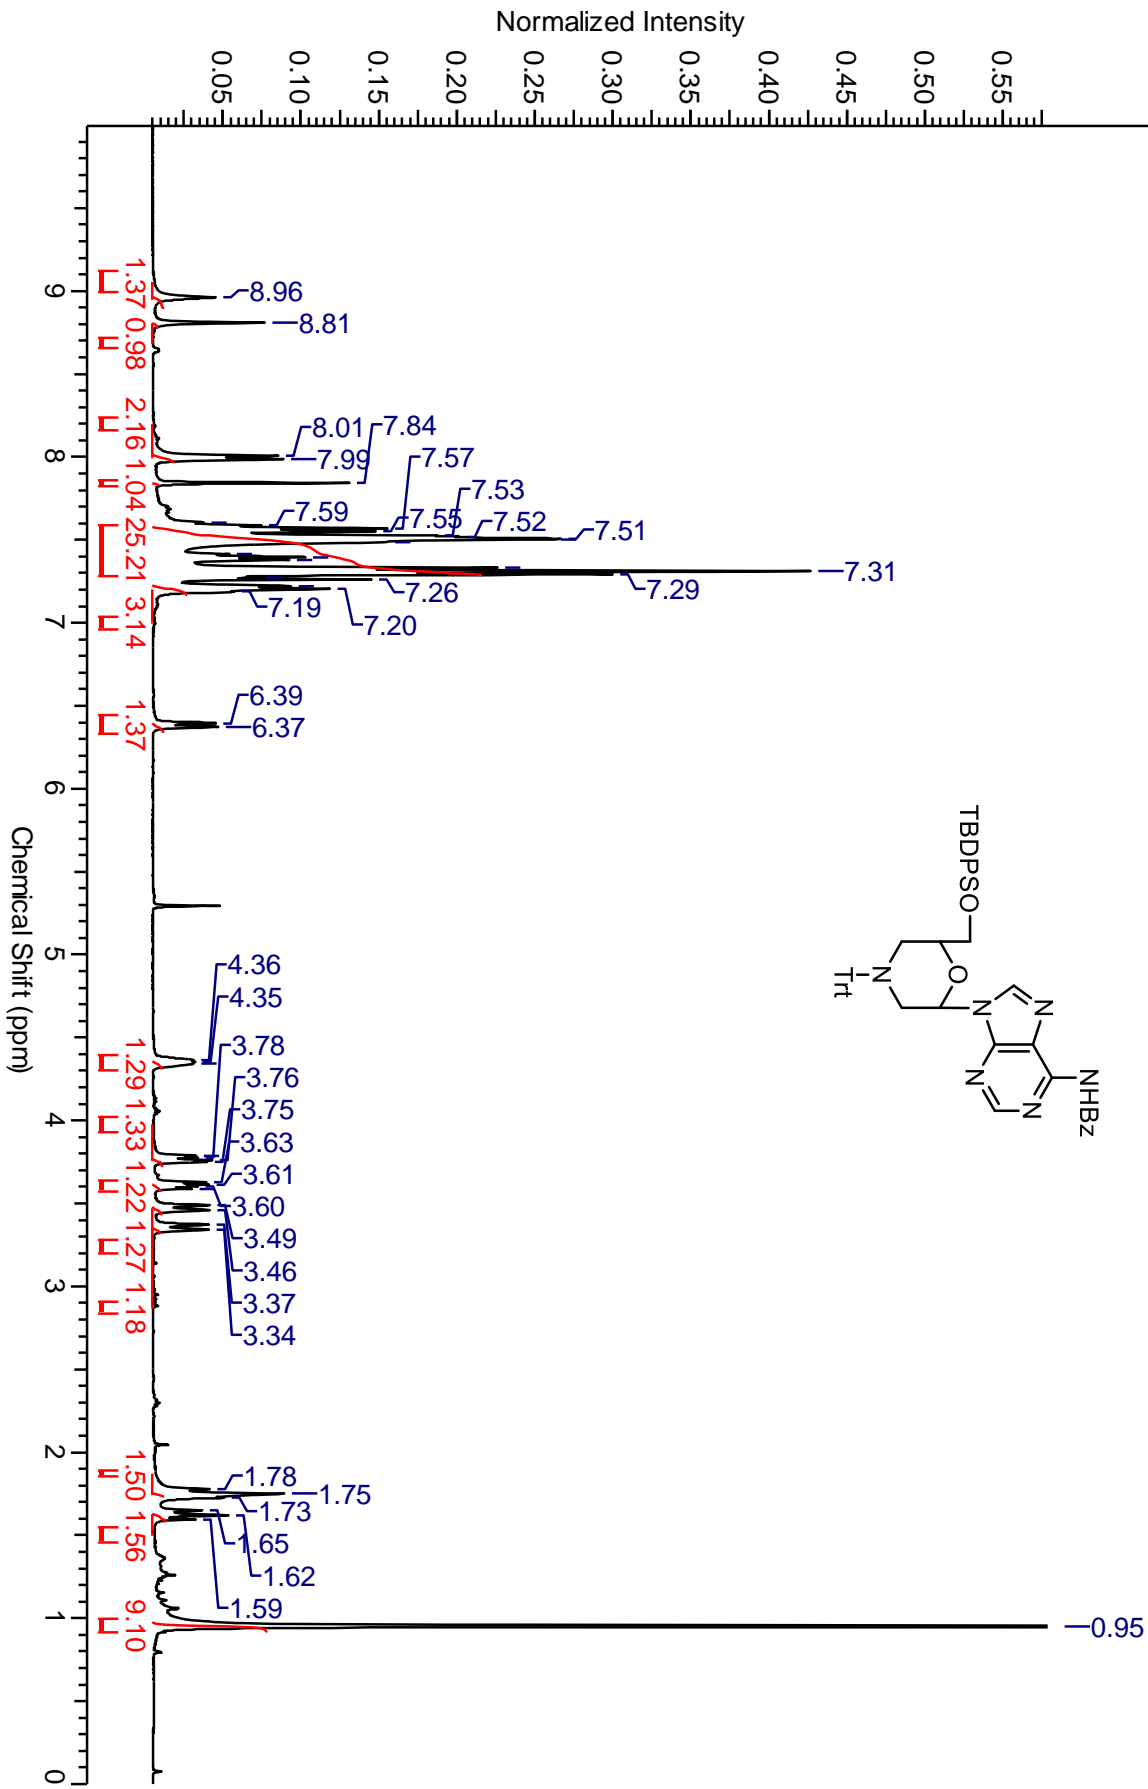

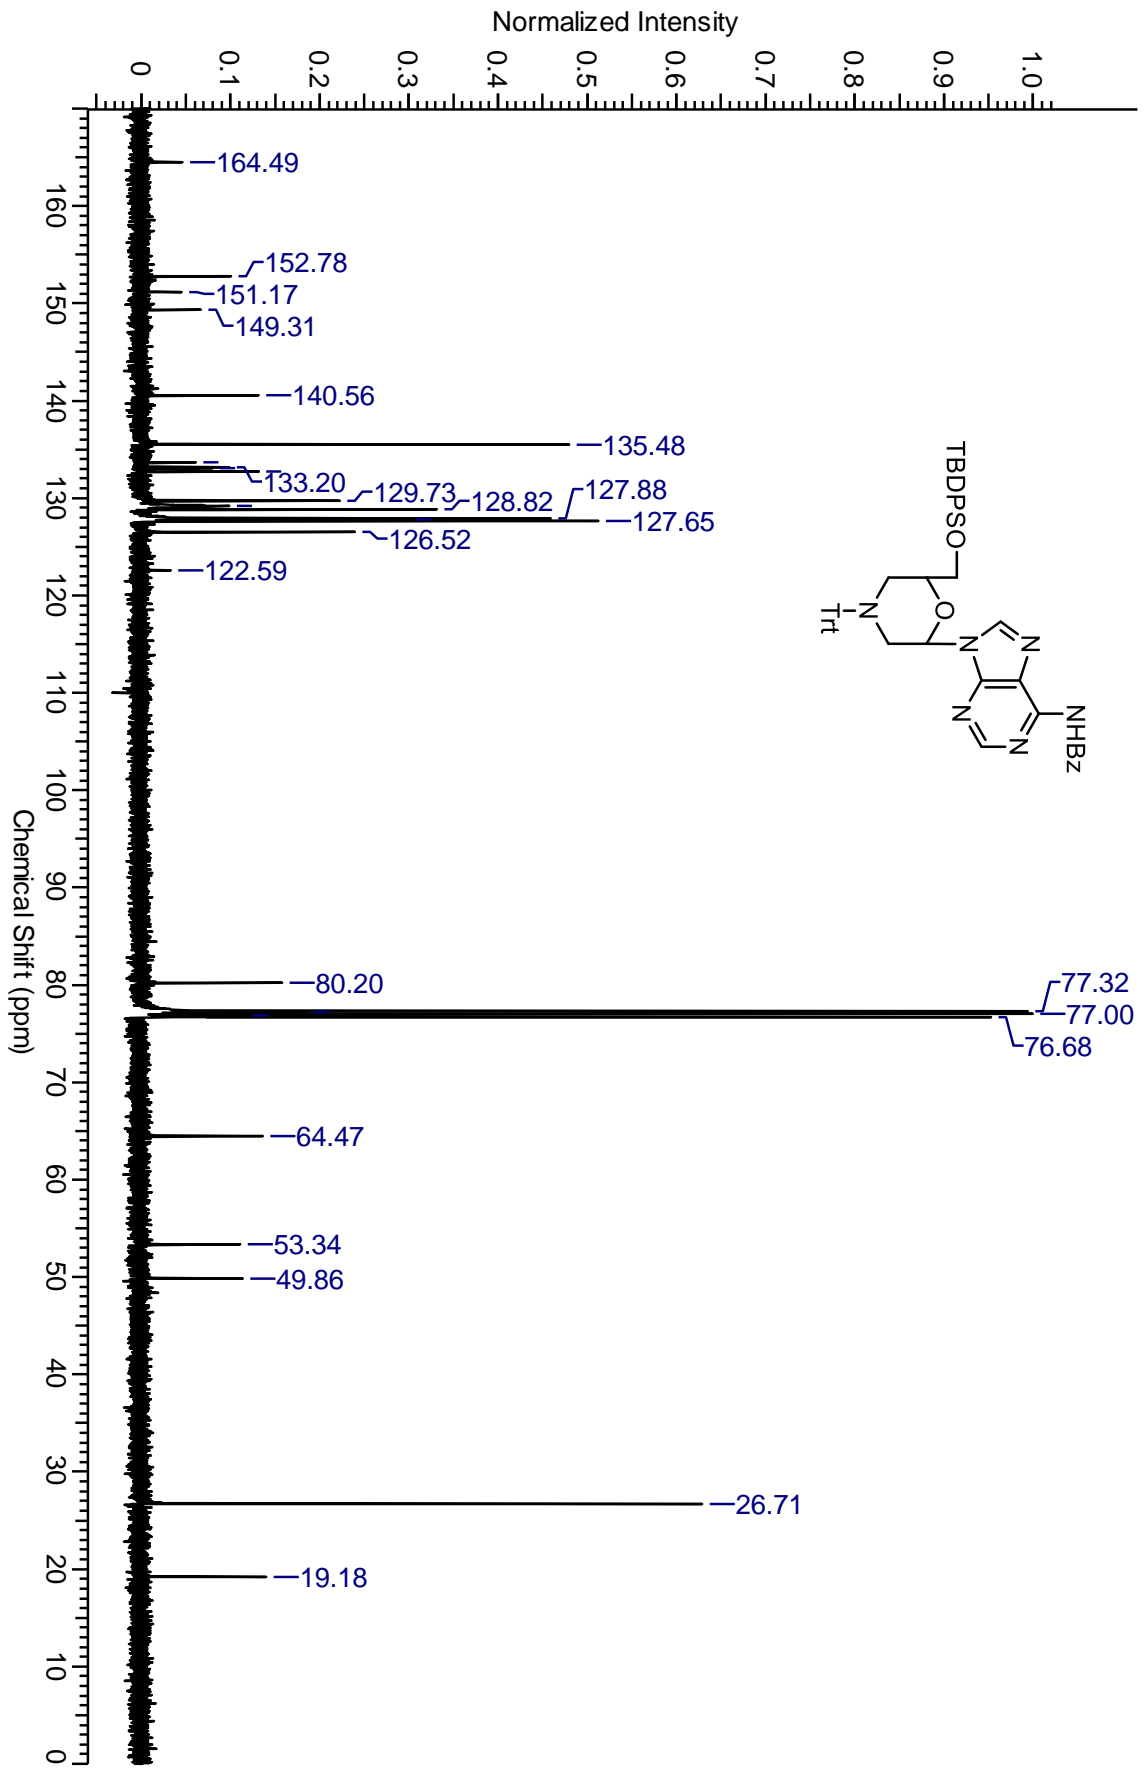

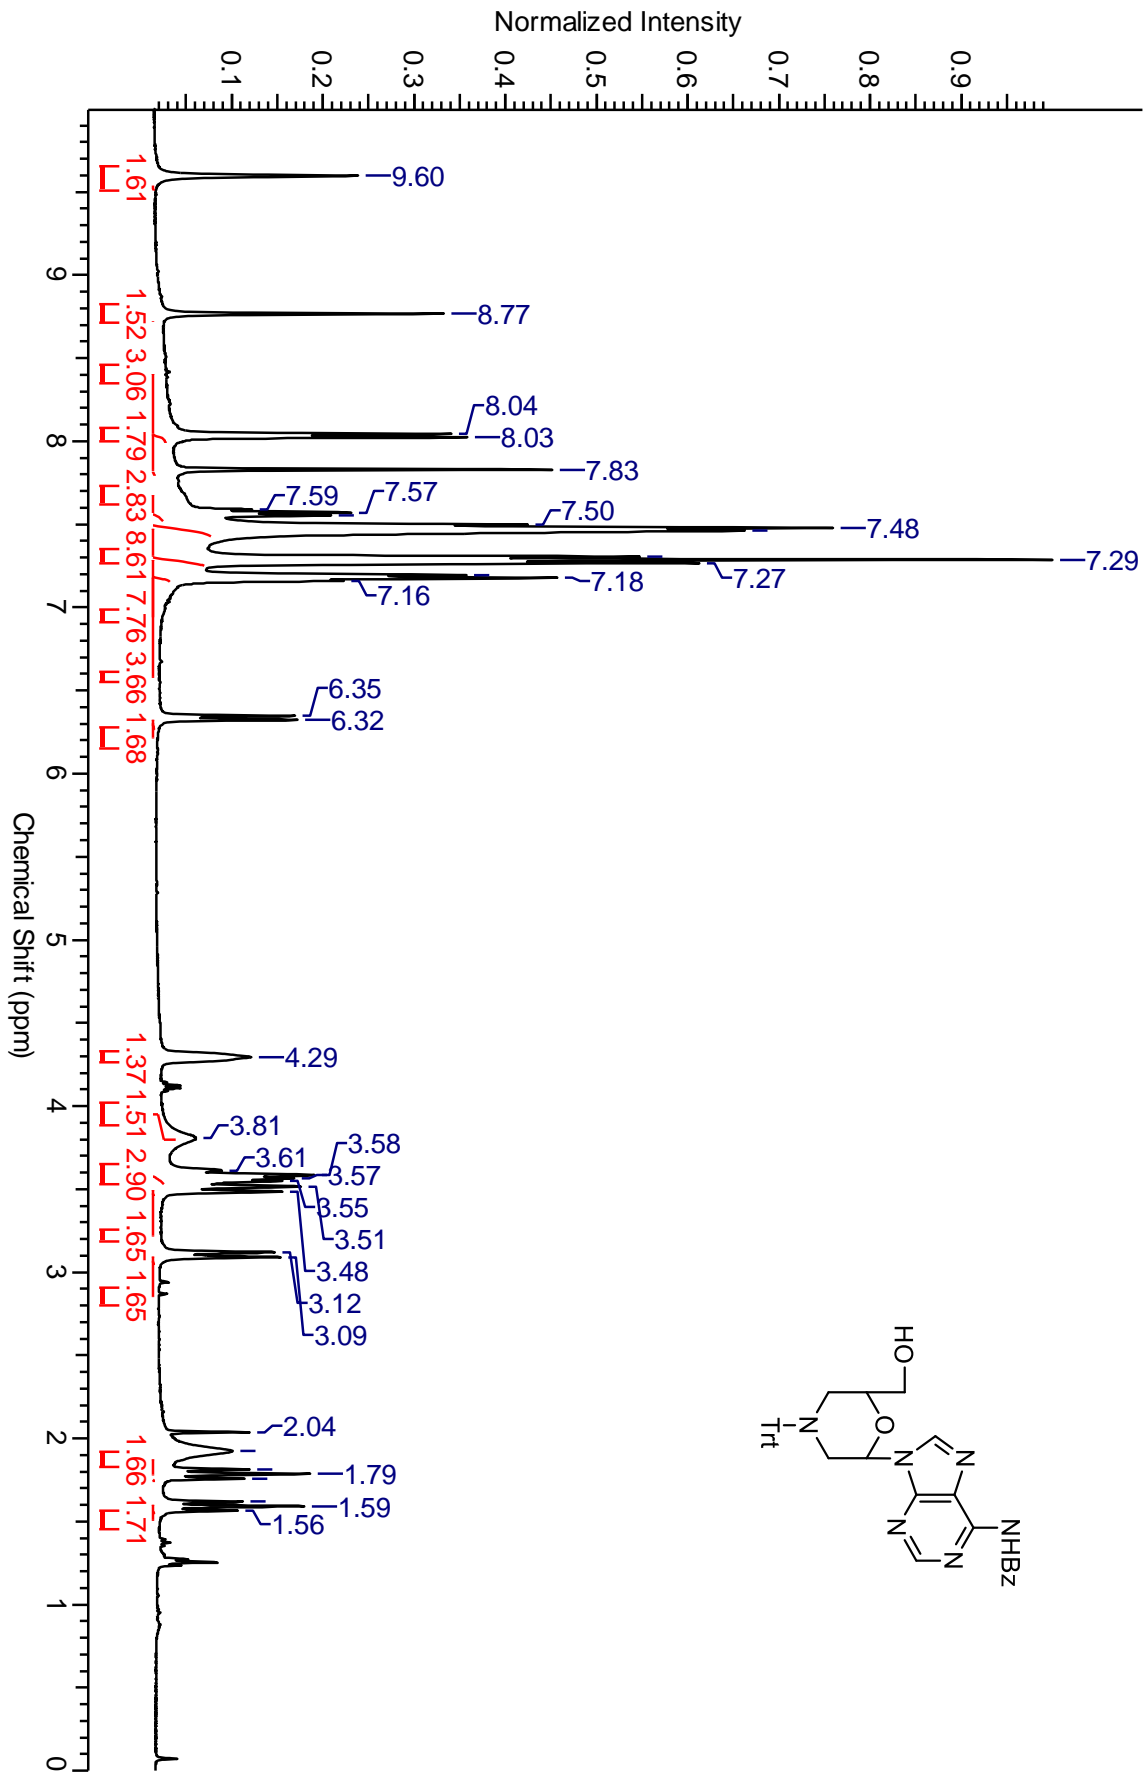

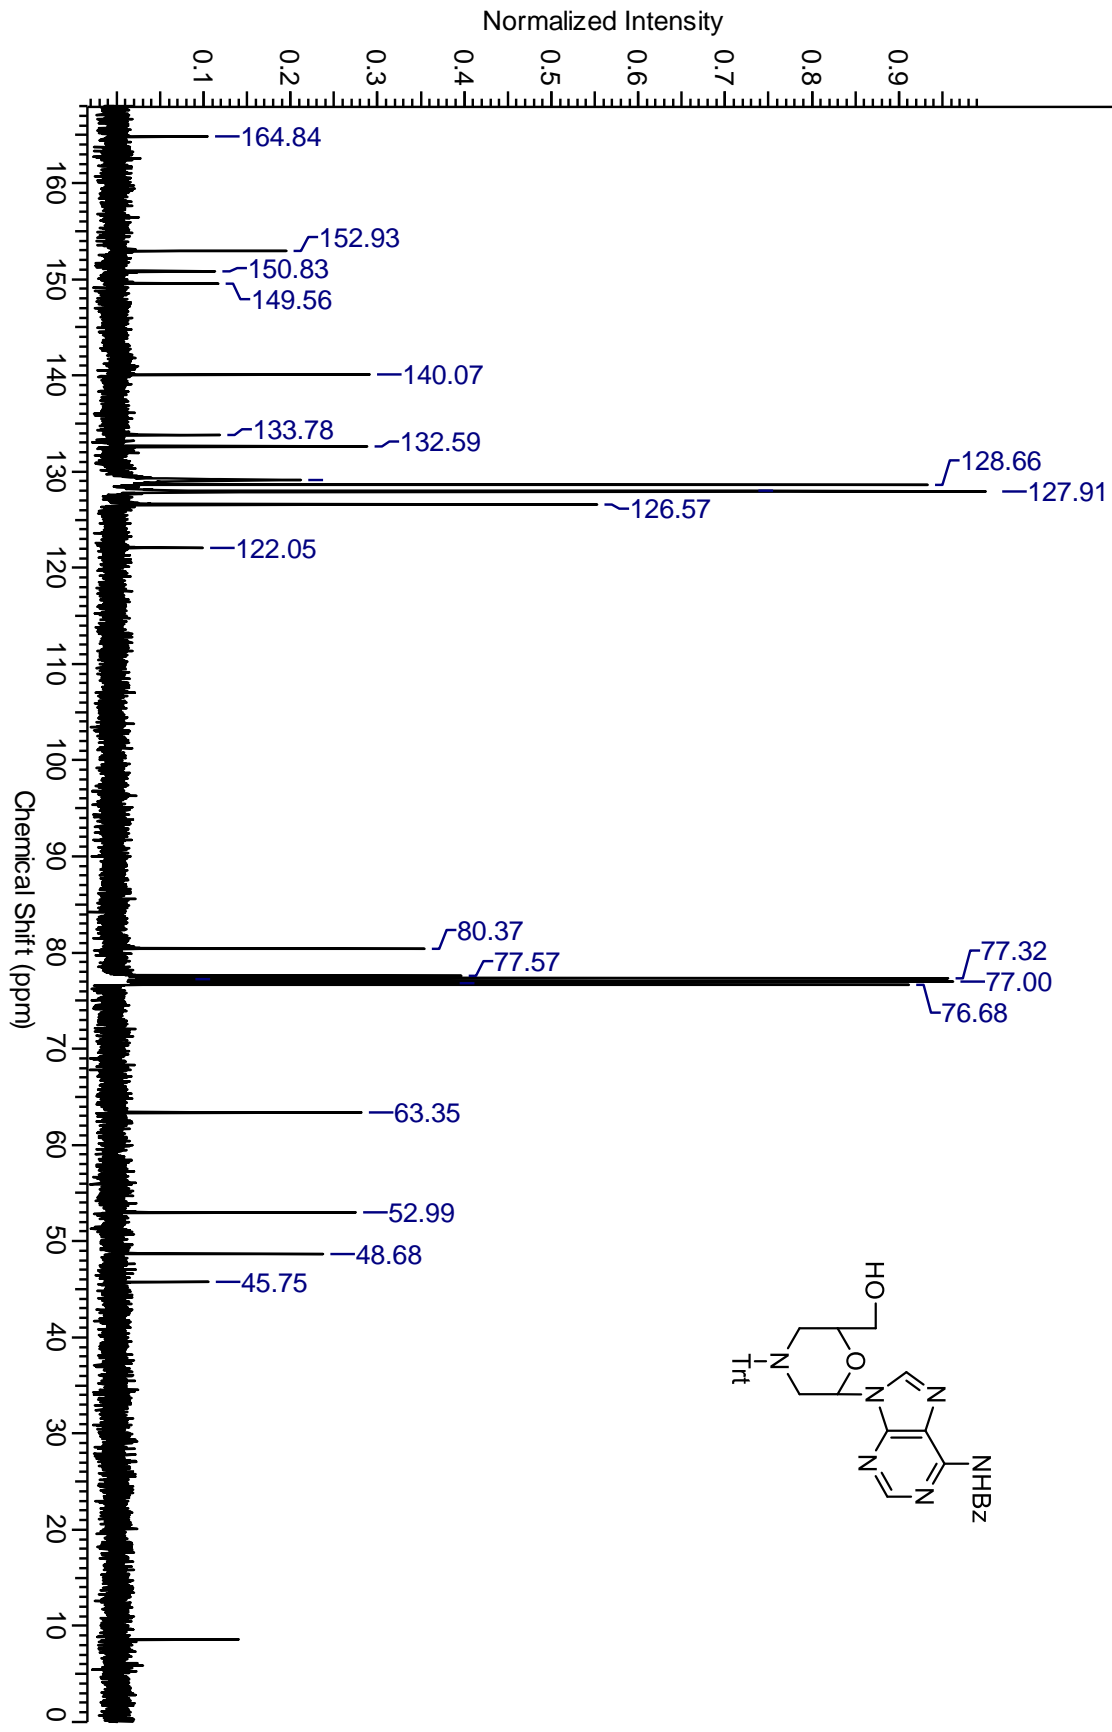

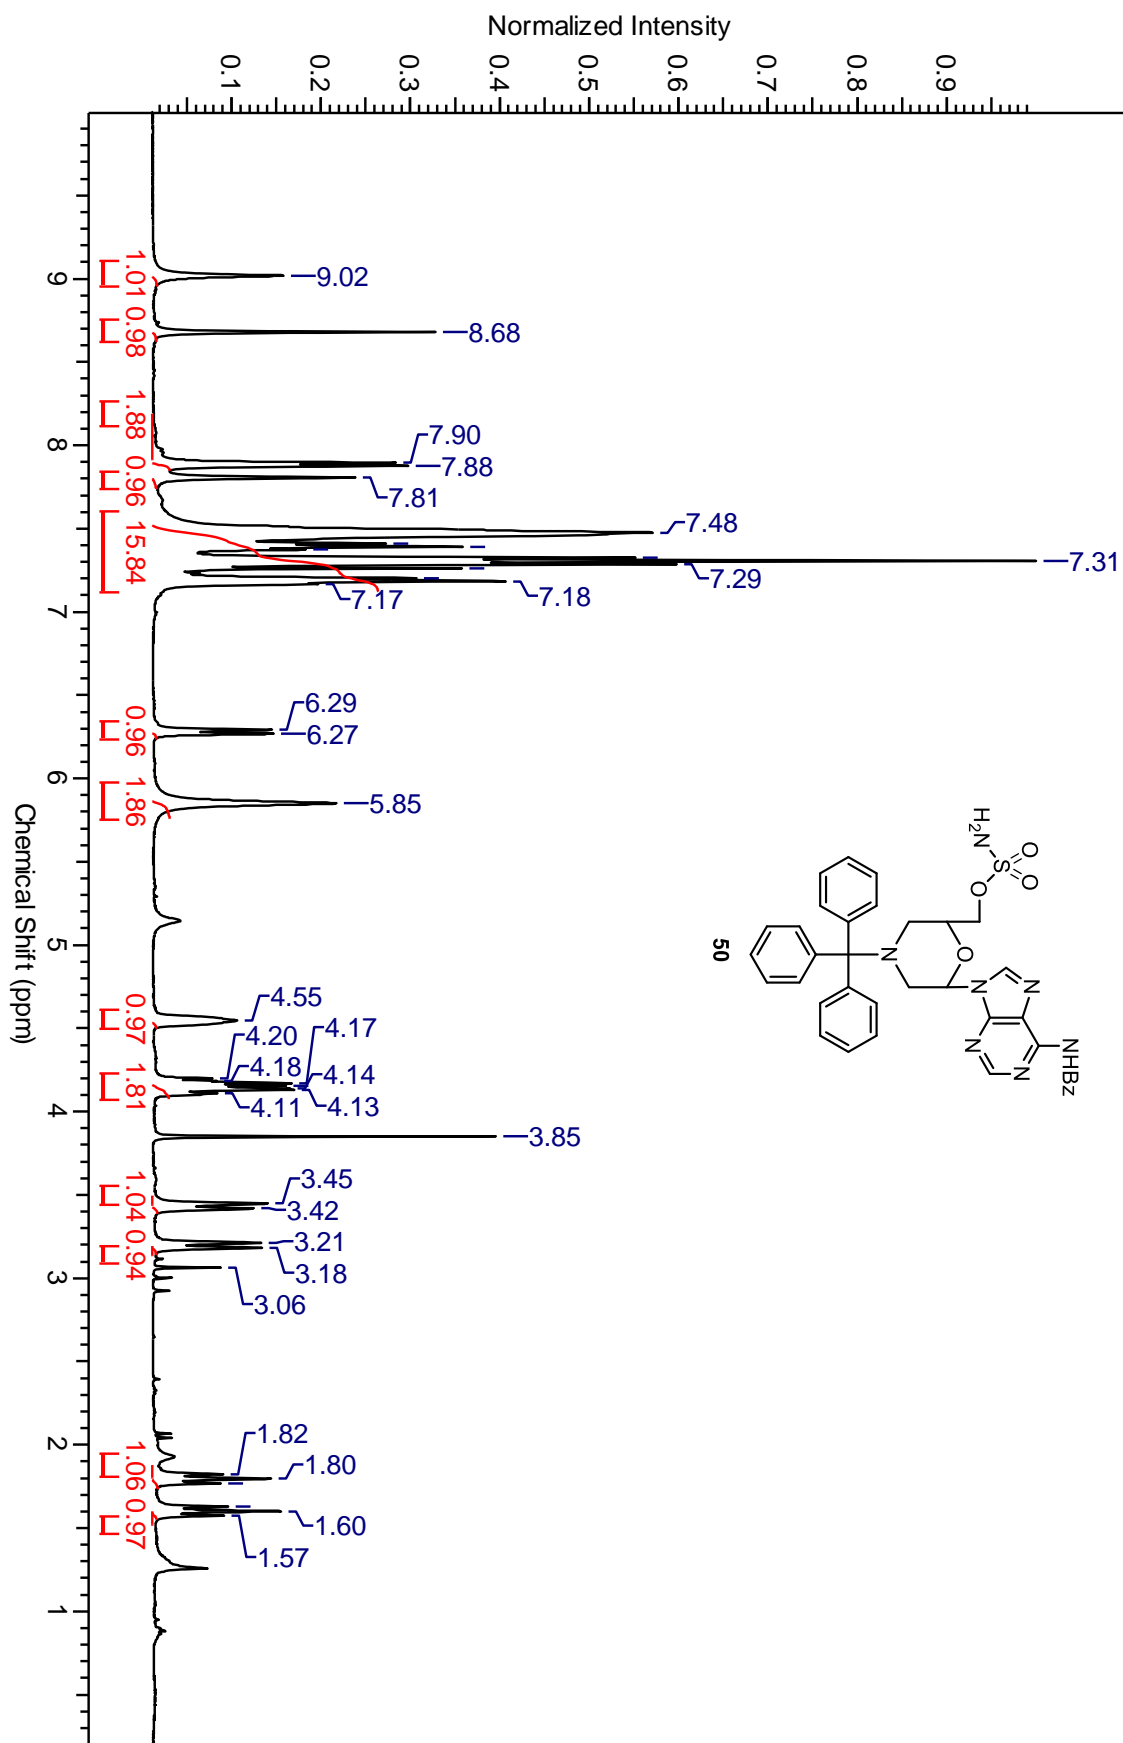



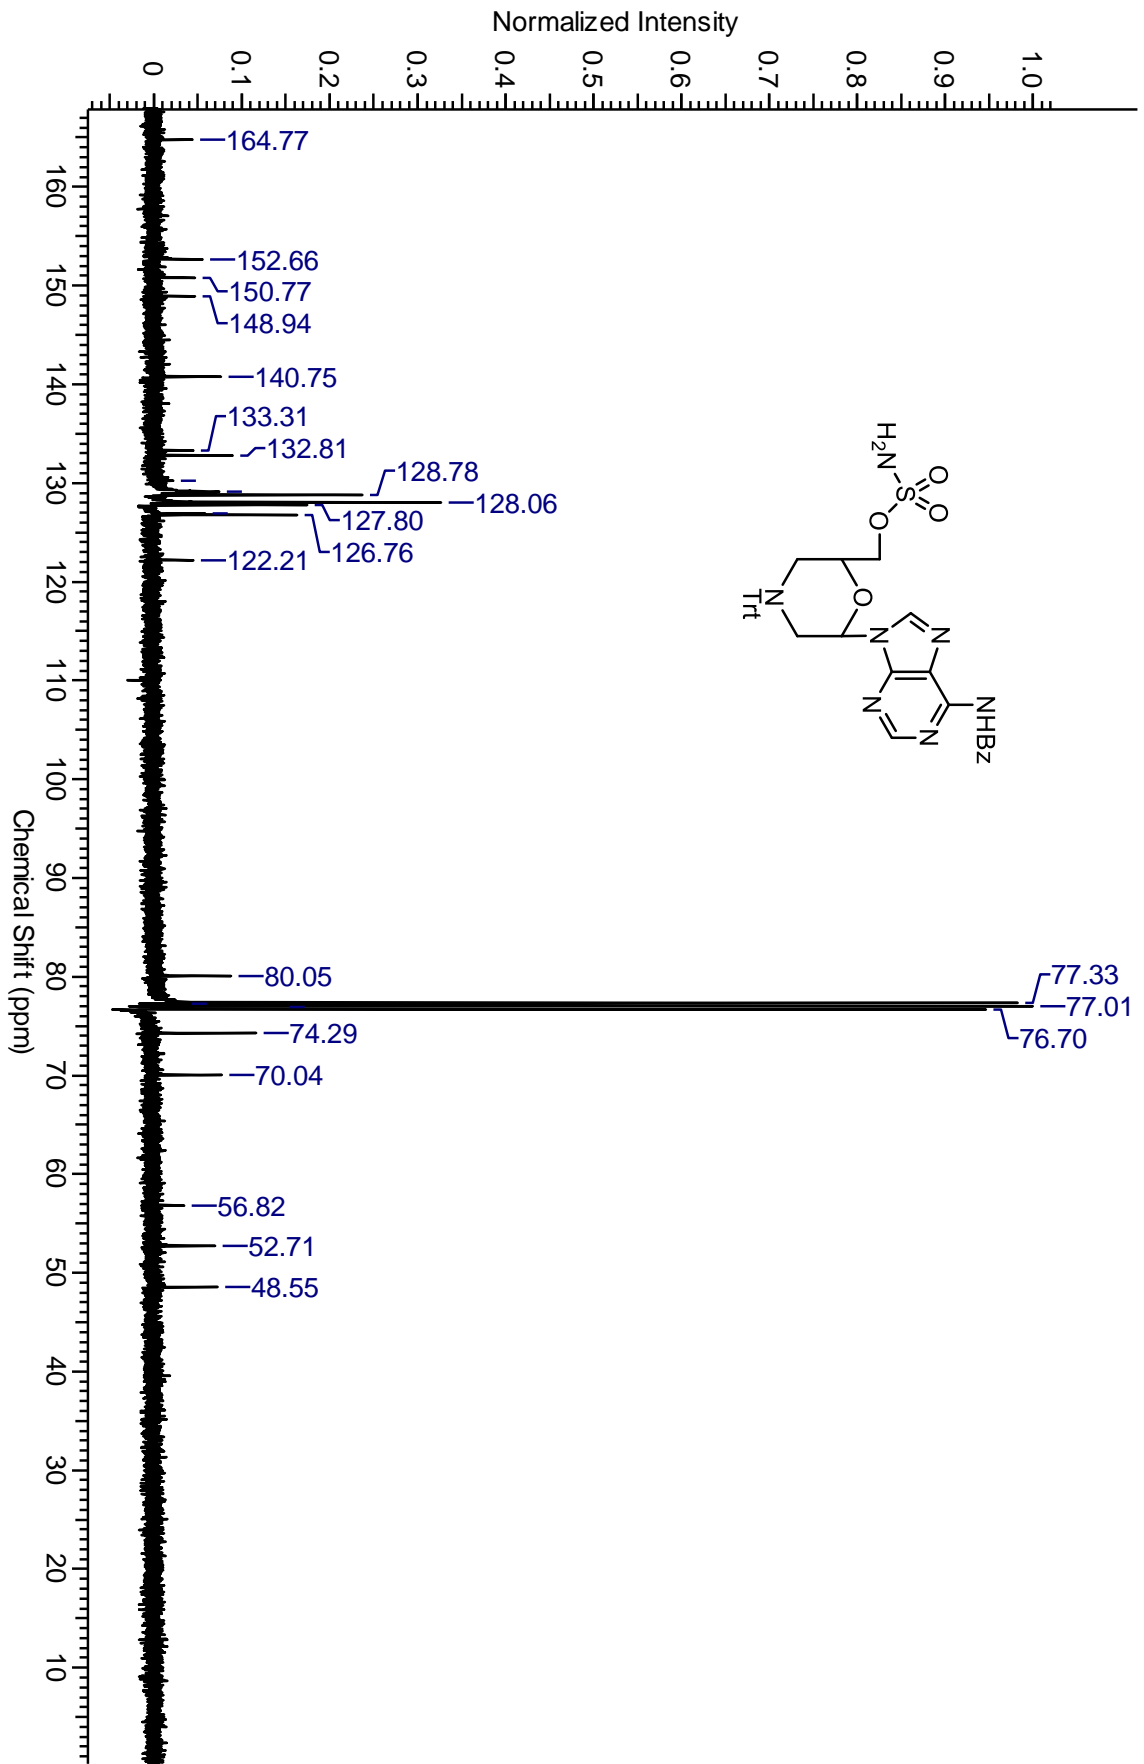

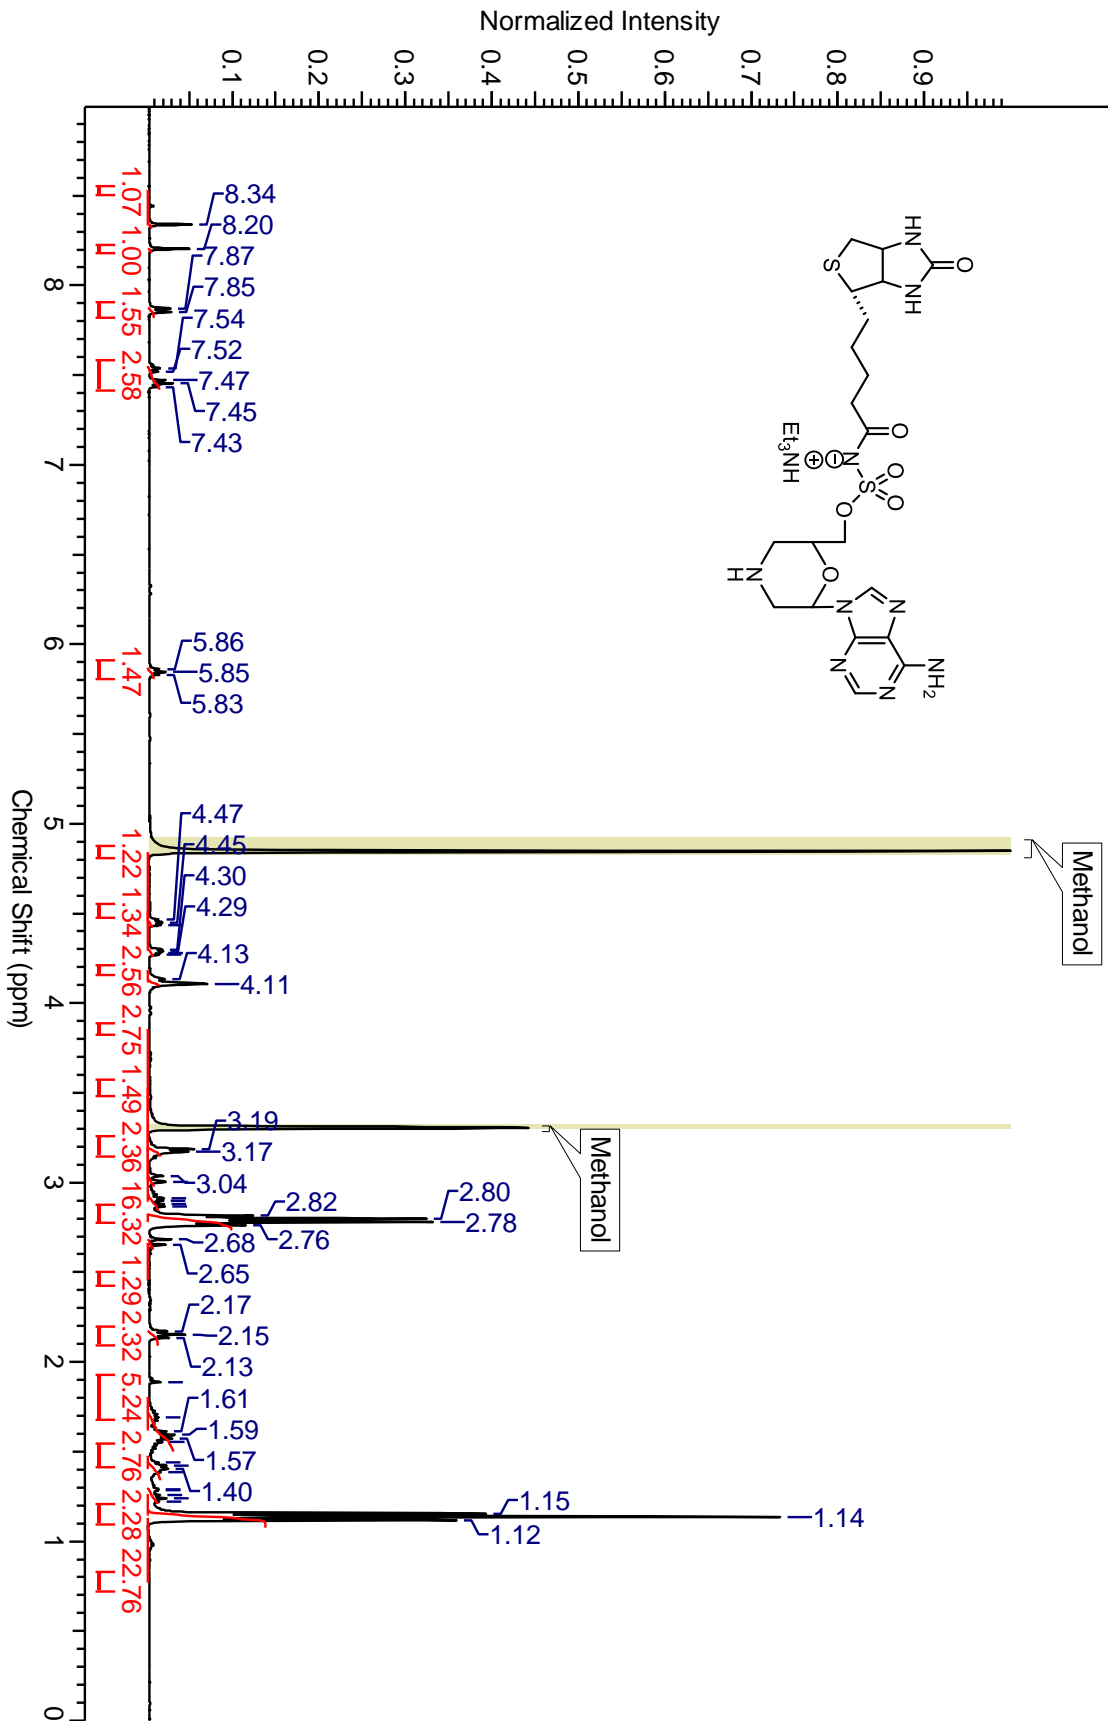

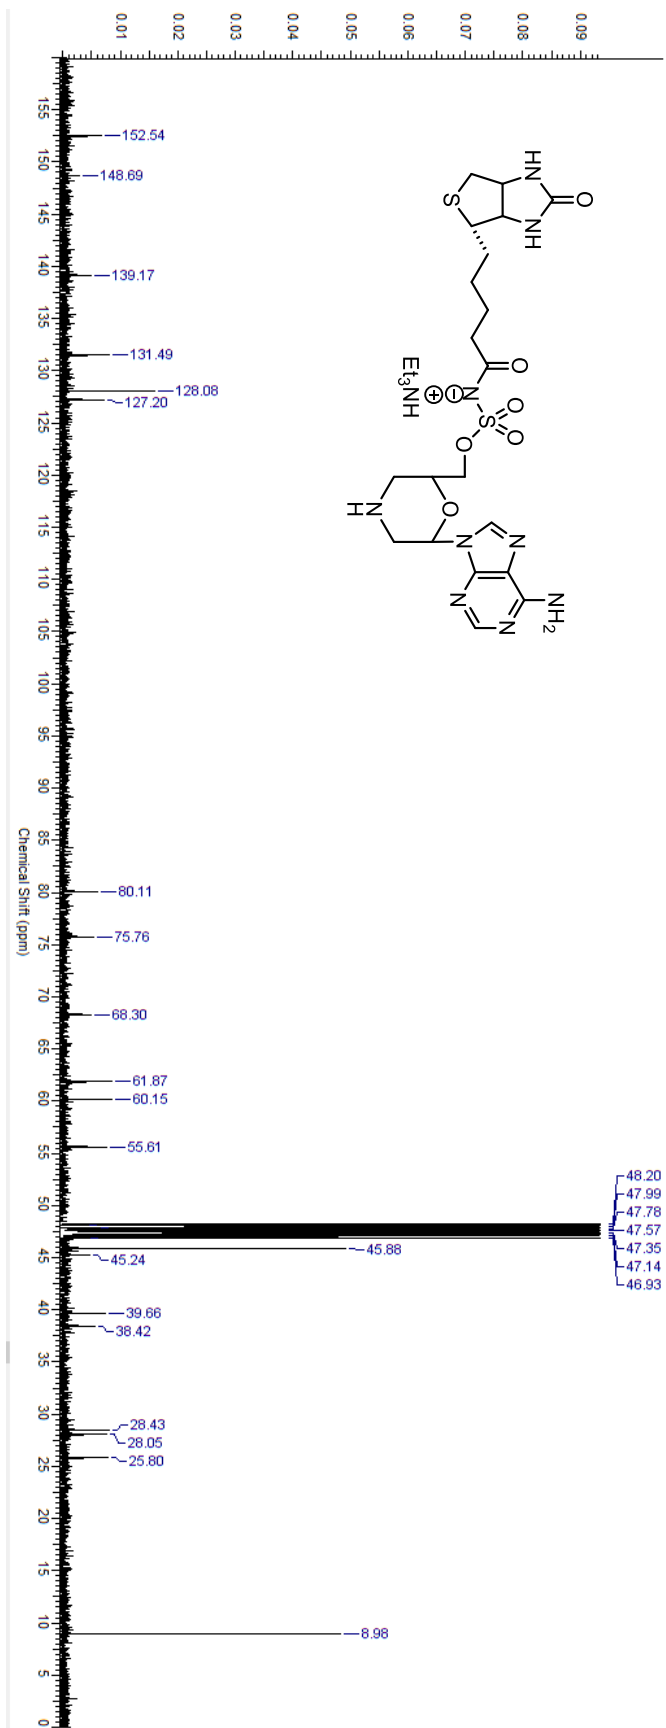

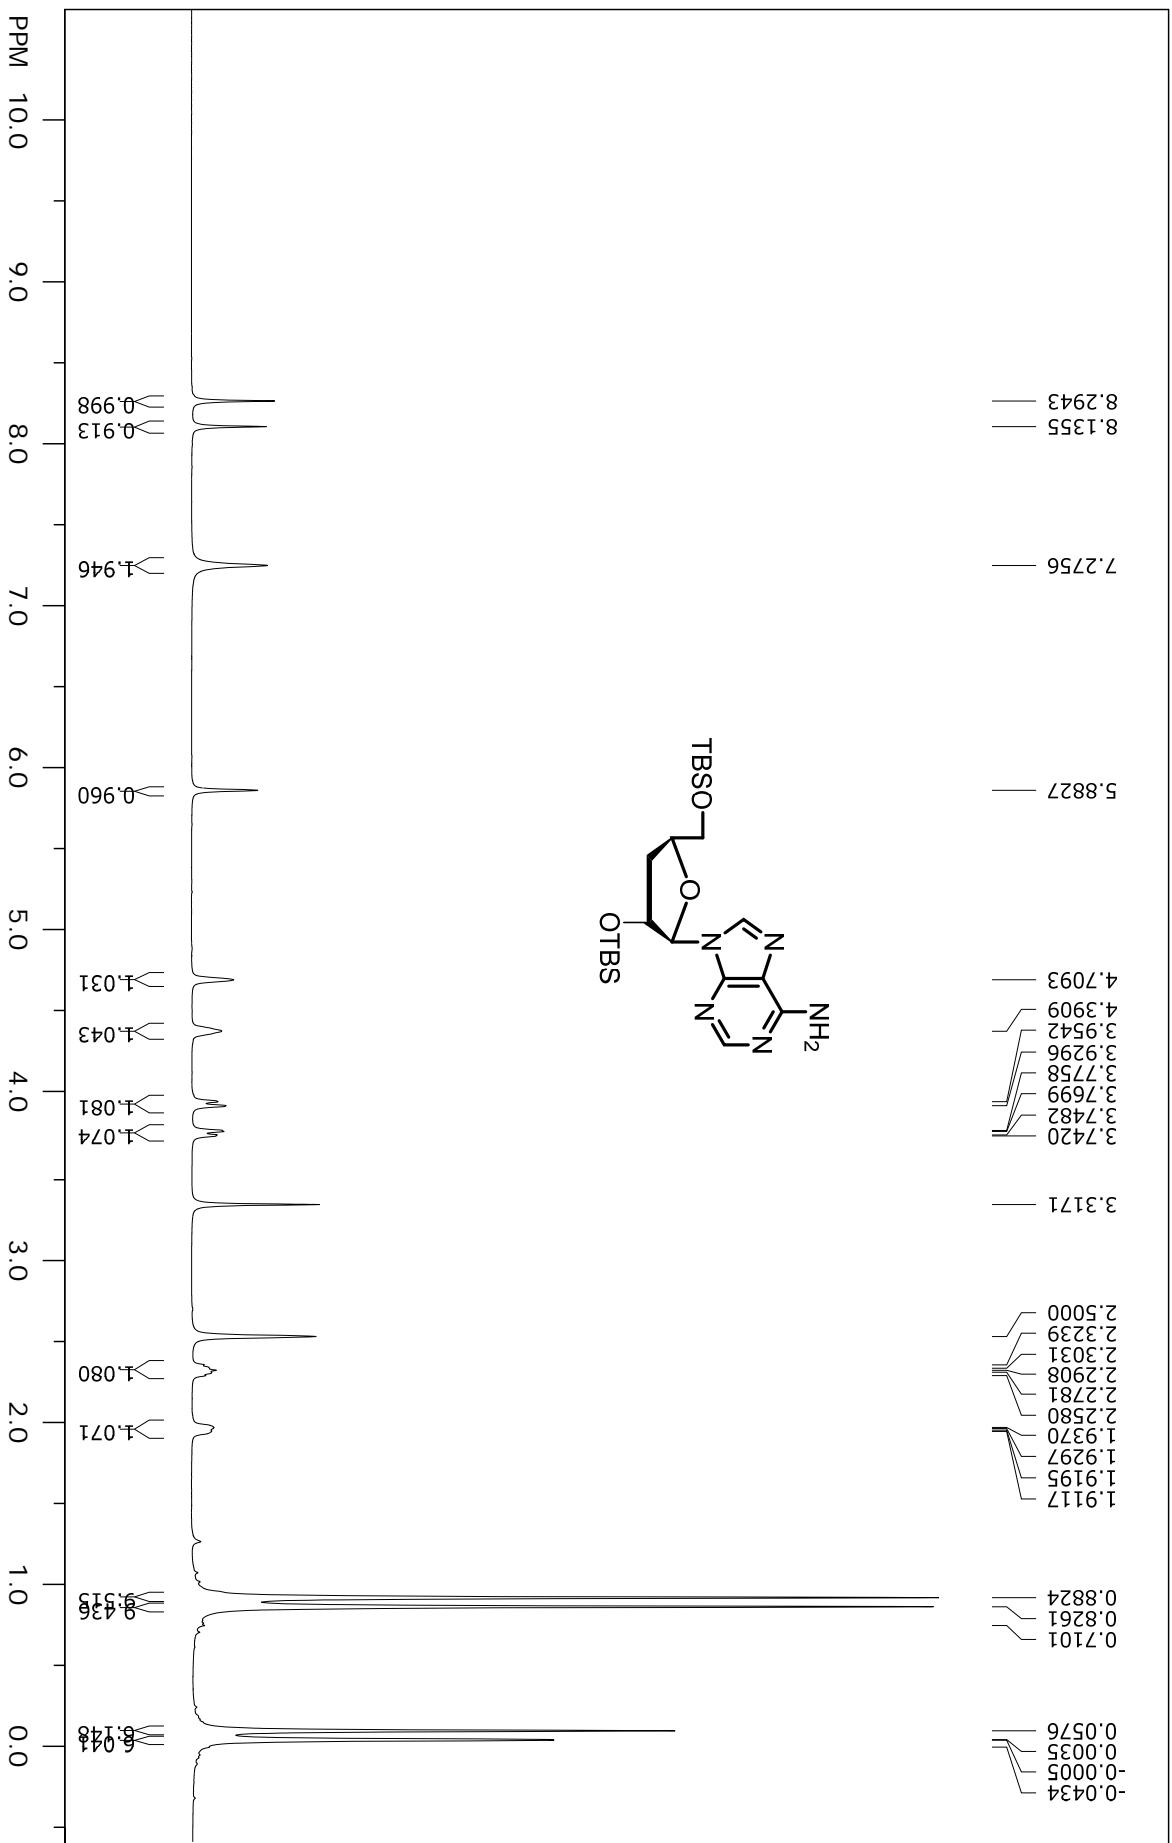

file: ...-01-265-PROTON\_20131014\_01.fid\fid block# 1 exp1: "s2pu1"  
 transmitter freq.: 399.751031 MHz  
 time domain size: 32768 points  
 width: 6410.26 Hz = 16.0356 ppm = 0.195626 Hz/pt  
 number of scans: 64

freq. of 0 ppm: 399.748619 MHz  
 processed size: 32768 complex points  
 LB: 0.000 GF: 0.0000  
 Hz/cm: 181.481 ppm/cm: 0.45399

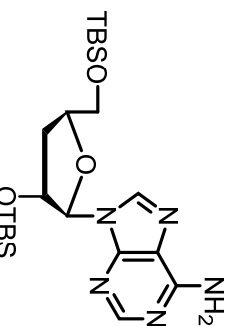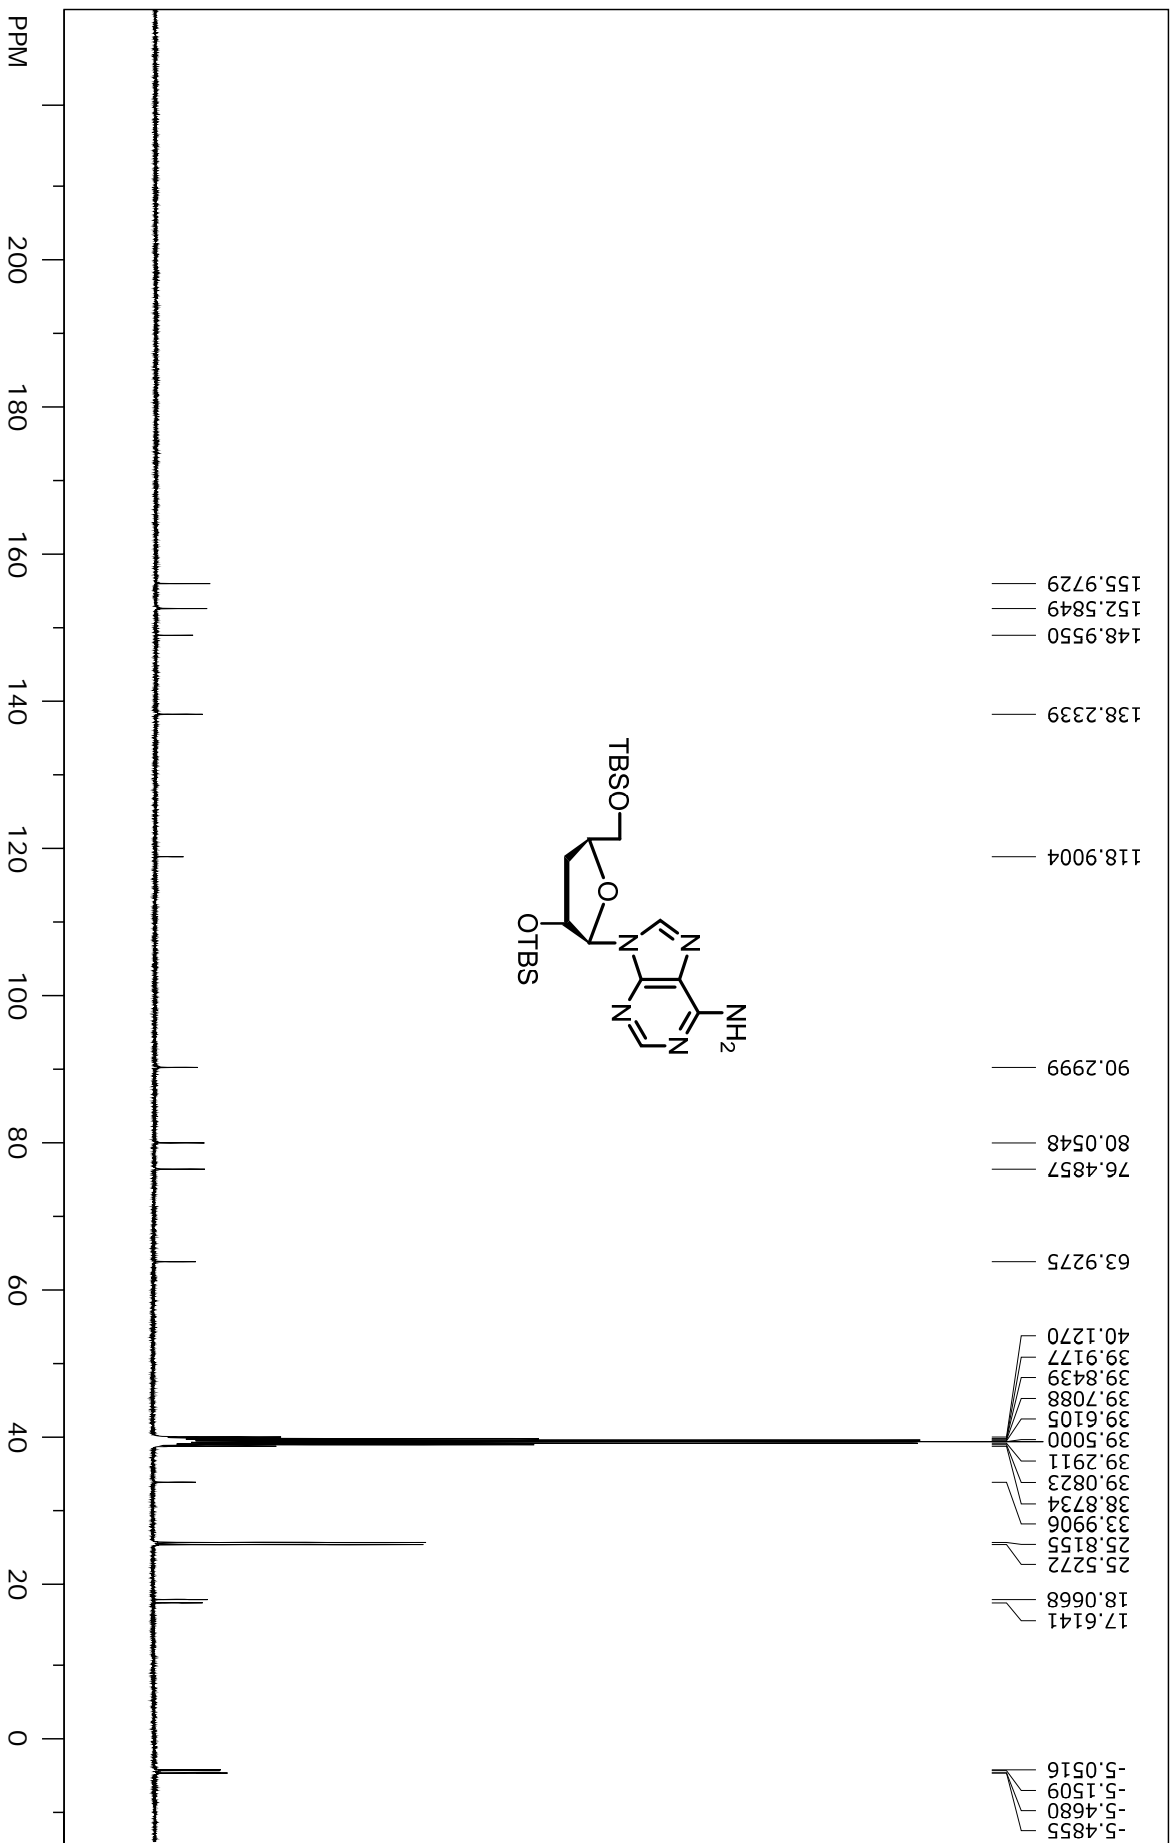

file: ...1-265-CARBON-2\_20131026\_01.fid\fid block# 1 expt: "s2pu1"  
 transmitter freq.: 100.527931 MHz  
 time domain size: 65536 points  
 width: 25000.00 Hz = 248.6871 ppm = 0.381470 Hz/pt  
 number of scans: 20000

freq. of 0 ppm: 100.516919 MHz  
 processed size: 65536 complex points  
 LB: 0.000 GF: 0.0000  
 Hz/cm: 1000.000 ppm/cm: 9.94748

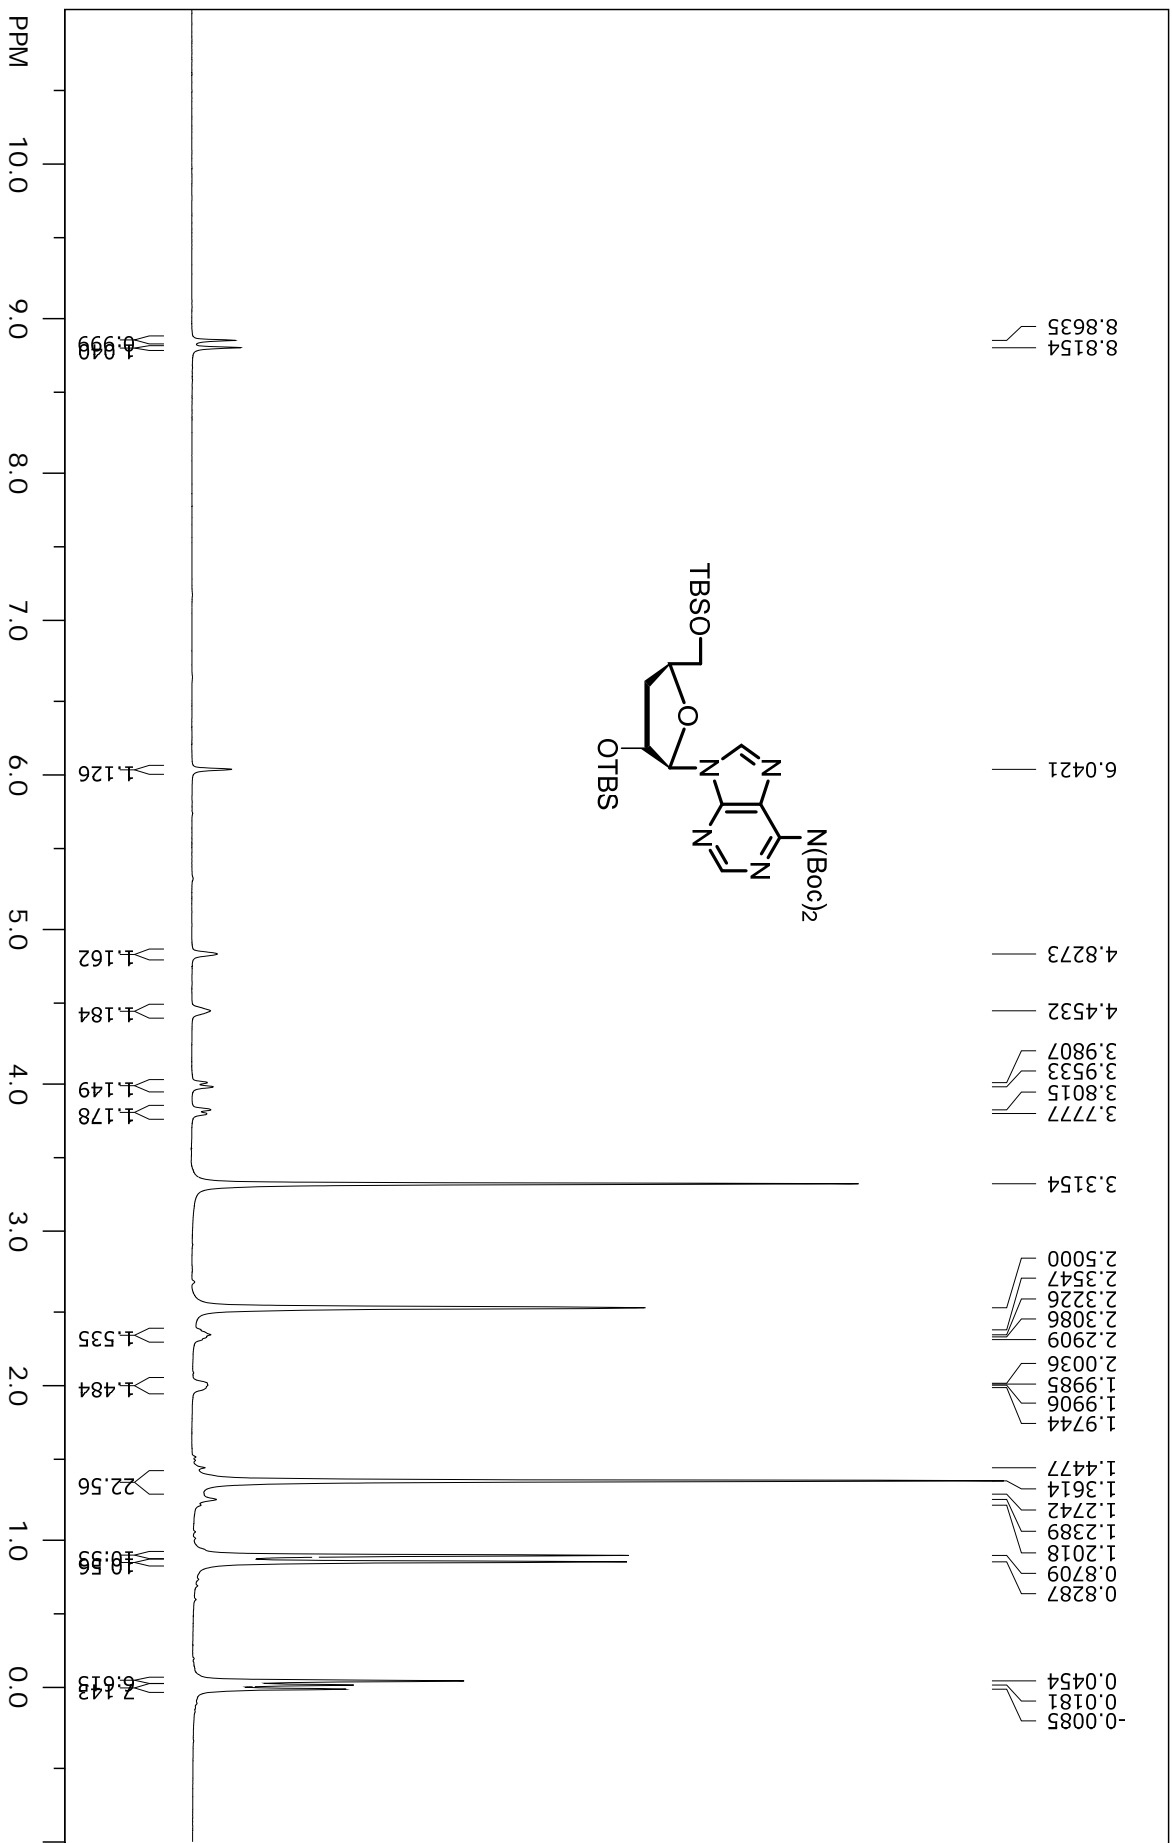

file: ...02-119-PROTONN\_20131014\_01.fid\fid block# 1 expt: "s2pu1"  
 transmitter freq.: 399.751031 MHz  
 time domain size: 32768 points  
 width: 6410.26 Hz = 16.0356 ppm = 0.195626 Hz/pt  
 number of scans: 128

freq. of 0 ppm: 399.748619 MHz  
 processed size: 32768 complex points  
 LB: 0.000 GF: 0.0000  
 Hz/cm: 192.735 ppm/cm: 0.48214

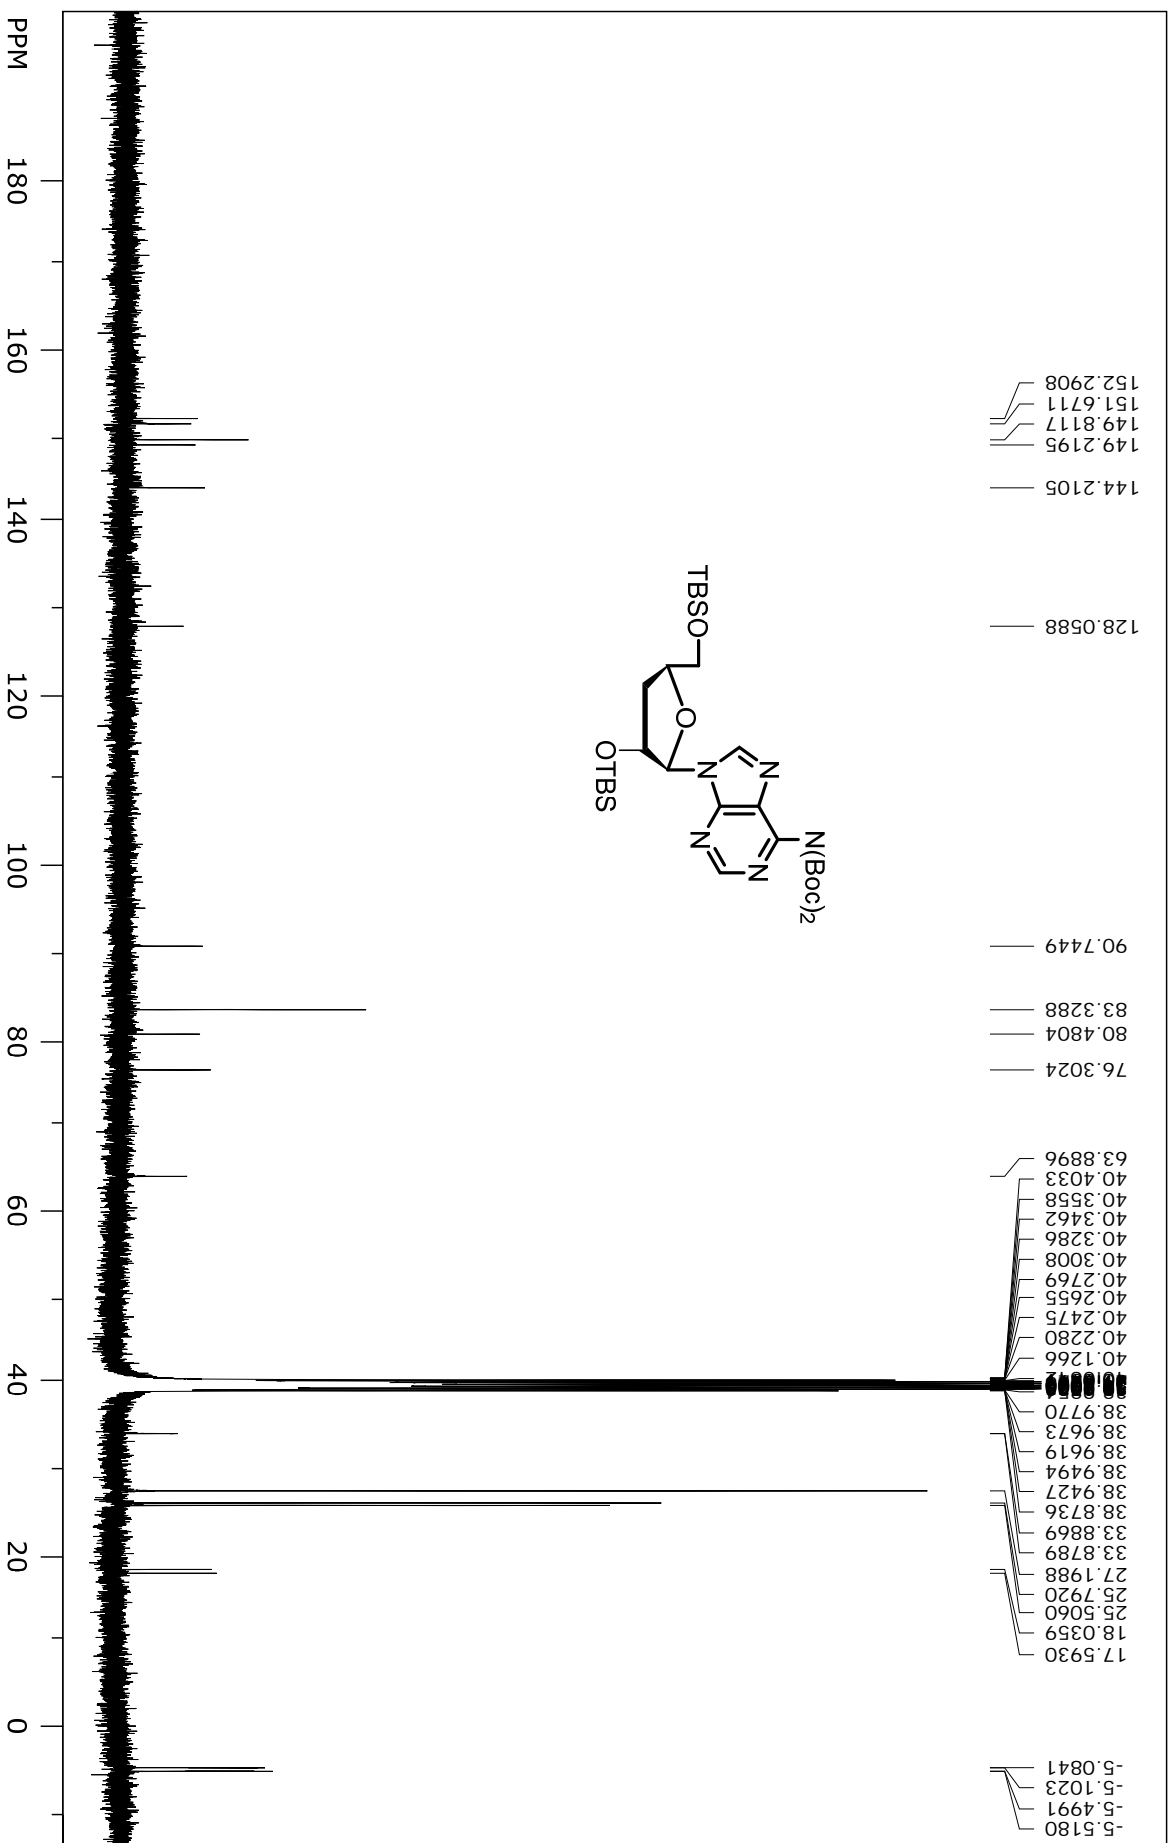

SpinWorks 3:

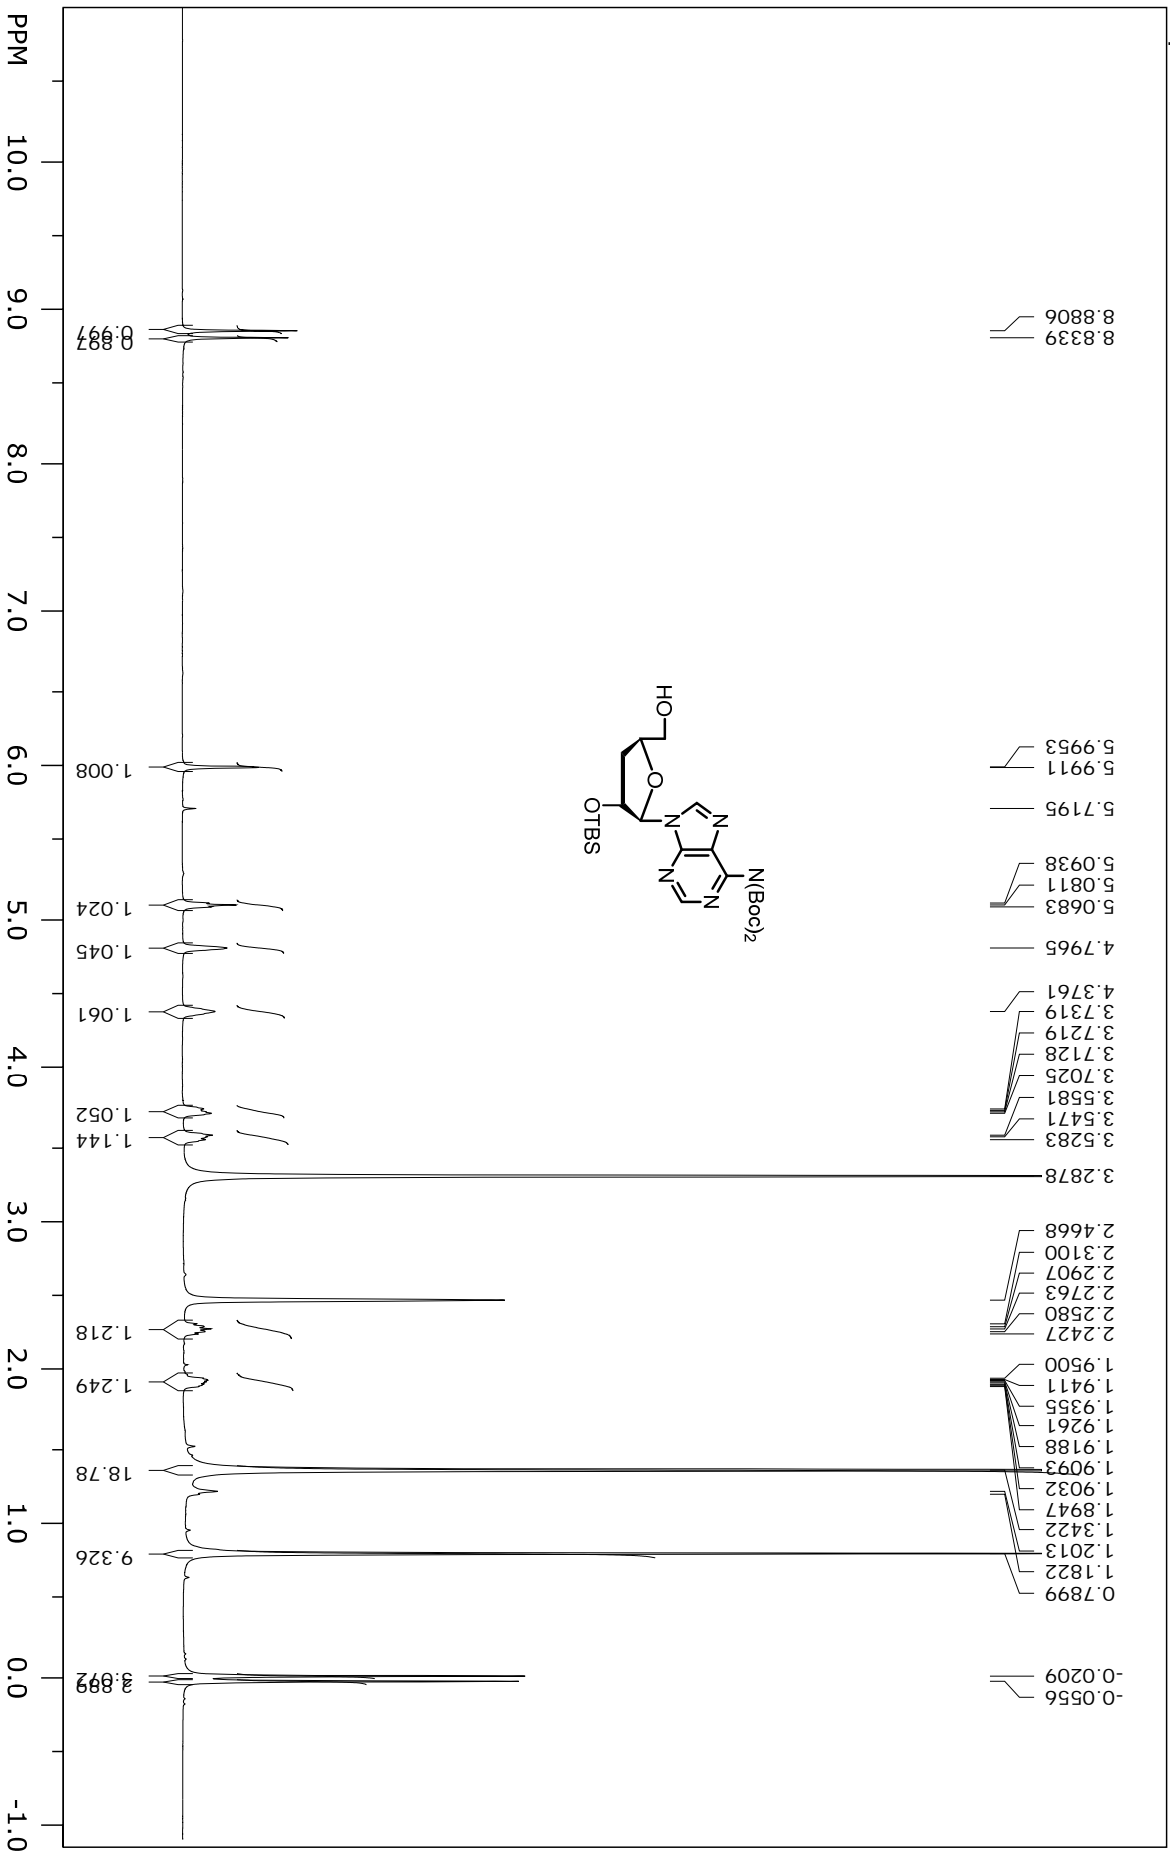

file: ...-02-125-PROTON\_20131014\_01.fid\fid block# 1 exp1: "s2pu1"  
 transmitter freq.: 399.751031 MHz  
 time domain size: 32768 points  
 width: 6410.26 Hz = 16.0356 ppm = 0.195626 Hz/pt  
 number of scans: 256

freq. of 0 ppm: 399.748633 MHz  
 processed size: 32768 complex points  
 LB: 0.000 GF: 0.0000  
 Hz/cm: 193.851 ppm/cm: 0.48493



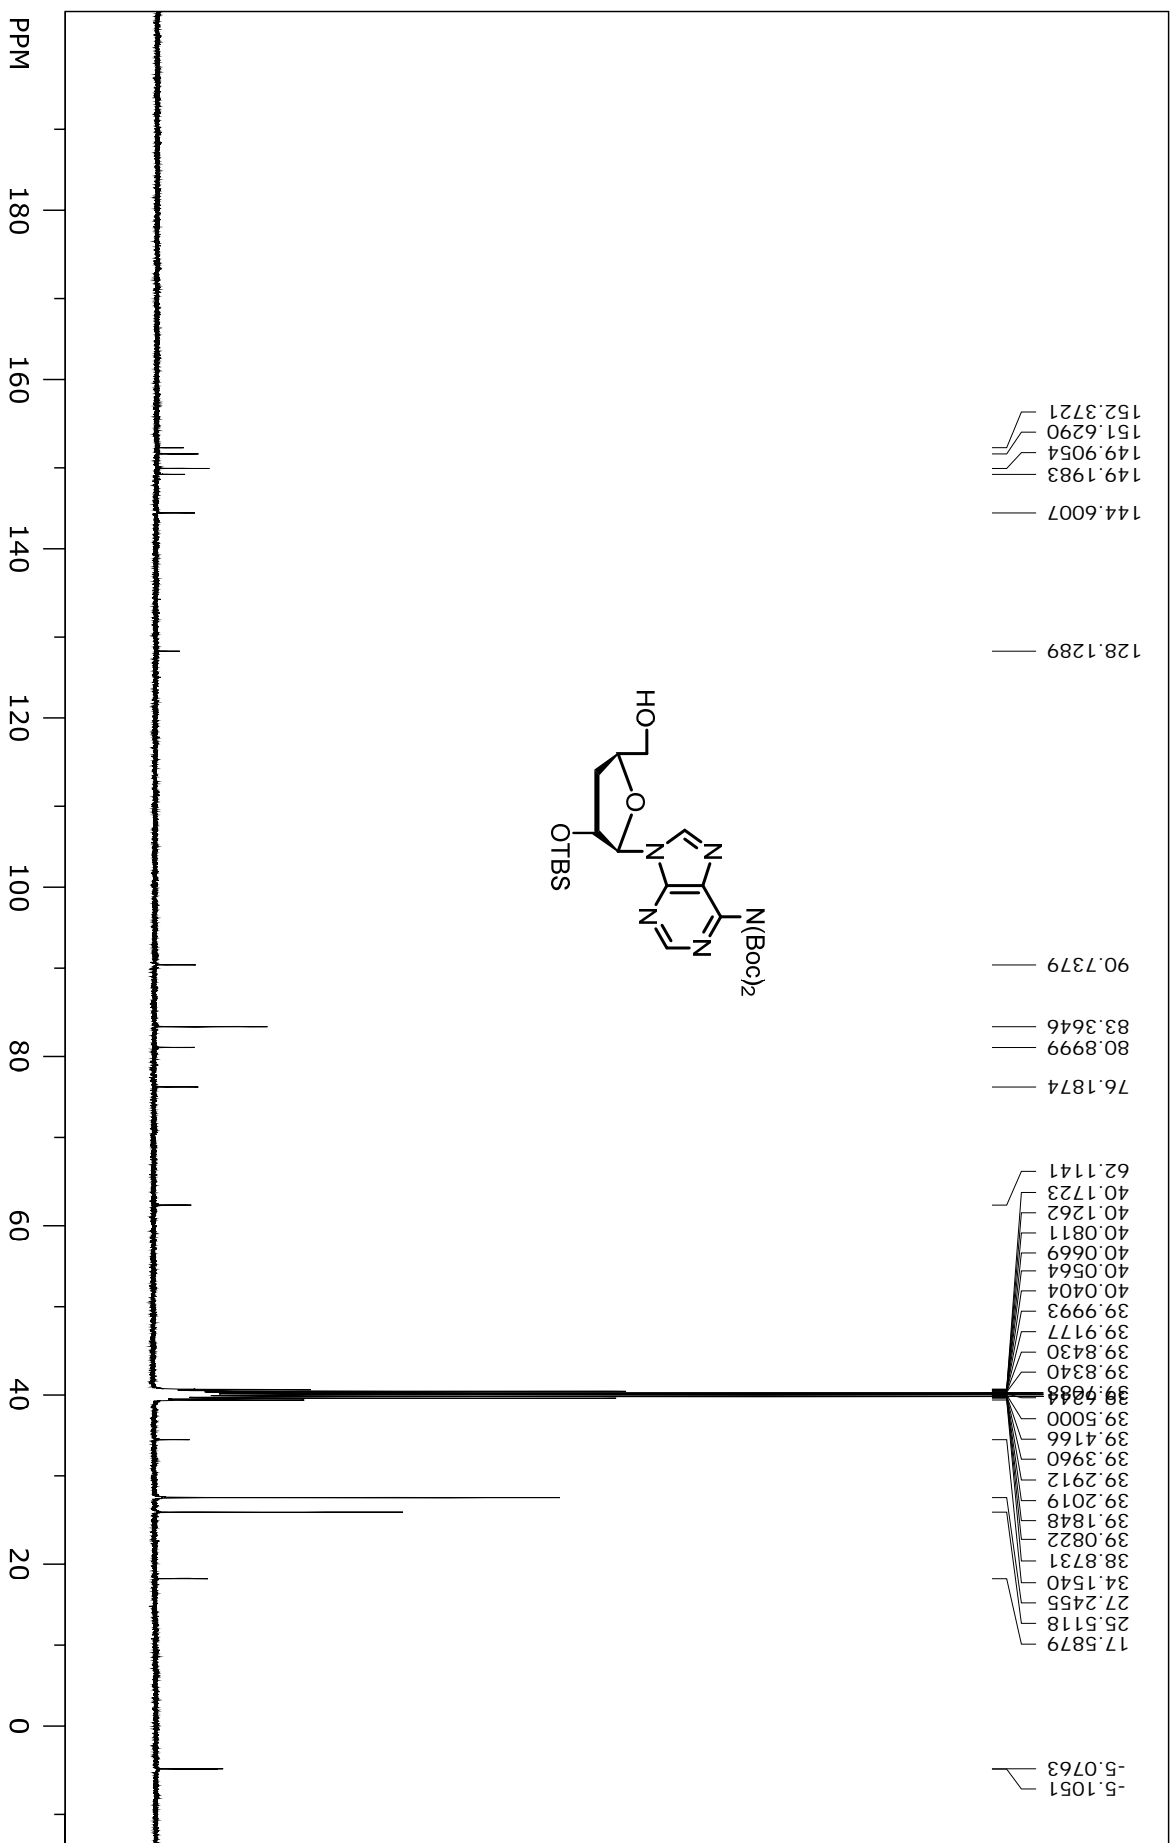

file: ...-02-125-CARBON\_20131016\_01.fid\fid block# 1 expt: "szpul"  
 transmitter freq.: 100.527931 MHz  
 time domain size: 65536 points  
 width: 25000.00 Hz = 248.6871 ppm = 0.381470 Hz/pt  
 number of scans: 7000

freq. of 0 ppm: 100.516918 MHz  
 processed size: 65536 complex points  
 LB: 0.000 GF: 0.0000  
 Hz/cm: 878.010 ppm/cm: 8.73399

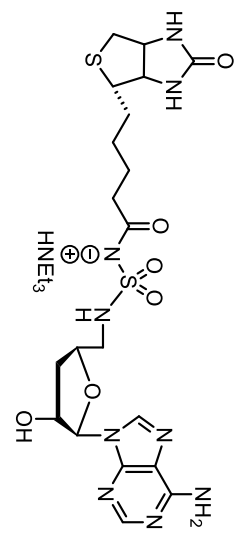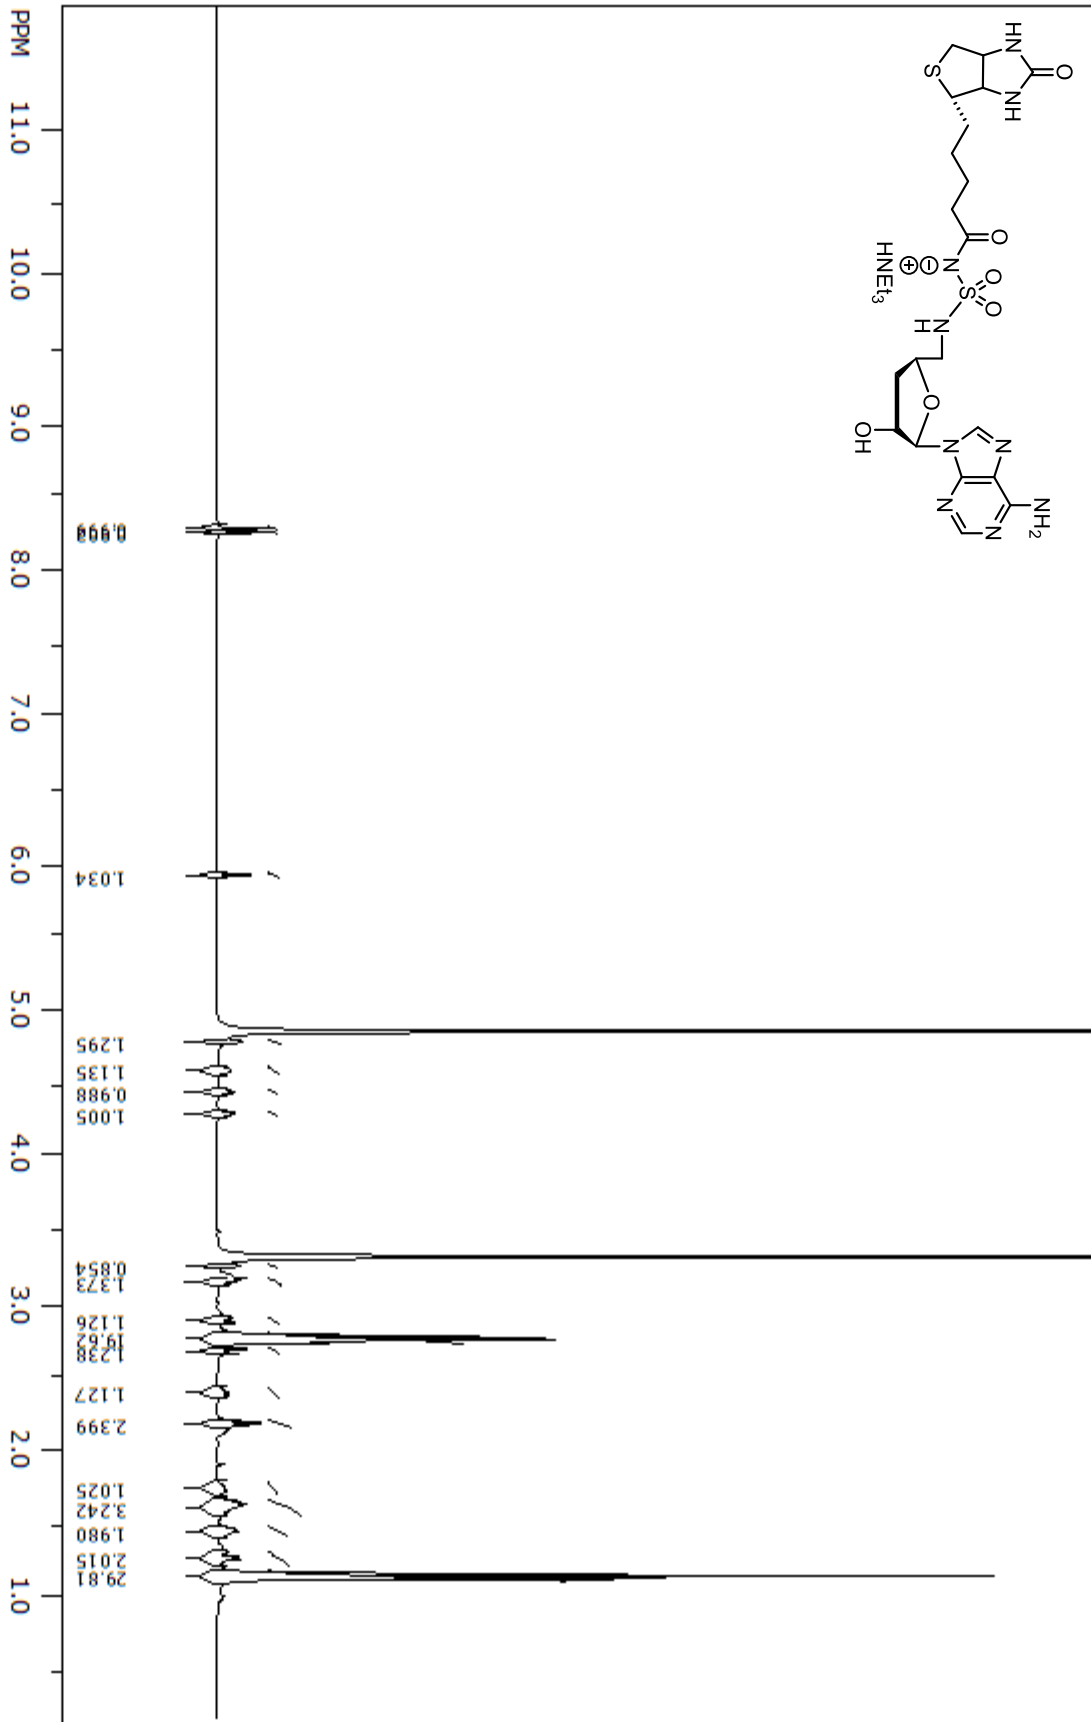

file: ...5K-02-131-MEOD\_20140211\_01.fid\rd block= 1 expt: "szpul"  
 transmitter freq.: 399.74193 MHz  
 time domain size: 32768 points  
 width: 6410.26 Hz = 16.0359 ppm = 0.195626 Hz/pt  
 number of scans: 64

freq. of 0 ppm: 399.741792 MHz  
 processed size: 32768 complex points  
 LB: 0.000 GF: 0.0000  
 Hz/cm: 187.266 ppm/cm: 0.46846

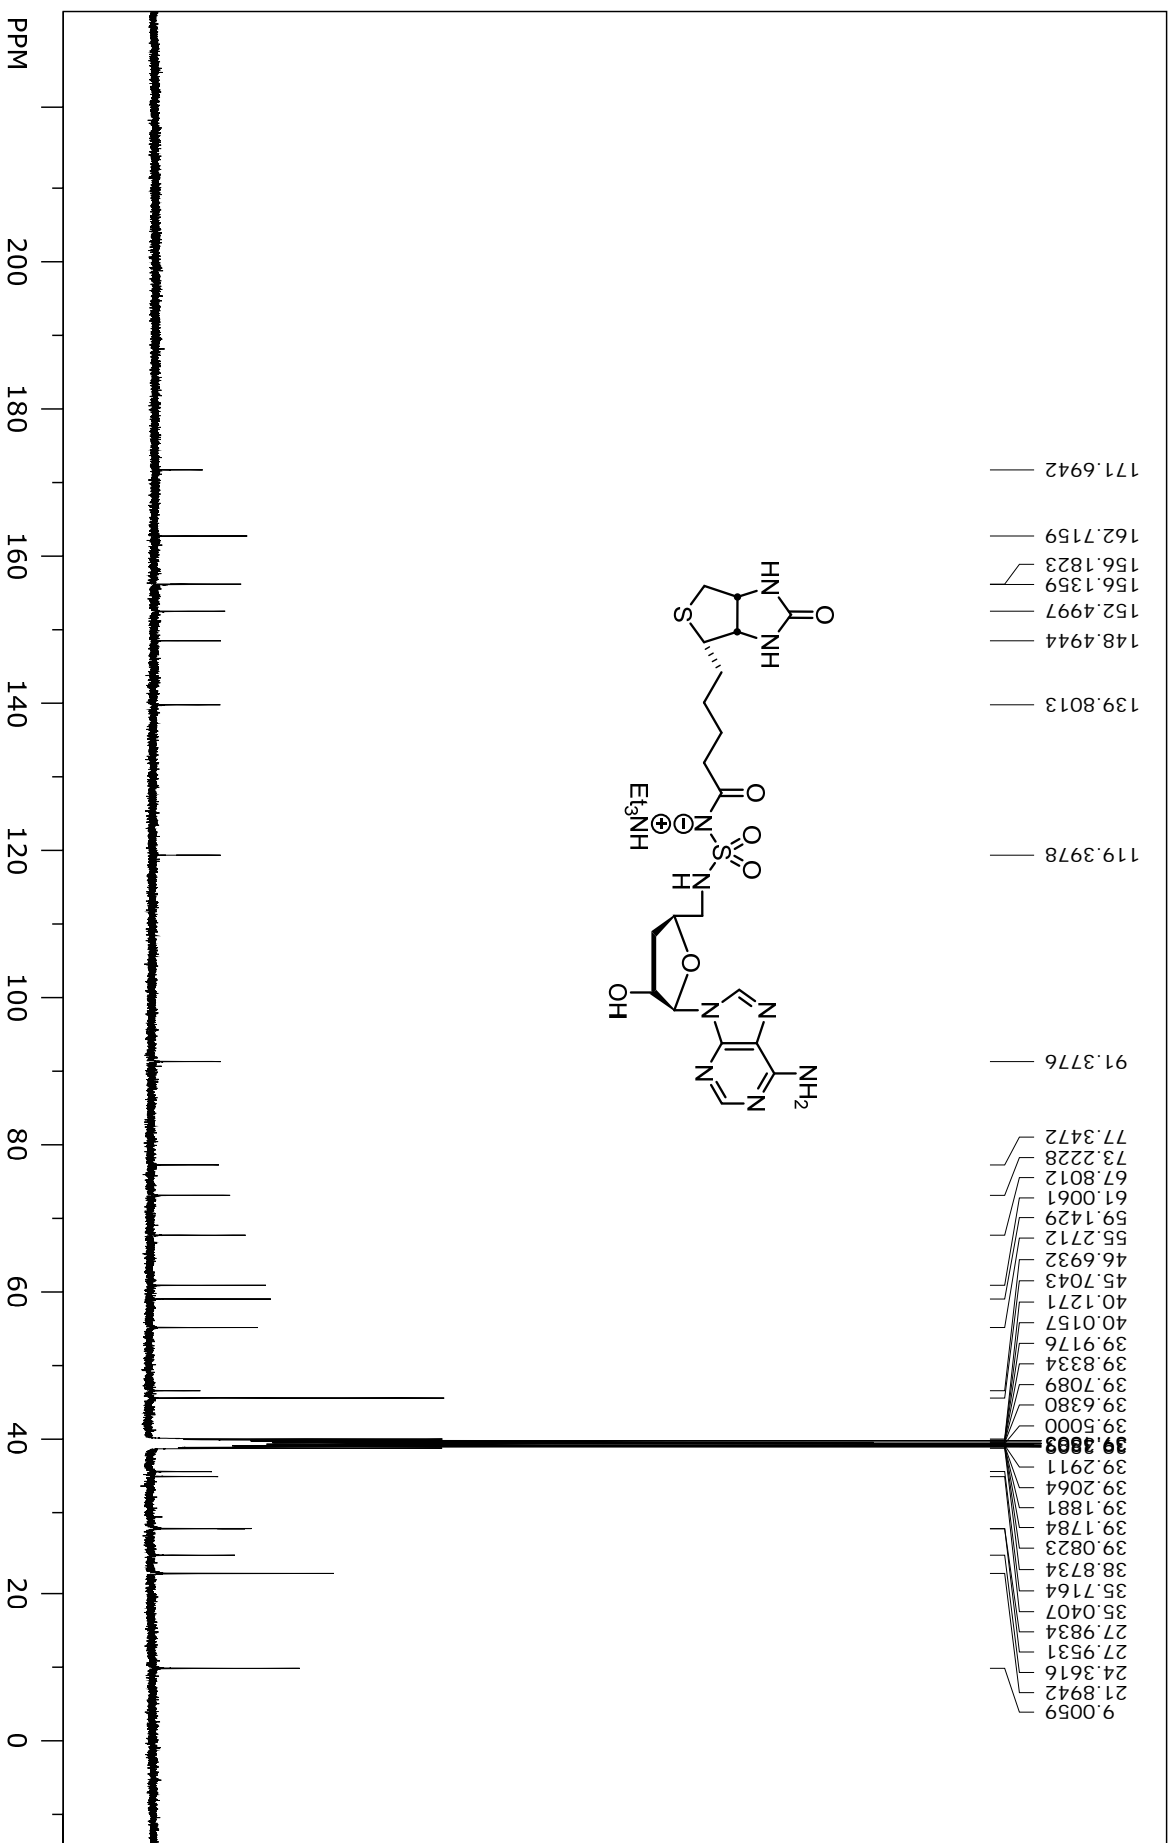

file: ...1-FINAL-ANALOG\_20131017\_01.fid\fid block# 1 exp1: "s2pu1"  
 transmitter freq.: 100.527931 MHz  
 time domain size: 65536 points  
 width: 25000.00 Hz = 248.6871 ppm = 0.381470 Hz/pt  
 number of scans: 7000

freq. of 0 ppm: 100.516918 MHz  
 processed size: 65536 complex points  
 LB: 0.000 GF: 0.0000  
 Hz/cm: 1000.000 ppm/cm: 9.94748

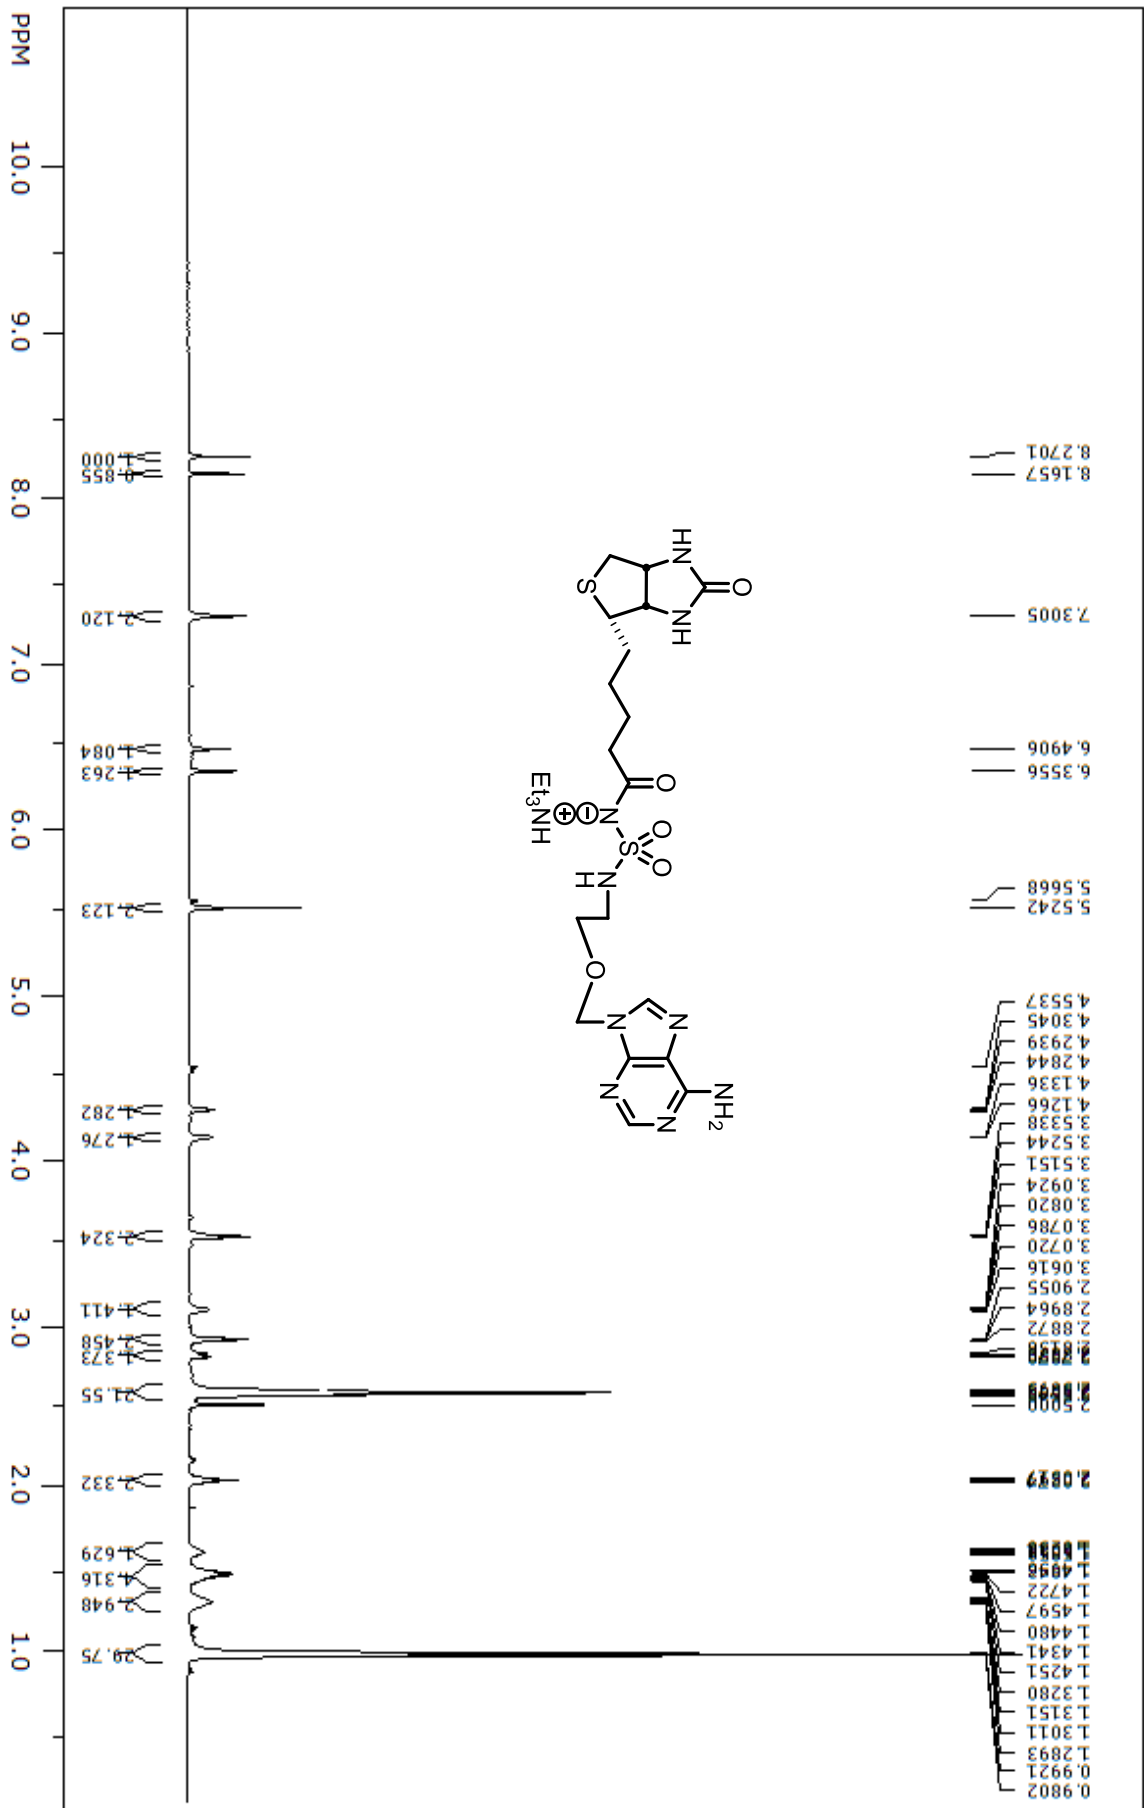

file: ...CYCLO-NUCLEOSIDE\_PROTON\_01.fid\fid\_block# 1 expt: "s2pu1"  
 transmitter freq.: 599.672148 MHz  
 time domain size: 32768 points  
 width: 9615.38 Hz = 16.0344 ppm = 0.293438 Hz/pt  
 number of scans: 64

freq. of 0 ppm: 599.668533 MHz  
 processed size: 32768 complex points  
 LB: 0.000 GF: 0.0000  
 Hz/cm: 261.966 ppm/cm: 0.43685

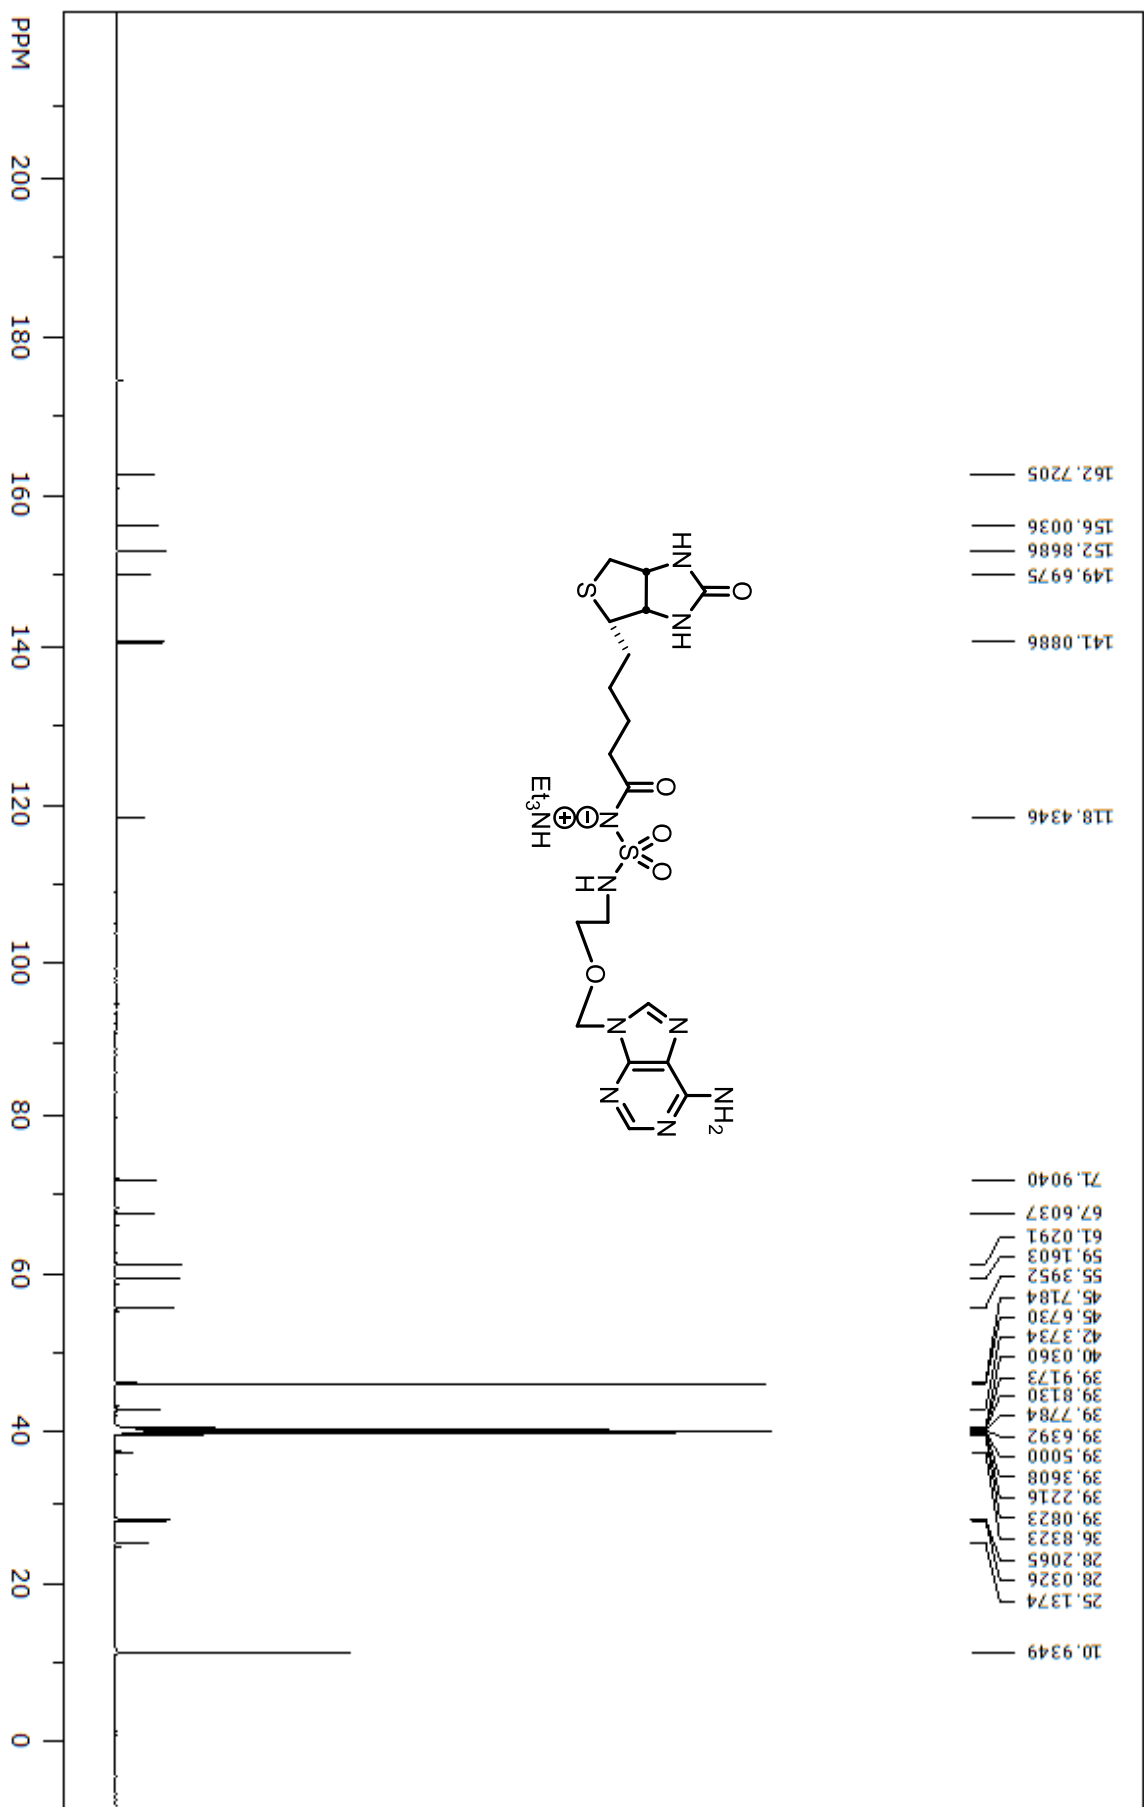

file: ...SK-02-295-CARBON\_CARBON\_01.fid\fid block# 1 expt: "s2pul"  
 transmitter freq.: 150.803363 MHz  
 time domain size: 65536 points  
 width: 37878.79 Hz = 251.1800 ppm = 0.577984 Hz/pt  
 number of scans: 25000

freq. of 0 ppm: 150.786845 MHz  
 processed size: 65536 complex points  
 LB: 0.000 GF: 0.0000  
 Hz/cm: 1393.098 ppm/cm: 9.23784
